# Supplementary material
Source: PubMed Central journal article supplement (PMC5971658)
Supplement: NIHMS967700-supplement-Supplemental.pdf [file NIHMS967700-supplement-Supplemental.pdf]

# Supplementary Information

## Nickel-Catalyzed Dearomative *trans*-1,2-Carboamination

Lucas W. Hernandez, Ulrich Klöckner, Jola Pospech, Lilian Hauss, David Sarlah\*

Roger Adams Laboratory, Department of Chemistry, University of Illinois, Urbana, Illinois  
61801, United states

correspondence to: David Sarlah, [sarlah@illinois.edu](mailto:sarlah@illinois.edu)

### TABLE OF CONTENTS

|                                                                                 |      |
|---------------------------------------------------------------------------------|------|
| <b>1. General Experimental</b>                                                  | S2   |
| <b>2. Experimental Setup</b>                                                    | S3   |
| 2-1. LED light source                                                           | S3   |
| 2-2. Setup for large scale dearomative carboamination                           | S4   |
| 2-3. Setup for small scale dearomative carboamination                           | S5   |
| <b>3. Experimental Procedures</b>                                               | S6   |
| 3-1. Enantioselective dearomative <i>trans</i> -1,2-carboamination              | S6   |
| 3-2. Racemic dearomative <i>trans</i> -1,2-carboamination of mononuclear arenes | S6   |
| 3-3. Racemic dearomative <i>trans</i> -1,2-carboamination of polynuclear arenes | S6   |
| 3-4. Optimization of reaction conditions                                        | S7   |
| <b>4. Characterization of Carboamination Products</b>                           | S8   |
| <b>5. Derivatization of Carboamination Products</b>                             | S27  |
| 5-1. Synthesis of <b>4</b>                                                      | S27  |
| 5-2. Synthesis of <b>5</b>                                                      | S28  |
| 5-3. Synthesis of <b>6</b>                                                      | S30  |
| 5-4. Synthesis of <b>7</b>                                                      | S32  |
| 5-5. Synthesis of <b>8</b>                                                      | S34  |
| 5-6. Synthesis of <b>9</b>                                                      | S36  |
| <b>6. HPLC Spectra</b>                                                          | S37  |
| <b>7. Crystallographic Data for Compounds 2p and 3e</b>                         | S53  |
| 7-1. Data for compound 2p                                                       | S53  |
| 7-2. Data for compound 3e                                                       | S54  |
| <b>8. NMR Spectra</b>                                                           | S55  |
| <b>9. References</b>                                                            | S182 |

## 1. General experimental

Unless otherwise noted, all reactions were carried out under an inert atmosphere. All chemicals were purchased from commercial suppliers and used as received. *N*-methyl-1,2,4-triazoline-3,5-dione (MTAD) was prepared based on the literature procedures<sup>1,2</sup> and was resublimed before use. Unless otherwise noted, Grignard reagents were prepared as a 3.0 M solution in anhydrous tetrahydrofuran (THF). (*R,R*)-*i*Pr-phosferrox was prepared based on the literature procedure<sup>3,4</sup> from D-valinol. C<sub>18</sub>-derivatized SiO<sub>2</sub> was prepared according to the literature procedure.<sup>5</sup> Dry dichloromethane (CH<sub>2</sub>Cl<sub>2</sub>), benzene, and THF were obtained by passing commercially available anhydrous, oxygen-free HPLC-grade solvents through activated alumina columns. Analytical thin-layer chromatography was performed on Merck silica gel 60 F<sub>254</sub> glass plates. Visualization was accomplished with UV light and/or potassium permanganate (KMnO<sub>4</sub>). Retention factor (*R*<sub>f</sub>) values reported were measured using a 5 × 2 cm TLC plate in a developing chamber containing the solvent system described. Flash column chromatography was performed using Silicycle SiliaFlash® P60 (SiO<sub>2</sub>, 40-63 μm particle size, 230-400 mesh). <sup>1</sup>H and <sup>13</sup>C NMR spectra were recorded on Bruker 500 (500 MHz, <sup>1</sup>H; 126 MHz, <sup>13</sup>C) or Varian Unity Inova 500 (500 MHz, <sup>1</sup>H) MHz spectrometers. Spectra are referenced to residual chloroform ( $\delta = 7.26$  ppm, <sup>1</sup>H; 77.16 ppm, <sup>13</sup>C), residual dimethyl sulfoxide ( $\delta = 2.50$  ppm, <sup>1</sup>H; 39.5 ppm, <sup>13</sup>C), residual methanol ( $\delta = 3.31$  ppm, <sup>1</sup>H; 49.0 ppm, <sup>13</sup>C), or residual benzene ( $\delta = 7.16$  ppm, <sup>1</sup>H; 128.06 ppm, <sup>13</sup>C). Chemical shifts are reported in parts per million (ppm). Multiplicities are indicated by s (singlet), d (doublet), t (triplet), q (quartet), m (multiplet), and br (broad). Coupling constants *J* are reported in Hertz (Hz). Mass spectrometry (MS) was performed by the University of Illinois Mass Spectrometry Laboratory. Electron Impact (EI<sup>+</sup>) spectra were performed at 70 eV using methane as the carrier gas, with time-of-flight (TOF) mass analyzer. Electrospray ionization (ESI<sup>+</sup>) spectra were performed using a time-of-flight (TOF) mass analyzer. Data are reported in the form of *m/z* (intensity relative to the base peak = 100). For several compounds, Waters Q-TOF Ultima ESI and Agilent 6230 ESI TOF LC/MS spectrometers were used to obtain the high resolution mass spectra. Infrared spectra were measured neat on a Perkin-Elmer spectrum BX FT-IR spectrometer. Peaks are reported in cm<sup>-1</sup> with indicated relative intensities: s (strong, 0–33% T); m (medium, 34–66% T), w (weak, 67–100% T), and br (broad). Visible-light spectrum of LED was recorded using an Avantes Sensline Avaspec-ULS TEC Spectrometer. Melting points of solids, compounds that solidified after chromatography, were measured on a Buchi B-540 melting point apparatus and are uncorrected. Optical rotations were recorded on a Jasco P-2000 polarimeter at 589 nm, and are reported in units of 10<sup>-1</sup> (deg cm<sup>2</sup> g<sup>-1</sup>). HPLC was performed on a Shimadzu Prominence HPLC system with SPD-M20A UV/VIS Photodiode array detector (220 nm).

## 2. Experimental Setup

### 2-1. LED light source

Generic cool white light LED corn bulbs were used for the photochemical experiments. These can be obtained from several manufactures over amazon.com and proved to give consistent results as well as identical visible spectra. Detailed info:

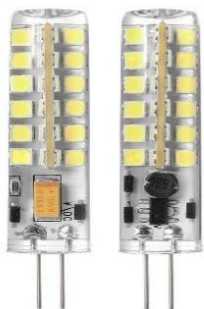

Socket: G4

LED Chip: 48 LEDs SMD 2835

Consume wattage: 4W

Input voltage: AC / DC 12V

Beam degree: 360 degrees

Color temperature: 6500K (Cool White)

Initial lumens (lm): 290

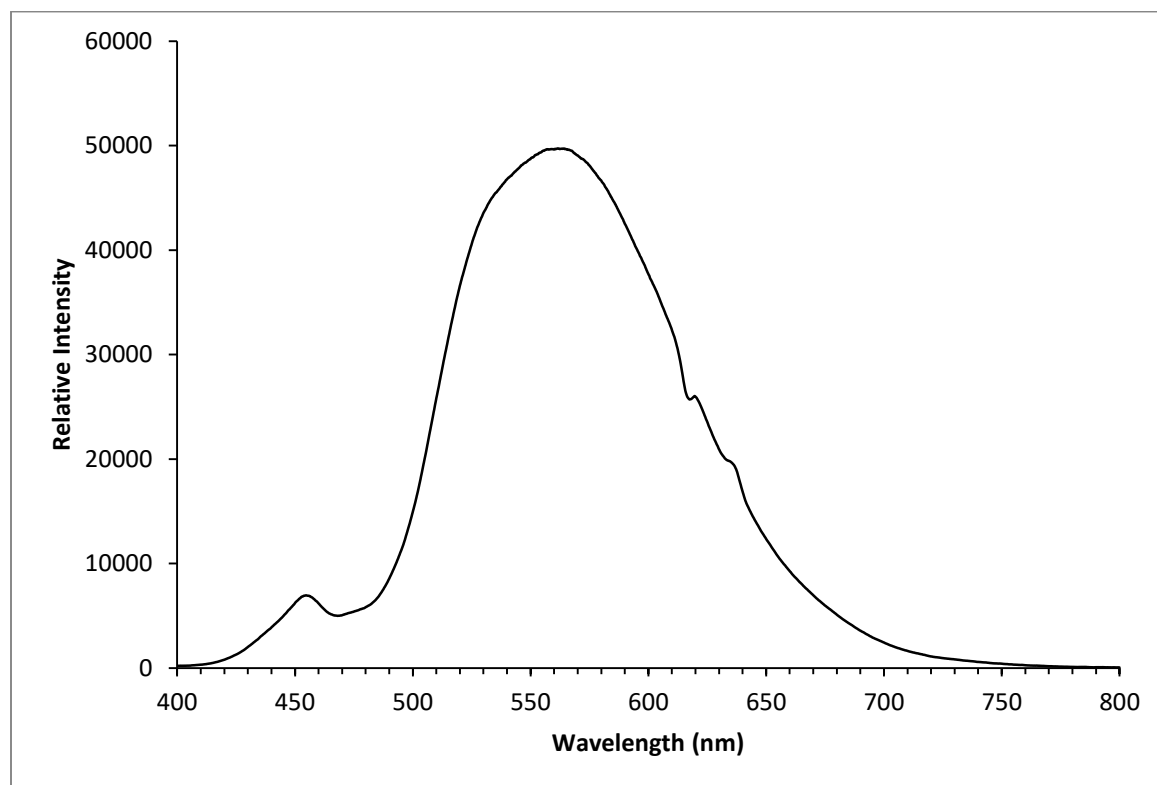

**Spectra S1. Spectrum of a LED bulb used.**

## 2-2. Photochemical setup for large scale reactions.

Eight 4W LED corn bulbs (12V, cool white light 6500K) were wired to a suitable 12V power supply, then sealed into test tubes and capped with septa (see Picture S1). Lights were arranged in a carousel fashion around a 1 L clear borosilicate glass bottle (Picture S1). A normal reagent or media bottle can be used. The whole setup was kept submerged in a  $-78\text{ }^{\circ}\text{C}$  bath during the photochemical reaction.

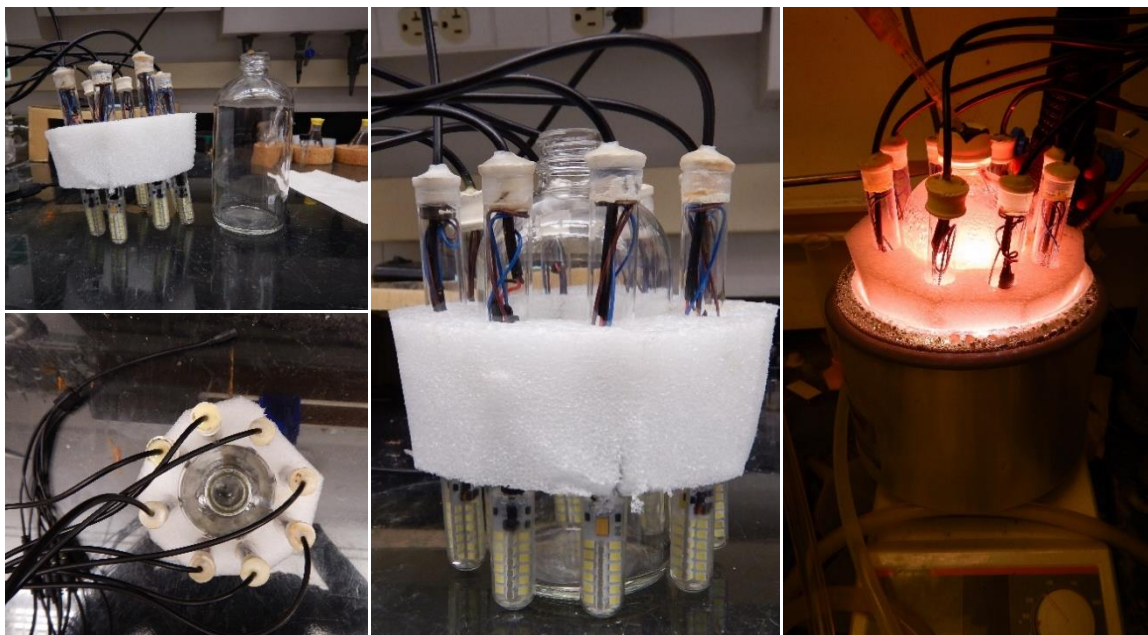

**Picture S1. Photochemical set-up for dearomative carboamination.**

### 2-3. Photochemical setup for small scale reactions.

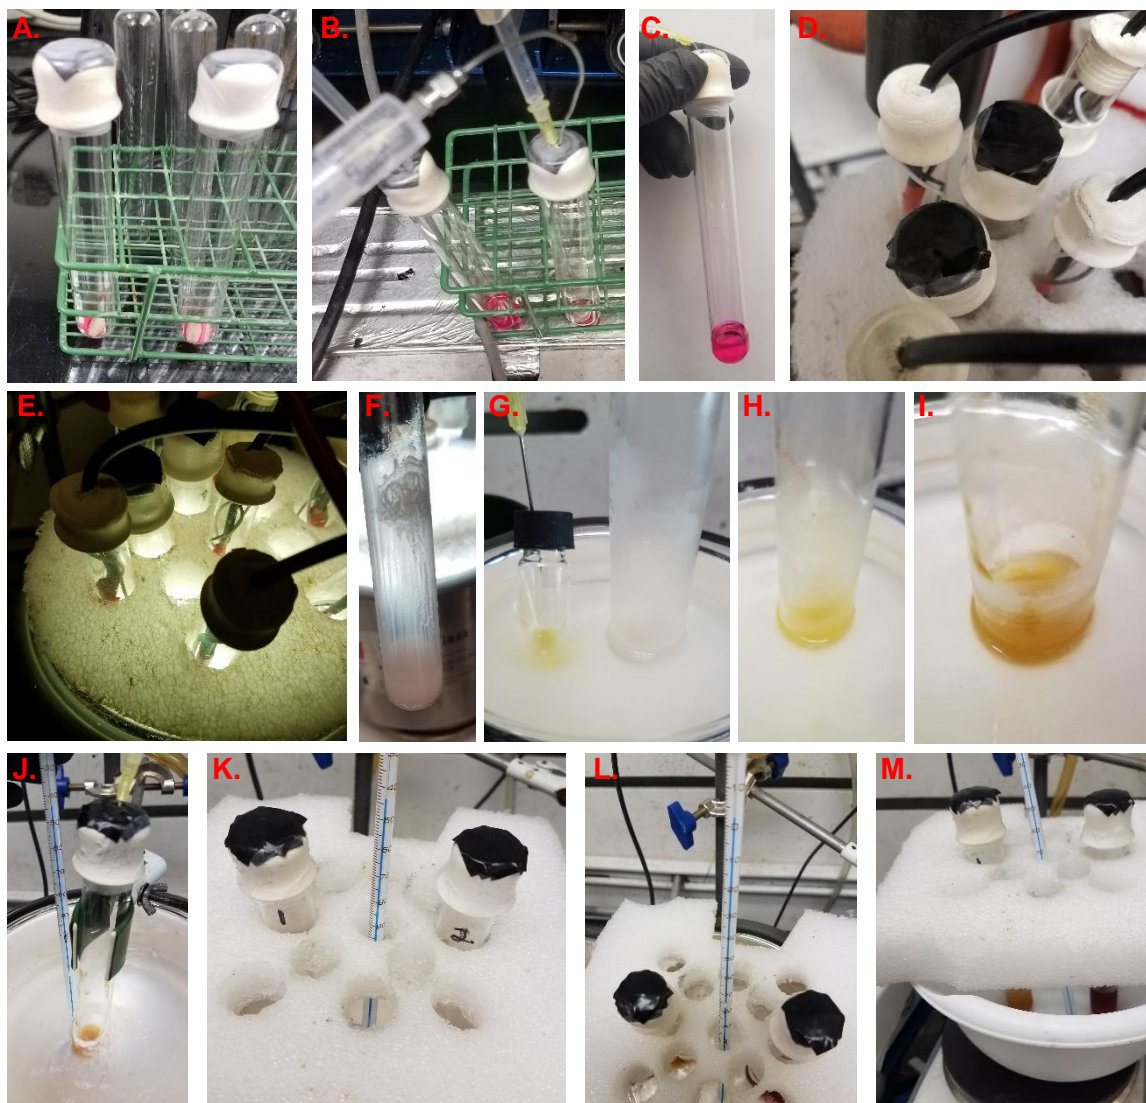

**Picture S2. Photochemical set-up for small scale reactions.** **A.** MTAD (1) was weighed into an oven-dried test tube and the atmosphere was exchanged with nitrogen. **B.** Solvent was then added. **C.** Photo of the solution of MTAD in  $\text{CH}_2\text{Cl}_2$  before the addition of arene. **D.** The reactions were cooled to  $-78\text{ }^\circ\text{C}$  followed by the addition of arene [note: if the substrate was a solid, it was added at point A. and the solvent was added after cooling], then sealed with vinyl tape. **E.** Irradiation was then commenced. **F.** Completion of irradiation results in loss of pink color. **G.** The reaction was placed in a small  $-78\text{ }^\circ\text{C}$  bath for ease of visualization during addition of reagents and the catalyst was pre-cooled before transfer. **H.** The reaction after addition of catalyst. **I.** The reaction after dropwise addition of the Grignard reagent. **J.** The reaction was then placed in a  $-45\text{ }^\circ\text{C}$  bath. **K.** The reactions were then sealed with vinyl tape and left to stir for three hours. **L.** Over the three-hour period the bath warmed to  $0\text{ }^\circ\text{C}$ . **M.** The reactions were then stirred for 15 minutes at room temperature before quenching.

### 3. Experimental Procedures

#### 3-1. Enantioselective dearomative *trans*-1,2-carboamination

General Procedure A: In an oven-dried test tube, MTAD (**1**, 57.0 mg, 0.50 mmol, 1.0 equiv.) was dissolved in anhydrous CH<sub>2</sub>Cl<sub>2</sub> (2.5 mL) under nitrogen atmosphere and cooled to –78 °C. Arene (10 equiv.) was slowly added and the solution was stirred for five minutes. The pink solution was irradiated with LED lights at –78 °C until complete loss of color. Upon decolorization, the LED lights were turned off and a pre-cooled (–78 °C) solution of [Ni(acac)<sub>2</sub>] (1.93 mg, 7.50 μmol, 1.5 mol %) and (*R,R*)-*i*Pr-Phosferrox (4.81 mg, 0.01 mmol, 2.0 mol %) in CH<sub>2</sub>Cl<sub>2</sub> (0.3 mL) was added, followed by dropwise addition of Grignard reagent (417 μL, 3.0 M in THF, 1.25 mmol, 2.5 equiv.) at the rate to keep the internal temperature below –65 °C. After addition, the cold bath temperature was warmed to –45 °C and allowed to slowly warm to 0 °C over 3 h. Reaction vessel was removed from the cold bath, stirred at room temperature for 15 min, and then quenched with aq. HCl (2 mL, 1M). The organic phase was separated, and the aqueous phase was extracted with CH<sub>2</sub>Cl<sub>2</sub> (2 × 4 mL). The combined organic extracts were dried over MgSO<sub>4</sub>, filtered and concentrated under reduced pressure. The residue was purified by flash chromatography to give the desired compound.

#### 3-2. Racemic dearomative *trans*-1,2-carboamination of mononuclear arenes

General Procedure B: In an oven-dried test tube, MTAD (**1**, 57.0 mg, 0.50 mmol, 1.0 equiv.) was dissolved in anhydrous CH<sub>2</sub>Cl<sub>2</sub> (2.5 mL) under nitrogen atmosphere and cooled to –78 °C. Arene (10 equiv.) was slowly added and the solution was stirred for five minutes. The pink solution was irradiated with LED lights at –78 °C until complete loss of color. Upon decolorization, the LED lights were turned off and a pre-cooled (–78 °C) solution of [Ni(cod)<sub>2</sub>] (6.88 mg, 0.025 mmol, 10 mol %) and dppf (55 mg, 0.10 mmol, 20 mol %) in CH<sub>2</sub>Cl<sub>2</sub> (2.0 mL) was added, followed by dropwise addition of Grignard reagent (417 μL, 3.0 M in THF, 1.25 mmol, 2.5 equiv.) at the rate to keep the internal temperature below –65 °C. After addition, the cold bath temperature was warmed to –45 °C and allowed to slowly warm to 0 °C over 3 h. Reaction vessel was removed from the cold bath, stirred at room temperature for 15 min, and then quenched with aq. HCl (2 mL, 1M). The organic phase was separated, and the aqueous phase was extracted with CH<sub>2</sub>Cl<sub>2</sub> (2 × 4 mL). The combined organic extracts were dried over MgSO<sub>4</sub>, filtered and concentrated under reduced pressure. The residue was purified by flash chromatography to give the desired compound.

#### 3-3. Racemic dearomative *trans*-1,2-carboamination of polynuclear arenes

General Procedure C: In an oven-dried test tube, MTAD (**1**, 57.0 mg, 0.50 mmol, 1.0 equiv.) was dissolved in anhydrous CH<sub>2</sub>Cl<sub>2</sub> (5 mL) under nitrogen atmosphere and cooled to –78 °C. Arene (2.0 equiv.) was slowly added and the solution was stirred for five minutes. The pink solution was irradiated with LED lights at –78 °C until complete loss of color. Upon decolorization, the LED lights were turned off and a pre-cooled (–78 °C) solution of [Ni(cod)<sub>2</sub>] (6.88 mg, 0.025 mmol, 10 mol %) and dppf (55 mg, 0.10 mmol, 20 mol %) in CH<sub>2</sub>Cl<sub>2</sub> (2.0 mL) was added, followed by dropwise addition of Grignard reagent (417 μL, 3.0 M in THF, 1.25 mmol, 2.5 equiv.) at the rate

to keep the internal temperature below  $-65\text{ }^{\circ}\text{C}$ . After addition, the cold bath temperature was warmed to  $-45\text{ }^{\circ}\text{C}$  and allowed to slowly warm to  $0\text{ }^{\circ}\text{C}$  over 3 h. Reaction vessel was removed from the cold bath, stirred at room temperature for 15 min, and then quenched with aq. HCl (2 mL, 1M). The organic phase was separated, and the aqueous phase was extracted with  $\text{CH}_2\text{Cl}_2$  ( $2 \times 4$  mL). The combined organic extracts were dried over  $\text{MgSO}_4$ , filtered and concentrated under reduced pressure. The residue was purified by flash chromatography to give the desired compound.

### 3-4. Optimization of reaction conditions

**Table S1:** Evaluation of Ni(II) salts and optimization of reaction conditions

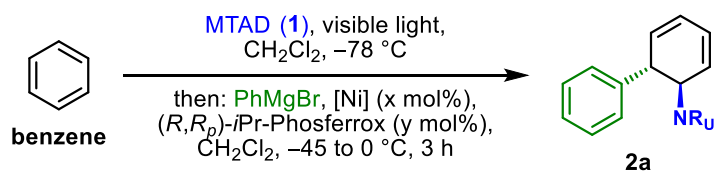

| Entry           | Grignard equiv. | [Ni]                     | x (mol%) | y (mol%) | Yield (%) <sup>a</sup> | e.r.     |
|-----------------|-----------------|--------------------------|----------|----------|------------------------|----------|
| 1               | 2.5             | Ni(cod) <sub>2</sub>     | 10       | 20       | 70                     | 95:5     |
| 2               | 2.5             | Ni(cod) <sub>2</sub>     | 5.0      | 10       | 67                     | 95:5     |
| 3               | 2.0             | Ni(cod) <sub>2</sub>     | 5.0      | 10       | 62                     | 95:5     |
| 4               | 2.5             | Ni(cod) <sub>2</sub>     | 5.0      | 7.0      | 65                     | 94.5:5.5 |
| 5               | 2.0             | Ni(cod) <sub>2</sub>     | 5.0      | 7.0      | 62                     | 94:6     |
| 6               | 1.5             | Ni(cod) <sub>2</sub>     | 5.0      | 7.0      | 56                     | 93:7     |
| 7               | 2.5             | NiCl <sub>2</sub>        | 10       | 20       | 42                     | 90:10    |
| 8               | 2.5             | Ni(dmg) <sub>2</sub>     | 10       | 20       | 51                     | 90:10    |
| 9               | 2.5             | NiCl <sub>2</sub> •glyme | 10       | 20       | 55                     | 91:9     |
| 10              | 2.5             | NiBr <sub>2</sub> •glyme | 10       | 20       | 55                     | 93:7     |
| 11              | 2.5             | Ni(acac) <sub>2</sub>    | 10       | 20       | 59                     | 93:7     |
| 12 <sup>b</sup> | 2.5             | Ni(acac) <sub>2</sub>    | 10       | 20       | 56                     | 90:10    |
| 13              | 2.5             | Ni(acac) <sub>2</sub>    | 10       | 12       | 51                     | 95:5     |
| 14              | 3.0             | Ni(acac) <sub>2</sub>    | 5.0      | 7.0      | 67                     | 95:5     |
| 15              | 2.5             | Ni(acac) <sub>2</sub>    | 5.0      | 7.0      | 65                     | 95:5     |
| 16 <sup>c</sup> | 2.5             | Ni(acac) <sub>2</sub>    | 5.0      | 7.0      | 65                     | 95:5     |
| 17 <sup>c</sup> | 2.5             | Ni(acac) <sub>2</sub>    | 2.5      | 3.5      | 66                     | 97:3     |
| 18 <sup>c</sup> | 2.5             | Ni(acac) <sub>2</sub>    | 1.5      | 2.0      | 70                     | 97:3     |
| 19 <sup>c</sup> | 2.5             | Ni(acac) <sub>2</sub>    | 1.0      | 1.4      | 68                     | 96:4     |

a) Isolated yield. b) Ni complex formed in THF. c) [Ni] and (*R,R*<sub>p</sub>)-*i*Pr-Phosferrox weighed out in the air.

## 4. Characterization of Carboamination Products

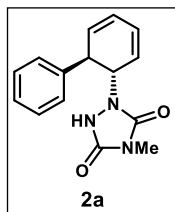

**Synthesis of (+)-2a:** The corresponding compound was prepared following general procedure **A** employing the commercially available 3.0M Grignard reagent in Et<sub>2</sub>O. Purification by flash chromatography (SiO<sub>2</sub>, hexanes:ethyl acetate = 3:1 → 2:1) afforded the product as a colorless solid [94.0 mg, 0.35 mmol, 70%, 97:3 er]. Enantiomeric excess was determined with HPLC analysis using Diacel Chiracel<sup>®</sup> OJ-3 column, 50% *i*PrOH in *n*hexane, 0.8 mL/min *t*<sub>R</sub>(minor) = 4.19 min, *t*<sub>R</sub>(major) = 10.9 min).

### 26.5 mmol scale reaction:

In an oven-dried media bottle, MTAD (**1**, 3.00 g, 26.5 mmol, 1.0 equiv.) was dissolved in anhydrous CH<sub>2</sub>Cl<sub>2</sub> (133 mL) under nitrogen atmosphere and cooled to -78 °C. Benzene (23.7 mL, 265 mmol, 10 equiv.) was slowly added and the solution was stirred for five minutes. The pink solution was irradiated with LED lights at -78 °C until complete loss of color. Upon decolorization, the LED lights were turned off and a pre-cooled (-78 °C) solution of [Ni(acac)<sub>2</sub>] (102 mg, 0.398 mmol, 1.5 mol %) and (*R,R*<sub>p</sub>)-*i*Pr-Phosferrox (255 mg, 0.531 mmol, 2.0 mol %) in CH<sub>2</sub>Cl<sub>2</sub> (16 mL) was added, followed by dropwise addition of freshly prepared Grignard reagent (22.1 mL, 3.0 M in Et<sub>2</sub>O, 66.3 mmol, 2.5 equiv.) at the rate to keep the internal temperature below -65 °C. After addition, the cold bath temperature was warmed to -45 °C and allowed to slowly warm to 0 °C over 3 h. Reaction vessel was removed from the cold bath, stirred at room temperature for 15 min, and then quenched with aq. HCl (100 mL, 1M). The organic phase was separated, and the aqueous phase was extracted with CH<sub>2</sub>Cl<sub>2</sub> (2 × 100 mL). The combined organic extracts were dried over MgSO<sub>4</sub>, filtered, loaded onto silica and concentrated under reduced pressure. Purification by flash chromatography (CH<sub>2</sub>Cl<sub>2</sub>, SiO<sub>2</sub>, hexanes:ethyl acetate = 3:1 → 2:1) afforded the product as a colorless solid [4.63 g, 17.2 mmol, 65%, 97:3 er].

*R*<sub>f</sub> = 0.21 (SiO<sub>2</sub>, hexanes:ethyl acetate = 1:1)

[α]<sub>D</sub><sup>23</sup> = +538.9 (c = 1.00 in CHCl<sub>3</sub>)

m.p. = 167 – 168 °C

<sup>1</sup>H NMR (500 MHz, CDCl<sub>3</sub>) δ 7.68 (s, 1H), 7.35 – 7.26 (m, 5H), 6.35 (ddt, J = 9.6, 5.4, 1.3 Hz, 1H), 6.21 (dddd, J = 9.6, 5.4, 1.9, 0.9 Hz, 1H), 6.00 (ddt, J = 9.6, 4.6, 1.1 Hz, 1H), 5.64 (ddt, J = 9.6, 4.7, 1.1 Hz, 1H), 5.02 (ddd, J = 6.7, 4.7, 1.9 Hz, 1H), 3.78 (ddd, J = 6.7, 4.7, 1.9 Hz, 1H), 3.05 (s, 3H).

<sup>13</sup>C NMR (126 MHz, CDCl<sub>3</sub>) δ 154.8, 153.4, 139.8, 130.0, 129.0, 128.9, 128.1, 127.6, 123.3, 120.7, 56.7, 44.9, 25.4.

HRMS (ESI-TOF, m/z) calcd. For C<sub>15</sub>H<sub>16</sub>N<sub>3</sub>O<sub>2</sub> [M+H]<sup>+</sup> calc.: 270.1243; Found: 270.1243.



**IR** (ATR, neat,  $\text{cm}^{-1}$ ): 3100 (w), 1768 (m), 1688 (s), 1479 (m), 753 (m), 719 (s), 702 (s), 686 (s), 617 (w).

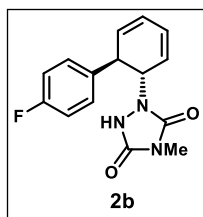

**Synthesis of (+)-2b:** The corresponding compound was prepared following general procedure A. Purification by flash chromatography ( $\text{SiO}_2$ , hexanes:ethyl acetate = 3:1  $\rightarrow$  2:1) afforded the product as a colorless solid [104 mg, 0.36 mmol, 72%, 96.5:3.5 er]. Enantiomeric excess was determined with HPLC analysis using Diacel Chiracel<sup>®</sup> OJ-3 column, 25% *i*PrOH in *n*hexane, 0.8 mL/min  $t_R(\text{minor}) = 6.23$  min,  $t_R(\text{major}) = 8.25$  min.

$R_f = 0.24$  ( $\text{SiO}_2$ , hexanes:ethyl acetate = 1:1)

$[\alpha]_D^{22} = +489.0$  ( $c = 1.00$  in  $\text{CHCl}_3$ )

**m.p.** = 128 – 129 °C

**$^1\text{H}$  NMR** (500 MHz,  $\text{CDCl}_3$ )  $\delta$  7.96 (s, 1H), 7.29 – 7.23 (m, 2H), 7.05 – 6.97 (m, 2H), 6.37 – 6.32 (m, 1H), 6.21 (dddd,  $J = 9.6, 5.4, 2.0, 1.0$  Hz, 1H), 5.97 (ddt,  $J = 9.6, 4.6, 1.0$  Hz, 1H), 5.64 (ddt,  $J = 9.6, 4.7, 1.0$  Hz, 1H), 4.96 (ddd,  $J = 7.1, 4.7, 1.7$  Hz, 1H), 3.77 (ddd,  $J = 6.8, 4.6, 2.0$  Hz, 1H), 3.06 (s, 3H).

**$^{13}\text{C}$  NMR** (126 MHz,  $\text{CDCl}_3$ )  $\delta$  163.3, 161.3, 154.8 (d,  $J = 207.2$  Hz), 135.6 (d,  $J = 3.29$  Hz), 129.8, 129.7 (d,  $J = 8.1$  Hz), 129.0, 123.6, 120.8, 115.7 (d,  $J = 21.3$  Hz), 57.0, 44.1, 25.4.

**$^{19}\text{F}$  NMR** (471 MHz,  $\text{CDCl}_3$ )  $\delta$  -115.03 (ddd,  $J = 13.6, 8.3, 5.1$  Hz).

**HRMS** (ESI-TOF,  $m/z$ ) calcd. For  $\text{C}_{15}\text{H}_{15}\text{N}_3\text{O}_2\text{F}$   $[\text{M}+\text{H}]^+$  calc.: 288.1148; Found: 288.1156.

**IR** (ATR, neat,  $\text{cm}^{-1}$ ): 3045 (w), 2251 (w), 1764 (w), 1683 (s), 1507 (m), 1478 (m), 1222 (m), 834 (w).

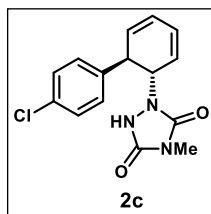

**Synthesis of (+)-2c:** The corresponding compound was prepared following general procedure A. Purification by flash chromatography ( $\text{SiO}_2$ , hexanes:ethyl acetate = 3:1  $\rightarrow$  2:1) afforded the product as a colorless solid [106 mg, 0.35 mmol, 70%, 96.5:3.5 er]. Enantiomeric excess was determined with HPLC analysis using Diacel Chiracel<sup>®</sup> OJ-3 column, 15% *i*PrOH in *n*hexane, 0.8 mL/min  $t_R(\text{minor}) = 9.46$  min,  $t_R(\text{major}) = 10.9$  min.

$R_f = 0.24$  ( $\text{SiO}_2$ , hexanes:ethyl acetate = 1:1)

$[\alpha]_D^{22} = +531.0$  ( $c = 1.00$  in  $\text{CHCl}_3$ )

**m.p.** = 128 – 129 °C

**<sup>1</sup>H NMR** (500 MHz, CDCl<sub>3</sub>) δ 8.20 (s, 1H), 7.23 – 7.18 (m, 2H), 7.18 – 7.11 (m, 2H), 6.24 (ddt, J = 9.6, 5.4, 1.1 Hz, 1H), 6.11 (dddd, J = 9.6, 5.4, 1.8, 1.1 Hz, 1H), 5.85 (ddt, J = 9.6, 4.6, 1.1 Hz, 1H), 5.54 (ddt, J = 9.6, 4.6, 1.1 Hz, 1H), 4.87 (ddd, J = 7.1, 4.6, 1.8 Hz, 1H), 3.67 (ddd, J = 7.1, 4.6, 1.8 Hz, 1H), 2.96 (s, 3H).

**<sup>13</sup>C NMR** (126 MHz, CDCl<sub>3</sub>) δ 155.1, 153.3, 138.5, 133.4, 129.5, 129.4, 129.0, 128.9, 123.7, 120.9, 56.8, 44.2, 25.4.

**HRMS** (ESI-TOF, m/z) calcd. For C<sub>15</sub>H<sub>15</sub>N<sub>3</sub>O<sub>2</sub>Cl [M+H]<sup>+</sup> calc.: 304.0853; Found: 304.0852.

**IR** (ATR, neat, cm<sup>-1</sup>): 3045 (w), 1764 (m), 1682 (s), 1478 (s), 1400 (w), 1092 (m), 1015 (m), 828 (m), 728 (m).

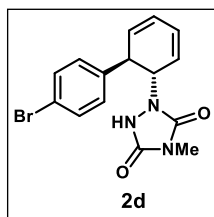

**Synthesis of (+)-2d:** The corresponding compound was prepared following general procedure A. Purification by flash chromatography (SiO<sub>2</sub>, hexanes:ethyl acetate = 3:1 → 2:1) afforded the product as a colorless solid [115 mg, 0.33 mmol, 66%, 96.5:3.5 er]. Enantiomeric excess was determined with HPLC analysis using Diacel Chiracel<sup>®</sup> OJ-3 column, 15% *i*PrOH in *n*hexane, 0.8 mL/min t<sub>R</sub>(minor) = 10.2 min, t<sub>R</sub>(major) = 11.3 min.

**R<sub>f</sub>** = 0.24 (SiO<sub>2</sub>, hexanes:ethyl acetate = 1:1)

**[α]<sub>D</sub><sup>21</sup>** = +420.0 (c = 1.00 in CHCl<sub>3</sub>)

**m.p.** = 122 – 124 °C

**<sup>1</sup>H NMR** (500 MHz, CDCl<sub>3</sub>) δ 7.47 – 7.38 (m, 2H), 7.18 – 7.12 (m, 2H), 6.34 (ddt, J = 9.6, 5.4, 1.3 Hz, 1H), 6.20 (dddd, J = 9.6, 5.4, 1.7, 1.0 Hz, 1H), 5.94 (ddt, J = 9.6, 4.7, 1.3 Hz, 1H), 5.61 (ddt, J = 9.6, 4.8, 1.0 Hz, 1H), 4.91 (ddd, J = 6.3, 4.8, 1.7 Hz, 1H), 3.69 (ddd, J = 6.3, 4.7, 1.7 Hz, 1H), 3.05 (s, 3H).

**<sup>13</sup>C NMR** (126 MHz, CDCl<sub>3</sub>) δ 154.8, 153.4, 138.8, 132.0, 129.9, 129.3, 129.1, 123.7, 121.5, 120.6, 56.4, 44.3, 25.4.

**HRMS** (ESI-TOF, m/z) calcd. For C<sub>15</sub>H<sub>15</sub>N<sub>3</sub>O<sub>2</sub>Br [M+H]<sup>+</sup> calc.: 348.0348; Found: 304.0338.

**IR** (ATR, neat, cm<sup>-1</sup>): 3045 (w), 1764 (m), 1682 (s), 1478 (s), 1400 (w), 1011 (w), 905 (w), 822 (w), 728 (m).

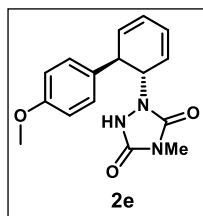

**Synthesis of (+)-2e:** The corresponding compound was prepared following general procedure **A**. Purification by flash chromatography (SiO<sub>2</sub>, hexanes:ethyl acetate = 3:1 → 2:1) afforded the product as a colorless solid [112 mg, 0.37 mmol, 75%, 95.5:4.5 er]. Enantiomeric excess was determined with HPLC analysis using Diacel Chiracel<sup>®</sup> OJ-3 column, 25% *i*PrOH in *n*hexane, 0.8 mL/min *t*<sub>R</sub>(minor) = 8.42 min, *t*<sub>R</sub>(major) = 12.3 min.

*R*<sub>f</sub> = 0.24 (SiO<sub>2</sub>, hexanes:ethyl acetate = 1:1)

[α]<sub>D</sub><sup>22</sup> = +451.0 (c = 1.00 in CHCl<sub>3</sub>)

*m.p.* = 122 – 123 °C

<sup>1</sup>H NMR (500 MHz, CDCl<sub>3</sub>) δ 7.71 (s, 1H), 7.21 – 7.14 (m, 2H), 6.87 – 6.79 (m, 2H), 6.31 (ddt, J = 9.6, 5.3, 1.1 Hz, 1H), 6.21 – 6.11 (m, 1H), 5.96 (ddt, J = 9.6, 4.6, 1.1 Hz, 1H), 5.61 (ddd, J = 9.6, 4.6, 1.1 Hz, 1H), 4.95 (ddd, J = 6.7, 4.6, 1.8 Hz, 1H), 3.78 (s, 3H), 3.70 (ddd, J = 6.7, 4.6, 1.8 Hz, 1H), 3.03 (s, 3H).

<sup>13</sup>C NMR (126 MHz, CDCl<sub>3</sub>) δ 159.1, 154.9, 153.3, 131.7, 130.4, 129.1, 128.9, 123.2, 120.8, 114.3, 57.1, 55.4, 44.0, 25.4.

**HRMS** (ESI-TOF, *m/z*) calcd. For C<sub>16</sub>H<sub>18</sub>N<sub>3</sub>O<sub>3</sub> [M+H]<sup>+</sup> calc.: 300.1348; Found: 300.1337.

**IR** (ATR, neat, cm<sup>-1</sup>): 3042 (w), 2955 (w), 2837 (w), 2250 (w), 1764 (w), 1686 (s), 1511 (m), 1477 (m), 1248 (m).

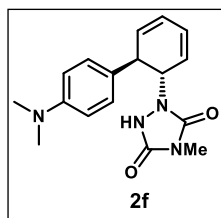

**Synthesis of (+)-2f:** The corresponding compound was prepared following general procedure **A**, and was quenched by the addition of NH<sub>4</sub>Cl (2 mL). Purification by flash chromatography (SiO<sub>2</sub>, hexanes:ethyl acetate = 3:1 → 2:1) afforded the product as a colorless solid [63.0 mg, 0.20 mmol, 40%, 96:4 er]. Enantiomeric excess was determined with HPLC analysis using Diacel Chiracel<sup>®</sup> OJ-3 column, 25% *i*PrOH in *n*hexane, 0.8 mL/min *t*<sub>R</sub>(minor) = 6.17 min, *t*<sub>R</sub>(major) = 11.8 min.

*R*<sub>f</sub> = 0.17 (SiO<sub>2</sub>, hexanes:ethyl acetate = 1:1)

[α]<sub>D</sub><sup>23</sup> = +669.2 (c = 1.00 in CHCl<sub>3</sub>)

*m.p.* = 150 – 151 °C

<sup>1</sup>H NMR (500 MHz, CDCl<sub>3</sub>) δ 7.89 (s, 1H), 7.16 – 7.07 (m, 2H), 6.73 – 6.61 (m, 2H), 6.29 (ddt, J = 9.6, 5.4, 1.5 Hz, 1H), 6.13 (dddd, J = 9.6, 5.4, 1.9, 1.1 Hz, 1H), 5.96 (ddt, J = 9.6, 4.6, 1.1 Hz, 1H), 5.60 (ddt, J = 9.6, 4.8, 1.1 Hz, 1H), 4.95 (ddd, J = 6.7, 4.8, 1.5 Hz, 1H), 3.66 (ddd, J = 6.7, 4.6, 1.9 Hz, 1H), 3.03 (s, 3H), 2.91 (s, 6H).

$^{13}\text{C}$  NMR (126 MHz,  $\text{CDCl}_3$ )  $\delta$  154.9, 153.3, 150.1, 130.8, 128.8, 128.7, 127.2, 122.9, 120.9, 112.9, 57.1, 43.9, 40.8, 25.3.

HRMS (ESI-TOF,  $m/z$ ) calcd. For  $\text{C}_{17}\text{H}_{21}\text{N}_4\text{O}_2$   $[\text{M}+\text{H}]^+$  calc.: 313.1665; Found: 313.1662.

IR (ATR, neat,  $\text{cm}^{-1}$ ): 3040 (w), 2885 (w), 2801 (w), 2247 (w), 1763 (m), 1683 (s), 1613 (m), 1519 (m), 1476 (m).

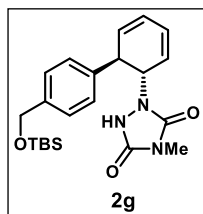

**Synthesis of (+)-2g:** The corresponding compound was prepared following general procedure A. Purification by flash chromatography ( $\text{SiO}_2$ , hexanes:ethyl acetate = 3:1  $\rightarrow$  2:1) afforded the product as a colorless solid [139 mg, 0.34 mmol, 67%, 95.5:4.5 er]. Enantiomeric excess was determined with HPLC analysis using Diacel Chiracel<sup>®</sup> OJ-3 column, 5% *i*PrOH in *n*hexane, 0.8 mL/min  $t_{\text{R}}(\text{minor}) = 8.76$  min,  $t_{\text{R}}(\text{major}) = 12.1$  min.

$R_f = 0.40$  ( $\text{SiO}_2$ , hexanes:ethyl acetate = 1:1)

$[\alpha]_{\text{D}}^{22} = +399.9$  ( $c = 1.00$  in  $\text{CHCl}_3$ )

m.p. = 54 – 56 °C

$^1\text{H}$  NMR (500 MHz,  $\text{CDCl}_3$ )  $\delta$  8.24 (s, 1H), 7.33 – 7.16 (m, 4H), 6.30 (ddt,  $J = 9.6, 5.4, 1.5$  Hz, 1H), 6.16 (dddd,  $J = 9.6, 5.4, 2.0, 1.0$  Hz, 1H), 5.95 (ddt,  $J = 9.5, 4.5, 1.0$  Hz, 1H), 5.61 (ddt,  $J = 9.6, 4.5, 1.0$  Hz, 1H), 4.99 (ddd,  $J = 7.1, 4.5, 1.5$  Hz, 1H), 4.71 (s, 2H), 3.76 (ddd,  $J = 7.1, 4.5, 2.0$  Hz, 1H), 3.02 (s, 3H), 0.93 (s, 9H), 0.09 (s, 6H).

$^{13}\text{C}$  NMR (126 MHz,  $\text{CDCl}_3$ )  $\delta$  155.1, 153.3, 140.8, 138.5, 130.1, 128.8, 127.9, 126.6, 123.3, 121.1, 64.8, 57.0, 44.5, 26.1, 25.3, 18.5, -5.1.

HRMS (ESI-TOF,  $m/z$ ) calcd. For  $\text{C}_{22}\text{H}_{32}\text{N}_3\text{O}_3\text{Si}$   $[\text{M}+\text{H}]^+$  calc.: 414.2213; Found: 414.2207.

IR (ATR, neat,  $\text{cm}^{-1}$ ): 3044 (w), 2953 (w), 2929 (w), 2885 (w), 2856 (w), 1765 (w), 1687 (s), 1471 (m), 1087 (m), 835 (s).

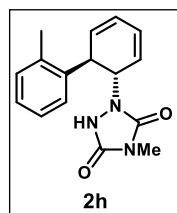

**Synthesis of (+)-2h:** The corresponding compound was prepared following general procedure A. Purification by flash chromatography ( $\text{SiO}_2$ , hexanes:ethyl acetate = 3:1  $\rightarrow$  2:1) afforded the product as a colorless solid [106 mg, 0.374 mmol, 75%, 92:8 er]. Enantiomeric excess was determined with HPLC analysis using Diacel Chiralpak<sup>®</sup> IC-3 column, 15% *i*PrOH in *n*hexane, 0.8 mL/min  $t_{\text{R}}(\text{major}) = 5.86$  min,  $t_{\text{R}}(\text{minor}) = 13.7$  min.

$R_f = 0.18$  ( $\text{SiO}_2$ , hexanes:ethyl acetate = 1:1)

$[\alpha]_D^{23} = +478.1$  ( $c = 1.54$  in  $\text{CHCl}_3$ )

m.p. = 66 – 68 °C

$^1\text{H NMR}$  (500 MHz,  $\text{CDCl}_3$ )  $\delta$  7.54 (s, 1H), 7.22 – 7.18 (m, 1H), 7.18 – 7.09 (m, 3H), 6.36 (ddt,  $J = 9.5, 5.4, 1.2$  Hz, 1H), 6.22 (dddd,  $J = 9.6, 5.4, 1.7, 1.0$  Hz, 1H), 5.94 (ddt,  $J = 9.5, 5.0, 1.0$  Hz, 1H), 5.60 (ddt,  $J = 9.6, 5.4, 1.0$  Hz, 1H), 4.91 (td,  $J = 5.0, 1.2$  Hz, 1H), 3.91 (td,  $J = 5.0, 1.7$  Hz, 1H), 3.05 (s, 3H), 2.43 (s, 3H).

$^{13}\text{C NMR}$  (126 MHz,  $\text{CDCl}_3$ )  $\delta$  154.7, 152.7, 136.6, 136.2, 131.3, 130.0, 128.9, 127.53, 127.51, 126.2, 123.3, 120.2, 54.1, 41.0, 25.4, 20.0.

**HRMS** (ESI-TOF,  $m/z$ ) calcd. For  $\text{C}_{16}\text{H}_{17}\text{N}_3\text{O}_2\text{Na}$   $[\text{M}+\text{Na}]^+$  calc.: 306.1218; Found: 306.1210.

**IR** (ATR, neat,  $\text{cm}^{-1}$ ): 3161 (w), 1765 (m), 1686 (s), 1476 (m), 1399 (w), 1026 (w), 748 (w), 724 (w), 601 (w).

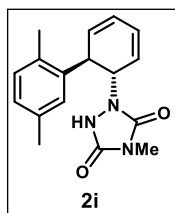

**Synthesis of (+)-2i:** The corresponding compound was prepared following general procedure A. Purification by flash chromatography ( $\text{SiO}_2$ , hexanes:ethyl acetate = 3:1  $\rightarrow$  2:1) afforded the product as a colorless oil [105 mg, 0.353 mmol, 71%, 94:6 er]. Enantiomeric excess was determined with HPLC analysis using Diacel Chiralpak<sup>®</sup> IC-3 column, 15% *i*PrOH in *n*hexane, 0.8 mL/min  $t_R$ (major) = 5.03 min,  $t_R$ (minor) = 9.77 min.

$R_f = 0.23$  ( $\text{SiO}_2$ , hexanes:ethyl acetate = 1:1)

$[\alpha]_D^{23} = +211.5$  ( $c = 1.00$  in  $\text{CHCl}_3$ )

$^1\text{H NMR}$  (500 MHz,  $\text{CDCl}_3$ )  $\delta$  7.31 – 7.28 (m, 1H), 7.09 (d,  $J = 7.7$  Hz, 1H), 6.97 (dd,  $J = 7.7, 1.8$  Hz, 1H), 6.93 (d,  $J = 1.8$  Hz, 1H), 6.36 (ddt,  $J = 9.6, 5.5, 1.2$  Hz, 1H), 6.22 (dddd,  $J = 9.6, 5.5, 1.8, 1.0$  Hz, 1H), 5.93 (ddt,  $J = 9.6, 4.9, 1.2$  Hz, 1H), 5.60 (ddt,  $J = 9.6, 4.9, 1.0$  Hz, 1H), 4.90 (td,  $J = 4.9, 1.2$  Hz, 1H), 3.86 (td,  $J = 4.9, 1.8$  Hz, 1H), 3.05 (s, 3H), 2.37 (s, 3H), 2.26 (s, 3H).

$^{13}\text{C NMR}$  (126 MHz,  $\text{CDCl}_3$ )  $\delta$  154.6, 152.7, 136.5, 135.7, 132.9, 131.2, 130.1, 128.9, 128.2, 128.1, 123.2, 120.1, 54.1, 41.0, 25.4, 21.2, 19.5.

**HRMS** (ESI-TOF,  $m/z$ ) calcd. For  $\text{C}_{17}\text{H}_{19}\text{N}_3\text{O}_2\text{Na}$   $[\text{M}+\text{Na}]^+$  calc.: 320.1375; Found: 320.1367.

**IR** (ATR, neat,  $\text{cm}^{-1}$ ): 3164 (w), 1766 (m), 1693 (s), 1477 (m), 1399 (w), 1277 (w), 1026 (w), 811 (w), 758 (w).

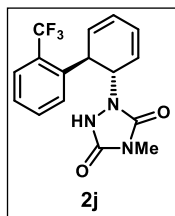

**Synthesis of (+)-2j:** The corresponding compound was prepared following general procedure A. Purification by flash chromatography (SiO<sub>2</sub>, hexanes:ethyl acetate = 3:1 → 2:1) afforded the product as a colorless solid [93 mg, 0.28 mmol, 55%, 91:9 er]. Enantiomeric excess was determined with HPLC analysis using Diacel Chiralpak® IC-3 column, 10% *i*PrOH in *n*hexane, 2.0 mL/min  $t_R$ (minor) = 3.46 min,  $t_R$ (major) = 7.25 min.

$R_f$  = 0.23 (SiO<sub>2</sub>, hexanes:ethyl acetate = 1:1)

$[\alpha]_D^{24}$  = +10.9 ( $c$  = 0.50 in CHCl<sub>3</sub>)

**m.p.** = 98 – 100 °C

**<sup>1</sup>H NMR** (500 MHz, CDCl<sub>3</sub>)  $\delta$  7.71 – 7.58 (m, 1H), 7.50 (d,  $J$  = 1.2 Hz, 1H), 7.49 (d,  $J$  = 1.0 Hz, 1H), 7.40 – 7.32 (m, 1H), 7.09 (s, 1H), 6.35 (ddt,  $J$  = 9.6, 5.6, 1.1 Hz, 1H), 6.13 (dddd,  $J$  = 9.6, 5.6, 2.0, 0.8 Hz, 1H), 5.86 (ddt,  $J$  = 9.6, 4.8, 1.1 Hz, 1H), 5.67 (ddt,  $J$  = 9.6, 4.8, 1.1 Hz, 1H), 5.08 (ddd,  $J$  = 6.1, 4.8, 1.5 Hz, 1H), 4.09 – 4.01 (m, 1H), 3.05 (s, 3H).

**<sup>13</sup>C NMR** (126 MHz, CDCl<sub>3</sub>)  $\delta$  155.0, 153.5, 139.5, 132.6, 129.5, 129.3, 128.4, 128.1 (q,  $J$  = 29.6 Hz) 127.6, 126.3 (q,  $J$  = 5.8 Hz), 125.6 (q,  $J$  = 274.0 Hz) 122.5, 120.9, 55.4, 39.9 (q,  $J$  = 1.6 Hz), 25.4.

**<sup>19</sup>F NMR** (471 MHz, CDCl<sub>3</sub>)  $\delta$  -58.11 (s).

**HRMS** (ESI-TOF,  $m/z$ ) calcd. For C<sub>16</sub>H<sub>14</sub>N<sub>3</sub>O<sub>2</sub>NaF<sub>3</sub> [M+Na]<sup>+</sup> calc.: 360.0936; Found: 360.0936.

**IR** (ATR, neat, cm<sup>-1</sup>): 3148 (w), 1770 (w), 1697 (s), 1478 (m), 1312 (m), 1157 (w), 1115 (m), 765 (m).

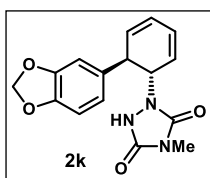

**Synthesis of (+)-2k:** The corresponding compound was prepared following general procedure A. Purification by flash chromatography (SiO<sub>2</sub>, hexanes:ethyl acetate = 3:1 → 2:1) afforded the product as a colorless solid [116 mg, 0.37 mmol, 74%, 97:3 er]. Enantiomeric excess was determined with HPLC analysis using Diacel Chiralcel® OJ-3 column, 25% *i*PrOH in *n*hexane, 0.8 mL/min  $t_R$ (minor) = 11.6 min,  $t_R$ (major) = 13.3 min.

### 53.1 mmol scale reaction:

In an oven-dried media bottle, MTAD (**1**, 6.00 g, 53.1 mmol, 1.0 equiv.) was dissolved in anhydrous CH<sub>2</sub>Cl<sub>2</sub> (265 mL) under nitrogen atmosphere and cooled to -78 °C. Benzene (47.3 mL, 531 mmol, 10 equiv.) was slowly added and the solution was stirred for five minutes. The pink solution was irradiated with LED lights at -78 °C until complete loss of color. Upon decolorization, the LED lights were turned off and a pre-cooled (-78 °C) solution of [Ni(acac)<sub>2</sub>] (204 mg, 0.796 mmol, 1.5 mol %) and (*R,R*)-*i*Pr-Phosferrox (510 mg, 1.06 mmol, 2.0 mol %) in CH<sub>2</sub>Cl<sub>2</sub> (32 mL) was added, followed by dropwise addition of freshly prepared Grignard reagent (44.2 mL, 3.0 M in Et<sub>2</sub>O, 133 mmol, 2.5 equiv.) at the rate to keep the internal temperature below

–65 °C. After addition, the cold bath temperature was warmed to –45 °C and allowed to slowly warm to 0 °C over 3 h. Reaction vessel was removed from the cold bath, stirred at room temperature for 15 min, and then quenched with aq. HCl (200 mL, 1M). The organic phase was separated, and the aqueous phase was extracted with CH<sub>2</sub>Cl<sub>2</sub> (2 × 200 mL). The combined organic extracts were dried over MgSO<sub>4</sub>, filtered, loaded onto silica and concentrated under reduced pressure. Purification by flash chromatography (CH<sub>2</sub>Cl<sub>2</sub>, SiO<sub>2</sub>, hexanes:ethyl acetate = 3:1 → 2:1) afforded the product as a colorless solid [11.29 g, 36.0 mmol, 68%, 97:3 er].

*R<sub>f</sub>* = 0.2 (SiO<sub>2</sub>, hexanes:ethyl acetate = 1:1)

[α]<sub>D</sub><sup>23</sup> = +475.9 (c = 1.00 in CHCl<sub>3</sub>)

*m.p.* = 160 – 161 °C

<sup>1</sup>H NMR (500 MHz, CDCl<sub>3</sub>) δ 8.30 (s, 1H), 6.76 (d, J = 1.2 Hz, 1H), 6.72 (d, J = 1.2 Hz, 2H), 6.28 (ddt, J = 9.6, 5.4, 1.4 Hz, 1H), 6.13 (dddd, J = 9.6, 5.4, 2.0, 1.0 Hz, 1H), 5.96 – 5.88 (m, 3H), 5.60 (ddt, J = 9.6, 4.5, 1.0 Hz, 1H), 4.94 (ddd, J = 7.6, 4.5, 1.7 Hz, 1H), 3.68 (ddd, J = 7.6, 4.5, 2.0 Hz, 1H), 3.03 (s, 3H).

<sup>13</sup>C NMR (126 MHz, CDCl<sub>3</sub>) δ 155.1, 153.3, 148.0, 147.0, 133.9, 130.1, 128.7, 123.3, 121.3, 121.1, 108.5, 108.4, 101.2, 57.3, 44.5, 25.3.

HRMS (ESI-TOF, *m/z*) calcd. For C<sub>16</sub>H<sub>15</sub>N<sub>3</sub>O<sub>4</sub> [M]<sup>+</sup> calc.:313.1063; Found: 313.1071

IR (ATR, neat, cm<sup>-1</sup>): 3452 (w), 3158 (w), 2891 (w), 1765 (w), 1689 (s), 1502 (m), 1483 (m), 1246 (m), 1037 (m).

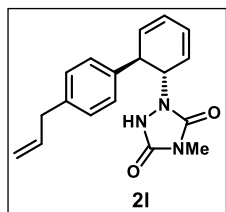

**Synthesis of (+)-21:** The corresponding compound was prepared following general procedure A. Purification by flash chromatography (SiO<sub>2</sub>, hexanes:ethyl acetate = 3:1 → 2:1) afforded the product as a colorless oil [90.0 mg, 0.29 mmol, 58%, 94:6 er]. Enantiomeric excess was determined with HPLC analysis using Diacel Chiralpak<sup>®</sup> IC-3 column, 15% *i*PrOH in *n*hexane, 0.8 mL/min *t<sub>R</sub>*(major) = 3.90 min, *t<sub>R</sub>*(minor) = 6.33 min.

*R<sub>f</sub>* = 0.36 (SiO<sub>2</sub>, hexanes:ethyl acetate = 1:1)

[α]<sub>D</sub><sup>23</sup> = +362.6 (c = 1.00 in CHCl<sub>3</sub>)

<sup>1</sup>H NMR (500 MHz, CDCl<sub>3</sub>) δ 7.25 (s, 1H), 7.19 (d, J = 8.2 Hz, 1H), 7.13 (d, J = 8.2 Hz, 2H), 6.32 (ddt, J = 9.6, 5.4, 1.5 Hz, 1H), 6.18 (dddd, J = 9.6, 5.4, 1.9, 1.0 Hz, 1H), 6.00 – 5.89 (m, 2H), 5.61 (ddt, J = 9.6, 4.8, 1.0 Hz, 1H), 5.07 (dq, J = 8.0, 1.6 Hz, 1H), 5.05 (t, J = 1.5 Hz, 1H), 4.96 (ddd, J = 6.5, 4.8, 1.6 Hz, 1H), 3.71 (ddd, J = 6.5, 4.8, 1.9 Hz, 1H), 3.39 – 3.32 (m, 2H), 3.03 (s, 3H).

<sup>13</sup>C NMR (126 MHz, CDCl<sub>3</sub>) δ 154.8, 153.3, 139.5, 137.4, 137.4, 130.2, 129.1, 129.0, 128.1, 123.2, 120.7, 116.0, 56.7, 44.5, 40.0, 25.4.

**HRMS** (ESI-TOF,  $m/z$ ) calcd. For  $C_{18}H_{20}N_3O_2$   $[M+H]^+$  calc.: 310.1556; Found: 310.1556.

**IR** (ATR, neat,  $cm^{-1}$ ): 3044 (w), 1766 (w), 1682 (s), 1474 (m), 1398 (w), 1023 (w), 753 (m), 606 (w).

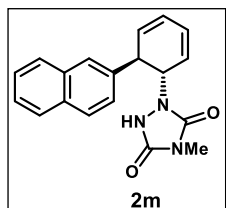

**Synthesis of (+)-2m:** The corresponding compound was prepared following general procedure **A**. Purification by flash chromatography ( $SiO_2$ , hexanes:ethyl acetate = 3:1  $\rightarrow$  2:1) afforded the product as a colorless solid [120 mg, 0.37 mmol, 75%, 94:6 er]. Enantiomeric excess was determined with HPLC analysis using Diacel Chiralpak<sup>®</sup> IC-3 column, 25% *i*PrOH in *n*hexane, 0.8 mL/min  $t_R$ (minor) = 8.27 min,  $t_R$ (major) = 5.09 min.

$R_f$  = 0.33 ( $SiO_2$ , hexanes:ethyl acetate = 1:1)

$[\alpha]_D^{22}$  = +409.7 ( $c$  = 1.00 in  $CHCl_3$ )

**m.p.** = 85 – 86 °C

**$^1H$  NMR** (500 MHz,  $CDCl_3$ )  $\delta$  7.85 – 7.74 (m, 3H), 7.70 – 7.64 (m, 1H), 7.59 – 7.53 (m, 1H), 7.47 – 7.41 (m, 3H), 6.37 (ddt,  $J$  = 9.6, 5.4, 1.1 Hz, 1H), 6.25 (dddd,  $J$  = 9.6, 5.4, 1.9, 1.0 Hz, 1H), 6.06 (ddt,  $J$  = 9.6, 4.7, 1.1 Hz, 1H), 5.65 (ddt,  $J$  = 9.6, 4.7, 1.0 Hz, 1H), 5.09 (ddd,  $J$  = 6.5, 4.7, 1.8 Hz, 1H), 3.92 (ddd,  $J$  = 6.5, 4.7, 1.8 Hz, 1H), 3.00 (s, 3H).

**$^{13}C$  NMR** (126 MHz,  $CDCl_3$ )  $\delta$  154.9, 153.4, 137.1, 133.5, 132.9, 129.9, 129.0, 128.9, 127.9, 127.8, 126.7, 126.3, 126.3, 126.1, 123.6, 120.8, 56.6, 45.0, 25.4.

**HRMS** (ESI-TOF,  $m/z$ ) calcd. For  $C_{19}H_{18}N_3O_2$   $[M+H]^+$  calc.: 320.1399; Found: 320.1408.

**IR** (ATR, neat,  $cm^{-1}$ ): 3048 (w), 2923 (m), 2853 (w), 1765 (w), 1683 (s), 1470 (m), 818 (m), 743 (m), 606 (m), 476 (m).

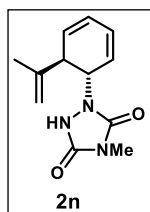

**Synthesis of (+)-2n:** The corresponding compound was prepared following general procedure **A**. Purification by flash chromatography ( $SiO_2$ , hexanes:ethyl acetate = 3:1  $\rightarrow$  2:1) afforded the product as a colorless oil [64.0 mg, 0.27 mmol, 55%, 89:11 er]. Enantiomeric excess was determined with HPLC analysis using Diacel Chiralcel<sup>®</sup> OJ-3 column, 5% *i*PrOH in *n*hexane, 2.0 mL/min  $t_R$ (minor) = 4.9 min,  $t_R$ (major) = 6.4 min.

$R_f$  = 0.24 ( $SiO_2$ , hexanes:ethyl acetate = 1:1)

$[\alpha]_D^{24}$  = +188.9 ( $c$  = 1.00 in  $CHCl_3$ )



**$^1\text{H}$  NMR** (500 MHz,  $\text{CDCl}_3$ )  $\delta$  7.80 (s, 1H), 6.24 – 6.12 (m, 1H), 6.02 (dddd,  $J = 9.7, 5.3, 2.2, 0.9$  Hz, 1H), 5.74 (ddt,  $J = 9.7, 4.2, 1.1$  Hz, 1H), 5.62 (ddt,  $J = 9.7, 4.2, 1.1$  Hz, 1H), 4.96 (ddd,  $J = 9.0, 4.2, 1.9$  Hz, 1H), 4.86 – 4.76 (m, 2H), 3.25 – 3.16 (m, 1H), 3.06 (s, 3H), 1.79 (dd,  $J = 1.5, 0.9$  Hz, 3H).

**$^{13}\text{C}$  NMR** (126 MHz,  $\text{CDCl}_3$ )  $\delta$  155.1, 153.5, 143.3, 129.6, 128.2, 123.2, 122.2, 113.9, 53.5, 46.6, 25.4, 20.2.

**HRMS** (ESI-TOF,  $m/z$ ) calcd. For  $\text{C}_{12}\text{H}_{15}\text{BrN}_3\text{O}_2$   $[\text{M}+\text{Br}]^-$  calc.: 312.0353; Found: 312.0361.

**IR** (ATR, neat,  $\text{cm}^{-1}$ ): 3167 (w), 1768 (w), 1692 (s), 1476 (m), 1397 (w), 1024 (w), 763 (w), 608 (w).

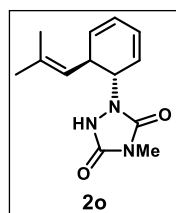

**Synthesis of (+)-2o:** The corresponding compound was prepared following general procedure A. Purification by flash chromatography ( $\text{SiO}_2$ , hexanes:ethyl acetate = 3:1  $\rightarrow$  2:1) afforded the product as a colorless oil [65.0 mg, 0.26 mmol, 53%, 97.5:2.5 er]. Enantiomeric excess was determined with HPLC analysis using Diacel Chiralpak<sup>®</sup> IC-3 column, 15% *i*PrOH in *n*hexane, 0.8 mL/min  $t_{\text{R}}$ (major) = 5.4 min,  $t_{\text{R}}$ (minor) = 9.2 min.

$R_{\text{f}} = 0.32$  ( $\text{SiO}_2$ , hexanes:ethyl acetate = 1:1)

$[\alpha]_{\text{D}}^{23} = +555.0$  ( $c = 1.00$  in  $\text{CHCl}_3$ )

**$^1\text{H}$  NMR** (500 MHz,  $\text{C}_6\text{D}_6$ )  $\delta$  8.99 (s, 1H), 5.90 (dddd,  $J = 9.6, 5.3, 2.1, 1.2$  Hz, 1H), 5.71 (dddd,  $J = 9.6, 5.3, 2.1, 1.0$  Hz, 1H), 5.63 (ddt,  $J = 9.6, 4.1, 1.2$  Hz, 1H), 5.55 (ddt,  $J = 9.6, 4.1, 1.0$  Hz, 1H), 5.11 (dp,  $J = 9.8, 1.5$  Hz, 1H), 4.94 (ddd,  $J = 9.7, 4.1, 2.1$  Hz, 1H), 3.54 (tdd,  $J = 9.7, 4.1, 2.1$  Hz, 1H), 2.67 (s, 3H), 1.56 (d,  $J = 1.5$  Hz, 3H), 1.54 (d,  $J = 1.5$  Hz, 3H).

**$^{13}\text{C}$  NMR** (126 MHz,  $\text{C}_6\text{D}_6$ )  $\delta$  155.8, 154.1, 135.1, 131.1, 128.4, 124.2, 123.2, 122.7, 56.7, 38.4, 25.8, 24.8, 18.0.

**HRMS** (ESI-TOF,  $m/z$ ) calcd. For  $\text{C}_{13}\text{H}_{17}\text{ClN}_3\text{O}_2$   $[\text{M}+\text{Cl}]^-$  calc.: 282.1015; Found: 282.1023.

**IR** (ATR, neat,  $\text{cm}^{-1}$ ): 3157 (w), 1762 (w), 1682 (s), 1476 (m), 1375 (w), 1016 (w), 763 (m), 716 (m).

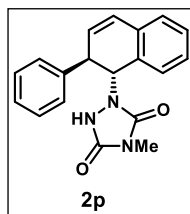

**Synthesis of (+)-2p:** The corresponding compound was prepared following general procedure A employing the commercially available 3.0M Grignard reagent in  $\text{Et}_2\text{O}$ . Naphthalene was employed in 2.0 equivalents and the cycloaddition was run in 5.0 mL  $\text{CH}_2\text{Cl}_2$ . Purification by flash chromatography ( $\text{SiO}_2$ , hexanes:ethyl acetate = 3:1  $\rightarrow$  2:1) afforded the product as a colorless solid [100 mg, 0.31 mmol, 63%, 94.5:5.5 er]. Enantiomeric excess was determined with HPLC analysis using Diacel Chiralcel<sup>®</sup> OJ-3 column, 25% *i*PrOH in *n*hexane, 0.8 mL/min  $t_{\text{R}}$ (minor) = 8.5 min,  $t_{\text{R}}$ (major) = 12.3 min.

$R_f = 0.37$  (SiO<sub>2</sub>, hexanes:ethyl acetate = 1:1)

$[\alpha]_D^{21} = +200.4$  (c = 1.00 in CHCl<sub>3</sub>)

m.p. = 140 – 142 °C

**<sup>1</sup>H NMR** (500 MHz, CDCl<sub>3</sub>)  $\delta$  7.50 – 7.41 (m, 1H), 7.36 – 7.18 (m, 9H), 6.69 (dd,  $J = 9.6, 2.2$  Hz, 1H), 6.09 (dd,  $J = 9.6, 3.8$  Hz, 1H), 5.66 – 5.56 (m, 1H), 4.07 (ddd,  $J = 8.7, 3.8, 2.2$  Hz, 1H), 2.90 (s, 3H).

**<sup>13</sup>C NMR** (126 MHz, CDCl<sub>3</sub>)  $\delta$  154.8, 154.0, 139.9, 134.1, 130.3, 130.2, 129.2, 128.8, 128.6, 128.4, 127.9, 127.8, 127.1, 126.6, 60.8, 45.4, 25.2.

**HRMS** (ESI-TOF, m/z) calcd. For C<sub>19</sub>H<sub>18</sub>N<sub>3</sub>O<sub>2</sub> [M+H]<sup>+</sup> calc.: 320.1399; Found: 320.1400.

**IR** (ATR, neat, cm<sup>-1</sup>): 3063.83 (w), 1763 (w), 1689 (s), 1479 (m), 1452 (w), 1279 (w), 1225 (w), 732 (w).

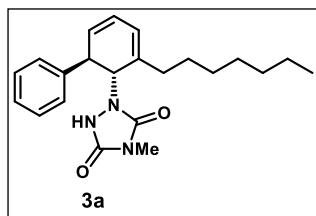

**Synthesis of (±)-3a:** The corresponding compound was prepared following general procedure **B** employing the commercially available 3.0M Grignard reagent in Et<sub>2</sub>O. Purification by flash chromatography (SiO<sub>2</sub>, hexanes:ethyl acetate = 3:1 → 2:1) afforded the product as a colorless oil [96.0 mg, 0.26 mmol, 52%].

$R_f = 0.48$  (SiO<sub>2</sub>, hexanes:ethyl acetate = 1:1)

**<sup>1</sup>H NMR** (500 MHz, CDCl<sub>3</sub>)  $\delta$  7.32 – 7.27 (m, 2H), 7.25 – 7.21 (m, 3H), 7.18 (d,  $J = 5.5$  Hz, 1H), 6.21 (ddd,  $J = 9.5, 5.5, 1.2$  Hz, 1H), 6.10 (dq,  $J = 5.9, 1.2$  Hz, 1H), 5.89 (dd,  $J = 9.5, 5.5$  Hz, 1H), 4.75 (d,  $J = 2.4$  Hz, 1H), 3.77 – 3.51 (m, 1H), 3.10 (s, 3H), 2.06 – 1.79 (m, 2H), 1.40 – 1.00 (m, 10H), 0.84 (t,  $J = 7.3$  Hz, 3H).

**<sup>13</sup>C NMR** (126 MHz, CDCl<sub>3</sub>)  $\delta$  154.2, 152.7, 139.1, 132.5, 128.9, 127.9, 127.5, 126.6, 124.0, 123.8, 57.8, 45.6, 34.4, 31.8, 29.1, 29.0, 27.3, 25.4, 22.7, 14.2.

**HRMS** (ESI-TOF, m/z) calcd. For C<sub>24</sub>H<sub>29</sub>F<sub>3</sub>N<sub>3</sub>O<sub>4</sub> [M+CF<sub>3</sub>COO]<sup>-</sup> calc.: 480.2116; Found: 480.2115.

**IR** (ATR, neat, cm<sup>-1</sup>): 2926 (w), 2855 (w), 1765 (w), 1690 (s), 1468 (m), 1397 (w), 1222 (w), 1026 (w).

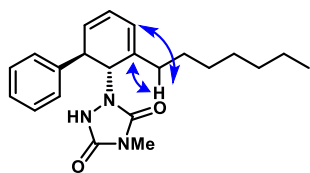

HMBC correlations

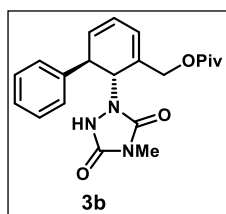

**Synthesis of (±)-3b:** The corresponding compound was prepared following general procedure **B** employing the commercially available 3.0M Grignard reagent in Et<sub>2</sub>O. <sup>1</sup>H NMR analysis of the crude reaction mixture showed a ratio of constitutional isomers of 9:1. Purification by flash chromatography (SiO<sub>2</sub>, hexanes:ethyl acetate = 4:1 → 2:1) afforded the product as a colorless solid of an inseparable mixture of constitutional isomers [110 mg, 0.29 mmol, 57%].

*R<sub>f</sub>* = 0.31 (SiO<sub>2</sub>, hexanes:ethyl acetate = 1:1)

*m.p.* = 87 – 89 °C

<sup>1</sup>H NMR (500 MHz, CDCl<sub>3</sub>) δ 7.31 – 7.27 (m, 2H), 7.26 – 7.21 (m, 3H), 6.35 – 6.31 (m, 1H), 6.21 (ddd, *J* = 9.6, 5.6, 1.4 Hz, 1H), 5.99 (dd, *J* = 9.6, 5.2 Hz, 1H), 4.87 (d, *J* = 4.0 Hz, 1H), 4.59 (d, *J* = 13.5 Hz, 1H), 4.44 (d, *J* = 13.5 Hz, 1H), 3.76 – 3.69 (m, 1H), 3.06 (s, 3H), 1.09 (s, 9H).

<sup>13</sup>C NMR (126 MHz, CDCl<sub>3</sub>) δ 178.6, 154.9, 153.4, 139.1, 129.7, 129.0, 128.0, 127.7, 126.9, 126.8, 122.7, 64.4, 56.8, 45.3, 39.0, 27.2, 25.4.

HRMS (ESI-TOF, *m/z*) calcd. For C<sub>21</sub>H<sub>29</sub>N<sub>4</sub>O<sub>4</sub> [M+NH<sub>4</sub>]<sup>+</sup> calc.: 401.2183; Found: 401.2186.

IR (ATR, neat, cm<sup>-1</sup>): 3061 (w), 2972 (w), 1766 (w), 1688 (s), 1477 (m), 1143 (m), 762 (m), 728 (m).

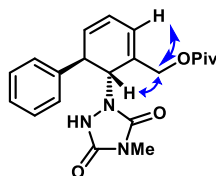

HMBC correlations

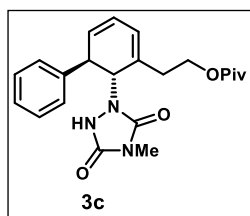

**Synthesis of (±)-3c:** The corresponding compound was prepared following general procedure **B** employing the commercially available 3.0M Grignard reagent in Et<sub>2</sub>O. <sup>1</sup>H NMR analysis of the crude reaction mixture showed a ratio of constitutional isomers of 11:1. Purification by flash chromatography (SiO<sub>2</sub>, hexanes:ethyl acetate = 4:1 → 2:1) afforded the product as a colorless solid of an inseparable mixture of constitutional isomers [111 mg, 0.28 mmol, 56%].

$R_f = 0.20$  (SiO<sub>2</sub>, hexanes:ethyl acetate = 1:1)

**m.p.** = 76 – 78 °C

**<sup>1</sup>H NMR** (500 MHz, CDCl<sub>3</sub>)  $\delta$  7.53 (s, 1H), 7.42 – 7.09 (m, 5H), 6.21 – 6.06 (m, 2H), 6.00 – 5.86 (m, 1H), 4.85 (d,  $J = 4.1$  Hz, 1H), 4.18 (dtd,  $J = 12.9, 7.0, 4.1$  Hz, 1H), 4.03 – 3.93 (m, 1H), 3.69 – 3.60 (m, 1H), 3.08 (s, 3H), 2.41 – 2.34 (m, 2H), 1.14 (s, 9H).

**<sup>13</sup>C NMR** (126 MHz, CDCl<sub>3</sub>)  $\delta$  178.8, 154.4, 153.5, 139.4, 129.0, 128.3, 128.1, 127.9, 127.6, 126.4, 122.9, 62.3, 59.1, 45.6, 38.9, 34.3, 27.3, 25.4.

**HRMS** (ESI-TOF,  $m/z$ ) calcd. For C<sub>24</sub>H<sub>27</sub>F<sub>3</sub>N<sub>3</sub>O<sub>6</sub> [M+CF<sub>3</sub>COO]<sup>-</sup> calc.: 510.1857; Found: 510.1839.

**IR** (ATR, neat, cm<sup>-1</sup>): 2973 (w), 1698 (s), 1590 (w), 1479 (m), 1378 (w), 1284 (w), 1156 (m), 1035 (w).

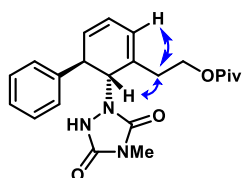

HMBC correlations

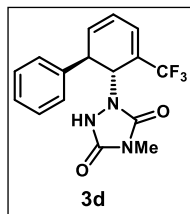

**Synthesis of ( $\pm$ )-3d:** The corresponding compound was prepared following general procedure **B** employing the commercially available 3.0M Grignard reagent in Et<sub>2</sub>O. Purification by flash chromatography (SiO<sub>2</sub>, hexanes:ethyl acetate = 4:1  $\rightarrow$  2:1) afforded the product as a colorless solid [66.0 mg, 0.196 mmol, 39%].

$R_f = 0.26$  (SiO<sub>2</sub>, hexanes:ethyl acetate = 1:1)

**m.p.** = 60 – 62 °C

**<sup>1</sup>H NMR** (500 MHz, CDCl<sub>3</sub>)  $\delta$  7.53 (s, 1H), 7.37 – 7.27 (m, 3H), 7.22 – 7.18 (m, 2H), 6.98 – 6.93 (m, 1H), 6.36 (ddt,  $J = 9.6, 5.7, 1.0$  Hz, 1H), 6.29 (dd,  $J = 9.6, 5.3$  Hz, 1H), 5.15 (d,  $J = 2.8$  Hz, 1H), 3.85 – 3.75 (m, 1H), 3.08 (s, 3H).

**<sup>13</sup>C NMR** (126 MHz, CDCl<sub>3</sub>)  $\delta$  155.1, 153.2, 137.2, 134.3, 131.4 (q,  $J = 5.9$  Hz), 129.3, 128.2, 127.7, 123.1 (q,  $J = 271.8$  Hz), 121.3, 119.5 (q,  $J = 31.4$  Hz), 53.1, 46.0, 25.5.

**<sup>19</sup>F NMR** (471 MHz, CDCl<sub>3</sub>)  $\delta$  -67.0.

**HRMS** (ESI-TOF,  $m/z$ ) calcd. For  $C_{18}H_{14}F_6N_3O_4$   $[M+CF_3COO]^-$  calc.: 450.0894; Found: 450.0911.

**IR** (ATR, neat,  $cm^{-1}$ ): 3617 (w), 1766 (w), 1697 (s), 1479 (m), 1308 (m), 1168 (m), 1116 (m), 728 (m).

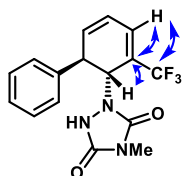

HMBC correlations

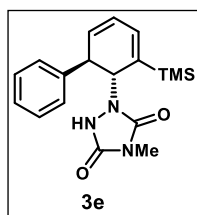

**Synthesis of ( $\pm$ )-3e:** The corresponding compound was prepared following general procedure **B** employing the commercially available 3.0M Grignard reagent in  $Et_2O$ . Purification by flash chromatography ( $SiO_2$ , hexanes:ethyl acetate = 4:1  $\rightarrow$  2:1) afforded the product as a colorless solid [93.0 mg, 0.27 mmol, 54%].

$R_f$  = 0.56 ( $SiO_2$ , hexanes:ethyl acetate = 1:1)

**m.p.** = 139 – 140 °C

**$^1H$  NMR** (500 MHz,  $CDCl_3$ )  $\delta$  7.35 – 7.15 (m, 5H), 6.65 (dt,  $J$  = 5.3, 1.0 Hz, 1H), 6.31 (ddd,  $J$  = 9.6, 5.3, 1.3 Hz, 1H), 6.10 (ddt,  $J$  = 9.5, 5.4, 1.0 Hz, 1H), 5.01 (dt,  $J$  = 2.8, 1.0 Hz, 1H), 3.64 (ddd,  $J$  = 5.4, 2.8, 1.3 Hz, 1H), 3.11 (s, 3H), 0.00 (s, 9H).

**$^{13}C$  NMR** (126 MHz,  $CDCl_3$ )  $\delta$  154.1, 152.1, 138.7, 136.7, 132.1, 130.5, 128.8, 127.9, 127.5, 123.8, 56.0, 44.8, 25.4, -2.2.

**HRMS** (ESI-TOF,  $m/z$ ) calcd. For  $C_{18}H_{24}N_3O_2Si$   $[M+H]^+$  calc.: 342.1638; Found: 342.1649.

**IR** (ATR, neat,  $cm^{-1}$ ): 3028 (w), 2954 (w), 1762 (w), 1690 (s), 1478 (m), 1398 (w), 1248 (w), 838 (m).

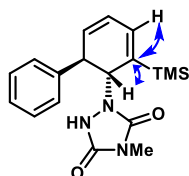

HMBC correlations

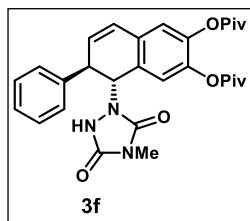

**Synthesis of (±)-3f:** The corresponding compound was prepared following general procedure C employing the commercially available 3.0M Grignard reagent in Et<sub>2</sub>O. Purification by flash chromatography (SiO<sub>2</sub>, hexanes:ethyl acetate = 4:1 → 2:1) afforded the product as a colorless solid [114 mg, 0.22 mmol, 44%].

*R<sub>f</sub>* = 0.49 (SiO<sub>2</sub>, hexanes:ethyl acetate = 1:1)

**m.p.** = 128 – 129 °C

**<sup>1</sup>H NMR** (500 MHz, CDCl<sub>3</sub>) δ 7.97 (s, 1H), 7.34 – 7.22 (m, 5H), 7.04 (s, 1H), 7.00 (s, 1H), 6.59 (dd, *J* = 9.7, 2.3 Hz, 1H), 6.08 (dd, *J* = 9.7, 3.5 Hz, 1H), 5.61 (dd, *J* = 9.7, 1.2 Hz, 1H), 4.09 (dt, *J* = 9.7, 2.9 Hz, 1H), 2.86 (d, *J* = 1.2 Hz, 3H), 1.35 (d, *J* = 1.4 Hz, 9H), 1.33 (d, *J* = 1.4 Hz, 9H).

**<sup>13</sup>C NMR** (126 MHz, CDCl<sub>3</sub>) δ 175.8, 175.7, 154.8, 154.3, 142.7, 142.0, 139.6, 132.4, 131.2, 128.8, 128.7, 128.3, 127.8, 126.4, 121.63, 121.60, 60.7, 44.8, 39.2, 39.1, 27.2, 27.2, 25.0.

**HRMS** (ESI-TOF, *m/z*) calcd. For C<sub>29</sub>H<sub>34</sub>N<sub>3</sub>O<sub>6</sub> [M+H]<sup>+</sup> calc.: 520.2448; Found: 520.2456.

**IR** (ATR, neat, cm<sup>-1</sup>): 2974 (w), 2873 (w), 1759 (m), 1697 (s), 1479 (m), 1397 (w), 1273 (m), 1108 (s), 731 (m).

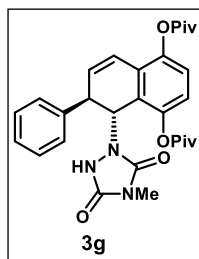

**Synthesis of (±)-3g:** The corresponding compound was prepared following general procedure C employing the commercially available 3.0M Grignard reagent in Et<sub>2</sub>O. Purification by flash chromatography (SiO<sub>2</sub>, hexanes:ethyl acetate = 4:1 → 2:1) afforded the product as a colorless solid [120 mg, 0.23 mmol, 46%].

*R<sub>f</sub>* = 0.54 (SiO<sub>2</sub>, hexanes:ethyl acetate = 1:1)

**m.p.** = 101 – 103 °C

**<sup>1</sup>H NMR** (500 MHz, CDCl<sub>3</sub>) δ 7.32 – 7.17 (m, 5H), 7.09 (d, *J* = 8.8 Hz, 1H), 6.88 (d, *J* = 8.8 Hz, 1H), 6.78 (dd, *J* = 9.9, 1.1 Hz, 1H), 6.23 (ddd, *J* = 9.9, 6.0, 1.1 Hz, 1H), 5.52 (t, *J* = 1.1 Hz, 1H), 3.77 (d, *J* = 6.0 Hz, 1H), 3.10 (s, 3H), 1.46 (s, 9H), 1.29 (s, 9H).

**<sup>13</sup>C NMR** (126 MHz, CDCl<sub>3</sub>) δ 177.6, 176.6, 154.8, 153.1, 147.3, 144.2, 138.2, 130.1, 129.0, 128.1, 127.8, 127.4, 124.0, 122.9, 120.7, 120.0, 53.3, 44.9, 39.4, 39.3, 27.3, 27.0, 25.3.

**HRMS** (ESI-TOF, *m/z*) calcd. For C<sub>29</sub>H<sub>34</sub>N<sub>3</sub>O<sub>6</sub> [M+H]<sup>+</sup> calc.: 520.2448; Found: 520.2437.

**IR** (ATR, neat, cm<sup>-1</sup>): 3227 (w), 2975 (w), 1750 (m), 1703 (s), 1472 (m), 1221 (w), 1103 (s), 906 (w).

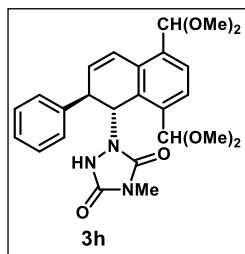

**Synthesis of (±)-3h:** The corresponding compound was prepared following general procedure C employing the commercially available 3.0M Grignard reagent in Et<sub>2</sub>O. The reaction was quenched with NH<sub>4</sub>Cl (2.0 mL). Purification by flash chromatography (SiO<sub>2</sub>, hexanes:ethyl acetate = 4:1 → 2:1) afforded the product as a colorless solid [115 mg, 0.25 mmol, 49%].

*R<sub>f</sub>* = 0.11 (SiO<sub>2</sub>, hexanes:ethyl acetate = 1:1)

**m.p.** = 141 – 143 °C

**<sup>1</sup>H NMR** (500 MHz, C<sub>6</sub>D<sub>6</sub>) δ 7.72 (d, *J* = 8.2 Hz, 1H), 7.65 (d, *J* = 8.2 Hz, 1H), 7.63 (s, 1H), 7.35 (dd, *J* = 9.9, 0.8 Hz, 1H), 7.31 – 7.26 (m, 2H), 7.02 – 6.96 (m, 2H), 6.95 – 6.89 (m, 1H), 6.35 (t, *J* = 1.4 Hz, 1H), 5.97 (ddd, *J* = 9.9, 6.0, 1.4 Hz, 1H), 5.67 (s, 1H), 5.62 (s, 1H), 3.82 – 3.74 (m, 1H), 3.19 (s, 3H), 3.10 (s, 3H), 3.09 (s, 3H), 2.73 (s, 3H), 2.58 (s, 3H).

**<sup>13</sup>C NMR** (126 MHz, C<sub>6</sub>D<sub>6</sub>) δ 154.9, 153.5, 138.2, 134.0, 132.7, 128.8, 128.7, 128.5, 128.4, 128.0, 127.3, 127.01, 126.96, 125.8, 101.3, 100.4, 54.9, 53.7, 52.9, 51.8, 50.7, 45.4, 24.8.

**HRMS** (ESI-TOF, *m/z*) calcd. For C<sub>25</sub>H<sub>29</sub>N<sub>3</sub>O<sub>6</sub>Na [M+Na]<sup>+</sup> calc.: 490.1954; Found: 490.1945.

**IR** (ATR, neat, cm<sup>-1</sup>): 2935 (w), 2829 (w), 1764 (w), 1692 (s), 1475 (m), 1398 (w), 1190 (m), 1111 (m), 1051 (m).

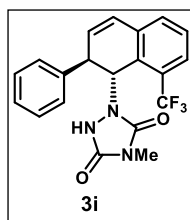

**Synthesis of (±)-3i:** The corresponding compound was prepared following general procedure C employing the commercially available 3.0M Grignard reagent in Et<sub>2</sub>O. <sup>1</sup>H NMR analysis of the crude reaction mixture showed a ratio of constitutional isomers of 9:1. Purification by flash chromatography (SiO<sub>2</sub>, hexanes:ethyl acetate = 3:1 → 2:1) afforded the product as a colorless solid [145 mg, 0.37 mmol, 75%]. Complete purging of the constitutional isomer for analysis was achieved by recrystallization from Et<sub>2</sub>O:Hexanes.

*R<sub>f</sub>* = 0.30 (SiO<sub>2</sub>, hexanes:ethyl acetate = 1:1)

**m.p.** = 177 – 179 °C

**<sup>1</sup>H NMR** (500 MHz, CDCl<sub>3</sub>) δ 7.54 (dd, *J* = 7.5, 1.7 Hz, 1H), 7.49 – 7.45 (m, 1H), 7.44 (dd, *J* = 7.8, 1.8 Hz, 1H), 7.24 – 7.18 (m, 3H), 7.15 (dd, *J* = 7.8, 1.8 Hz, 2H), 6.87 (dd, *J* = 9.7, 1.0 Hz, 1H), 6.30 (ddd, *J* = 9.7, 6.0, 1.0 Hz, 1H), 5.80 (t, *J* = 1.3 Hz, 1H), 3.98 (dd, *J* = 6.0, 1.3 Hz, 1H), 3.08 (s, 3H).

**<sup>13</sup>C NMR** (126 MHz, CDCl<sub>3</sub>) δ 154.8, 153.1, 136.7, 135.8, 130.7, 130.5, 129.9, 129.0, 127.8, 127.73, 127.67, 126.1 (q, *J* = 5.8 Hz), 125.2, 124.7, 122.5, 55.8, 46.1, 25.4.

**<sup>19</sup>F NMR** (471 MHz, CDCl<sub>3</sub>) δ -64.3.

**HRMS** (ESI-TOF,  $m/z$ ) calcd. For  $C_{20}H_{17}N_3O_2F_3$   $[M+H]^+$  calc.: 388.1273; Found: 388.1261.

**IR** (ATR, neat,  $cm^{-1}$ ): 3064 (w), 1765 (w), 1691 (s), 1478 (m), 1316 (m), 1164 (w), 1120 (m), 703 (m).

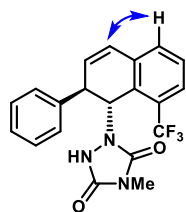

HMBC correlations

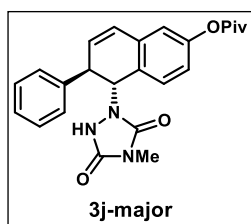

**Synthesis of ( $\pm$ )-3j:** The corresponding compound was prepared following general procedure C employing the commercially available 3.0M Grignard reagent in  $Et_2O$ .  $^1H$  NMR analysis of the crude reaction mixture showed a ratio of constitutional isomers of 1.5:1. Purification by flash chromatography ( $SiO_2$ , hexanes:ethyl acetate = 4:1  $\rightarrow$  2:1) afforded the product as a colorless solid [86.0 mg, 0.21 mmol, 41%]. Constitutional isomers were separated by flash chromatography.

$R_f$  = 0.28 ( $SiO_2$ , hexanes:ethyl acetate = 1:1)

**m.p.** = 110 – 112  $^{\circ}C$

$^1H$  NMR (500 MHz,  $CDCl_3$ )  $\delta$  7.54 – 7.48 (m, 1H), 7.35 – 7.16 (m, 6H), 6.91 (d,  $J$  = 6.8 Hz, 2H), 6.61 (dd,  $J$  = 9.7, 2.2 Hz, 1H), 6.10 (dd,  $J$  = 9.7, 3.9 Hz, 1H), 5.57 (dd,  $J$  = 8.6, 0.9 Hz, 1H), 4.03 (ddd,  $J$  = 8.6, 3.9, 2.2 Hz, 1H), 2.88 (s, 2H), 1.35 (d,  $J$  = 0.9 Hz, 9H).

$^{13}C$  NMR (126 MHz,  $CDCl_3$ )  $\delta$  177.2, 154.8, 154.1, 151.7, 139.7, 135.4, 131.37, 131.36, 128.8, 128.3, 127.9, 127.4, 127.3, 121.2, 120.0, 60.5, 45.3, 39.3, 27.2, 25.2.

**HRMS** (ESI-TOF,  $m/z$ ) calcd. For  $C_{26}H_{28}N_3O_6$   $[M+CH_3COO]^-$  calc.: 478.1984; Found: 478.1962.

**IR** (ATR, neat,  $cm^{-1}$ ): 2974 (w), 1751 (m), 1696 (s), 1478 (m), 1244 (m), 1149 (m), 1120 (m), 761 (w).

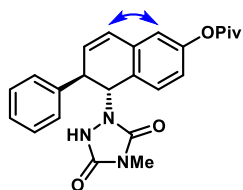

HMBC correlations



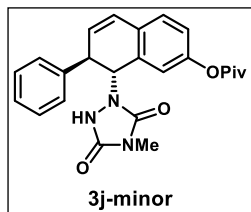

$R_f = 0.39$  (SiO<sub>2</sub>, hexanes:ethyl acetate = 1:1)

**m.p.** = 94 – 95 °C

**<sup>1</sup>H NMR** (500 MHz, CDCl<sub>3</sub>)  $\delta$  7.33 – 7.21 (m, 5H), 7.18 (d,  $J = 8.2$  Hz, 1H), 6.99 (ddd,  $J = 8.2, 2.3, 0.7$  Hz, 1H), 6.95 (d,  $J = 2.3$  Hz, 1H), 6.62 (dd,  $J = 9.7, 2.5$  Hz, 1H), 6.04 (dd,  $J = 9.7, 3.4$  Hz, 1H), 5.61 (d,  $J = 10.0$  Hz, 1H), 4.08 (ddd,  $J = 10.0, 3.4, 2.5$  Hz, 1H), 2.84 (s, 3H), 1.32 (s, 9H).

**<sup>13</sup>C NMR** (126 MHz, Chloroform-d)  $\delta$  177.2, 154.8, 154.5, 151.1, 139.8, 132.2, 131.6, 130.4, 128.8, 128.5, 128.0, 127.9, 127.1, 122.0, 119.6, 61.3, 44.9, 39.2, 27.2, 25.2.

**HRMS** (ESI-TOF,  $m/z$ ) calcd. For C<sub>24</sub>H<sub>25</sub>N<sub>3</sub>NaO<sub>4</sub> [M+Na]<sup>+</sup> calc.: 442.1737; Found: 442.1736.

**IR** (ATR, neat, cm<sup>-1</sup>): 2972 (w), 1750 (w), 1693 (s), 1477 (m), 1395 (w), 1111 (s), 1022 (m), 760 (m).

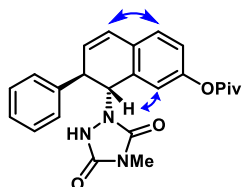

HMBC correlations

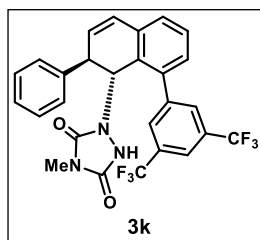

**Synthesis of (±)-3k:** The corresponding compound was prepared following general procedure C employing the commercially available 3.0M Grignard reagent in Et<sub>2</sub>O. <sup>1</sup>H NMR analysis of the crude reaction mixture showed a ratio of constitutional isomers of 7.7:1. Purification by flash chromatography (SiO<sub>2</sub>, hexanes:ethyl acetate = 3:1 → 2:1) afforded the product as a colorless solid [115 mg, 0.22 mmol, 43%]. Complete purging of the constitutional isomer for analysis was achieved by recrystallization from Et<sub>2</sub>O:Hexanes.

$R_f = 0.41$  (SiO<sub>2</sub>, hexanes:ethyl acetate = 1:1)

**m.p.** = 71 – 72 °C

**<sup>1</sup>H NMR** (500 MHz, CDCl<sub>3</sub>)  $\delta$  7.84 (s, 1H), 7.43 (t,  $J = 7.7$  Hz, 1H), 7.33 (dd,  $J = 7.7, 1.3$  Hz, 1H), 7.29 – 7.22 (m, 4H), 7.14 (dd,  $J = 7.5, 2.0$  Hz, 2H), 7.11 (dd,  $J = 7.5, 1.3$  Hz, 1H), 6.95 (d,  $J = 9.6$  Hz, 1H), 6.28 (ddd,  $J = 9.6, 5.8, 1.1$  Hz, 1H), 5.33 (d,  $J = 1.3$  Hz, 1H), 3.89 (d,  $J = 5.8$  Hz, 1H), 2.93 (s, 3H).

**<sup>13</sup>C NMR** (126 MHz, CDCl<sub>3</sub>)  $\delta$  154.2, 152.1, 141.3, 140.4, 136.9, 134.6, 131.7 (q,  $J = 33.2$  Hz), 129.9, 129.8, 129.1, 129.0, 128.7, 127.65, 127.57, 127.2, 125.3, 124.2, 122.0, 121.8 – 121.5 (m), 56.0, 45.6, 25.0.

**<sup>19</sup>F NMR** (471 MHz, CDCl<sub>3</sub>) δ -62.9.

**HRMS** (ESI-TOF, m/z) calcd. For C<sub>27</sub>H<sub>20</sub>N<sub>3</sub>O<sub>2</sub>F<sub>6</sub> [M+H]<sup>+</sup> calc.: 532.1460; Found: 532.1451.

**IR** (ATR, neat, cm<sup>-1</sup>): 3063 (w), 1767 (w), 1697 (s), 1477 (m), 1380 (m), 1278 (s), 1175 (m), 1134 (s).

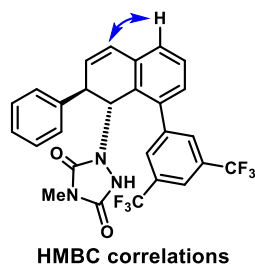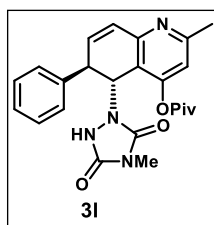

**Synthesis of (±)-31:** The corresponding compound was prepared following general procedure C employing the commercially available 3.0M Grignard reagent in Et<sub>2</sub>O. The reaction was quenched with NH<sub>4</sub>Cl (2.0 mL). <sup>1</sup>H NMR analysis of the crude reaction mixture showed a ratio of constitutional isomers of 4:1. Purification by flash chromatography (SiO<sub>2</sub>, hexanes:ethyl acetate = 3:1 → 2:1) afforded the product as a colorless solid [116 mg, 0.27 mmol, 53%]. Complete purging of the constitutional isomer for analysis was achieved by recrystallization from Et<sub>2</sub>O:Hexanes.

**R<sub>f</sub>** = 0.17 (SiO<sub>2</sub>, hexanes:ethyl acetate = 1:2)

**m.p.** = 187 – 188 °C

**<sup>1</sup>H NMR** (500 MHz, CDCl<sub>3</sub>) δ 9.99 (s, 1H), 7.28 – 7.15 (m, 6H), 6.95 (dd, *J* = 9.9, 1.1 Hz, 1H), 6.80 (s, 1H), 6.47 (ddd, *J* = 9.9, 5.7, 1.1 Hz, 1H), 5.61 (d, *J* = 1.3 Hz, 1H), 3.75 (d, *J* = 5.7 Hz, 1H), 3.16 (s, 3H), 2.23 (s, 3H), 1.28 (s, 9H).

**<sup>13</sup>C NMR** (126 MHz, CDCl<sub>3</sub>) δ 175.6, 160.1, 157.2, 155.2, 154.3, 154.2, 138.0, 134.6, 129.0, 127.7, 127.6, 115.9, 113.0, 53.9, 45.0, 39.6, 26.9, 26.3, 25.4, 23.6.

**HRMS** (ESI-TOF, m/z) calcd. For C<sub>26</sub>H<sub>26</sub>N<sub>4</sub>O<sub>6</sub>F<sub>3</sub> [M+CF<sub>3</sub>COO]<sup>-</sup> calc.: 547.1810; Found: 547.1832.

**IR** (ATR, neat, cm<sup>-1</sup>): 2975 (w), 1763 (m), 1708 (s), 1474 (m), 1271 (w), 1096 (m), 1023 (w), 767 (w).

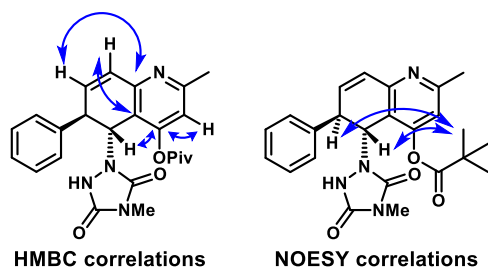

## 4. Derivatization of Carboamination Products

### 4-1. Synthesis of 4

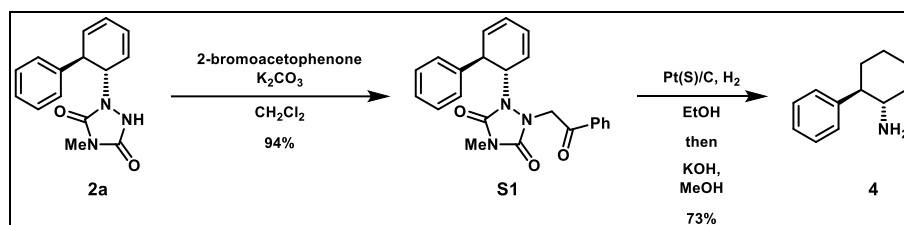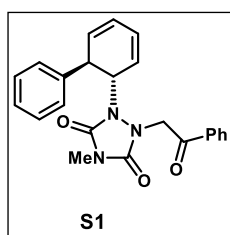

**Synthesis of protected diene S1:** To a stirred solution of diene **2a** (1.80 g, 6.68 mmol, 1.0 equiv.) in CH<sub>2</sub>Cl<sub>2</sub> (67 mL) under ambient atmosphere was added K<sub>2</sub>CO<sub>3</sub> (4.62 g, 33.4 mmol, 5.00 equiv.) and 2-bromoacetophenone (4.00 g, 20.1 mmol, 3.00 equiv.). The resulting suspension was stirred until completion (TLC monitoring). Upon completion, the reaction mixture was quenched with NaHCO<sub>3</sub> (sat. aq. 100 mL). The organic phase was separated and the aqueous phase was extracted with CH<sub>2</sub>Cl<sub>2</sub> (3 × 50 mL). The combined organic extracts were washed with brine (100 mL), dried over MgSO<sub>4</sub>, filtered and concentrated under reduced pressure. The resulting residue was loaded onto silica and purified by flash chromatography (CH<sub>2</sub>Cl<sub>2</sub>, SiO<sub>2</sub>, hexanes:ethyl acetate = 5:1 → 3:1) to give the desired compound as an off-white solid [2.43 g, 6.27 mmol, 94%].

*R<sub>f</sub>* = 0.44 (SiO<sub>2</sub>, hexanes:ethyl acetate = 1:1)

[α]<sub>D</sub><sup>24</sup> = +161.7 (c = 1.00 in CHCl<sub>3</sub>)

m.p. = 134 – 136 °C

<sup>1</sup>H NMR (500 MHz, CDCl<sub>3</sub>) δ 7.88 – 7.81 (m, 2H), 7.68 – 7.59 (m, 1H), 7.53 – 7.47 (m, 2H), 7.24 (s, 2H), 7.23 (s, 2H), 7.20 – 7.12 (m, 1H), 6.16 – 6.03 (m, 2H), 5.99 – 5.87 (m, 1H), 5.50 (dddd, J = 9.6, 3.4, 2.1, 1.0 Hz, 1H), 5.25 – 5.12 (m, 1H), 5.06 (s, 2H), 4.05 – 3.96 (m, 1H), 2.97 (s, 3H).

<sup>13</sup>C NMR (126 MHz, CDCl<sub>3</sub>) δ 191.7, 157.4, 155.4, 141.4, 134.4, 134.3, 131.1, 129.1, 128.7, 128.4, 128.1, 127.7, 127.1, 125.2, 123.3, 60.7, 52.8, 45.2, 25.7.

HRMS (ESI-TOF, m/z) calcd. For C<sub>25</sub>H<sub>24</sub>N<sub>3</sub>O<sub>5</sub> [M+CH<sub>3</sub>COO]<sup>-</sup> calc.: 446.1721; Found: 446.1732.

**IR** (ATR, neat,  $\text{cm}^{-1}$ ): 3039 (w), 2939 (w), 1775 (w), 1713 (s), 1695 (s), 1470 (m), 1226 (m), 687 (m).

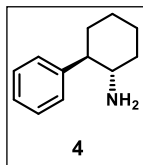

**Synthesis of amine 4:** Protected diene **S1** (250 mg, 0.645 mmol, 1.0 equiv.) and Pt(S)/C (30.0 mg, 5% w/w, 1.0 mol%) were suspended in EtOH (6.5 mL) and degassed with  $\text{H}_2$ . The resulting suspension was stirred under hydrogen atmosphere (1 atm.) overnight. Upon completion, the reaction filtered through celite and concentrated under reduced pressure. The crude residue was then transferred to a pressure tube and was dissolved in MeOH (1 mL) and 50% KOH (aq., 1 mL) and immediately degassed with nitrogen under sonication. The tube was then sealed and stirred at 80 °C for 16 h. The temperature was then raised to 155 °C for 6 h. Upon completion, the reaction was loaded onto silica and purified by flash chromatography ( $\text{H}_2\text{O}$ ,  $\text{SiO}_2$ ,  $\text{CH}_2\text{Cl}_2$ :MeOH = 15:1  $\rightarrow$  6:1) to give the desired compound as a yellow solid [83.0 mg, 0.471 mmol, 73%].

$R_f = 0.27$  ( $\text{SiO}_2$ ,  $\text{CH}_2\text{Cl}_2$ :MeOH = 8:1)

$[\alpha]_{\text{D}}^{24} = +40.7$  ( $c = 1.00$  in  $\text{CHCl}_3$ )

**m.p.** = 268 – 270 °C

**$^1\text{H NMR}$**  (500 MHz,  $\text{CDCl}_3$ )  $\delta$  7.32 (t,  $J = 7.3$  Hz, 2H), 7.29 – 7.23 (m, 1H), 7.23 – 7.20 (m, 2H), 3.09 (td,  $J = 11.4, 3.9$  Hz, 1H), 2.67 (td,  $J = 11.4, 3.7$  Hz, 1H), 2.26 (dd,  $J = 13.1, 3.7$  Hz, 1H), 1.95 – 1.84 (m, 2H), 1.82 – 1.73 (m, 1H), 1.62 – 1.42 (m, 2H), 1.42 – 1.34 (m, 2H).

**$^{13}\text{C NMR}$**  (126 MHz,  $\text{CDCl}_3$ )  $\delta$  140.8, 129.4, 127.9, 127.8, 55.8, 48.8, 34.1, 31.1, 25.5, 24.8.

**HRMS** (ESI-TOF,  $m/z$ ) calcd. For  $\text{C}_{12}\text{H}_{17}\text{NCl}$  [ $\text{M}+\text{Cl}$ ] $^-$  calc.: 210.1055; Found: 210.1045.

**IR** (ATR, neat,  $\text{cm}^{-1}$ ): 2939 (s), 2923 (s), 2860 (s), 2222 (w), 1607 (w), 1507 (s), 758 (m), 727 (m), 702 (s).

## 4-2. Synthesis of 5

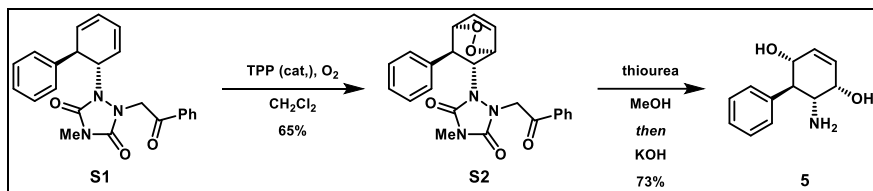

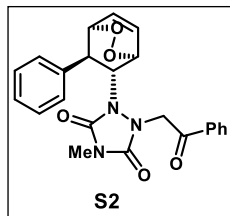

**Synthesis of endoperoxide S2:** Protected diene **S1** (500 mg, 1.290 mmol, 1.0 equiv.) and *meso*-tetraphenylporphyrin (7.93 mg, 0.013 mmol, 1.0 mol%) were dissolved in CH<sub>2</sub>Cl<sub>2</sub> (13 mL) and cooled to -78 °C and irradiated with visible light until complete conversion (TLC monitoring). Upon completion, the reaction loaded onto silica and purified by flash chromatography (CH<sub>2</sub>Cl<sub>2</sub>, SiO<sub>2</sub>, hexanes:ethyl acetate = 4:1 → 2:1) to give the desired compound as a colorless solid [351 mg, 0.837 mmol, 65%].

$R_f$  = 0.33 (SiO<sub>2</sub>, hexanes:ethyl acetate = 1:1)

$[\alpha]_D^{25}$  = +105.7 (c = 1.00 in CHCl<sub>3</sub>)

m.p. = 152 – 153 °C

**<sup>1</sup>H NMR** (500 MHz, CDCl<sub>3</sub>) δ 8.03 – 7.91 (m, 2H), 7.69 – 7.57 (m, 1H), 7.49 (t, J = 7.8 Hz, 2H), 7.34 – 7.22 (m, 3H), 7.15 – 7.09 (m, 2H), 6.81 (ddd, J = 8.3, 6.5, 1.7 Hz, 1H), 6.65 (ddd, J = 8.3, 6.1, 1.5 Hz, 1H), 5.81 (d, J = 18.3 Hz, 1H), 5.29 (d, J = 18.3 Hz, 1H), 4.76 (ddt, J = 6.1, 3.2, 1.7 Hz, 1H), 4.70 (dq, J = 6.5, 1.5 Hz, 1H), 4.66 (dd, J = 6.1, 1.5 Hz, 1H), 3.89 (dd, J = 6.1, 3.2 Hz, 1H), 3.12 (s, 3H).

**<sup>13</sup>C NMR** (126 MHz, CDCl<sub>3</sub>) δ 193.1, 157.7, 155.9, 138.3, 134.7, 134.1, 131.7, 131.3, 129.2, 129.1, 128.2, 128.0, 127.7, 76.7, 75.2, 60.7, 54.1, 40.6, 26.2.

**HRMS** (ESI-TOF, m/z) calcd. For C<sub>23</sub>H<sub>21</sub>N<sub>3</sub>O<sub>5</sub>Br [M+Br]<sup>-</sup> calc.: 500.653; Found: 500.0645.

**IR** (ATR, neat, cm<sup>-1</sup>): 3063 (w), 2940 (w), 2250 (w), 1775 (w), 1709 (s), 1693 (s), 1472 (m), 1226 (m).

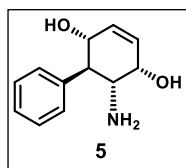

**Synthesis of diol 5:** To a stirred solution of endoperoxide **S2** (200 mg, 0.477 mmol, 1.0 equiv.) in methanol (0.635 mL) in a pressure tube under ambient conditions was added thiourea (72.6 mg, 0.954 mmol, 2.0 equiv.) and the reaction was stirred until complete conversion (TLC monitoring). Upon completion, 50% KOH (aq. 0.635 mL) was added and the reaction was immediately degassed with nitrogen under sonication. The tube was then sealed and stirred at 80 °C for 16 h. The temperature was then raised to 155 °C for 6 h. Upon completion, the reaction was loaded onto silica and purified by flash chromatography (H<sub>2</sub>O, SiO<sub>2</sub>, CH<sub>2</sub>Cl<sub>2</sub>:MeOH = 15:1 → 6:1) to give the desired compound as a colorless solid [71.0 mg, 0.346 mmol, 73%].

$R_f$  = 0.12 (SiO<sub>2</sub>, CH<sub>2</sub>Cl<sub>2</sub>:MeOH = 8:1)

$[\alpha]_D^{25}$  = +33.6 (c = 1.00 in MeOH)

m.p. = 58 – 60 °C

**<sup>1</sup>H NMR** (500 MHz, MeOD)  $\delta$  7.41 – 7.36 (m, 2H), 7.35 – 7.31 (m, 2H), 7.31 – 7.26 (m, 1H), 5.96 – 5.93 (m, 1H), 5.91 (dd,  $J$  = 10.0, 1.5 Hz, 1H), 4.27 (dq,  $J$  = 9.4, 1.5 Hz, 1H), 4.13 (td,  $J$  = 4.0, 1.1 Hz, 1H), 3.05 (dd,  $J$  = 11.6, 4.0 Hz, 1H), 2.78 (dd,  $J$  = 11.6, 9.4 Hz, 1H).

**<sup>13</sup>C NMR** (126 MHz, MeOD)  $\delta$  141.4, 135.6, 130.2, 129.9, 128.8, 128.2, 73.2, 66.3, 54.3, 52.7.

**HRMS** (ESI-TOF,  $m/z$ ) calcd. For C<sub>14</sub>H<sub>15</sub>F<sub>3</sub>NO<sub>4</sub> [M+CF<sub>3</sub>COO]<sup>+</sup> calc.: 318.0959; Found: 318.0971.

**IR** (ATR, neat, cm<sup>-1</sup>): 3297 (br), 3028 (w), 2904 (w), 2460 (br), 2066 (w), 1494 (w), 1453 (w), 1058 (m).

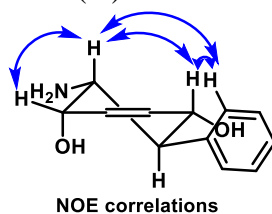

### 4-3. Synthesis of 6

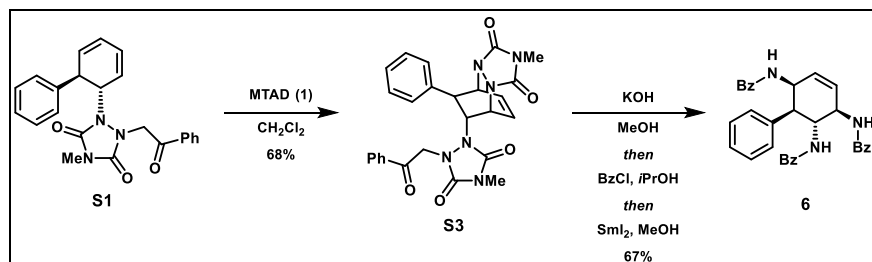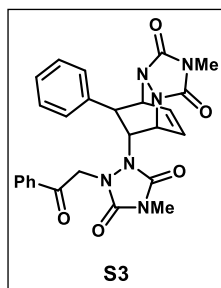

**Synthesis of bicycle S3:** To a stirred solution of protected diene **S1** (500 mg, 1.290 mmol, 1.0 equiv.) in CH<sub>2</sub>Cl<sub>2</sub> (13 mL) at -78 °C was added MTAD (**1**, 146 mg, 1.290 mmol, 1.0 equiv.) as a solution in CH<sub>2</sub>Cl<sub>2</sub> (5 mL) and the reaction was allowed to slowly warm to room temperature and stir until complete conversion (TLC monitoring). <sup>1</sup>H NMR analysis of the crude reaction mixture showed a d.r. of 3:1. Upon completion, the reaction was loaded onto silica and purified by flash chromatography (CH<sub>2</sub>Cl<sub>2</sub>, SiO<sub>2</sub>, Et<sub>2</sub>O:PhMe = 1:1 → 3:1) to give the desired compound as a colorless solid [437 mg, 0.873 mmol, 68%].

$R_f$  = 0.51 (SiO<sub>2</sub>, CH<sub>2</sub>Cl<sub>2</sub>:MeOH = 8:1)

$[\alpha]_D^{25}$  = +46.8 (c = 1.00 in CHCl<sub>3</sub>)

m.p. = 142 – 145 °C

**<sup>1</sup>H NMR** (500 MHz, CDCl<sub>3</sub>)  $\delta$  7.67 – 7.63 (m, 2H), 7.60 (ddt,  $J$  = 8.7, 7.2, 1.3 Hz, 1H), 7.47 – 7.40 (m, 2H), 7.30 – 7.27 (m, 2H), 7.22 – 7.13 (m, 3H), 6.66 (ddd,  $J$  = 8.1, 5.9, 1.5 Hz, 1H), 6.43 (ddd,  $J$  = 8.1, 5.5, 1.5 Hz, 1H), 5.18 (ddd,  $J$  = 5.5, 2.4, 1.5 Hz, 1H), 4.83 (dt,  $J$  = 5.9, 2.0 Hz, 1H),

4.62 (s, 2H), 4.29 (dd,  $J = 6.3, 2.4$  Hz, 1H), 3.51 (dd,  $J = 6.3, 2.0$  Hz, 1H), 3.12 (s, 3H), 2.99 (s, 3H).

$^{13}\text{C}$  NMR (126 MHz,  $\text{CDCl}_3$ )  $\delta$  191.3, 158.5, 157.5, 157.2, 154.6, 138.4, 134.5, 133.9, 130.9, 129.10, 129.09, 128.0, 127.91, 127.90, 127.8, 61.2, 55.9, 52.8, 52.3, 45.8, 25.9, 25.8.

**HRMS** (ESI-TOF,  $m/z$ ) calcd. For  $\text{C}_{26}\text{H}_{24}\text{N}_6\text{O}_5$   $[\text{M}]^+$  calc.: 500.1808; Found: 500.1796.

**IR** (ATR, neat,  $\text{cm}^{-1}$ ): 2948 (w), 1775 (m), 1709 (s), 1456 (m), 1394 (w), 1226 (w), 917 (w), 757 (w).

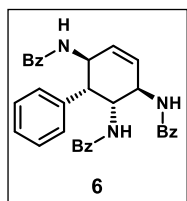

**Synthesis of triamide 6:** Bicycle **S3** (250 mg, 0.499 mmol, 1.0 equiv.) in a pressure tube was dissolved in MeOH (2 mL) and 50% KOH (aq., 5 mL) and immediately degassed with nitrogen under sonication. The tube was then sealed and stirred at 80 °C for 16 h. The temperature was then raised to 155 °C for 6 h. The reaction was cooled to room temperature and diluted with water (10 mL) and cooled to 0 °C. Then HCl (12N, 4.50 mL) was added dropwise [*note: pH remained basic*]. Then *i*PrOH (5 mL) and benzoyl chloride (0.87 mL, 7.49 mmol, 15 equiv.) were added and the reaction was warmed to ambient temperature and stirred until complete conversion (TLC monitoring). Upon completion, the reaction was carefully quenched with  $\text{NaHCO}_3$  (sat. aq. 20 mL) and diluted with  $\text{CH}_2\text{Cl}_2$  (10 mL). The phases were separated and the aqueous layer was extracted with  $\text{CH}_2\text{Cl}_2$  ( $3 \times 20$  mL). The combined organics were washed with brine (30 mL), dried over  $\text{MgSO}_4$ , filtered and concentrated under reduced pressure. The crude residue was passed through a short column ( $\text{SiO}_2$ , hexanes:EtOAc mixture), and used directly for the next step. The product was then dissolved in methanol (3.0 mL), degassed under sonication for 10 minutes, and cooled to 0 °C.  $\text{SmI}_2$  (0.10 M THF solution) was then added dropwise to the mixture until the solution turned from colorless to blue, then allowed to warm to room temperature for 30 min. The mixture was diluted with ethyl acetate (10 mL), then  $\text{NH}_4\text{Cl}$  (sat. aq. 10 mL) and water (10 mL) were added and the phases were separated. The aqueous layer was extracted with ethyl acetate ( $3 \times 20$  mL), and the combined organics were washed with brine (30 mL), dried over  $\text{MgSO}_4$ , filtered and loaded onto silica and purified by flash chromatography (EtOAc,  $\text{SiO}_2$ ,  $\text{Et}_2\text{O}:\text{PhMe} = 3:1 \rightarrow 4:1$ ) to give the desired compound as a colorless solid [173 mg, 0.336 mmol, 67%].

$R_f = 0.12$  ( $\text{SiO}_2$ , hexanes:ethyl acetate = 1:2)

$[\alpha]_D^{24} = +83.3$  ( $c = 1.00$  in  $\text{CHCl}_3$ )

**m.p.** = 266 – 268 °C

$^1\text{H}$  NMR (500 MHz, MeOD)  $\delta$  8.43 (d,  $J = 9.5$ , NH), 9.43 (d,  $J = 9.5$ , NH), 7.87 (m, NH), 7.79 – 7.72 (m, 2H), 7.67 – 7.59 (m, 2H), 7.18 (ddd,  $J = 14.7, 8.2, 6.8$  Hz, 4H), 7.14 – 7.08 (m, 1H), 5.97 (ddd,  $J = 9.8, 5.0, 2.4$  Hz, 1H), 5.94 – 5.88 (m, 1H), 5.21 – 5.07 (m, 2H), 4.96 (dq,  $J = 9.3, 1.5$  Hz), 3.71 (dd,  $J = 12.8, 5.0$  Hz, 1H).

$^{13}\text{C}$  NMR (126 MHz, MeOD)  $\delta$  171.3, 170.5, 169.6, 139.6, 136.1, 136.0, 135.9, 132.7, 132.5, 132.3, 131.9, 130.3, 129.6, 129.4, 129.3, 129.2, 128.9, 128.6, 128.3, 128.0, 127.8, 54.9, 50.4, 50.3, 50.0.

HRMS (ESI-TOF,  $m/z$ ) calcd. For  $\text{C}_{33}\text{H}_{29}\text{BrN}_3\text{O}_3$  [ $\text{M}+\text{Br}$ ] $^-$  calc.: 596.1383; Found: 596.1392.

IR (ATR, neat,  $\text{cm}^{-1}$ ): 3312 (br), 3061 (w), 3030 (w), 1634 (s), 1578 (m), 1521 (s), 1414 (m), 1328 (m).

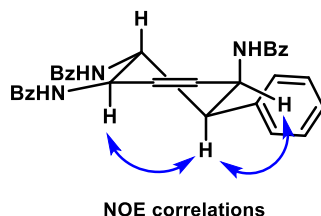

#### 4-4. Synthesis of 7

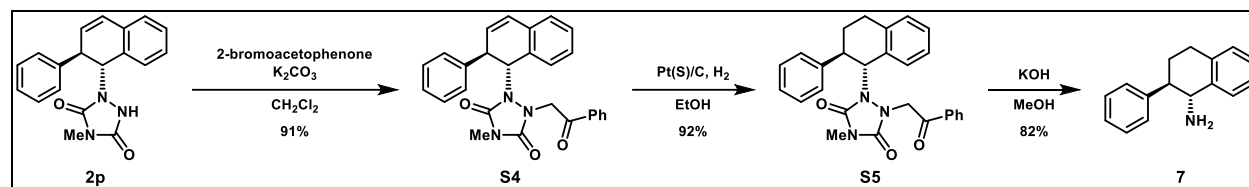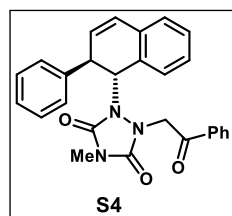

**Synthesis of protected naphthalene product S4:** To a stirred solution of naphthalene product **2p** (1.28 g, 4.01 mmol, 1.0 equiv.) in  $\text{CH}_2\text{Cl}_2$  (40 mL) under ambient atmosphere was added  $\text{K}_2\text{CO}_3$  (2.77 g, 20.0 mmol, 5.00 equiv.) and 2-bromoacetophenone (2.39 g, 12.0 mmol, 3.00 equiv.). The resulting suspension was stirred until completion (TLC monitoring). Upon completion, the reaction mixture was quenched with  $\text{NaHCO}_3$  (sat. aq. 100 mL). The organic phase was separated and the aqueous phase was extracted with  $\text{CH}_2\text{Cl}_2$  ( $3 \times 50$  mL). The combined organic extracts were washed with brine (100 mL), dried over  $\text{MgSO}_4$ , filtered and concentrated under reduced pressure. The resulting residue was loaded onto silica and purified by flash chromatography ( $\text{CH}_2\text{Cl}_2$ ,  $\text{SiO}_2$ , hexanes:ethyl acetate = 5:1  $\rightarrow$  3:1) to give the desired compound as an off-white solid [1.60 g, 3.65 mmol, 91%].

$R_f$  = 0.54 ( $\text{SiO}_2$ , hexanes:ethyl acetate = 1:1)

$[\alpha]_D^{25}$  = +71.4 ( $c$  = 1.00 in  $\text{CHCl}_3$ )

m.p. = 74 – 76  $^\circ\text{C}$

$^1\text{H}$  NMR (500 MHz,  $\text{CDCl}_3$ )  $\delta$  7.60 (dd,  $J$  = 8.3, 1.3 Hz, 2H), 7.59 – 7.54 (m, 1H), 7.42 – 7.36 (m, 2H), 7.34 – 7.26 (m, 4H), 7.25 – 7.20 (m, 1H), 7.11 (dd,  $J$  = 7.5, 1.5 Hz, 2H), 7.07 (tt,  $J$  = 7.5, 1.3 Hz, 1H), 6.73 (td,  $J$  = 7.5, 1.5 Hz, 1H), 6.59 (dd,  $J$  = 9.7, 2.6 Hz, 1H), 6.00 (dd,  $J$  = 9.7, 3.0 Hz,



1H), 5.77 (d,  $J = 11.4$  Hz, 1H), 4.95 (d,  $J = 18.2$  Hz, 1H), 4.63 (d,  $J = 18.2$  Hz, 1H), 4.13 (dt,  $J = 11.4, 3.0$  Hz, 1H), 2.92 (s, 3H).

$^{13}\text{C}$  NMR (126 MHz,  $\text{CDCl}_3$ )  $\delta$  192.2, 157.4, 156.3, 140.8, 134.3, 134.1, 133.4, 131.8, 130.9, 128.8, 128.7, 128.6, 128.5, 128.4, 127.9, 127.8, 127.3, 127.0, 126.0, 62.7, 53.2, 45.2, 25.6.

**HRMS** (ESI-TOF,  $m/z$ ) calcd. For  $\text{C}_{27}\text{H}_{23}\text{N}_3\text{O}_3\text{Cl} [\text{M}+\text{Cl}]^-$  calc.: 472.1433; Found: 472.1438.

**IR** (ATR, neat,  $\text{cm}^{-1}$ ): 3030 (w), 2939 (w), 1774 (w), 1712 (s), 1694 (s), 1471 (m), 1450 (m) 1226 (m).

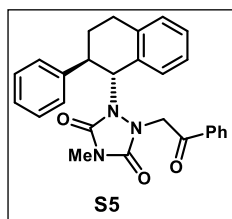

**Synthesis of protected hydrogenation product S5:** Protected naphthalene product **S4** (250 mg, 0.571 mmol, 1.0 equiv.) and Pt(S)/C (20.0 mg, 5% w/w, 1.0 mol%) were suspended in EtOH (5.7 mL) and degassed with  $\text{H}_2$ . The resulting suspension was stirred under hydrogen atmosphere (1 atm.) overnight. Upon completion, the reaction filtered through celite and concentrated under reduced pressure. The resulting residue was loaded onto silica and purified by flash chromatography ( $\text{CH}_2\text{Cl}_2$ ,  $\text{SiO}_2$ , hexanes:ethyl acetate = 5:1  $\rightarrow$  3:1) to give the desired compound as a colorless solid [230 mg, 0.523 mmol, 92%].

$R_f = 0.27$  ( $\text{SiO}_2$ , hexanes:ethyl acetate = 2:1)

$[\alpha]_D^{23} = -26.9$  ( $c = 1.00$  in  $\text{CHCl}_3$ )

**m.p.** = 159 – 161  $^\circ\text{C}$

$^1\text{H}$  NMR (500 MHz,  $\text{CDCl}_3$ )  $\delta$  7.60 – 7.46 (m, 1H), 7.44 – 7.40 (m, 2H), 7.36 – 7.31 (m, 2H), 7.27 (d,  $J = 3.0$  Hz, 4H), 7.23 – 7.18 (m, 2H), 7.09 (d,  $J = 7.6$  Hz, 1H), 6.90 (t,  $J = 7.6$  Hz, 1H), 6.61 (t,  $J = 7.6$  Hz, 1H), 5.62 (d,  $J = 11.1$  Hz, 1H), 4.82 (d,  $J = 18.0$  Hz, 1H), 4.24 (d,  $J = 18.0$  Hz, 1H), 3.41 – 3.25 (m, 1H), 3.10 (tt,  $J = 13.2, 4.8$  Hz, 1H), 2.94 (ddd,  $J = 16.8, 4.8, 2.1$  Hz, 1H), 2.79 (s, 3H), 2.23 (qd,  $J = 12.8, 4.8$  Hz, 1H), 2.18 – 2.11 (m, 1H).

$^{13}\text{C}$  NMR (126 MHz,  $\text{CDCl}_3$ )  $\delta$  191.8, 157.2, 156.0, 141.4, 136.9, 135.0, 134.2, 133.9, 129.2, 128.6, 128.5, 128.0, 127.7, 127.6, 127.6, 127.3, 126.8, 62.7, 52.9, 45.4, 30.17, 30.16, 25.4.

**HRMS** (ESI-TOF,  $m/z$ ) calcd. For  $\text{C}_{27}\text{H}_{25}\text{N}_3\text{NaO}_3 [\text{M}+\text{Na}]^+$  calc.: 462.1788; Found: 462.1770.

**IR** (ATR, neat,  $\text{cm}^{-1}$ ): 3061 (w), 2932 (w), 1771 (w), 1709 (s), 1692 (s), 1470 (m), 1450 (m) 1225 (m).

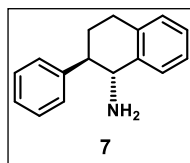

**Synthesis of amine 7:** Protected hydrogenated naphthalene product **S5** (180 mg, 0.410 mmol, 1.0 equiv.) in a pressure tube was dissolved in MeOH (1 mL) and 50% KOH (aq., 1 mL) and immediately degassed with nitrogen under sonication. The tube was then sealed and stirred at 80  $^\circ\text{C}$  for 16 h. The temperature was then raised to 155  $^\circ\text{C}$  for 6 h. Upon completion, the reaction was diluted with  $\text{Et}_2\text{O}$  (5

mL) and the phases were separated. The aqueous layer was extracted with Et<sub>2</sub>O (5 × 5 mL) and the combined organics were washed with brine, dried over MgSO<sub>4</sub>, filtered, loaded onto silica and purified by flash chromatography (Et<sub>2</sub>O, SiO<sub>2</sub>, hexanes:ethyl acetate = 1:2) to give the desired compound as a yellow oil [75.0 mg, 0.336 mmol, 82%].

*R<sub>f</sub>* = 0.15 (SiO<sub>2</sub>, hexanes:ethyl acetate = 1:2)

[α]<sub>D</sub><sup>23</sup> = -9.9 (c = 1.00 in MeOH)

<sup>1</sup>H NMR (500 MHz, CDCl<sub>3</sub>) δ 7.68 (dt, *J* = 7.7, 1.2 Hz, 1H), 7.38 (dd, *J* = 8.0, 7.0 Hz, 2H), 7.29 (dt, *J* = 8.0, 1.2 Hz, 3H), 7.25 (dd, *J* = 7.5, 1.5 Hz, 1H), 7.21 (td, *J* = 7.7, 1.5 Hz, 1H), 7.15 (dd, *J* = 7.7, 1.5 Hz, 1H), 4.12 (d, *J* = 9.6 Hz, 1H), 3.15 – 2.97 (m, 1H), 2.90 (dt, *J* = 16.8, 4.2 Hz, 1H), 2.77 – 2.54 (m, 1H), 2.10 (tdd, *J* = 9.1, 4.8, 2.6 Hz, 2H), 1.42 (s, 2H).

<sup>13</sup>C NMR (126 MHz, CDCl<sub>3</sub>) δ 144.6, 140.4, 136.6, 128.8, 128.7, 127.9, 127.3, 126.8, 126.6, 126.3, 56.0, 52.1, 30.02, 30.00.

HRMS (ESI-TOF, *m/z*) calcd. For C<sub>16</sub>H<sub>17</sub>N [M]<sup>-</sup> calc.: 223.1361; Found: 223.1352.

IR (ATR, neat, cm<sup>-1</sup>): 3377 (w), 3060 (w), 3026 (w), 2925 (w), 1601 (w), 1491 (m), 1452 (m) 758 (s).

#### 4-5. Synthesis of ketone 8

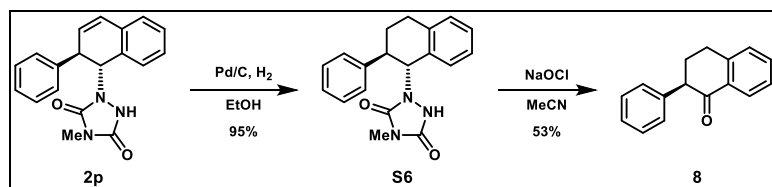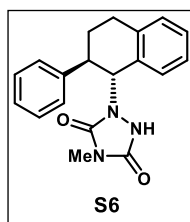

**Synthesis of hydrogenated naphthalene product S6:** Naphthalene product **2p** (100 mg, 0.313 mmol, 1.0 equiv.) and Pd/C (17.0 mg, 10% w/w, 5.0 mol%) were suspended in EtOH (3.0 mL) and degassed with H<sub>2</sub>. The resulting suspension was stirred under hydrogen atmosphere (1 atm.) overnight. Upon completion, the reaction filtered through celite and concentrated under reduced pressure. The resulting residue was loaded onto silica and purified by flash chromatography (CH<sub>2</sub>Cl<sub>2</sub>, SiO<sub>2</sub>, hexanes:ethyl acetate = 3:1 → 2:1) to give the desired compound as a colorless solid [96.0 mg, 0.299 mmol, 95%].

*R<sub>f</sub>* = 0.32 (SiO<sub>2</sub>, hexanes:ethyl acetate = 1:1)

[α]<sub>D</sub><sup>24</sup> = +16.9 (c = 1.00 in CHCl<sub>3</sub>)

*m.p.* = 206 – 207 °C

**<sup>1</sup>H NMR** (500 MHz, CDCl<sub>3</sub>) δ 7.32 – 7.27 (m, 2H), 7.27 – 7.23 (m, 4H), 7.22 – 7.14 (m, 3H), 5.56 (d, *J* = 11.0 Hz, 1H), 3.27 (ddd, *J* = 12.4, 11.0, 2.8 Hz, 1H), 3.12 – 3.00 (m, 1H), 2.99 – 2.90 (m, 1H), 2.76 (s, 3H), 2.25 (qd, *J* = 12.6, 5.4 Hz, 1H), 2.16 (ddt, *J* = 13.3, 5.4, 2.8 Hz, 1H).

**<sup>13</sup>C NMR** (126 MHz, CDCl<sub>3</sub>) δ 155.1, 154.5, 141.6, 138.1, 133.6, 129.6, 128.6, 128.1, 127.8, 127.6, 126.8, 126.6, 61.6, 44.8, 29.84, 29.77, 25.0.

**HRMS** (ESI-TOF, *m/z*) calcd. For C<sub>19</sub>H<sub>19</sub>BrN<sub>3</sub>O<sub>2</sub> [M+Br]<sup>-</sup> calc.: 400.0666; Found: 400.0671.

**IR** (ATR, neat, cm<sup>-1</sup>): 3028 (w), 2932 (w), 1767 (w), 1685 (s), 1480 (m), 1454 (m) 751 (m), 727 (m).

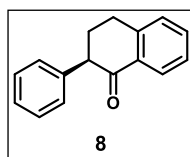

**Synthesis of (*R*)-(-)-2-phenyl-(1)-tetralone 8:** To a stirred solution of hydrogenated naphthalene product **S6** (30.0 mg, 0.093 mmol, 1.0 equiv.) at -20 °C in MeCN (2 mL) was added dropwise NaOCl (0.850 mL). Upon complete addition, the reaction was stirred vigorously at that temperature for 1 min. before quenching with Na<sub>2</sub>S<sub>2</sub>O<sub>3</sub> (10% aq., 5 mL). The reaction was diluted with ethyl acetate and the phases were separated. The aqueous layer was extracted with ethyl acetate (3 × 5 mL). The combined organics were washed with brine, dried over MgSO<sub>4</sub>, filtered, and concentrated. The resulting residue was loaded onto silica and purified by flash chromatography (ethyl acetate, SiO<sub>2</sub>, hexanes:ethyl acetate = 3:1 → 2:1) to give the desired compound as a colorless oil [11.0 mg, 0.050 mmol, 53%]. Characterization data agrees with those reported in the literature.<sup>8</sup>

*R<sub>f</sub>* = 0.30 (SiO<sub>2</sub>, hexanes:ethyl acetate = 10:1)

[α]<sub>D</sub><sup>22</sup> = -16.4 (c = 0.85 in CHCl<sub>3</sub>)

**<sup>1</sup>H NMR** (500 MHz, CDCl<sub>3</sub>) δ 8.10 (dd, *J* = 7.9, 1.5 Hz, 1H), 7.51 (td, *J* = 7.5, 1.5 Hz, 1H), 7.38 – 7.31 (m, 3H), 7.31 – 7.27 (m, 2H), 7.21 – 7.17 (m, 2H), 3.94 – 3.68 (m, 1H), 3.17 – 3.09 (m, 1H), 3.05 (dt, *J* = 16.8, 4.8, 1H), 2.54 – 2.32 (m, 2H).

**<sup>13</sup>C NMR** (126 MHz, CDCl<sub>3</sub>) δ 198.3, 144.2, 139.9, 133.6, 133.0, 128.9, 128.7, 128.6, 128.0, 127.1, 126.9, 54.5, 31.3, 28.9.

**HRMS** (ESI-TOF, *m/z*) calcd. For C<sub>16</sub>H<sub>15</sub>O [M+H]<sup>+</sup> calc.: 223.1123; Found: 223.1117.

**IR** (ATR, neat, cm<sup>-1</sup>): 3028 (w), 2931 (w), 1730 (w), 1683 (s), 1599 (m), 1453 (m) 1223 (m), 740 (m).

#### 4-6. Synthesis of 9

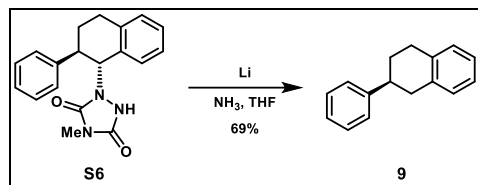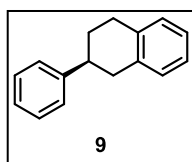

**Synthesis of (S)-(-)-2-phenyltetralin 9:** To a stirred suspension of hydrogenated naphthalene product **S6** (45.0 mg, 0.140 mmol, 1.0 equiv.) at  $-78\text{ }^{\circ}\text{C}$  in THF (1 mL) was condensed ammonia (ca. 5 mL), whereupon the substrate became completely soluble. The atmosphere was replaced with nitrogen and lithium (3.90 mg, 0.560 mmol, 4.0 equiv.) was added. The reaction was stirred 30 sec. before the careful addition of solid  $\text{NH}_4\text{Cl}$  (large excess). The reaction was allowed to slowly warm to room temperature with venting and was diluted with water (5 mL) and ethyl acetate (5 mL) and the phases were separated. The aqueous layer was extracted with ethyl acetate ( $3 \times 5\text{ mL}$ ). The combined organics were washed with brine, dried over  $\text{MgSO}_4$ , filtered, and concentrated. The resulting residue was loaded onto silica and purified by flash chromatography (ethyl acetate,  $\text{SiO}_2$ , hexanes) to give the desired compound as a colorless oil [20.0 mg, 0.096 mmol, 69%]. Characterization data for this compound matches with those reported in the literature.<sup>8</sup>

$R_f = 0.71$  ( $\text{SiO}_2$ , hexanes:ethyl acetate = 10:1)

$[\alpha]_D^{25} = -59.8$  ( $c = 1.0$  in  $\text{CHCl}_3$ )

$^1\text{H NMR}$  (500 MHz,  $\text{CDCl}_3$ )  $\delta$  7.37 – 7.32 (m, 2H), 7.31 – 7.28 (m, 2H), 7.26 – 7.22 (m, 1H), 7.17 – 7.08 (m, 4H), 3.11 – 2.88 (m, 5H), 2.21 – 2.10 (m, 1H), 2.02 – 1.90 (m, 1H).

$^{13}\text{C NMR}$  (126 MHz,  $\text{CDCl}_3$ )  $\delta$  146.8, 136.8, 136.4, 129.2, 129.1, 128.6, 127.0, 126.3, 125.9, 125.8, 40.9, 37.9, 30.5, 29.9.

**HRMS** (EI-TOF,  $m/z$ ) calcd. For  $\text{C}_{16}\text{H}_{16} [\text{M}]^+$  calc.: 208.1252; Found: 208.1260.

**IR** (ATR, neat,  $\text{cm}^{-1}$ ): 3025 (w), 3060 (w), 2920 (m), 1493 (m), 1452 (m), 757 (m) 742 (s), 698 (s).

## 6. HPLC spectra

### <Chromatogram>

mAU

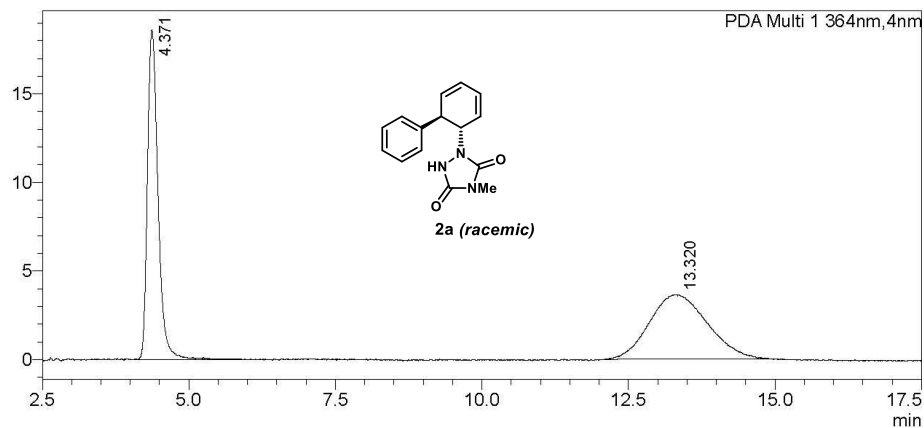

### <Peak Table>

PDA Ch1 364nm

| Peak# | Ret. Time | Area   | Height | Area%   | Height% | Resolution(USP) |
|-------|-----------|--------|--------|---------|---------|-----------------|
| 1     | 4.371     | 234912 | 18615  | 48.424  | 83.599  | --              |
| 2     | 13.320    | 250201 | 3652   | 51.576  | 16.401  | 8.146           |
| Total |           | 485114 | 22267  | 100.000 | 100.000 |                 |

### <Chromatogram>

mAU

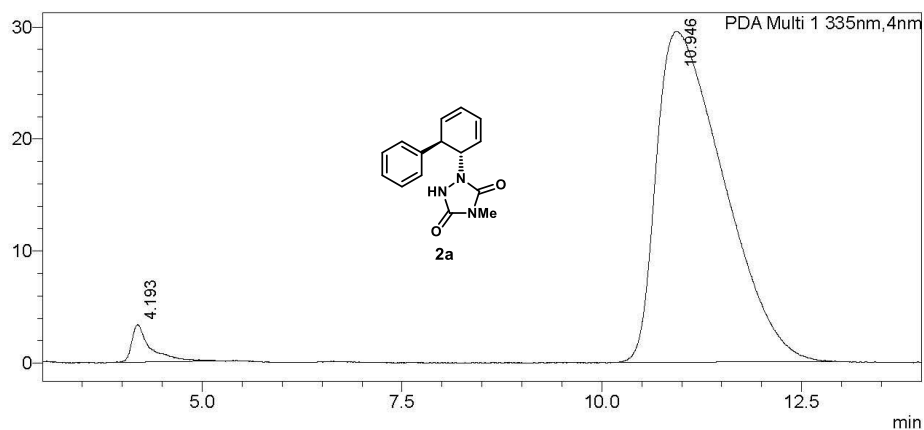

### <Peak Table>

PDA Ch1 335nm

| Peak# | Ret. Time | Area    | Height | Area%   | Height% | Resolution(USP) |
|-------|-----------|---------|--------|---------|---------|-----------------|
| 1     | 4.193     | 54782   | 3328   | 3.070   | 10.135  | --              |
| 2     | 10.946    | 1729859 | 29511  | 96.930  | 89.865  | 6.986           |
| Total |           | 1784641 | 32839  | 100.000 | 100.000 |                 |

### <Chromatogram>

mAU

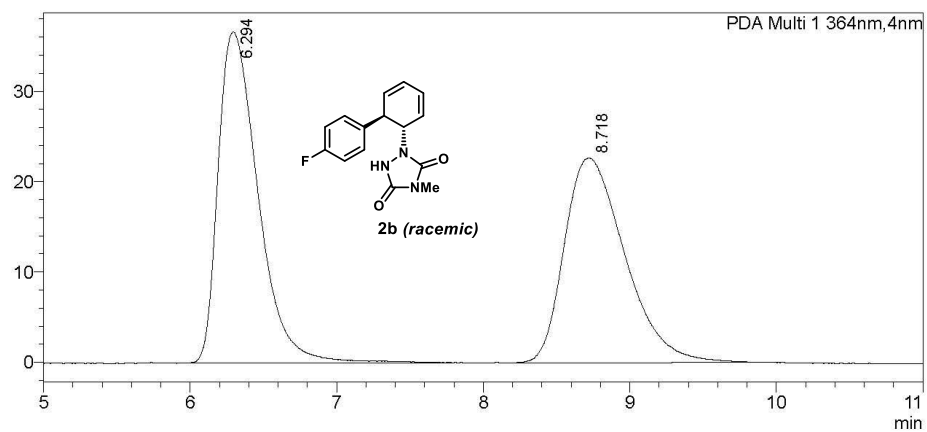

### <Peak Table>

PDA Ch1 364nm

| Peak# | Ret. Time | Area    | Height | Area%   | Height% | Resolution(USP) |
|-------|-----------|---------|--------|---------|---------|-----------------|
| 1     | 6.294     | 691424  | 36632  | 51.557  | 61.771  | --              |
| 2     | 8.718     | 649673  | 22671  | 48.443  | 38.229  | 3.916           |
| Total |           | 1341097 | 59303  | 100.000 | 100.000 |                 |

### <Chromatogram>

mAU

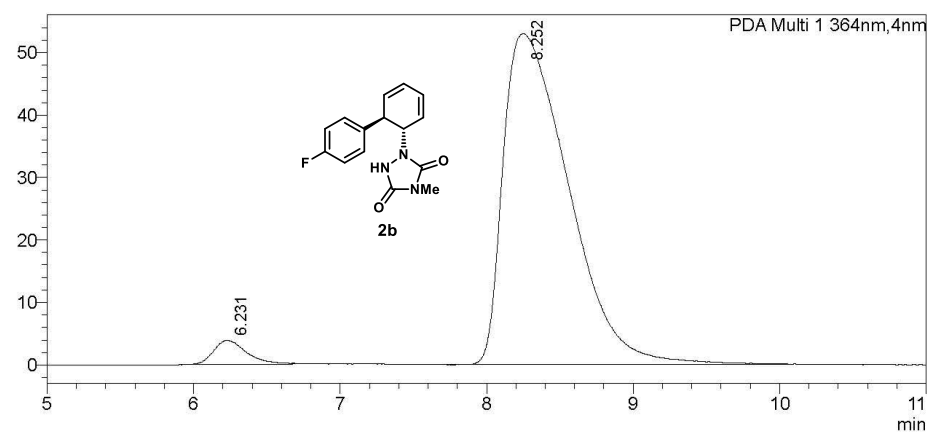

### <Peak Table>

PDA Ch1 364nm

| Peak# | Ret. Time | Area    | Height | Area%   | Height% | Resolution(USP) |
|-------|-----------|---------|--------|---------|---------|-----------------|
| 1     | 6.231     | 61426   | 3850   | 3.606   | 6.778   | --              |
| 2     | 8.252     | 1641945 | 52950  | 96.394  | 93.222  | 3.304           |
| Total |           | 1703371 | 56800  | 100.000 | 100.000 |                 |

### <Chromatogram>

mAU

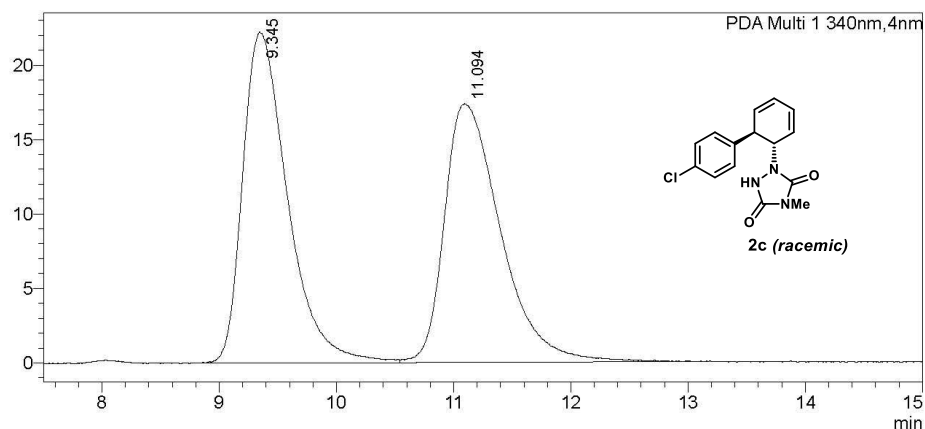

### <Peak Table>

| Peak# | Ret. Time | Area    | Height | Area%   | Height% | Resolution(USP) |
|-------|-----------|---------|--------|---------|---------|-----------------|
| 1     | 9.345     | 591758  | 22243  | 50.540  | 56.131  | --              |
| 2     | 11.094    | 579104  | 17383  | 49.460  | 43.869  | 2.295           |
| Total |           | 1170862 | 39626  | 100.000 | 100.000 |                 |

### <Chromatogram>

mAU

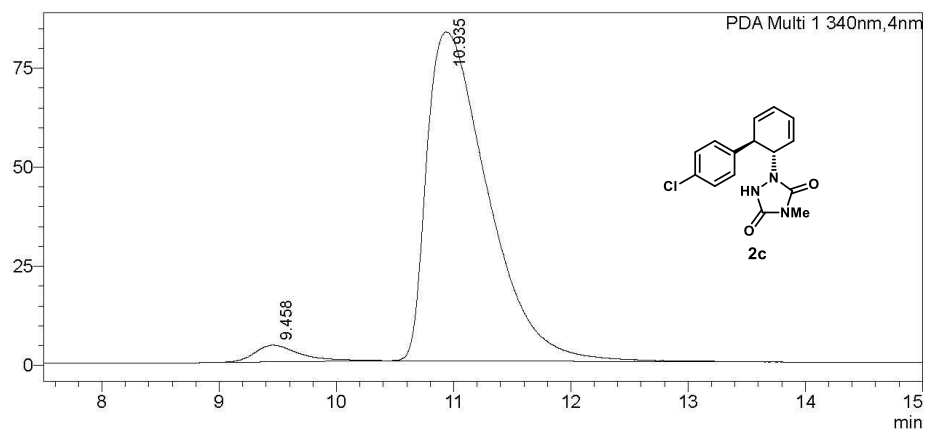

### <Peak Table>

| Peak# | Ret. Time | Area    | Height | Area%   | Height% | Resolution(USP) |
|-------|-----------|---------|--------|---------|---------|-----------------|
| 1     | 9.458     | 113330  | 4199   | 3.636   | 4.812   | --              |
| 2     | 10.935    | 3003976 | 83078  | 96.364  | 95.188  | 1.865           |
| Total |           | 3117305 | 87278  | 100.000 | 100.000 |                 |

<Chromatogram>

mAU

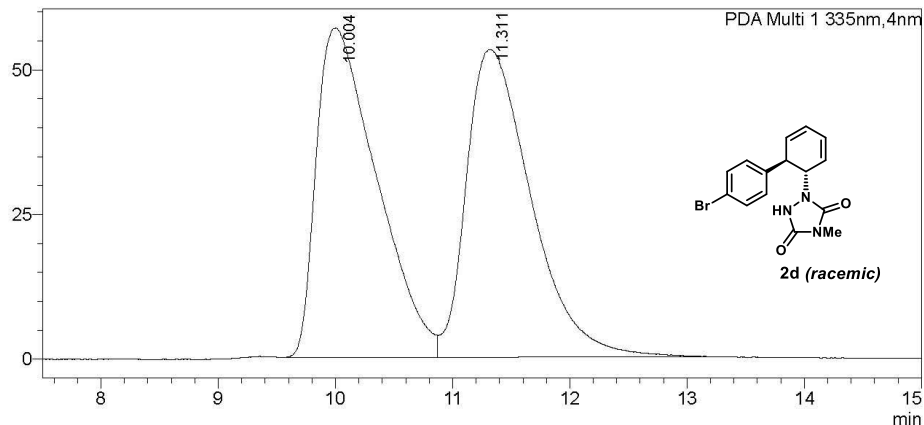

<Peak Table>

PDA Ch1 335nm

| Peak# | Ret. Time | Area    | Height | Area%   | Height% | Resolution(USP) |
|-------|-----------|---------|--------|---------|---------|-----------------|
| 1     | 10.004    | 2036925 | 56958  | 49.864  | 51.717  | --              |
| 2     | 11.311    | 2048024 | 53176  | 50.136  | 48.283  | 1.302           |
| Total |           | 4084949 | 110134 | 100.000 | 100.000 |                 |

<Chromatogram>

mAU

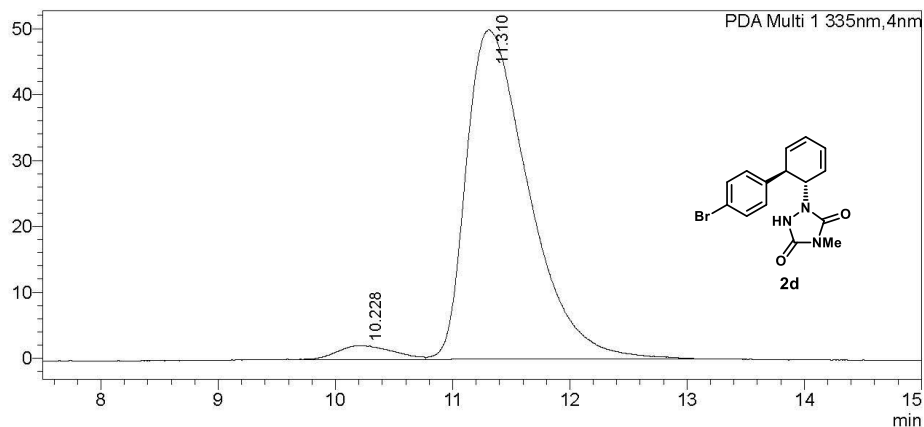

<Peak Table>

PDA Ch1 335nm

| Peak# | Ret. Time | Area    | Height | Area%   | Height% | Resolution(USP) |
|-------|-----------|---------|--------|---------|---------|-----------------|
| 1     | 10.228    | 70130   | 2132   | 3.648   | 4.091   | --              |
| 2     | 11.310    | 1852376 | 49978  | 96.352  | 95.909  | 1.144           |
| Total |           | 1922506 | 52109  | 100.000 | 100.000 |                 |



<Chromatogram>

mAU

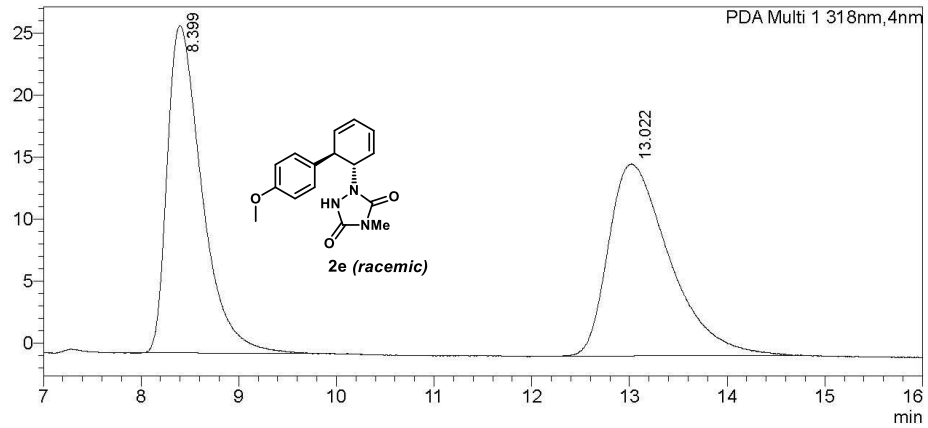

<Peak Table>

| Peak# | Ret. Time | Area    | Height | Area%   | Height% | Resolution(USP) |
|-------|-----------|---------|--------|---------|---------|-----------------|
| 1     | 8.399     | 650599  | 26375  | 49.220  | 63.038  | --              |
| 2     | 13.022    | 671221  | 15465  | 50.780  | 36.962  | 5.277           |
| Total |           | 1321821 | 41839  | 100.000 | 100.000 |                 |

<Chromatogram>

mAU

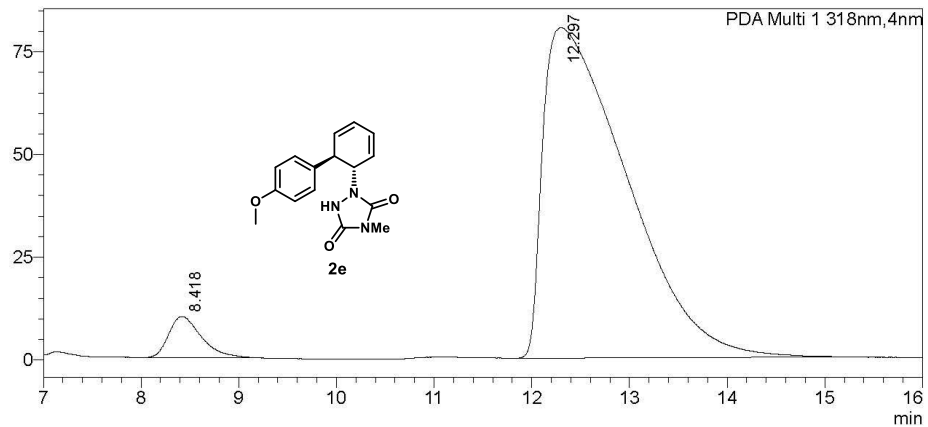

<Peak Table>

| Peak# | Ret. Time | Area    | Height | Area%   | Height% | Resolution(USP) |
|-------|-----------|---------|--------|---------|---------|-----------------|
| 1     | 8.418     | 233422  | 10045  | 4.634   | 11.099  | --              |
| 2     | 12.297    | 4803419 | 80461  | 95.366  | 88.901  | 3.494           |
| Total |           | 5036841 | 90506  | 100.000 | 100.000 |                 |

<Chromatogram>

mAU

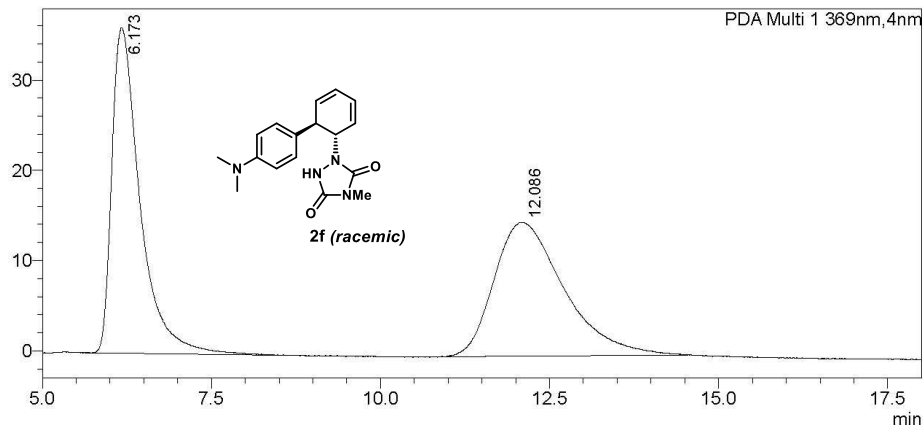

<Peak Table>

PDA Ch1 369nm

| Peak# | Ret. Time | Area    | Height | Area%   | Height% | Resolution(USP) |
|-------|-----------|---------|--------|---------|---------|-----------------|
| 1     | 6.173     | 1046796 | 36035  | 49.555  | 70.850  | --              |
| 2     | 12.086    | 1065582 | 14826  | 50.445  | 29.150  | 4.587           |
| Total |           | 2112379 | 50860  | 100.000 | 100.000 |                 |

<Chromatogram>

mAU

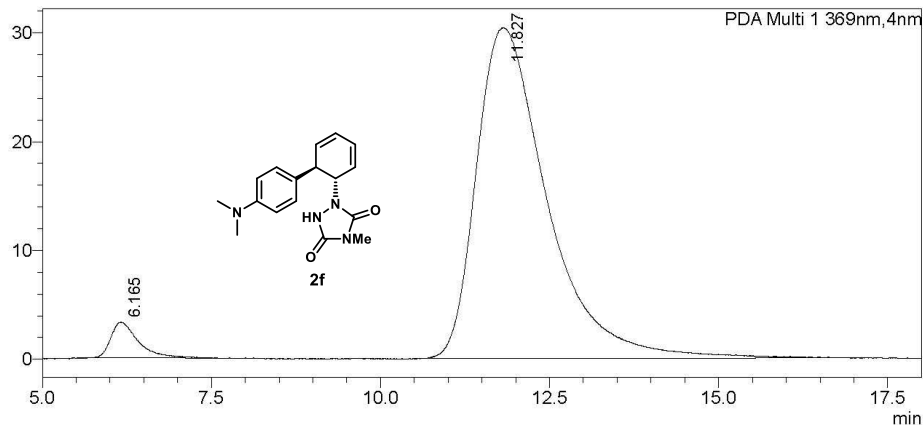

<Peak Table>

PDA Ch1 369nm

| Peak# | Ret. Time | Area    | Height | Area%   | Height% | Resolution(USP) |
|-------|-----------|---------|--------|---------|---------|-----------------|
| 1     | 6.165     | 93357   | 3287   | 4.047   | 9.756   | --              |
| 2     | 11.827    | 2213611 | 30409  | 95.953  | 90.244  | 4.520           |
| Total |           | 2306968 | 33696  | 100.000 | 100.000 |                 |

<Chromatogram>

mAU

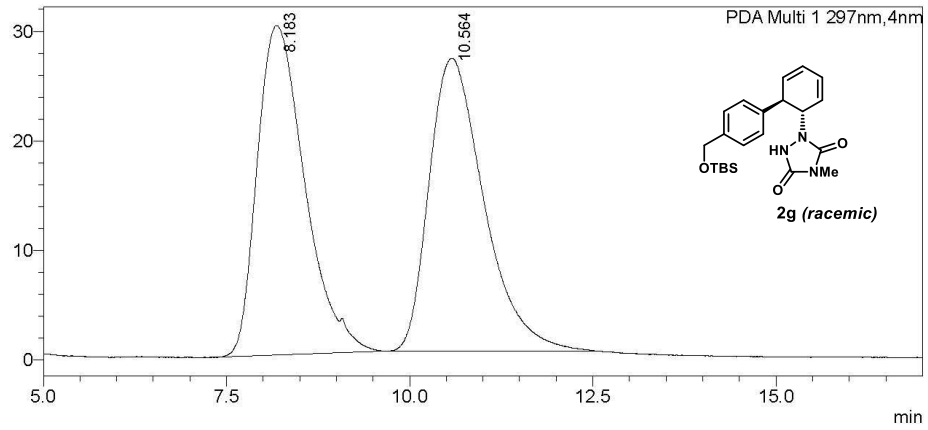

<Peak Table>

PDA Ch1 297nm

| Peak# | Ret. Time | Area    | Height | Area%   | Height% | Resolution(USP) |
|-------|-----------|---------|--------|---------|---------|-----------------|
| 1     | 8.183     | 1360917 | 30057  | 49.314  | 52.909  | --              |
| 2     | 10.564    | 1398777 | 26753  | 50.686  | 47.091  | 1.890           |
| Total |           | 2759694 | 56810  | 100.000 | 100.000 |                 |

<Chromatogram>

mAU

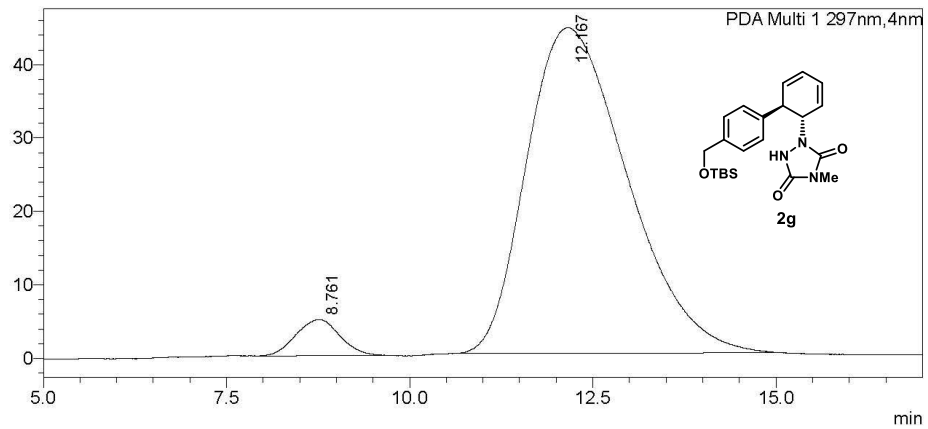

<Peak Table>

PDA Ch1 297nm

| Peak# | Ret. Time | Area    | Height | Area%   | Height% | Resolution(USP) |
|-------|-----------|---------|--------|---------|---------|-----------------|
| 1     | 8.761     | 206469  | 4942   | 4.634   | 10.025  | --              |
| 2     | 12.167    | 4248601 | 44359  | 95.366  | 89.975  | 1.868           |
| Total |           | 4455070 | 49302  | 100.000 | 100.000 |                 |

<Chromatogram>

mAU

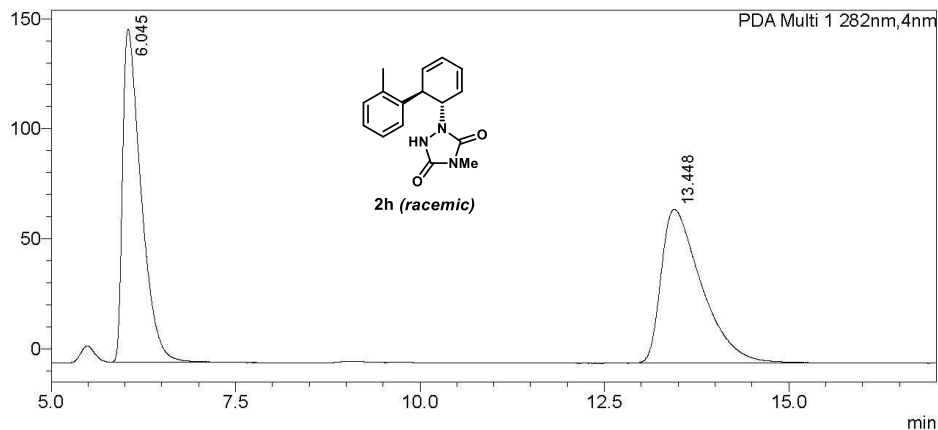

<Peak Table>

PDA Ch1 282nm

| Peak# | Ret. Time | Area    | Height | Area%   | Height% | Resolution(USP) |
|-------|-----------|---------|--------|---------|---------|-----------------|
| 1     | 6.045     | 2637066 | 151254 | 49.741  | 68.414  | --              |
| 2     | 13.448    | 2664515 | 69831  | 50.259  | 31.586  | 10.166          |
| Total |           | 5301580 | 221084 | 100.000 | 100.000 |                 |

<Chromatogram>

mAU

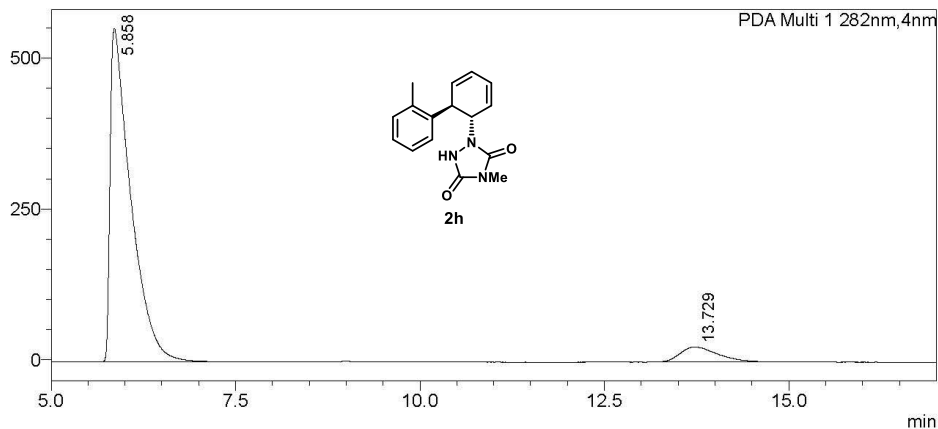

<Peak Table>

PDA Ch1 282nm

| Peak# | Ret. Time | Area     | Height | Area%   | Height% | Resolution(USP) |
|-------|-----------|----------|--------|---------|---------|-----------------|
| 1     | 5.858     | 10778992 | 552993 | 92.166  | 95.666  | --              |
| 2     | 13.729    | 916208   | 25053  | 7.834   | 4.334   | 10.755          |
| Total |           | 11695200 | 578046 | 100.000 | 100.000 |                 |

### <Chromatogram>

mAU

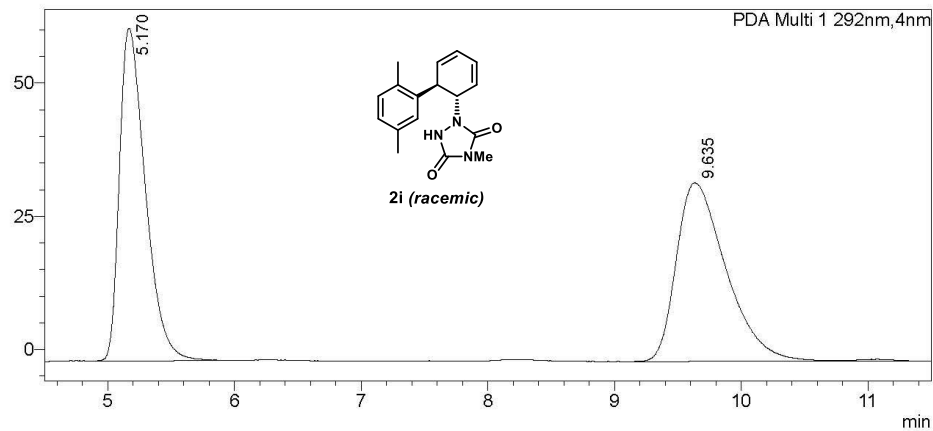

### <Peak Table>

PDA Ch1 292nm

| Peak# | Ret. Time | Area    | Height | Area%   | Height% | Resolution(USP) |
|-------|-----------|---------|--------|---------|---------|-----------------|
| 1     | 5.170     | 884770  | 62439  | 49.136  | 65.081  | --              |
| 2     | 9.635     | 915883  | 33502  | 50.864  | 34.919  | 8.166           |
| Total |           | 1800653 | 95941  | 100.000 | 100.000 |                 |

### <Chromatogram>

mAU

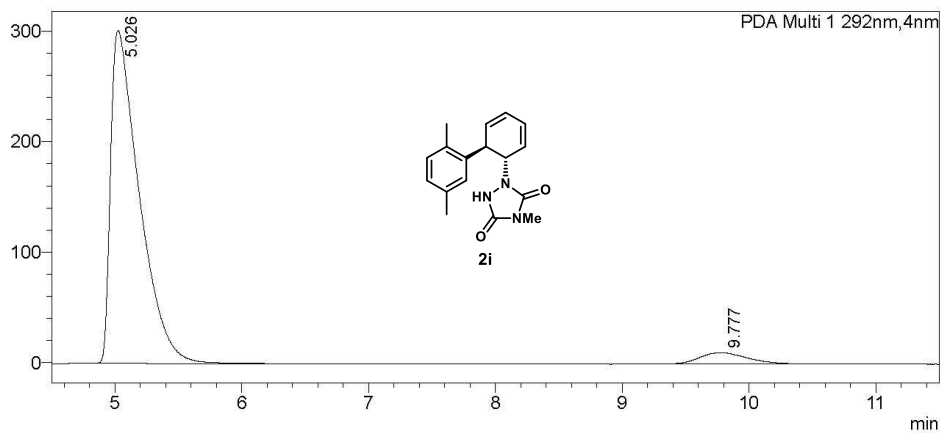

### <Peak Table>

PDA Ch1 292nm

| Peak# | Ret. Time | Area    | Height | Area%   | Height% | Resolution(USP) |
|-------|-----------|---------|--------|---------|---------|-----------------|
| 1     | 5.026     | 4719060 | 301296 | 94.221  | 96.670  | --              |
| 2     | 9.777     | 289466  | 10377  | 5.779   | 3.330   | 8.368           |
| Total |           | 5008526 | 311674 | 100.000 | 100.000 |                 |

### <Chromatogram>

mAU

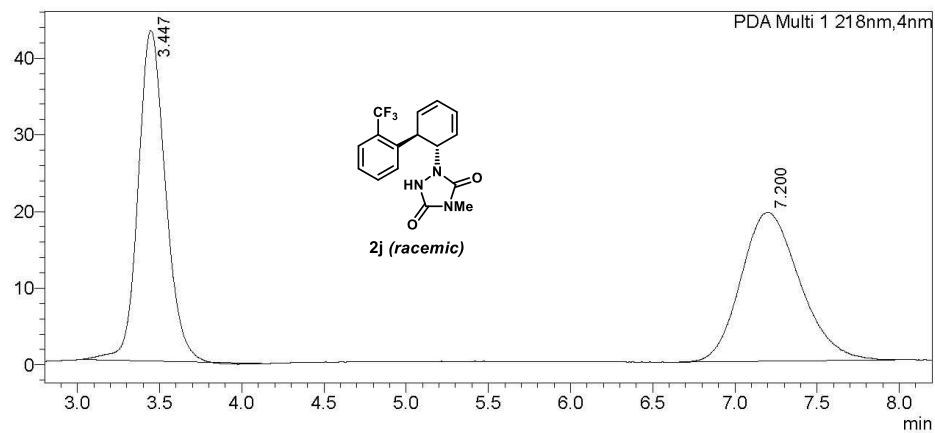

### <Peak Table>

PDA Ch1 218nm

| Peak# | Ret. Time | Area   | Height | Area%   | Height% | Resolution(USP) |
|-------|-----------|--------|--------|---------|---------|-----------------|
| 1     | 3.447     | 495736 | 43144  | 50.728  | 69.041  | --              |
| 2     | 7.200     | 481515 | 19346  | 49.272  | 30.959  | 7.757           |
| Total |           | 977251 | 62490  | 100.000 | 100.000 |                 |

### <Chromatogram>

mAU

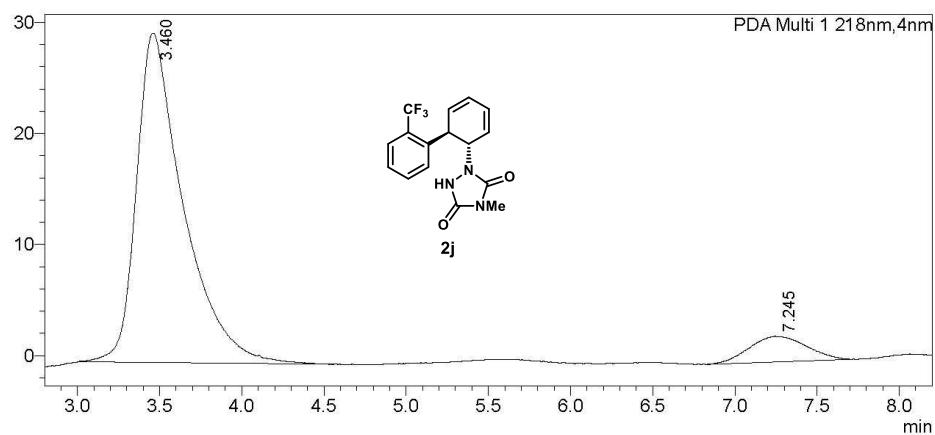

### <Peak Table>

PDA Ch1 218nm

| Peak# | Ret. Time | Area   | Height | Area%   | Height% | Resolution(USP) |
|-------|-----------|--------|--------|---------|---------|-----------------|
| 1     | 3.460     | 585954 | 29629  | 91.279  | 92.732  | --              |
| 2     | 7.245     | 55986  | 2322   | 8.721   | 7.268   | 6.539           |
| Total |           | 641939 | 31951  | 100.000 | 100.000 |                 |

<Chromatogram>

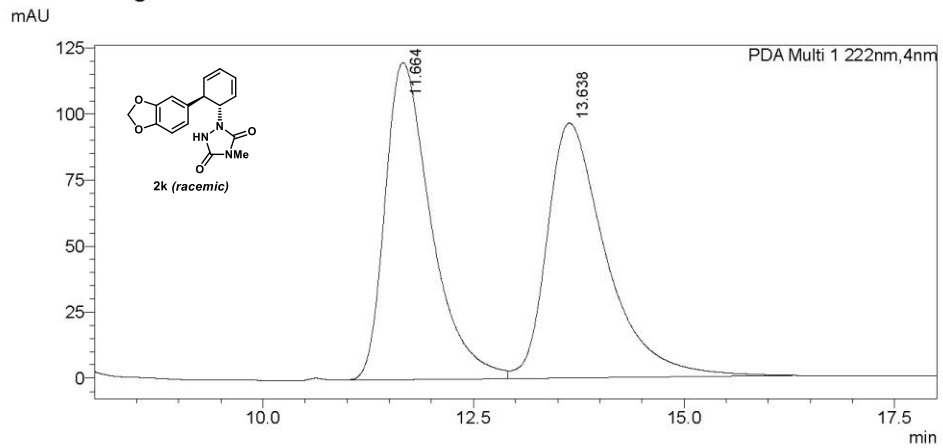

<Peak Table>

PDA Ch1 222nm

| Peak# | Ret. Time | Area    | Height | Area%   | Height% | Resolution(USP) |
|-------|-----------|---------|--------|---------|---------|-----------------|
| 1     | 11.664    | 4561233 | 119984 | 49.272  | 55.421  | --              |
| 2     | 13.638    | 4696038 | 96513  | 50.728  | 44.579  | 1.815           |
| Total |           | 9257271 | 216498 | 100.000 | 100.000 |                 |

<Chromatogram>

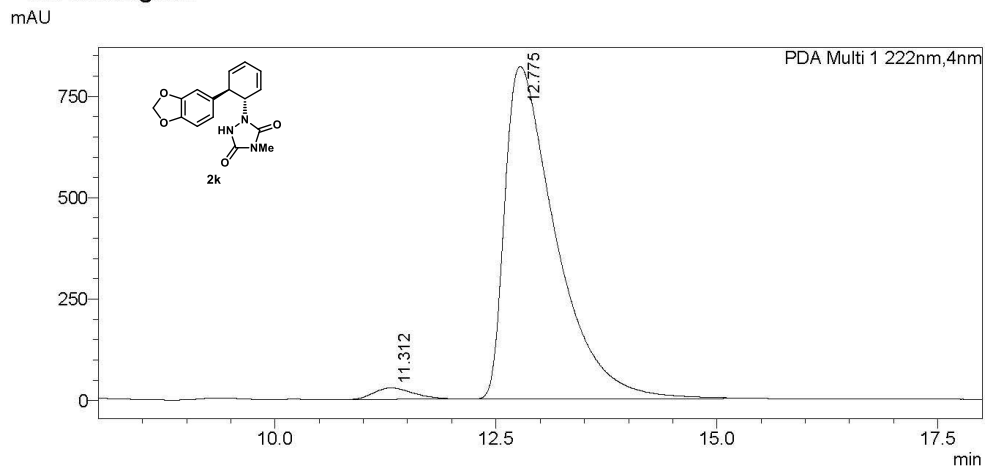

<Peak Table>

PDA Ch1 222nm

| Peak# | Ret. Time | Area     | Height | Area%   | Height% | Resolution(USP) |
|-------|-----------|----------|--------|---------|---------|-----------------|
| 1     | 11.312    | 867006   | 28188  | 2.560   | 3.322   | --              |
| 2     | 12.775    | 32997689 | 820369 | 97.440  | 96.678  | 1.590           |
| Total |           | 33864695 | 848557 | 100.000 | 100.000 |                 |

### <Chromatogram>

mAU

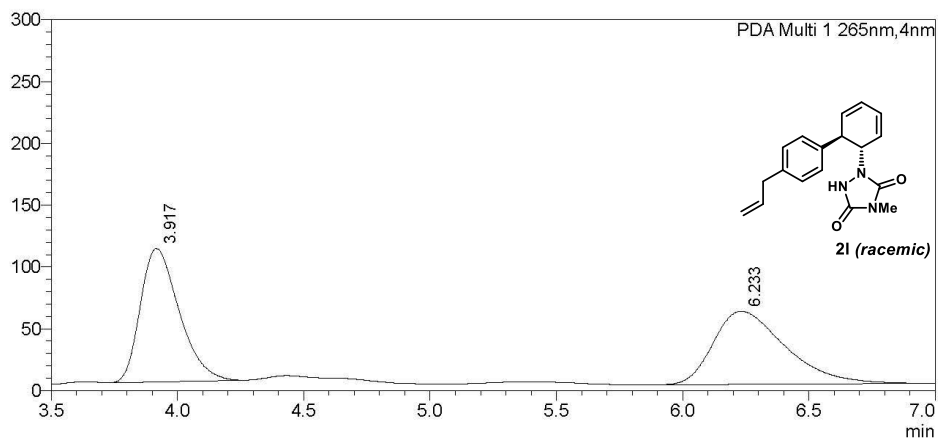

### <Peak Table>

PDA Ch1 265nm

| Peak# | Ret. Time | Area    | Height | Area%   | Height% | Resolution(USP) |
|-------|-----------|---------|--------|---------|---------|-----------------|
| 1     | 3.917     | 1149421 | 107972 | 49.484  | 64.577  | --              |
| 2     | 6.233     | 1173386 | 59227  | 50.516  | 35.423  | 5.688           |
| Total |           | 2322807 | 167199 | 100.000 | 100.000 |                 |

### <Chromatogram>

mAU

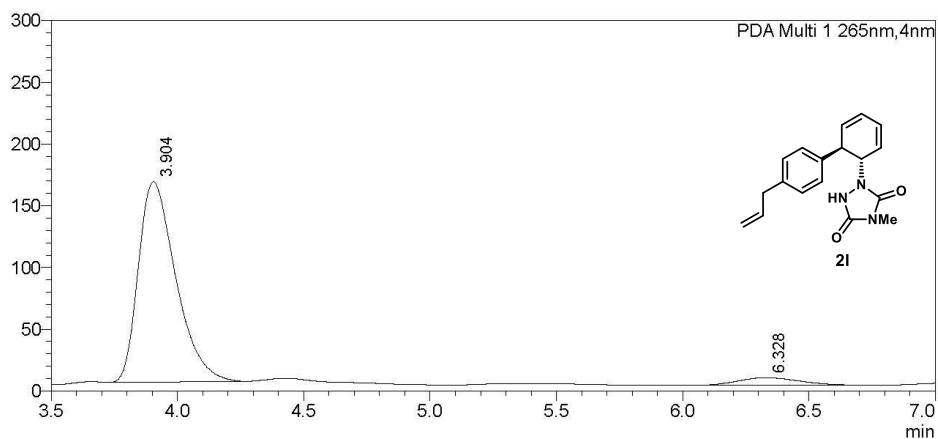

### <Peak Table>

PDA Ch1 265nm

| Peak# | Ret. Time | Area    | Height | Area%   | Height% | Resolution(USP) |
|-------|-----------|---------|--------|---------|---------|-----------------|
| 1     | 3.904     | 1668851 | 162573 | 93.857  | 96.290  | --              |
| 2     | 6.328     | 109230  | 6264   | 6.143   | 3.710   | 6.425           |
| Total |           | 1778081 | 168837 | 100.000 | 100.000 |                 |



<Chromatogram>

mAU

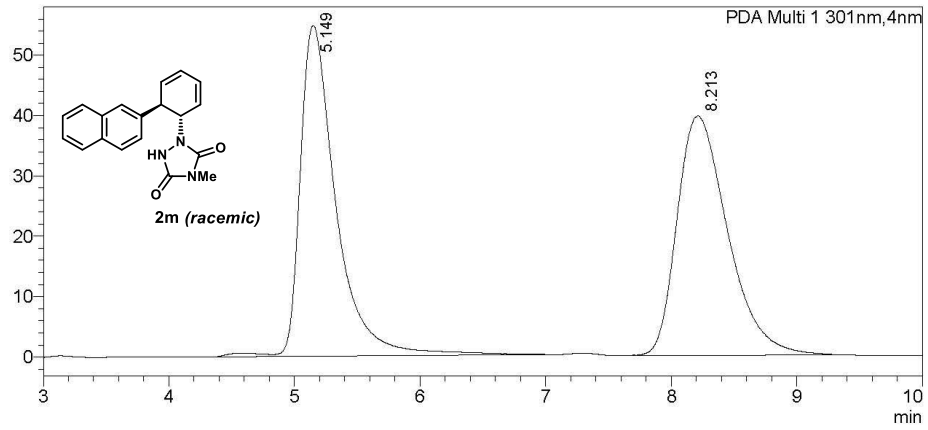

<Peak Table>

| Peak# | Ret. Time | Area    | Height | Area%   | Height% | Resolution(USP) |
|-------|-----------|---------|--------|---------|---------|-----------------|
| 1     | 5.149     | 1090245 | 54750  | 49.599  | 57.983  | --              |
| 2     | 8.213     | 1107893 | 39674  | 50.401  | 42.017  | 5.064           |
| Total |           | 2198138 | 94424  | 100.000 | 100.000 |                 |

<Chromatogram>

mAU

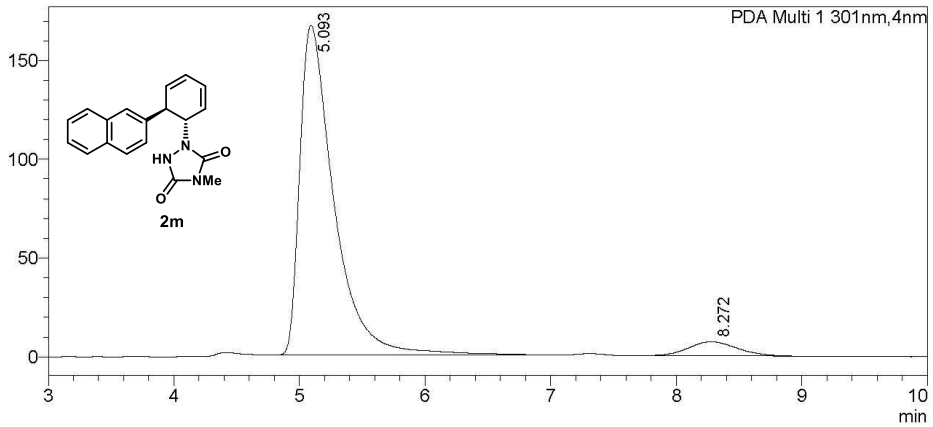

<Peak Table>

| Peak# | Ret. Time | Area    | Height | Area%   | Height% | Resolution(USP) |
|-------|-----------|---------|--------|---------|---------|-----------------|
| 1     | 5.093     | 3148132 | 166680 | 94.176  | 95.882  | --              |
| 2     | 8.272     | 194683  | 7159   | 5.824   | 4.118   | 5.338           |
| Total |           | 3342816 | 173840 | 100.000 | 100.000 |                 |

### <Chromatogram>

mAU

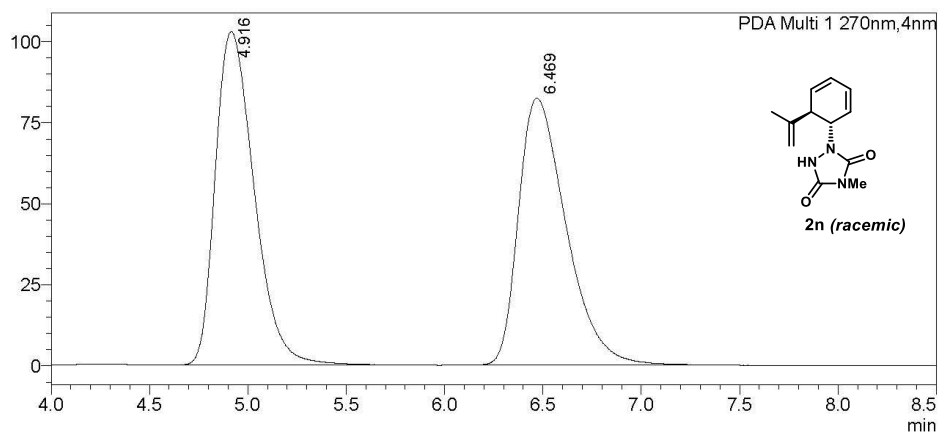

### <Peak Table>

PDA Ch1 270nm

| Peak# | Ret. Time | Area    | Height | Area%   | Height% | Resolution(USP) |
|-------|-----------|---------|--------|---------|---------|-----------------|
| 1     | 4.916     | 1415480 | 102986 | 50.414  | 55.559  | --              |
| 2     | 6.469     | 1392241 | 82378  | 49.586  | 44.441  | 3.831           |
| Total |           | 2807721 | 185364 | 100.000 | 100.000 |                 |

### <Chromatogram>

mAU

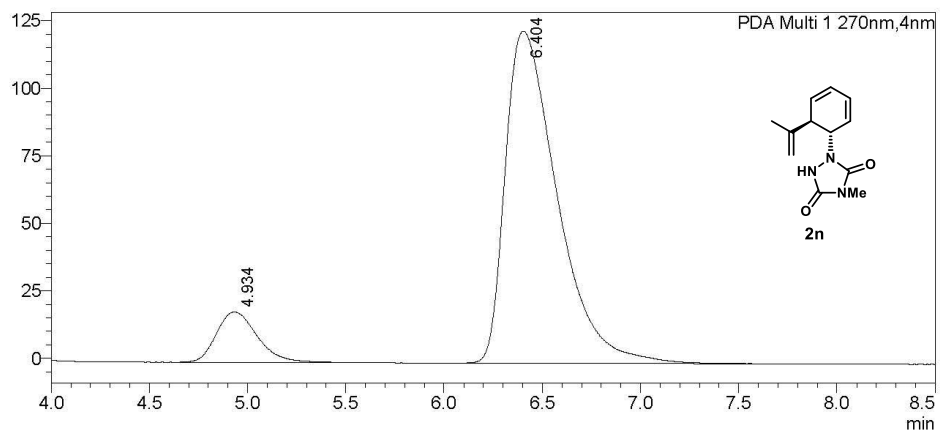

### <Peak Table>

PDA Ch1 270nm

| Peak# | Ret. Time | Area    | Height | Area%   | Height% | Resolution(USP) |
|-------|-----------|---------|--------|---------|---------|-----------------|
| 1     | 4.934     | 269975  | 18662  | 10.696  | 13.184  | --              |
| 2     | 6.404     | 2254206 | 122890 | 89.304  | 86.816  | 3.418           |
| Total |           | 2524182 | 141553 | 100.000 | 100.000 |                 |

### <Chromatogram>

mAU

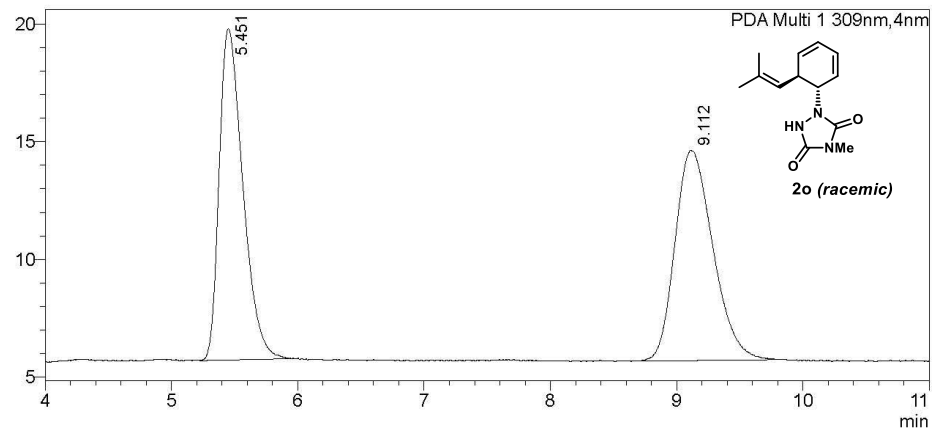

### <Peak Table>

PDA Ch1 309nm

| Peak# | Ret. Time | Area   | Height | Area%   | Height% | Resolution(USP) |
|-------|-----------|--------|--------|---------|---------|-----------------|
| 1     | 5.451     | 182870 | 14091  | 49.512  | 61.185  | --              |
| 2     | 9.112     | 186475 | 8939   | 50.488  | 38.815  | 8.058           |
| Total |           | 369344 | 23030  | 100.000 | 100.000 |                 |

### <Chromatogram>

mAU

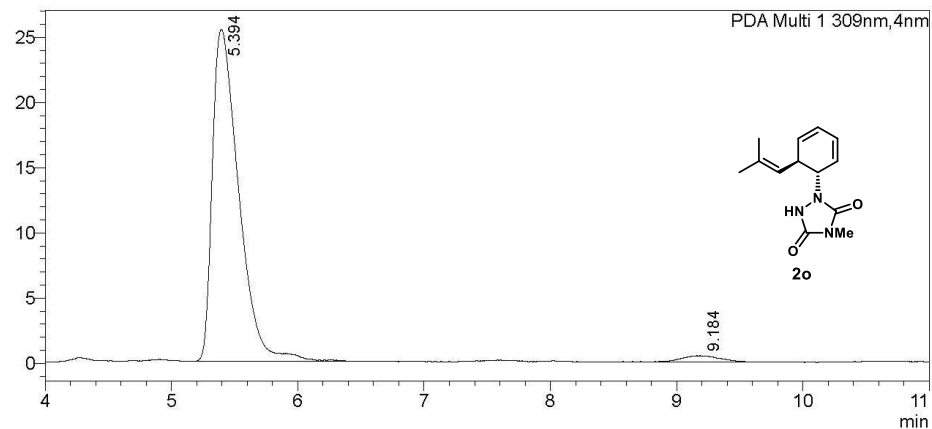

### <Peak Table>

PDA Ch1 309nm

| Peak# | Ret. Time | Area   | Height | Area%   | Height% | Resolution(USP) |
|-------|-----------|--------|--------|---------|---------|-----------------|
| 1     | 5.394     | 368627 | 25486  | 97.454  | 98.167  | --              |
| 2     | 9.184     | 9631   | 476    | 2.546   | 1.833   | 8.033           |
| Total |           | 378258 | 25962  | 100.000 | 100.000 |                 |

<Chromatogram>

mAU

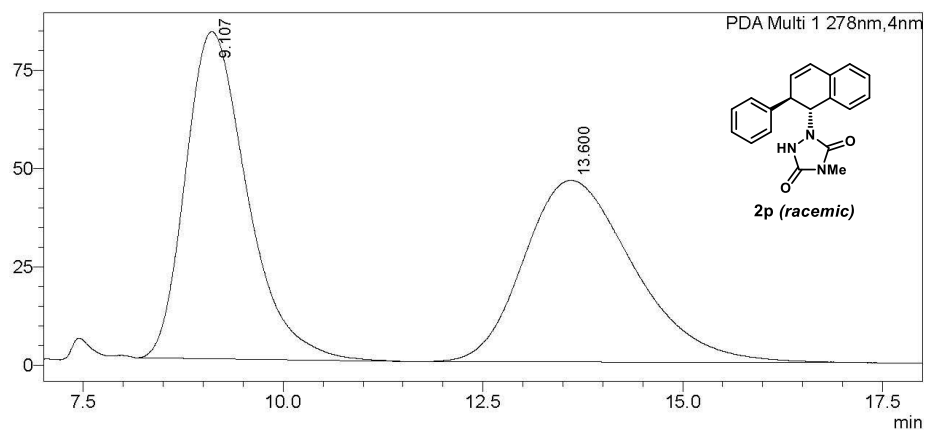

<Peak Table>

PDA Ch1 278nm

| Peak# | Ret. Time | Area    | Height | Area%   | Height% | Resolution(USP) |
|-------|-----------|---------|--------|---------|---------|-----------------|
| 1     | 9.107     | 4474139 | 83244  | 50.321  | 64.284  | --              |
| 2     | 13.600    | 4416982 | 46249  | 49.679  | 35.716  | 2.317           |
| Total |           | 8891120 | 129494 | 100.000 | 100.000 |                 |

<Chromatogram>

mAU

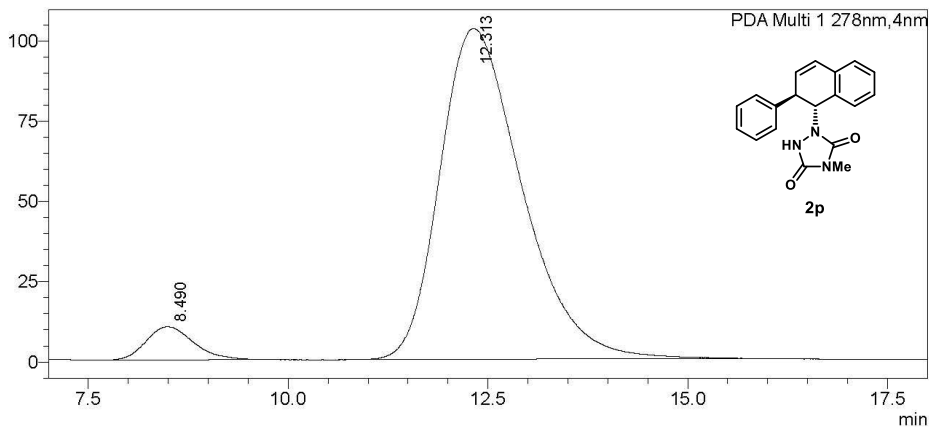

<Peak Table>

PDA Ch1 278nm

| Peak# | Ret. Time | Area    | Height | Area%   | Height% | Resolution(USP) |
|-------|-----------|---------|--------|---------|---------|-----------------|
| 1     | 8.490     | 426497  | 10372  | 5.454   | 9.145   | --              |
| 2     | 12.313    | 7392936 | 103040 | 94.546  | 90.855  | 2.597           |
| Total |           | 7819433 | 113412 | 100.000 | 100.000 |                 |

## 7. Crystallographic Data

### 7-1. Crystallographic Data for compound 2p

Single crystals of compound **2p** were obtained by slow crystallization from diethyl ether. A suitable crystal was selected and diffraction data were collected on a Bruker D8 Venture/Photon 100 diffractometer. The crystal was kept at 99.98 K during data collection. The Flack parameter calculated based on the data set is 0, with the error of 6. Thus, the absolute stereochemistry could not be determined.

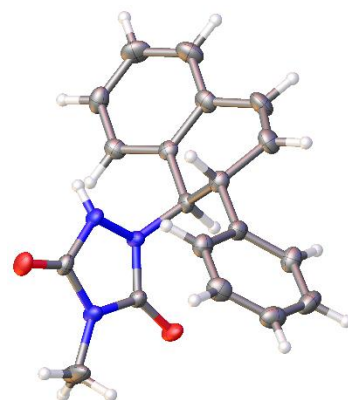

**Table 1 Crystal data and structure refinement for compound 2p.**

|                                             |                                                               |
|---------------------------------------------|---------------------------------------------------------------|
| Identification code                         | CCDC 1822240                                                  |
| Empirical formula                           | C <sub>19</sub> H <sub>17</sub> N <sub>3</sub> O <sub>2</sub> |
| Formula weight                              | 319.35                                                        |
| Temperature/K                               | 99.98                                                         |
| Crystal system                              | orthorhombic                                                  |
| Space group                                 | P2 <sub>1</sub> 2 <sub>1</sub> 2 <sub>1</sub>                 |
| a/Å                                         | 5.9911(4)                                                     |
| b/Å                                         | 14.3103(11)                                                   |
| c/Å                                         | 18.8938(13)                                                   |
| α/°                                         | 90                                                            |
| β/°                                         | 90                                                            |
| γ/°                                         | 90                                                            |
| Volume/Å <sup>3</sup>                       | 1619.8(2)                                                     |
| Z                                           | 4                                                             |
| ρ <sub>calc</sub> /cm <sup>3</sup>          | 1.310                                                         |
| μ/mm <sup>-1</sup>                          | 0.703                                                         |
| F(000)                                      | 672.0                                                         |
| Crystal size/mm <sup>3</sup>                | 0.246 × 0.136 × 0.097                                         |
| Radiation                                   | CuKα (λ = 1.54178)                                            |
| 2θ range for data collection/°              | 7.75 to 136.95                                                |
| Index ranges                                | -7 ≤ h ≤ 7, -12 ≤ k ≤ 17, -19 ≤ l ≤ 22                        |
| Reflections collected                       | 7574                                                          |
| Independent reflections                     | 2895 [R <sub>int</sub> = 0.0518, R <sub>sigma</sub> = 0.0548] |
| Data/restraints/parameters                  | 2895/0/222                                                    |
| Goodness-of-fit on F <sup>2</sup>           | 1.052                                                         |
| Final R indexes [I ≥ 2σ (I)]                | R <sub>1</sub> = 0.0618, wR <sub>2</sub> = 0.1469             |
| Final R indexes [all data]                  | R <sub>1</sub> = 0.0631, wR <sub>2</sub> = 0.1478             |
| Largest diff. peak/hole / e Å <sup>-3</sup> | 0.26/-0.24                                                    |
| Flack parameter                             | 0.0(6)                                                        |

## 7-2. Crystallographic Data for compound 3e

Single crystals of compound **3e** were obtained by slow crystallization from diethyl ether. A suitable crystal was selected and diffraction data were collected on a Bruker APEX-II CCD diffractometer. The crystal was kept at 100.15 K during data collection.

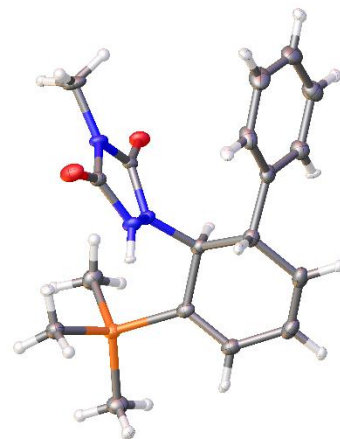

**Table 1 Crystal data and structure refinement for compound 3e.**

|                                             |                                                                  |
|---------------------------------------------|------------------------------------------------------------------|
| Identification code                         | CCDC 1822241                                                     |
| Empirical formula                           | C <sub>18</sub> H <sub>23</sub> N <sub>3</sub> O <sub>2</sub> Si |
| Formula weight                              | 341.48                                                           |
| Temperature/K                               | 100.15                                                           |
| Crystal system                              | monoclinic                                                       |
| Space group                                 | P2 <sub>1</sub> /c                                               |
| a/Å                                         | 11.5544(18)                                                      |
| b/Å                                         | 6.1514(9)                                                        |
| c/Å                                         | 25.784(4)                                                        |
| α/°                                         | 90                                                               |
| β/°                                         | 93.021(8)                                                        |
| γ/°                                         | 90                                                               |
| Volume/Å <sup>3</sup>                       | 1830.0(5)                                                        |
| Z                                           | 4                                                                |
| ρ <sub>calc</sub> /cm <sup>3</sup>          | 1.239                                                            |
| μ/mm <sup>-1</sup>                          | 0.143                                                            |
| F(000)                                      | 728.0                                                            |
| Crystal size/mm <sup>3</sup>                | 0.306 × 0.141 × 0.064                                            |
| Radiation                                   | MoKα (λ = 0.71073)                                               |
| 2θ range for data collection/°              | 6.33 to 56.876                                                   |
| Index ranges                                | -15 ≤ h ≤ 14, -8 ≤ k ≤ 8, -34 ≤ l ≤ 34                           |
| Reflections collected                       | 48329                                                            |
| Independent reflections                     | 4553 [R <sub>int</sub> = 0.0692, R <sub>sigma</sub> = 0.0373]    |
| Data/restraints/parameters                  | 4553/0/238                                                       |
| Goodness-of-fit on F <sup>2</sup>           | 1.040                                                            |
| Final R indexes [I ≥ 2σ (I)]                | R <sub>1</sub> = 0.0402, wR <sub>2</sub> = 0.0883                |
| Final R indexes [all data]                  | R <sub>1</sub> = 0.0616, wR <sub>2</sub> = 0.0979                |
| Largest diff. peak/hole / e Å <sup>-3</sup> | 0.31/-0.24                                                       |

## 8. NMR Spectra

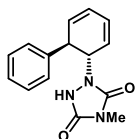

**2a**

(<sup>1</sup>H NMR, CDCl<sub>3</sub>, 500 MHz)

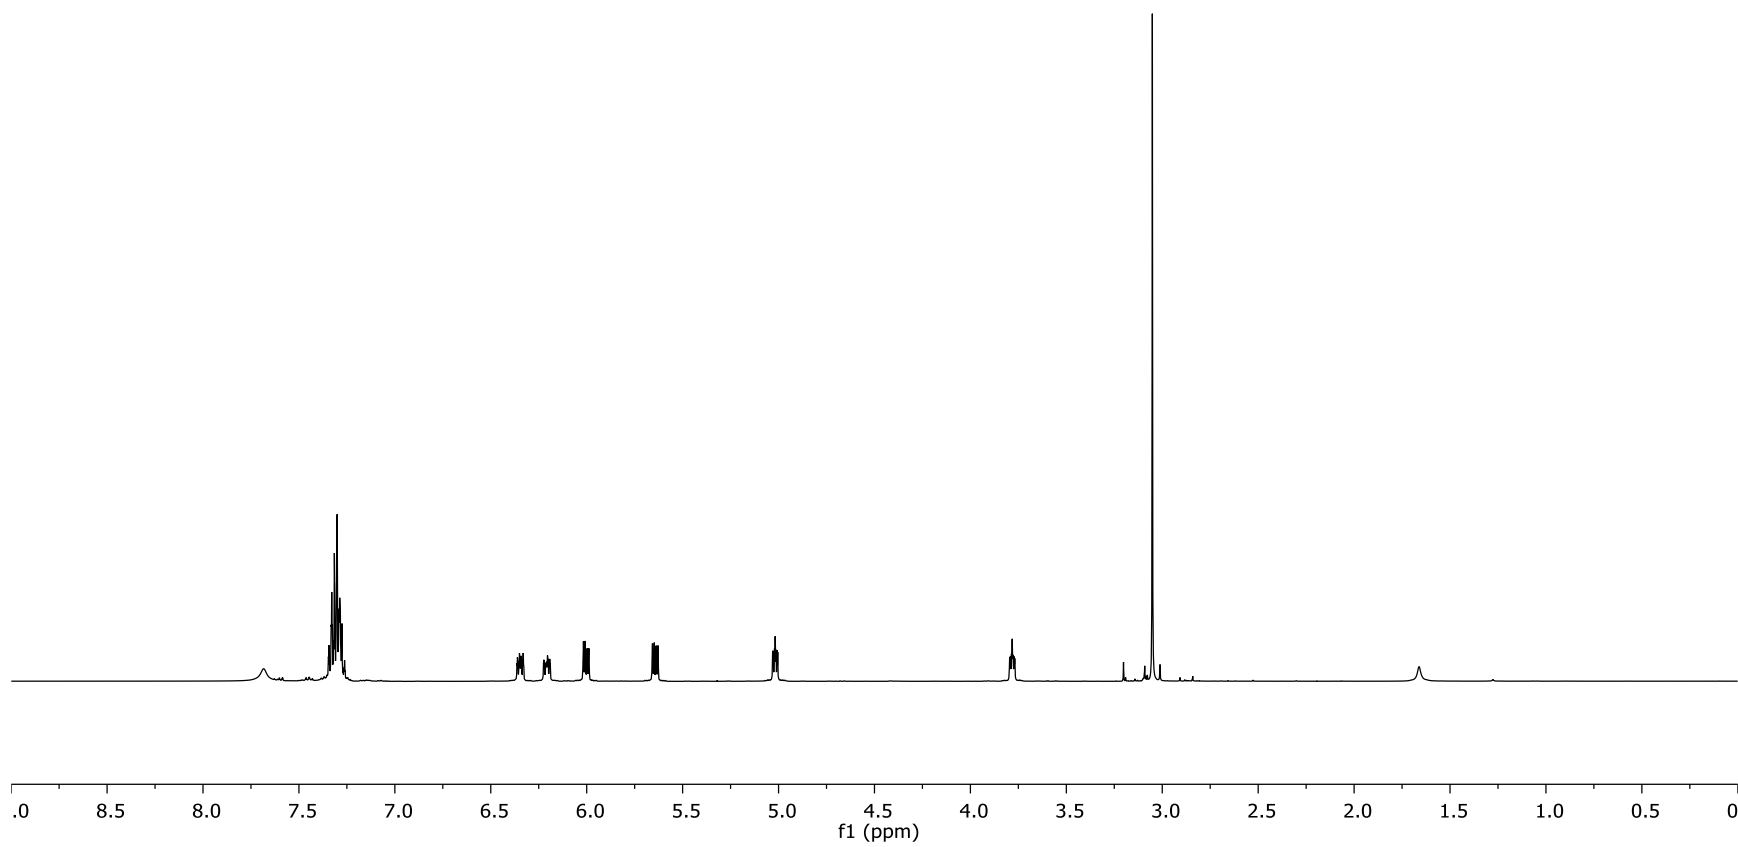

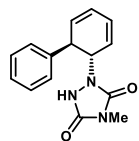

2a

(<sup>13</sup>C NMR, CDCl<sub>3</sub>, 126 MHz)

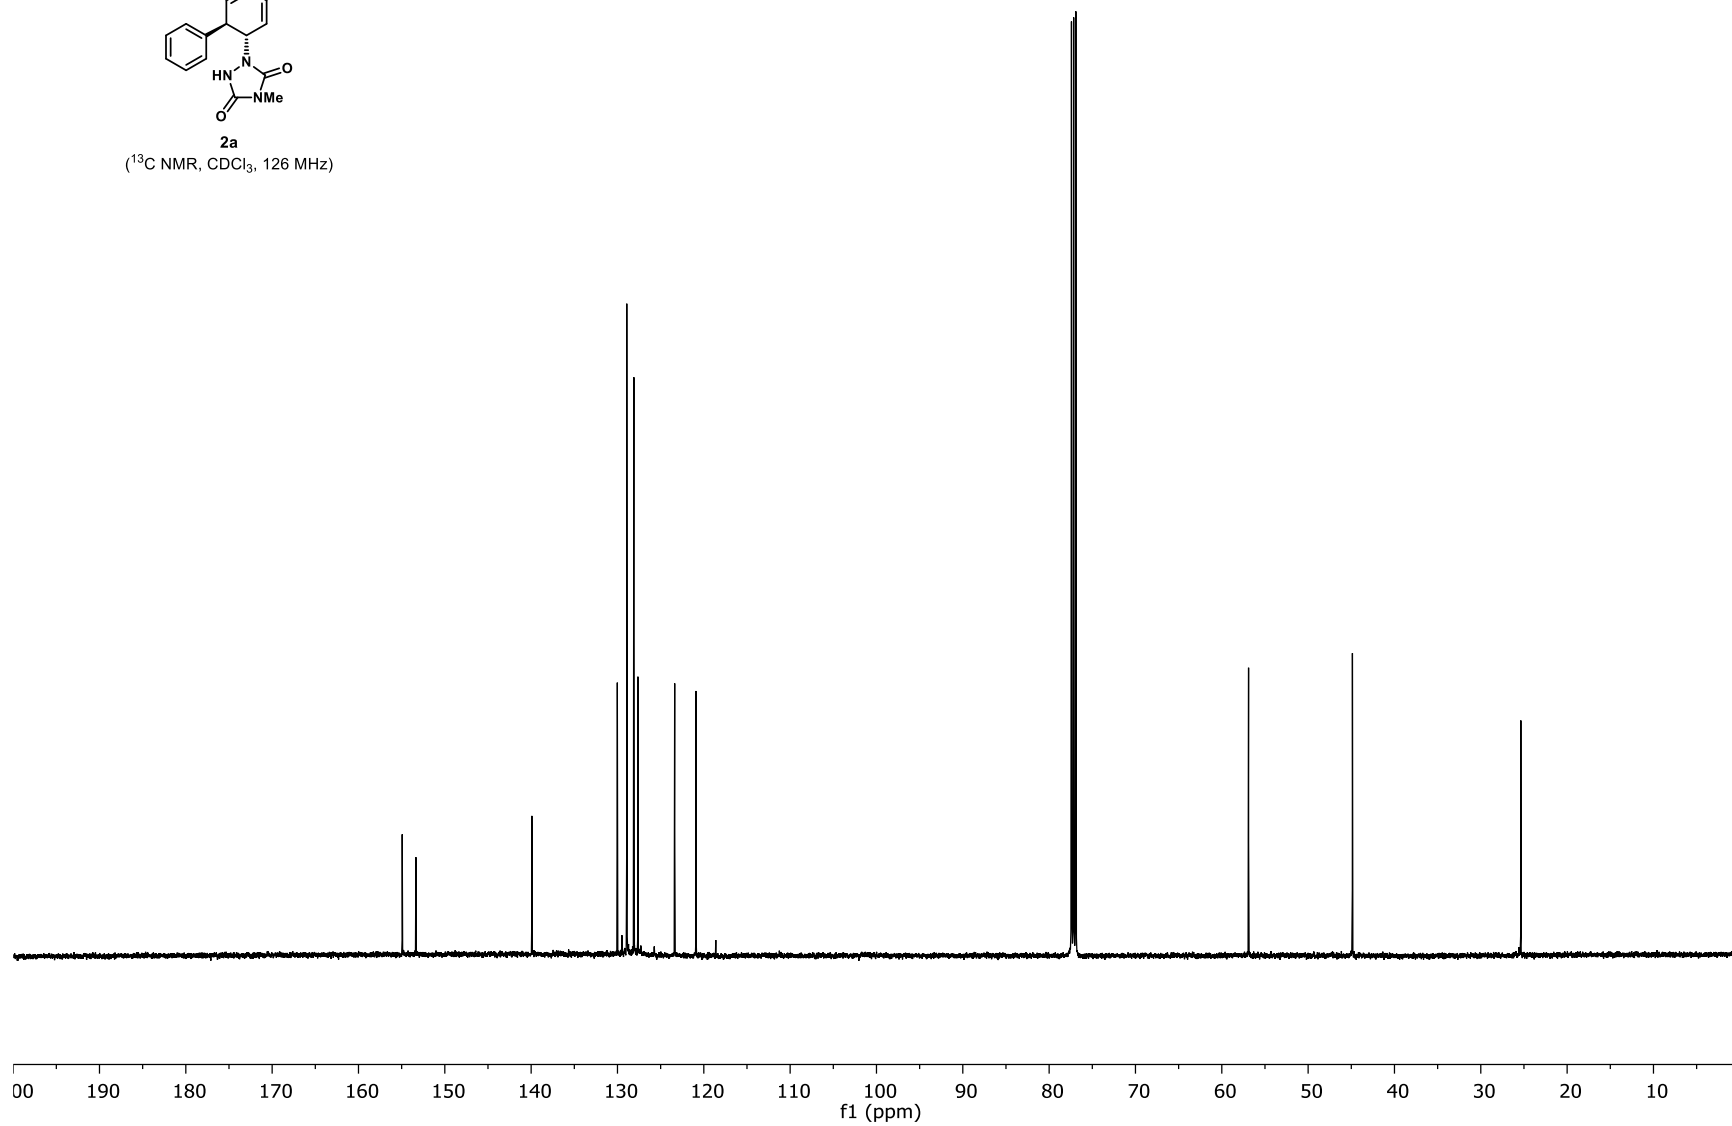



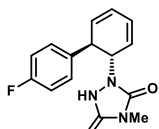

**2b**

(<sup>1</sup>H NMR, CDCl<sub>3</sub>, 500 MHz)

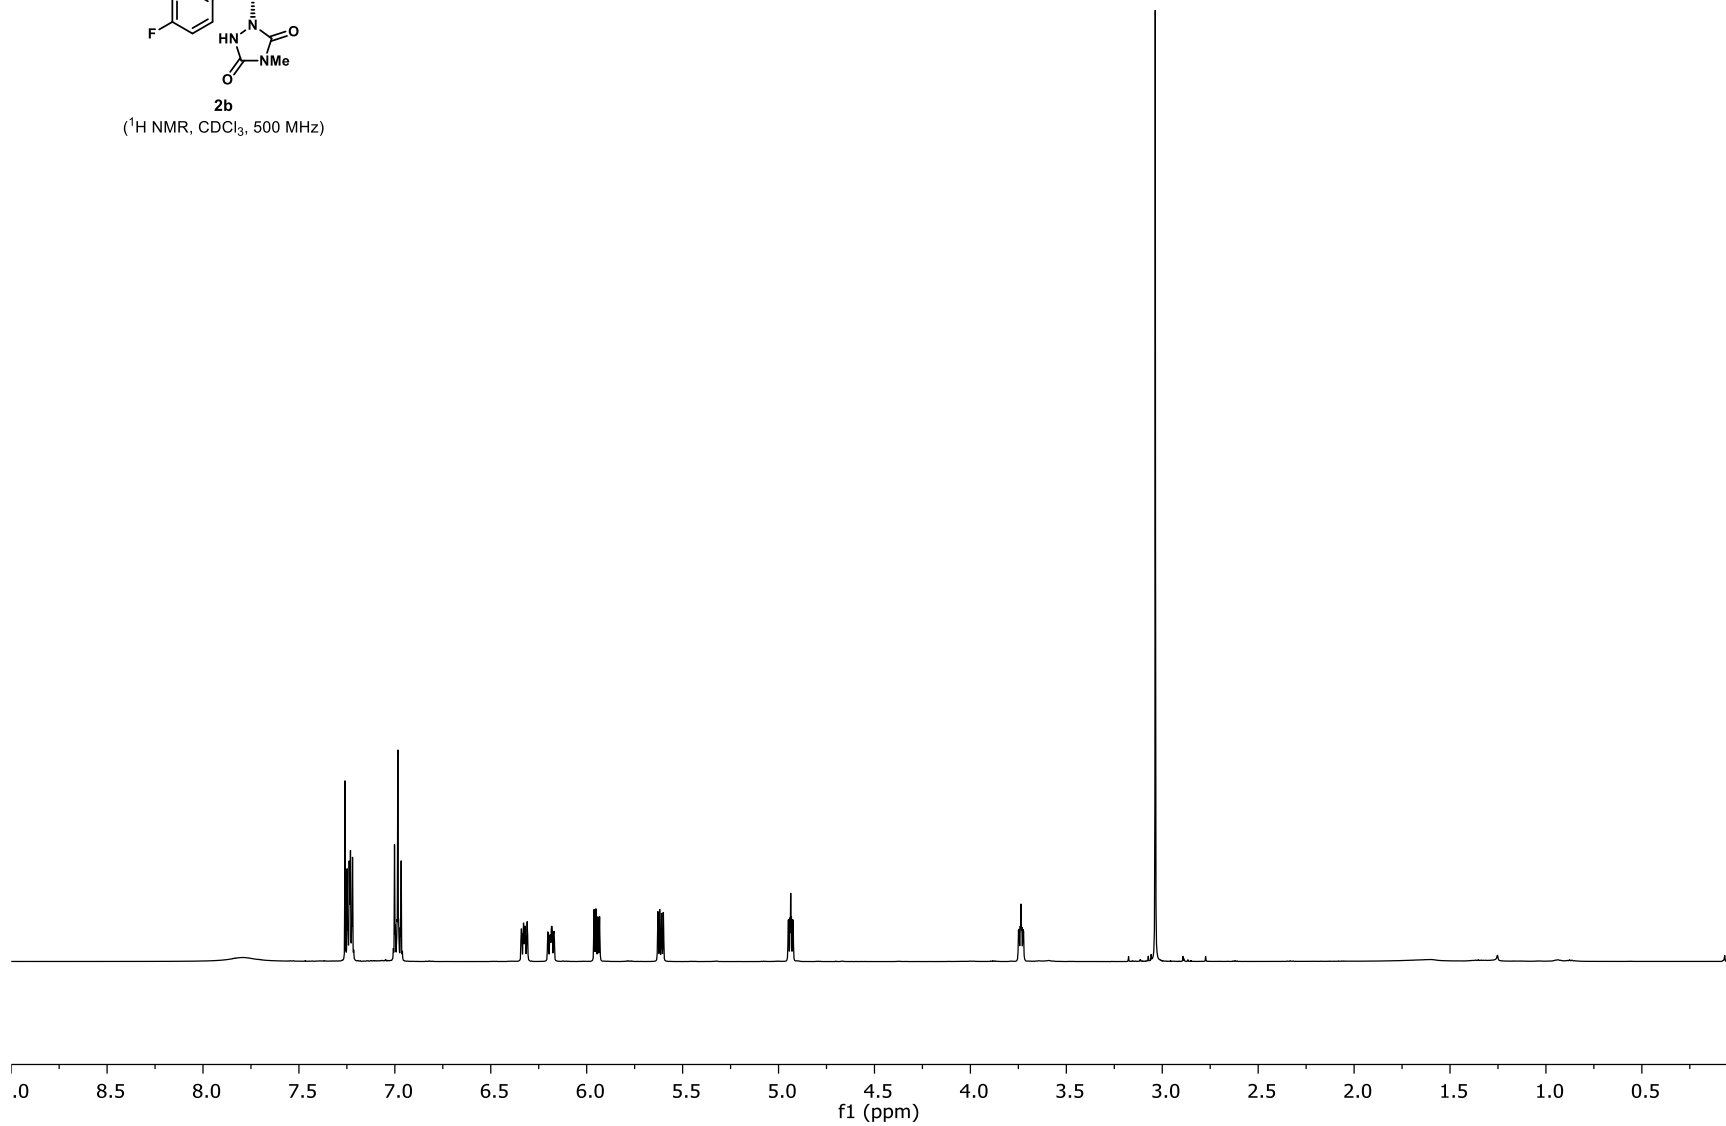

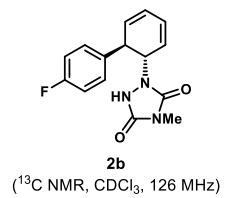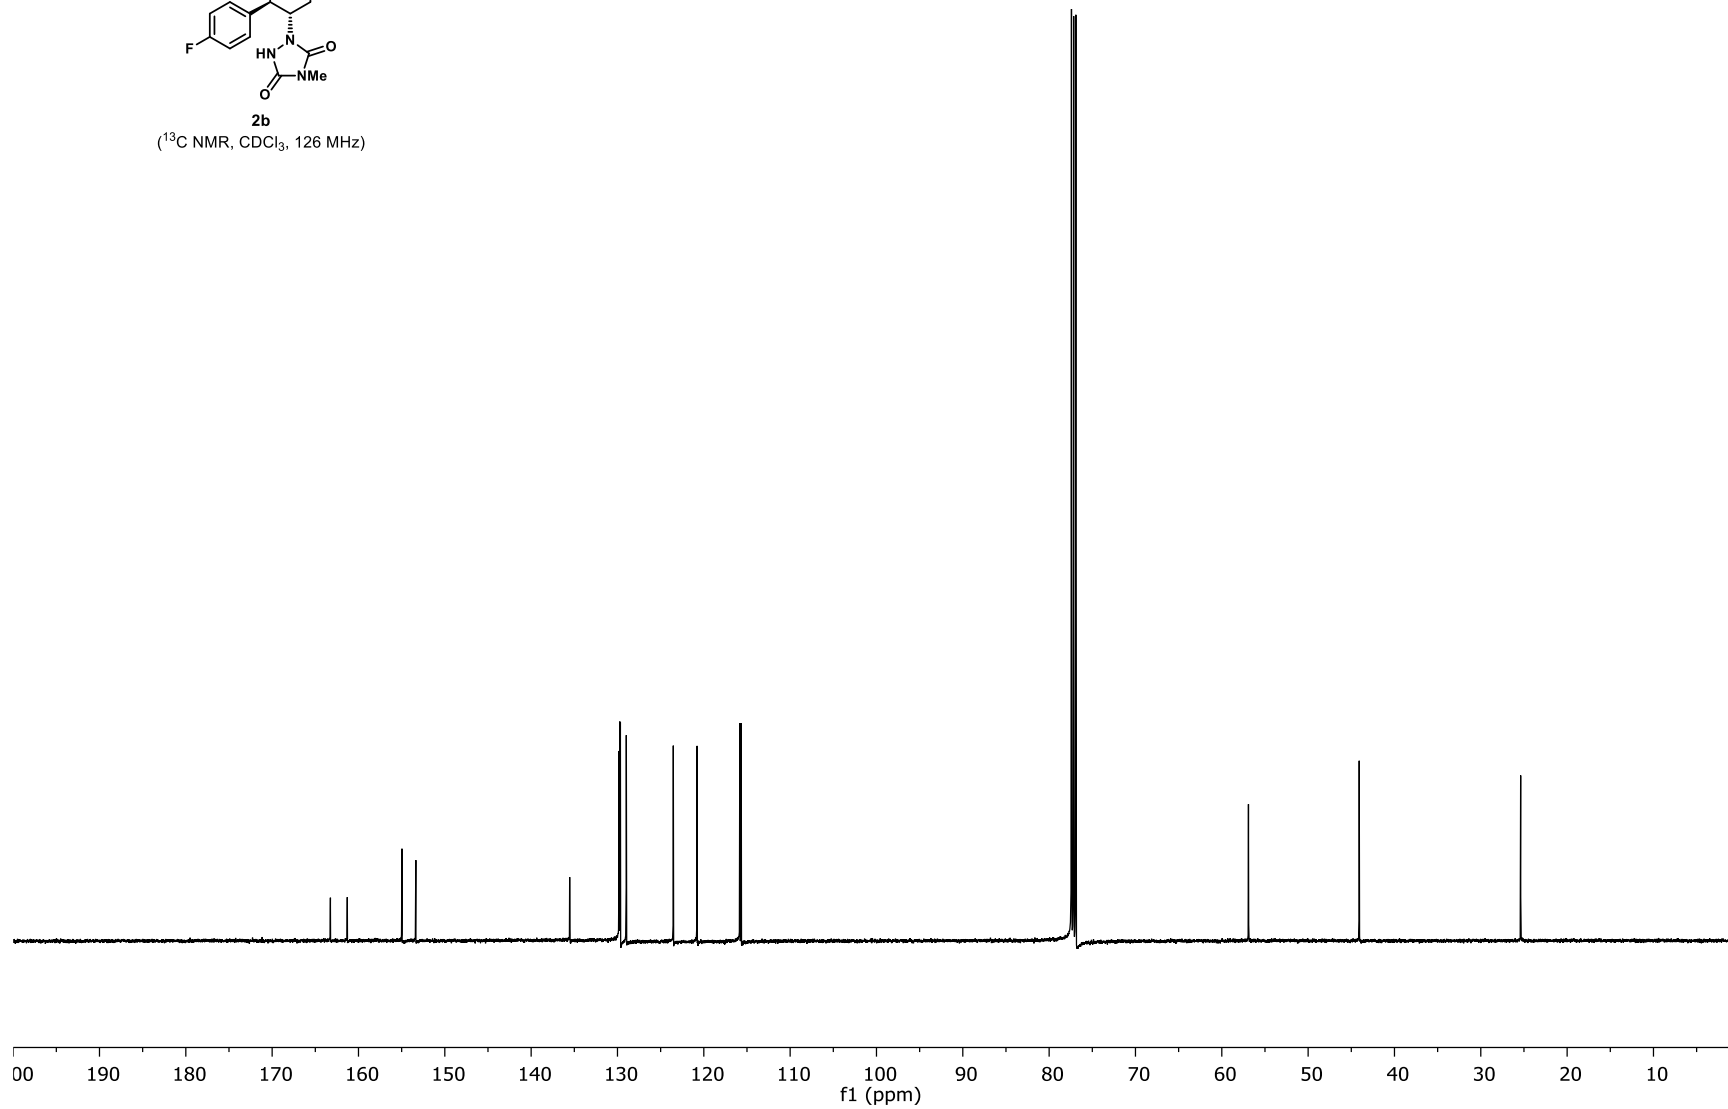

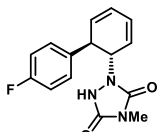

2b

(<sup>19</sup>F NMR, CDCl<sub>3</sub>, 471 MHz)

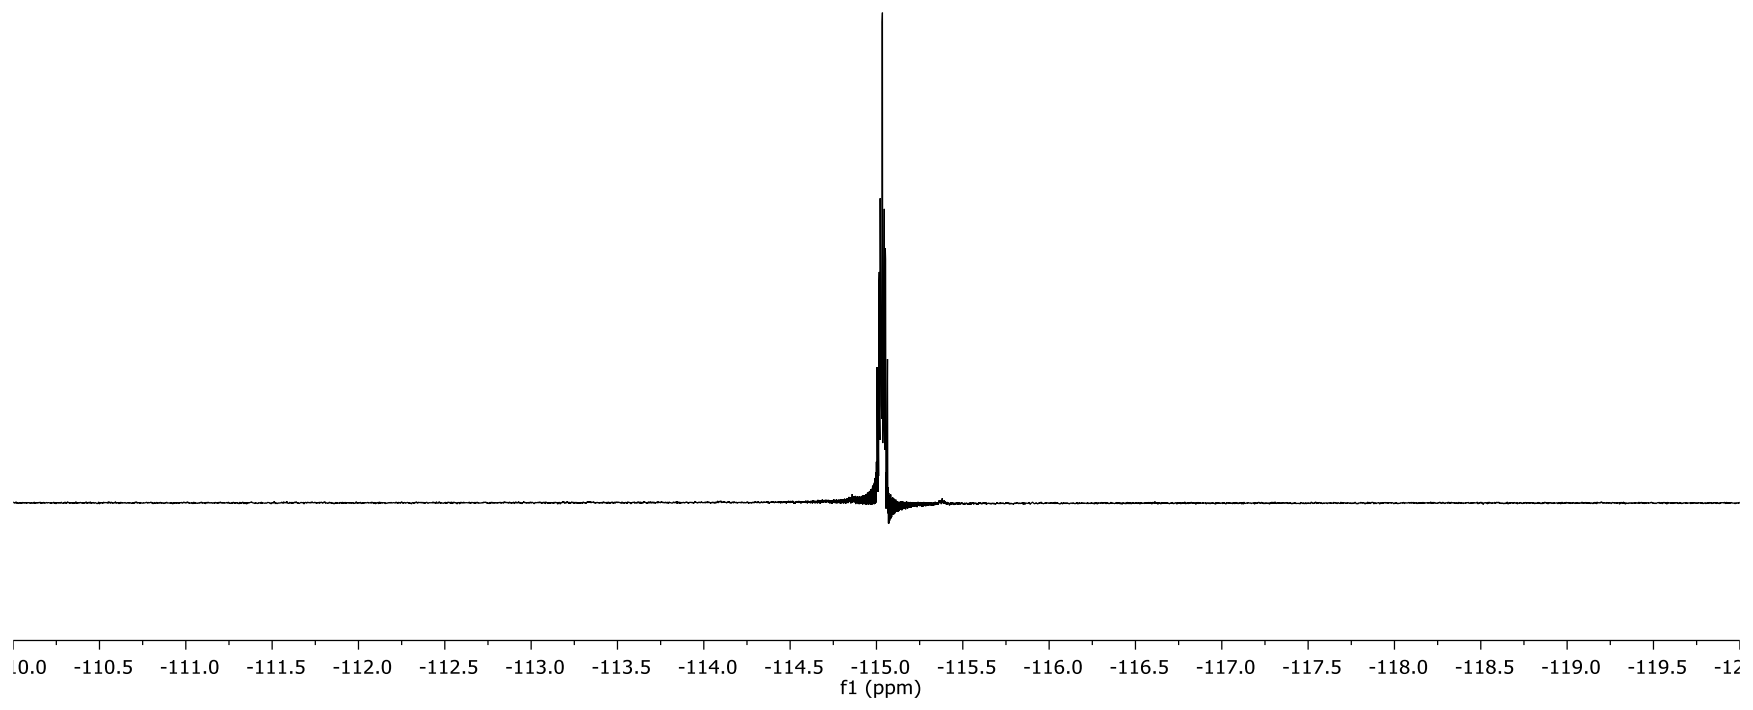

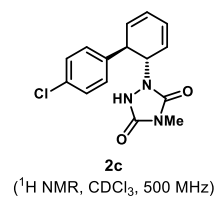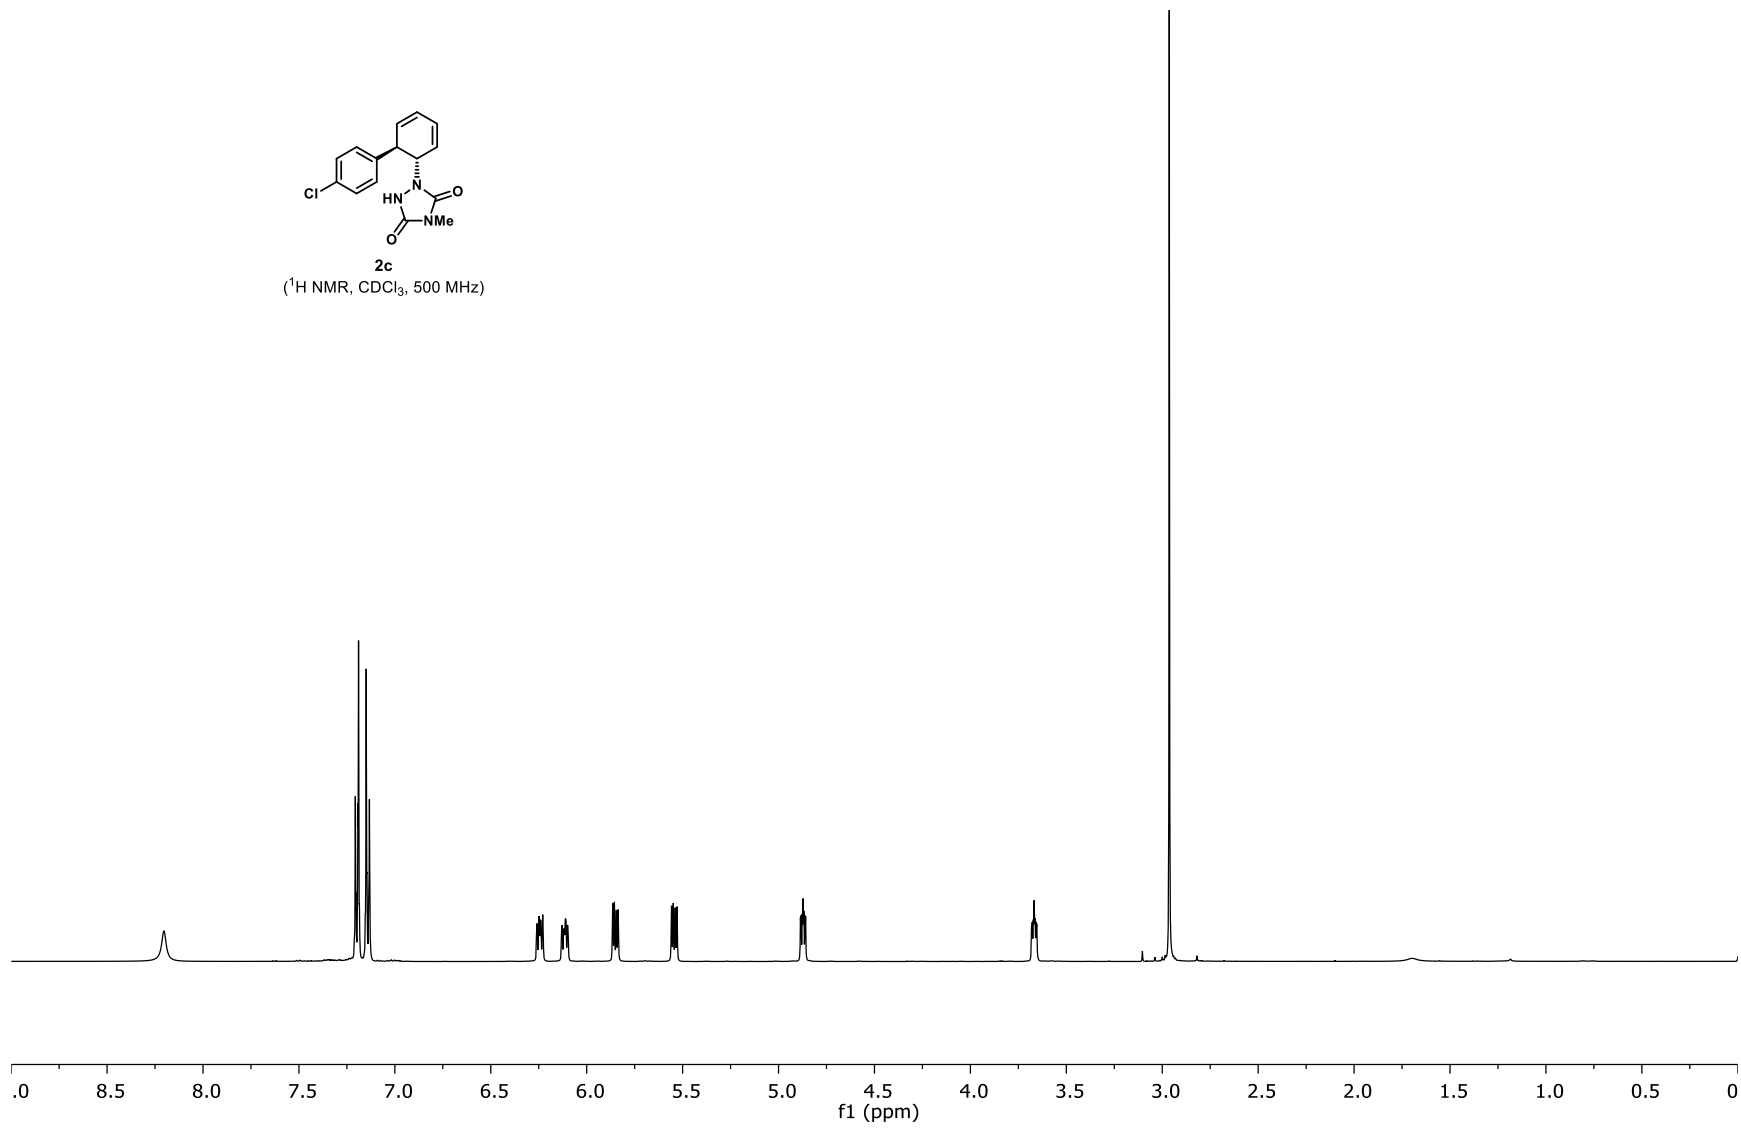

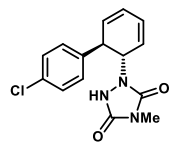

2c  
(<sup>13</sup>C NMR, CDCl<sub>3</sub>, 126 MHz)

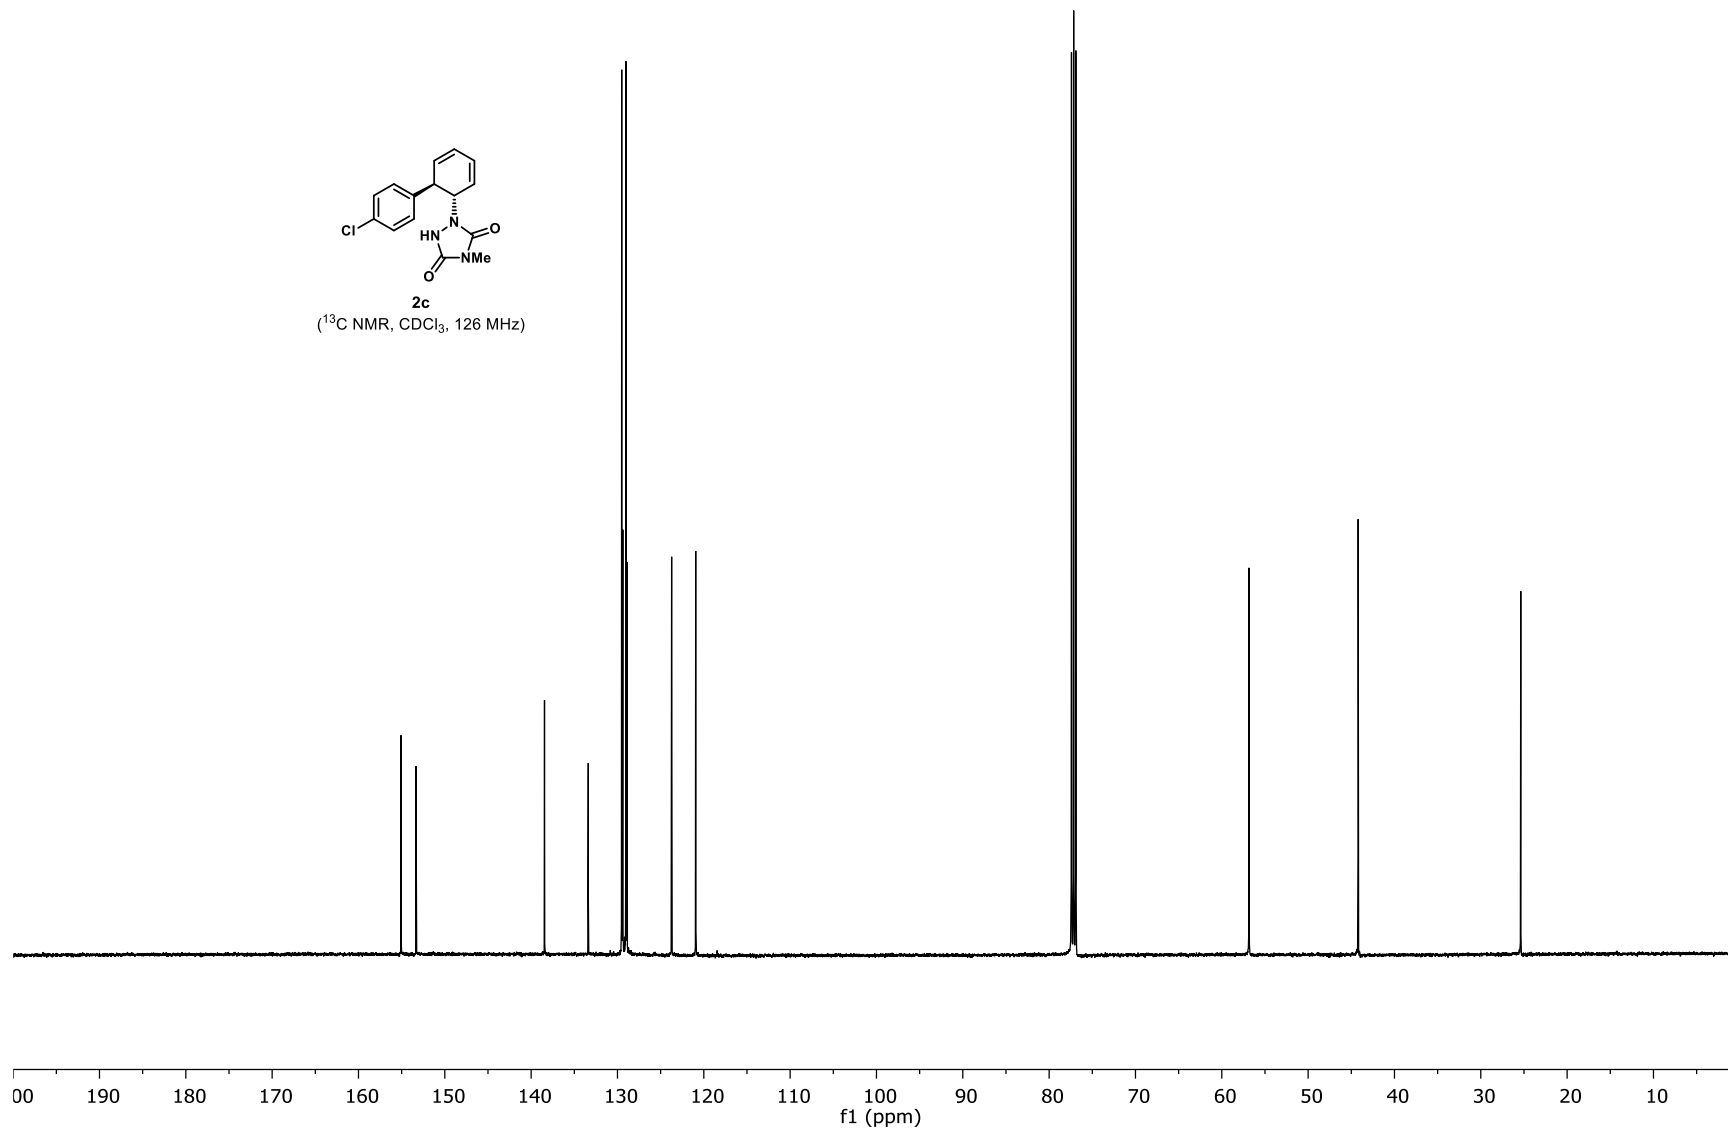

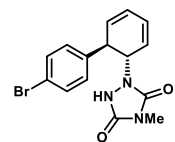

**2d**

(<sup>1</sup>H NMR, CDCl<sub>3</sub>, 500 MHz)

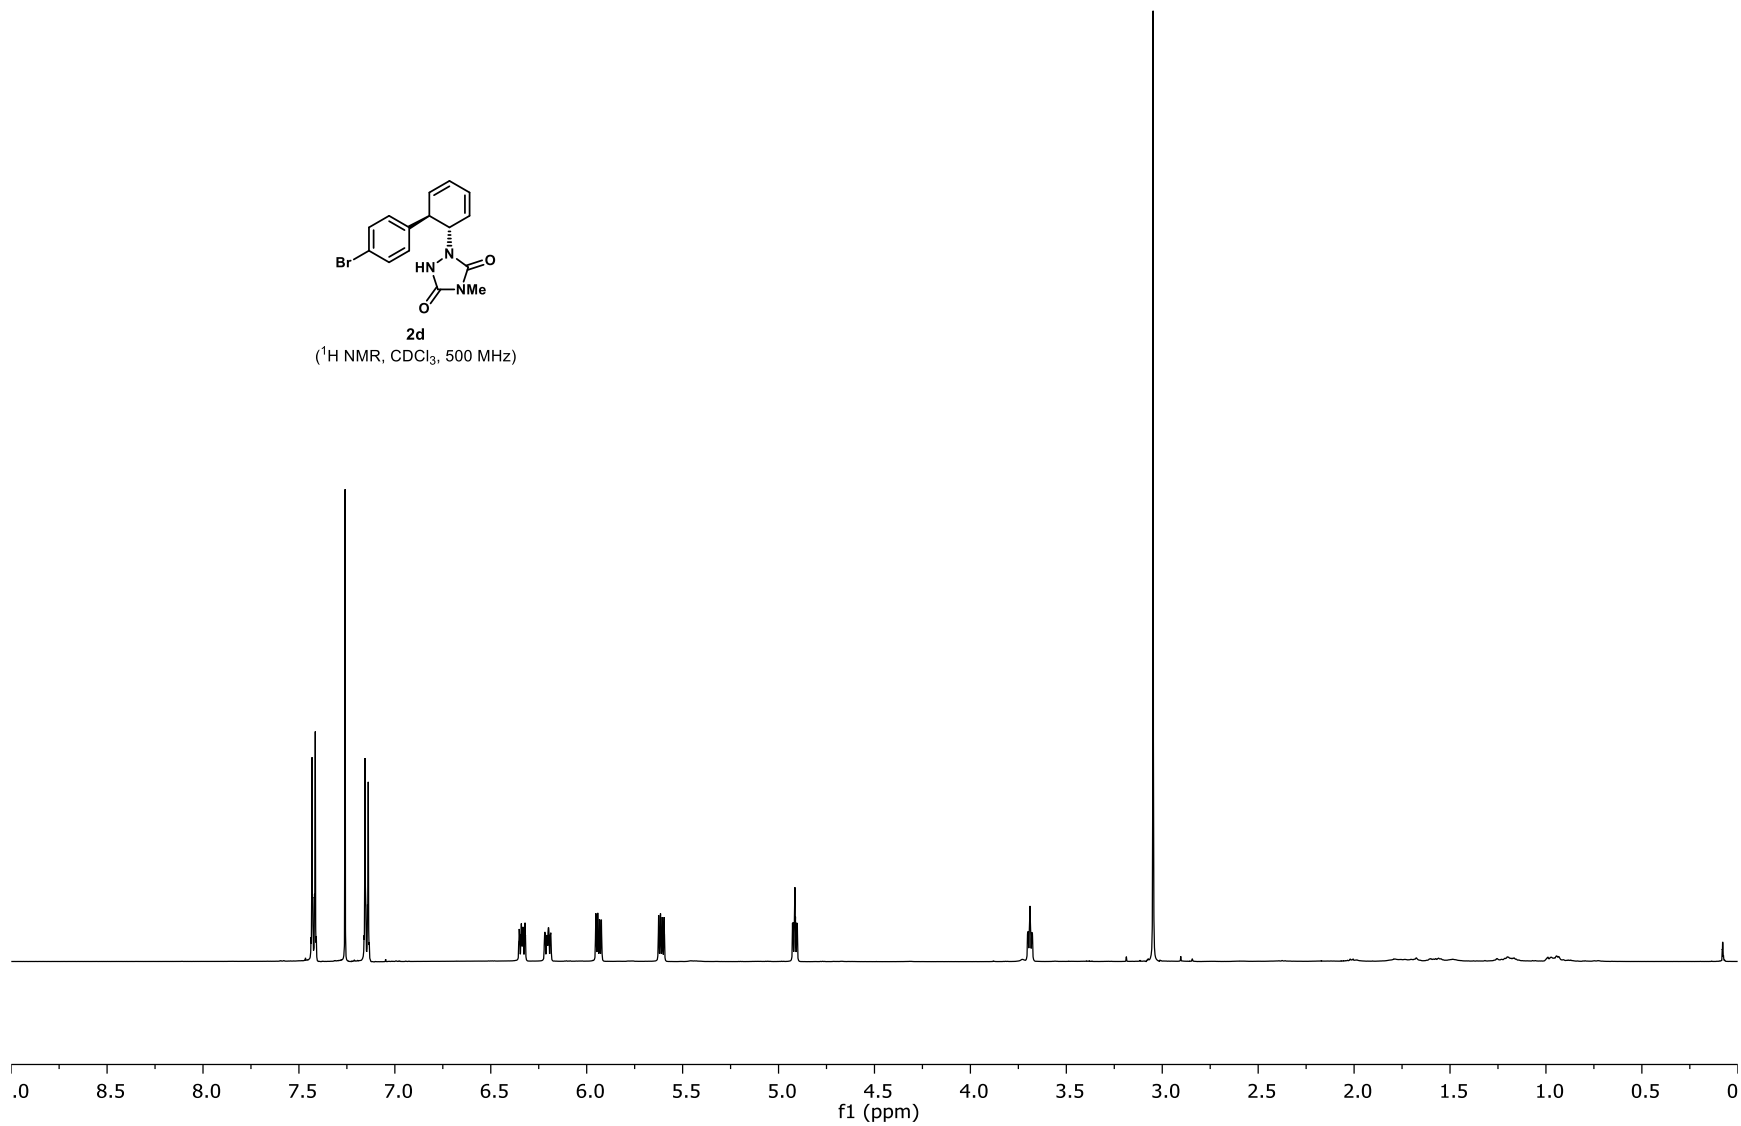

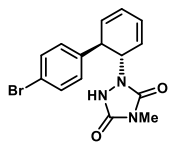

**2d**  
(<sup>13</sup>C NMR, CDCl<sub>3</sub>, 126 MHz)

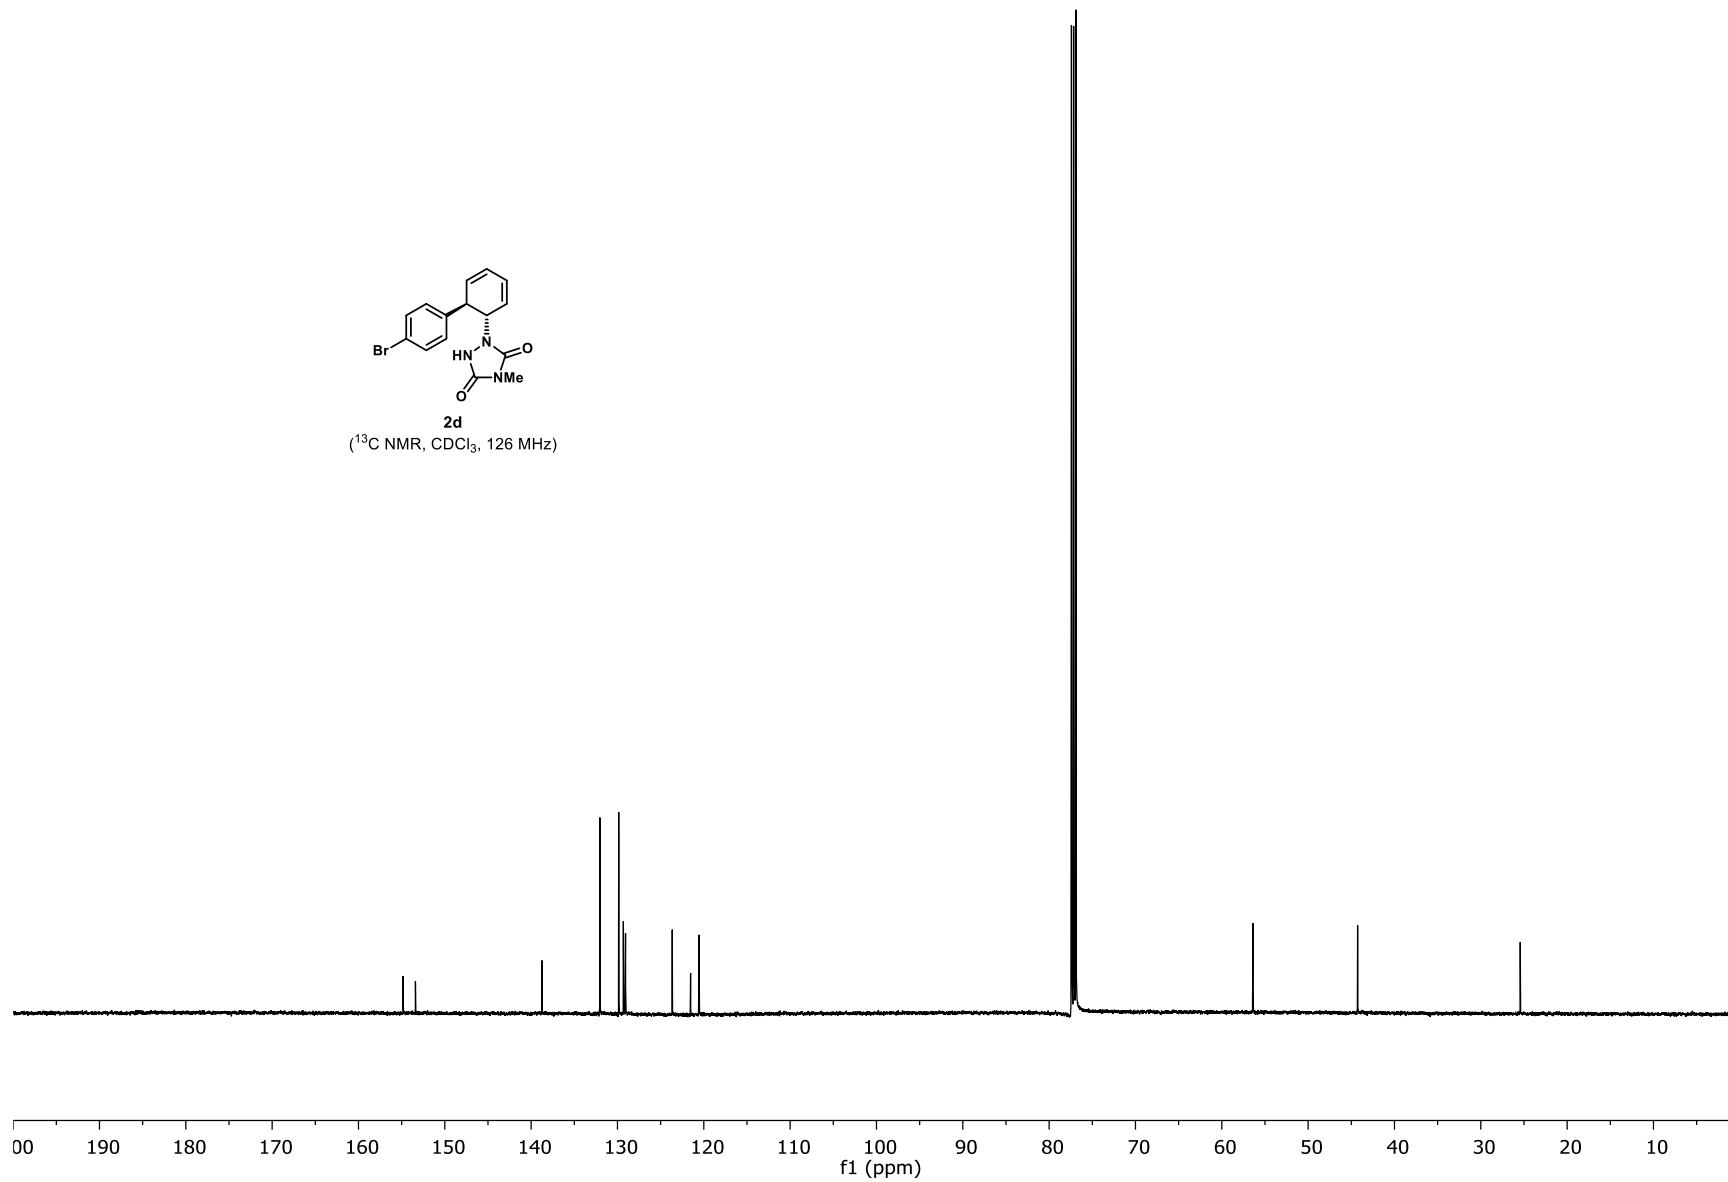

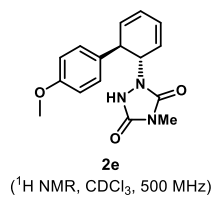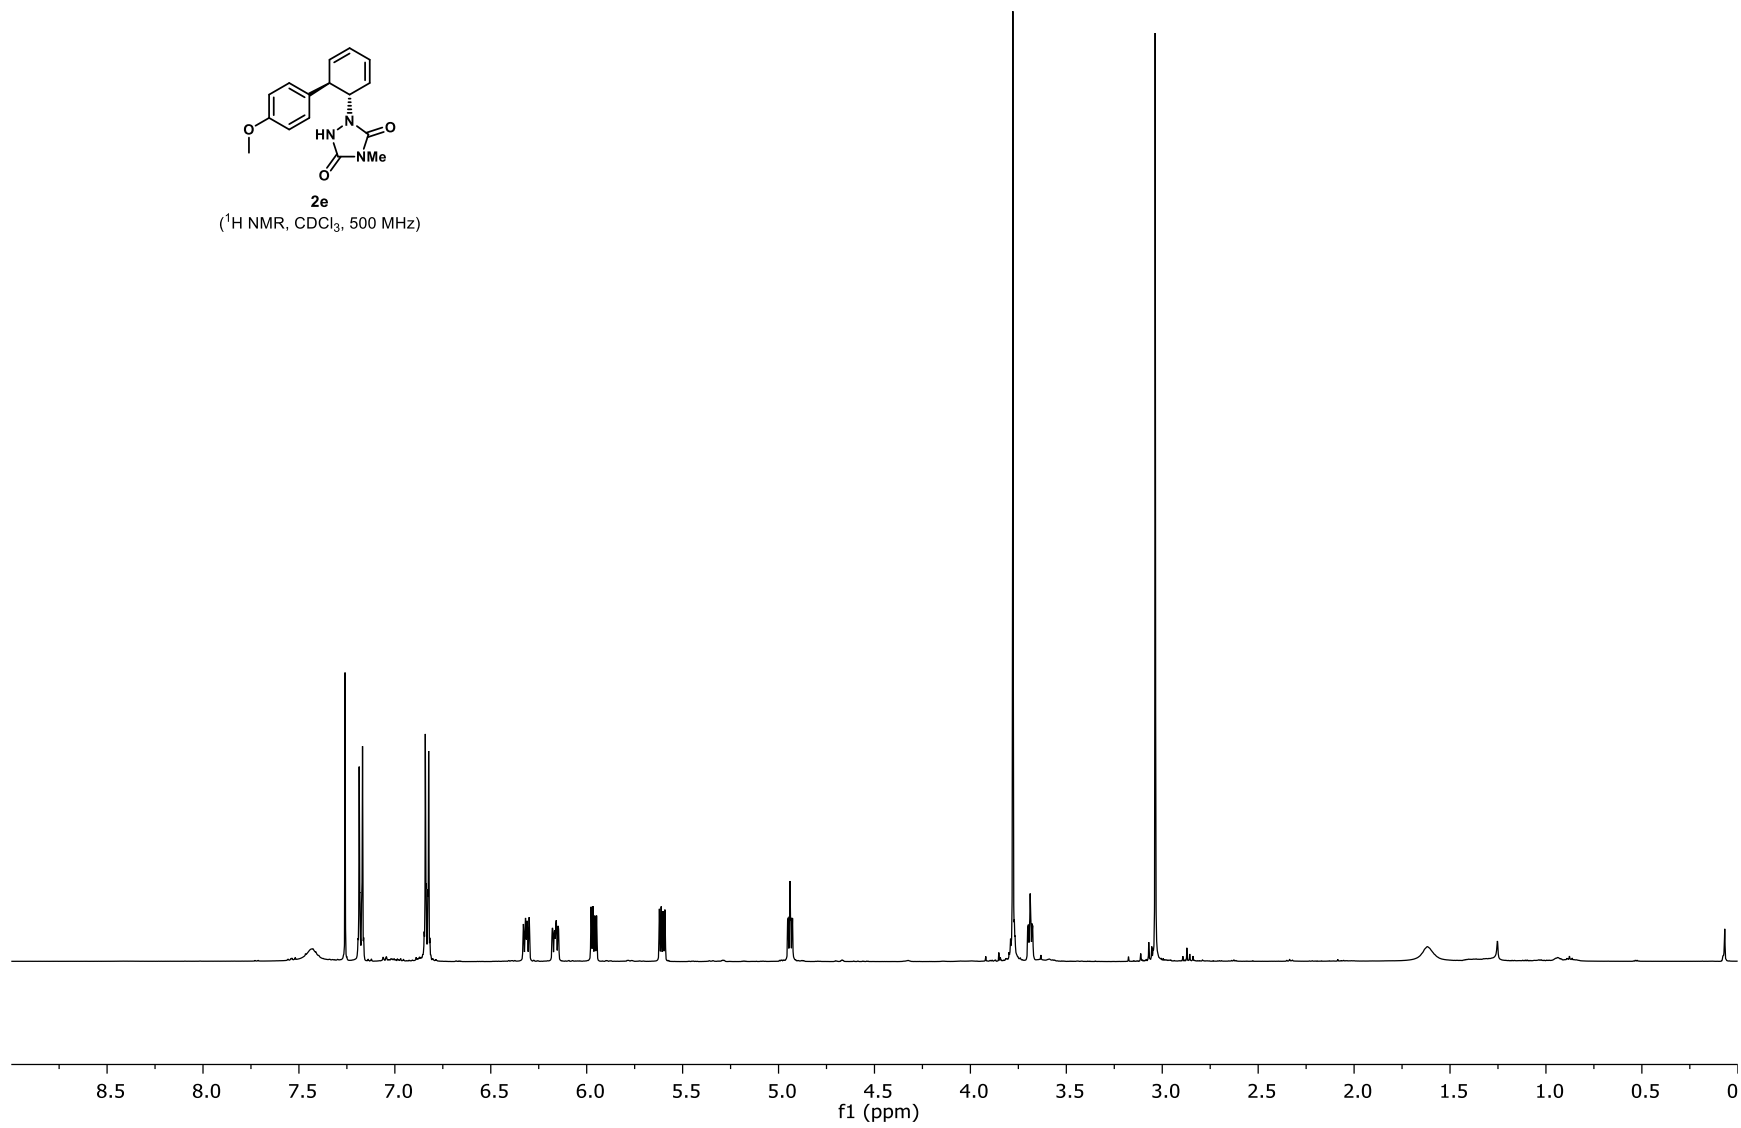



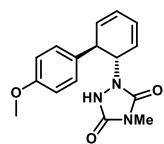

2e

(<sup>13</sup>C NMR, CDCl<sub>3</sub>, 126 MHz)

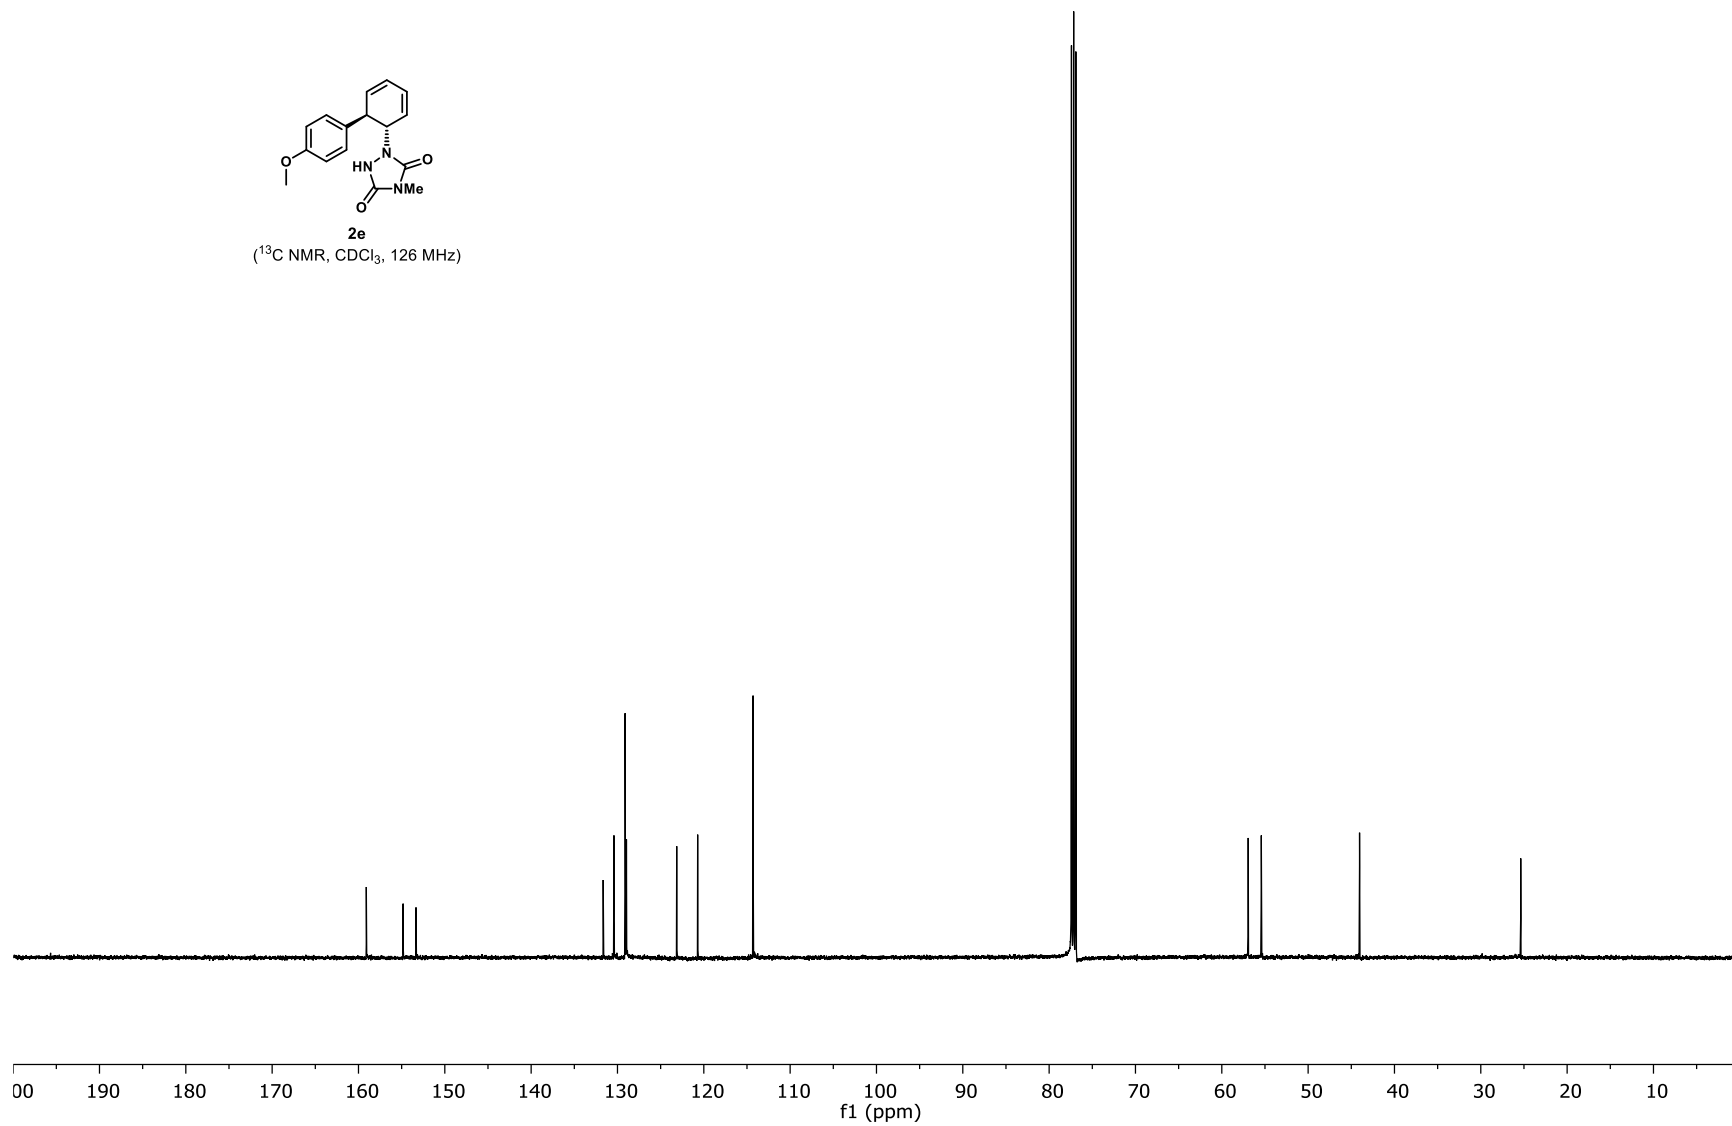

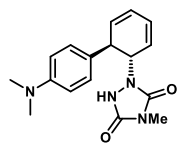

2f

(<sup>1</sup>H NMR, CDCl<sub>3</sub>, 500 MHz)

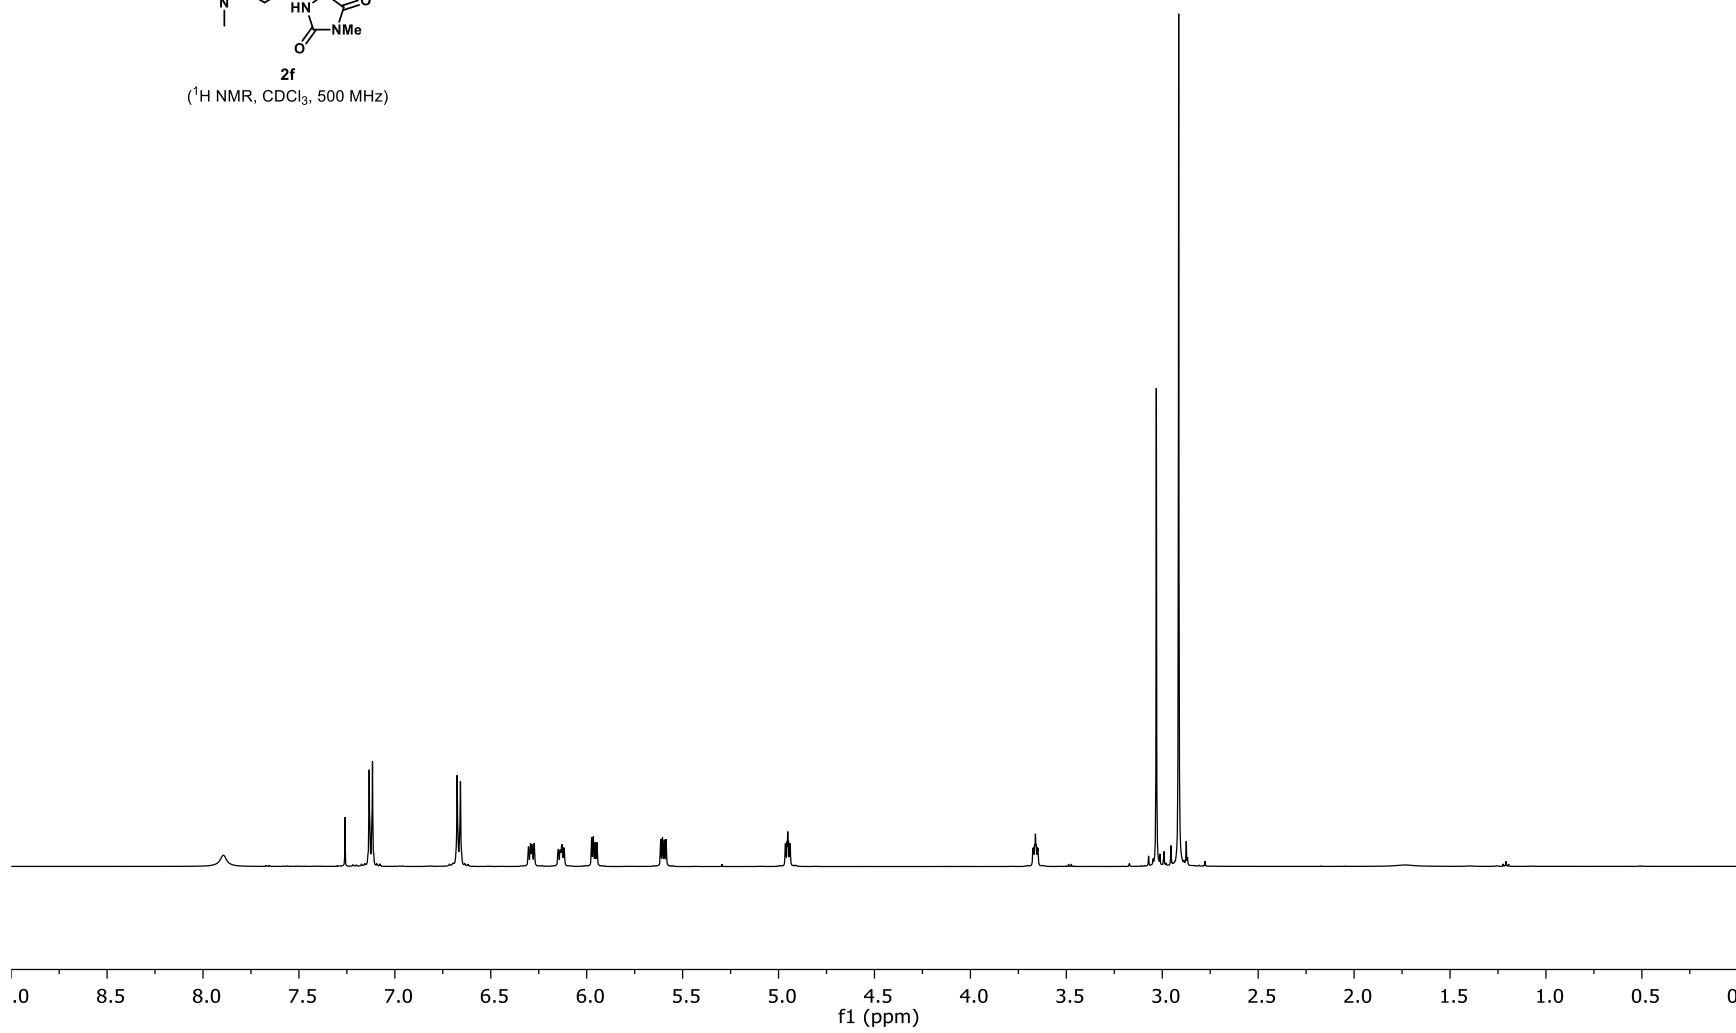

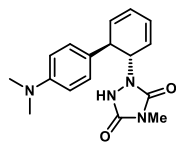

2f

(<sup>13</sup>C NMR, CDCl<sub>3</sub>, 126 MHz)

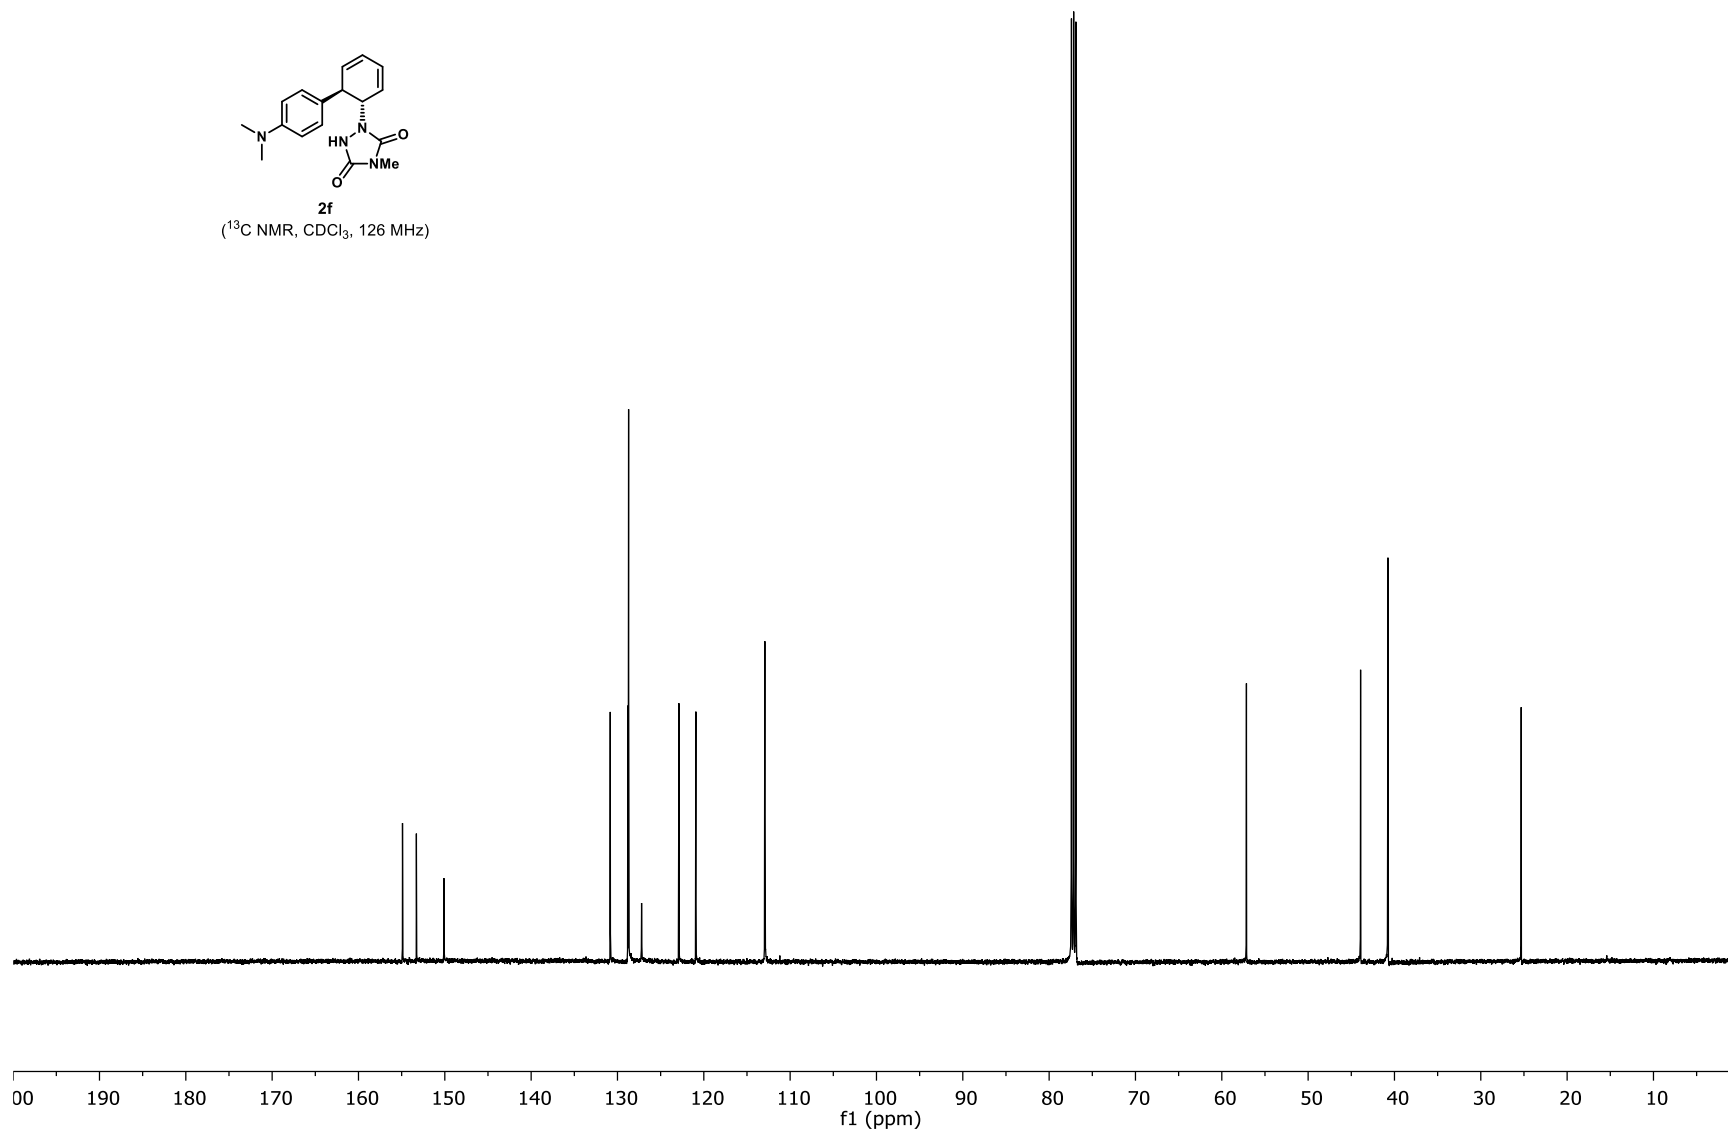

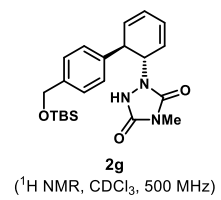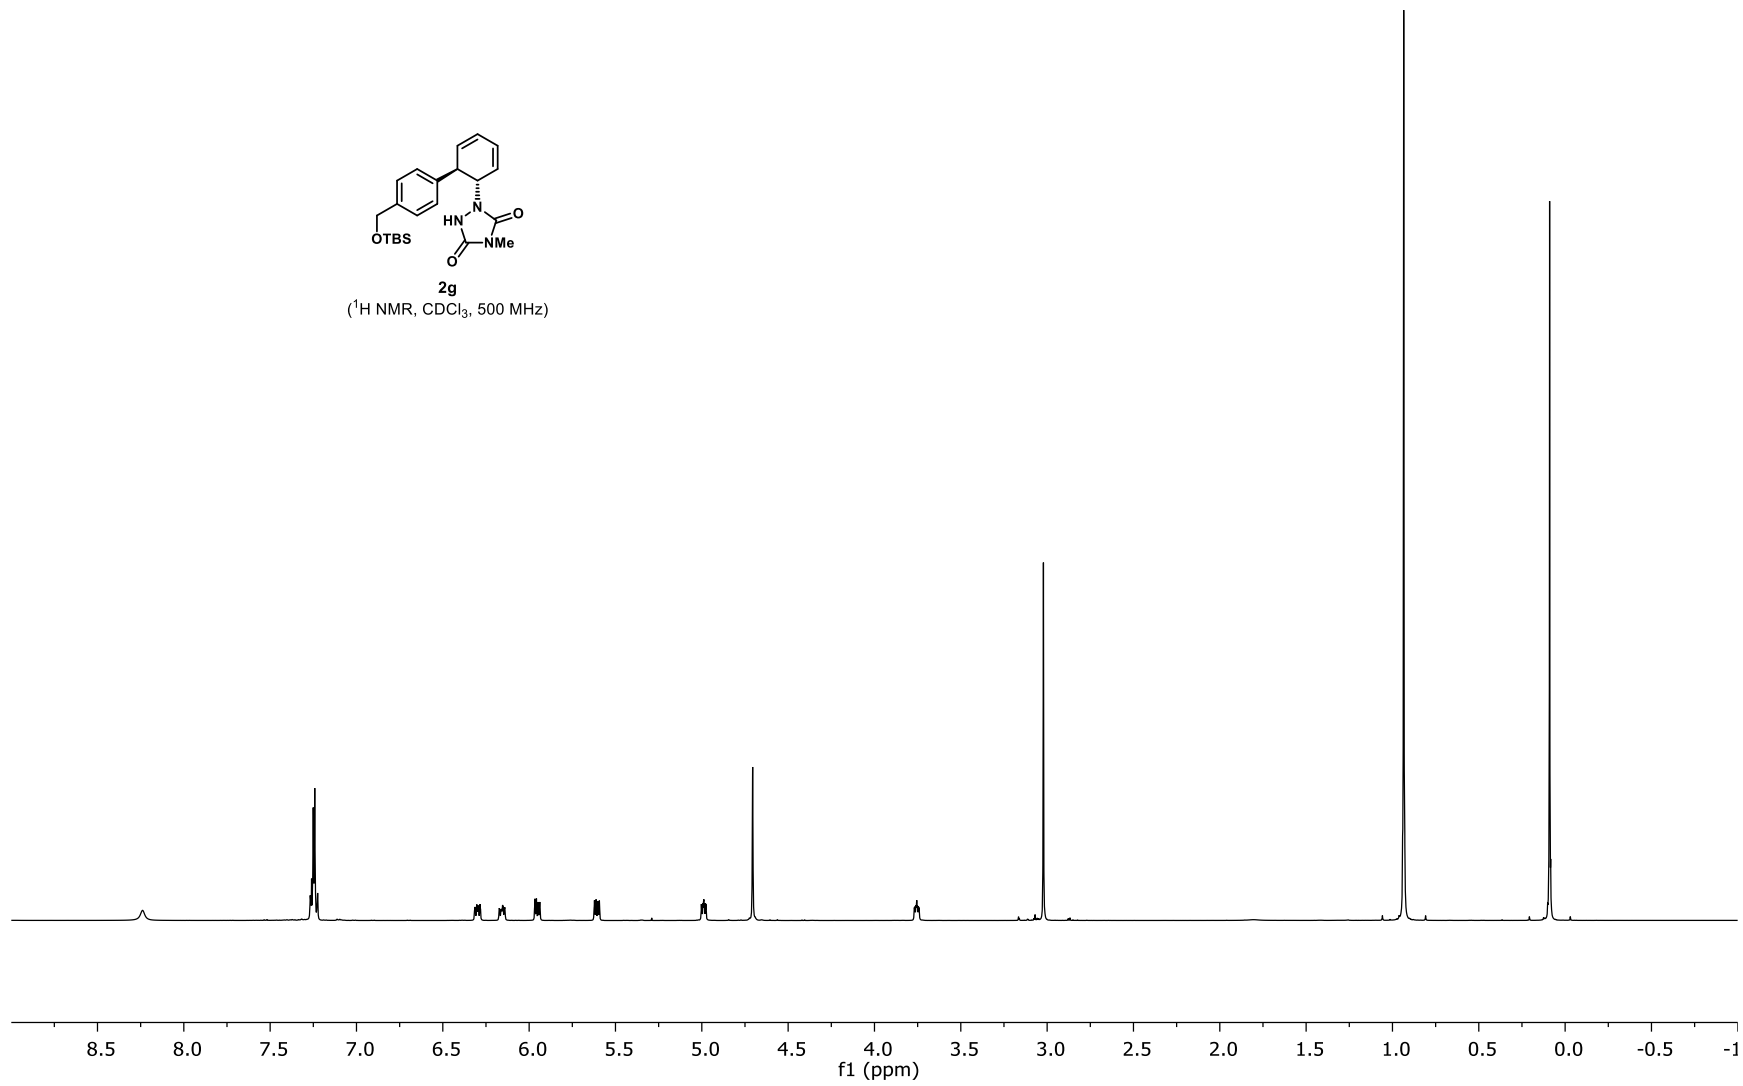

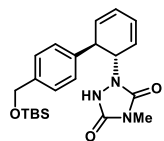

2g

(<sup>13</sup>C NMR, CDCl<sub>3</sub>, 126 MHz)

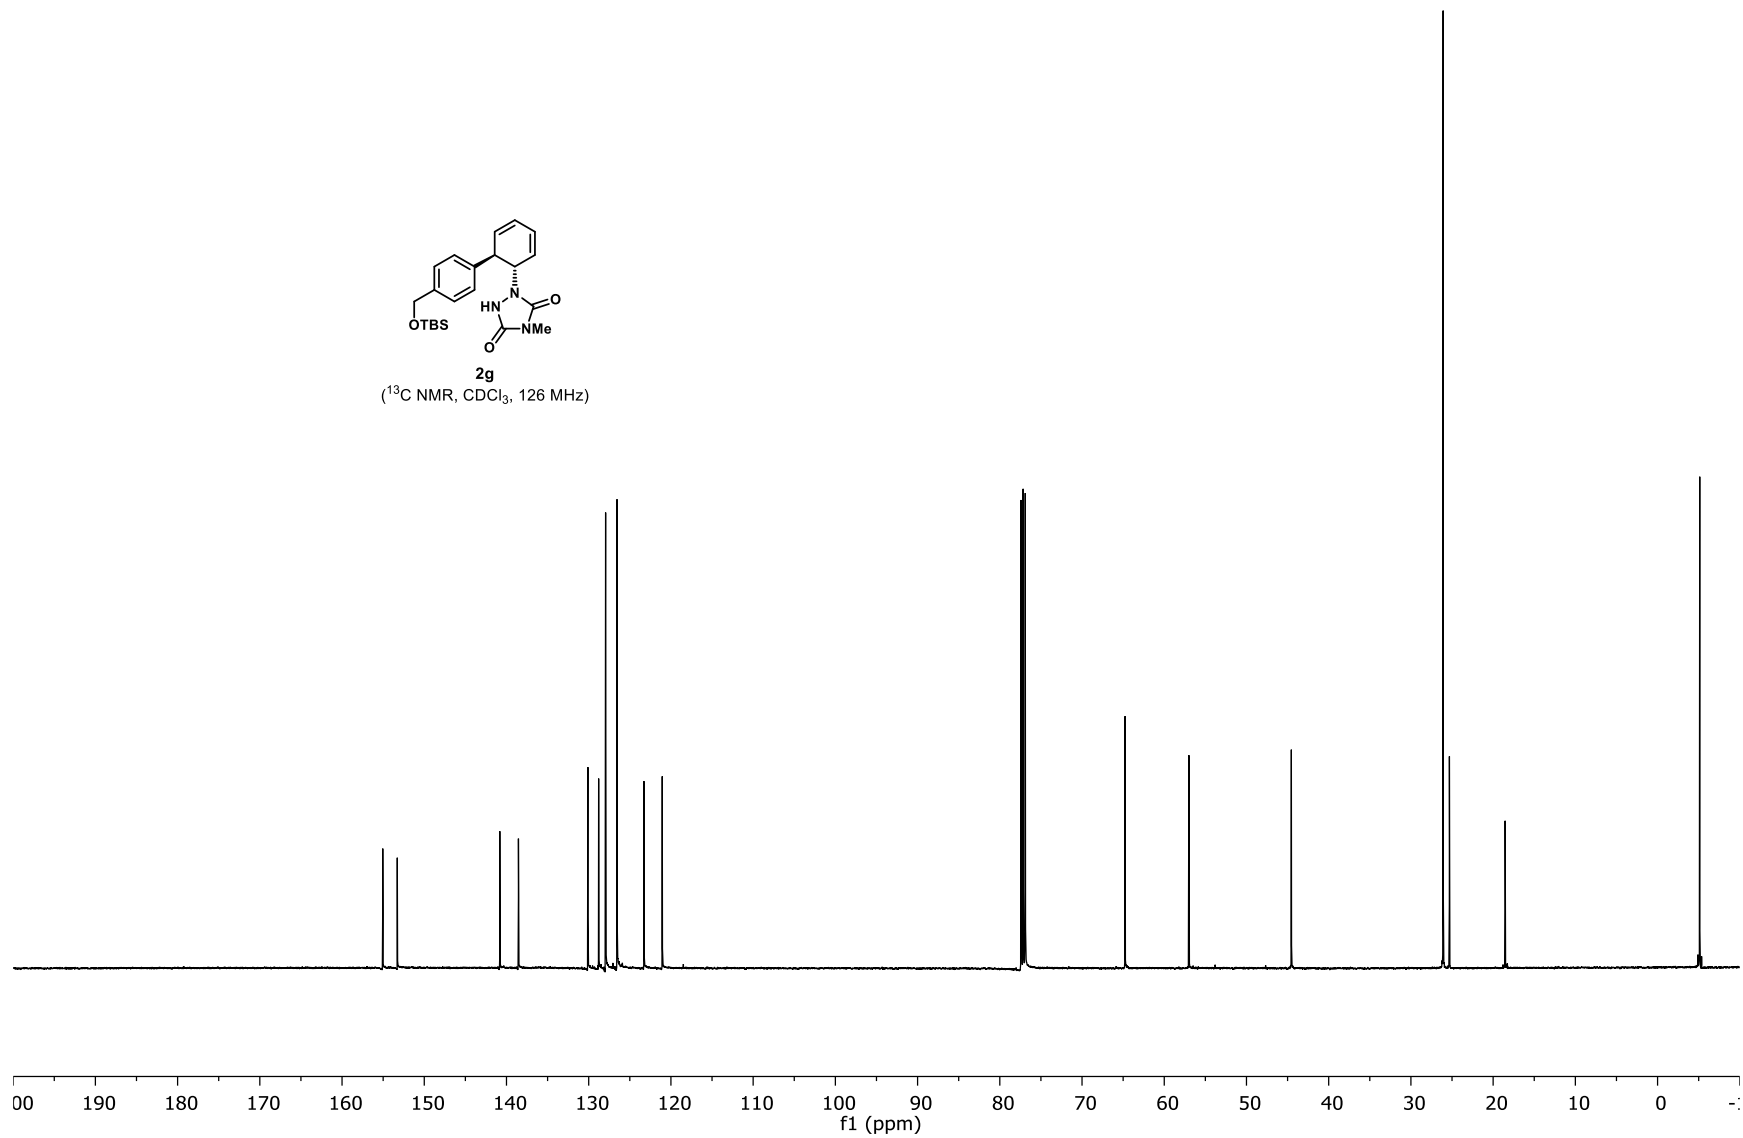

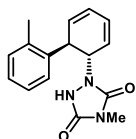

**2h**  
(<sup>1</sup>H NMR, CDCl<sub>3</sub>, 500 MHz)

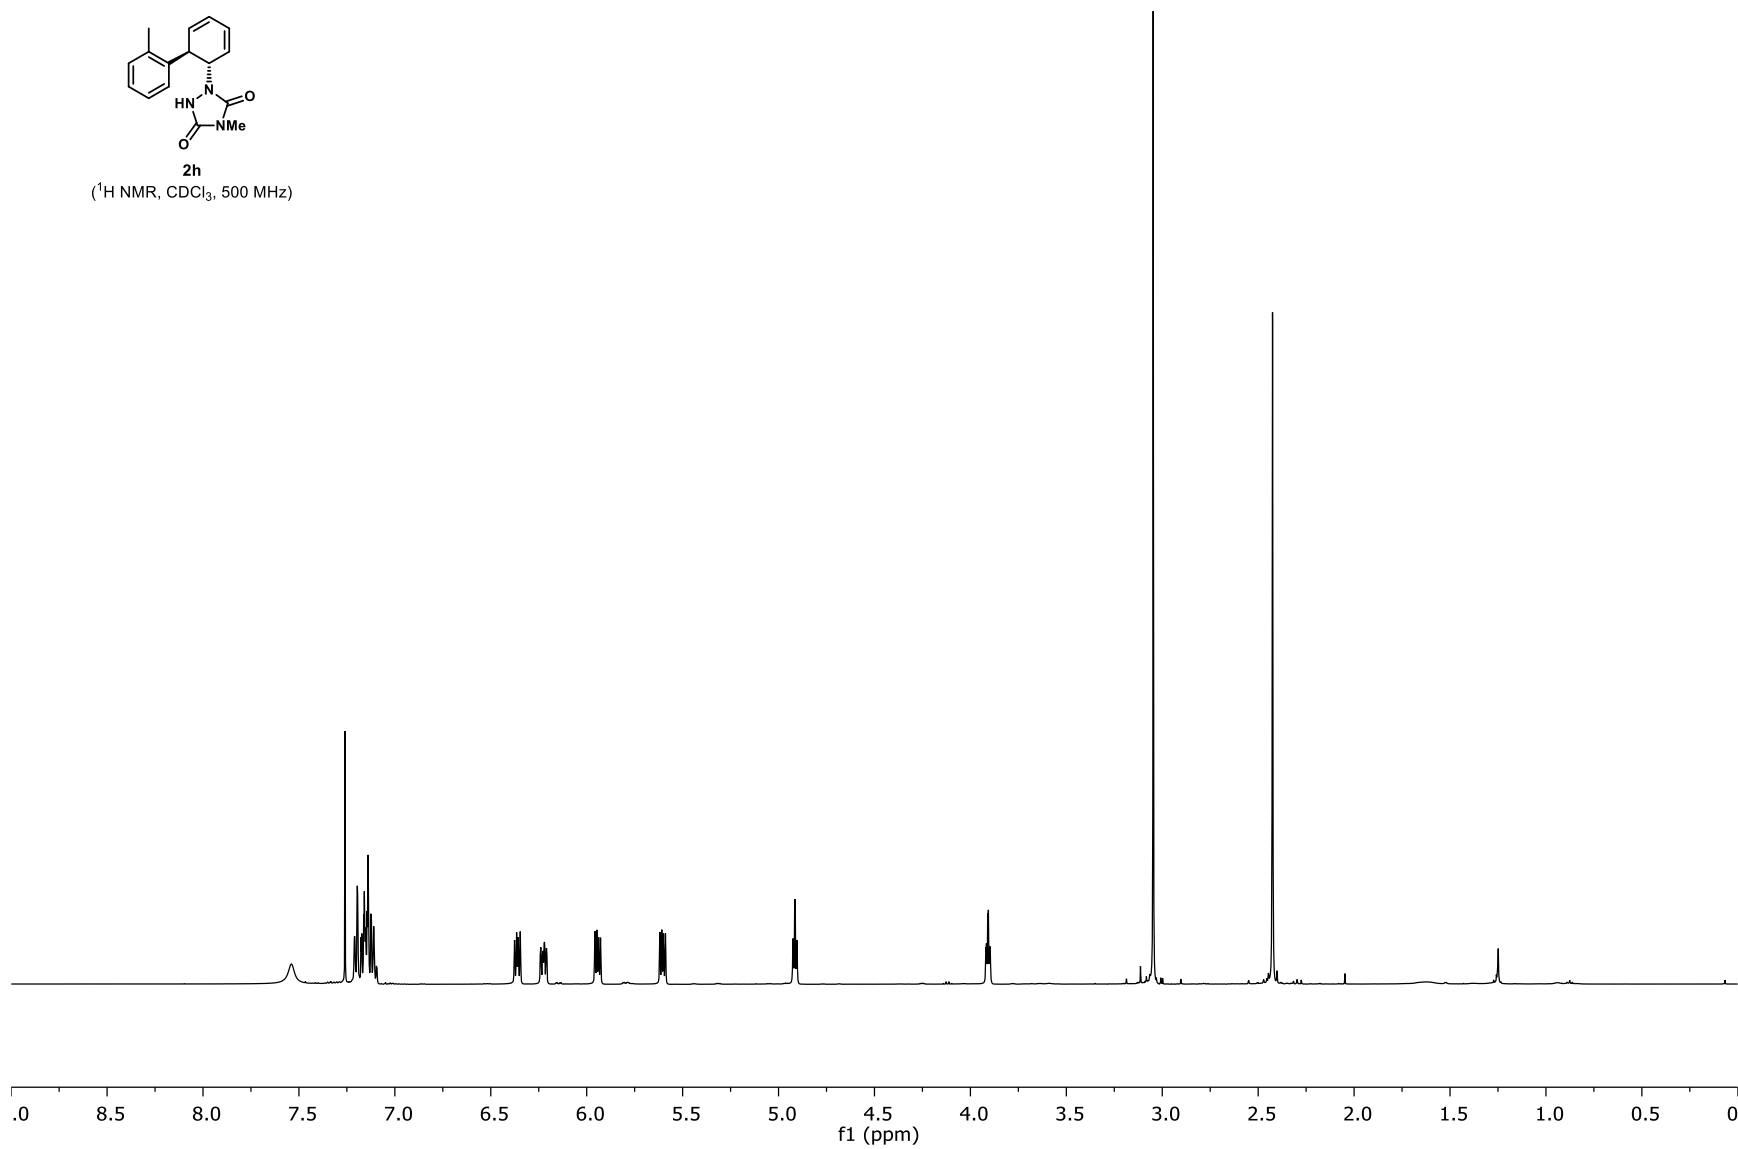

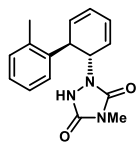

**2h**

(<sup>13</sup>C NMR, CDCl<sub>3</sub>, 126 MHz)

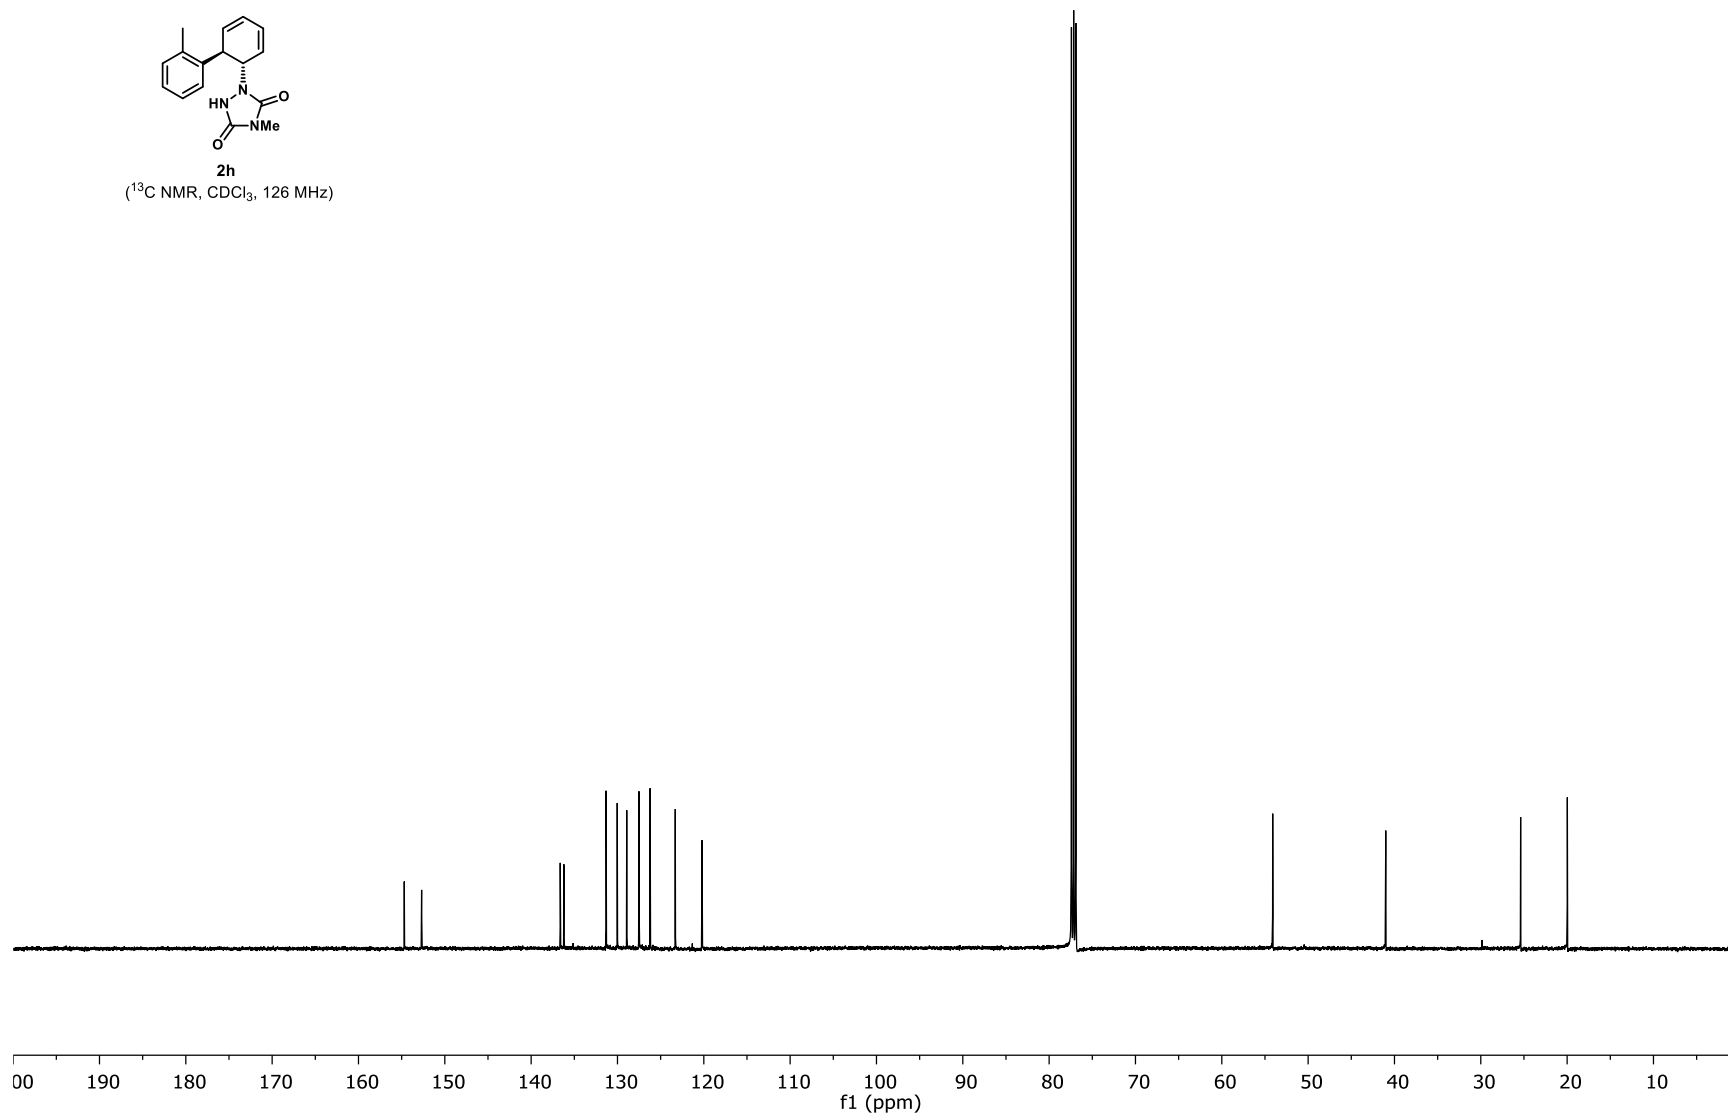

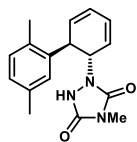

2i

(<sup>1</sup>H NMR, CDCl<sub>3</sub>, 500 MHz)

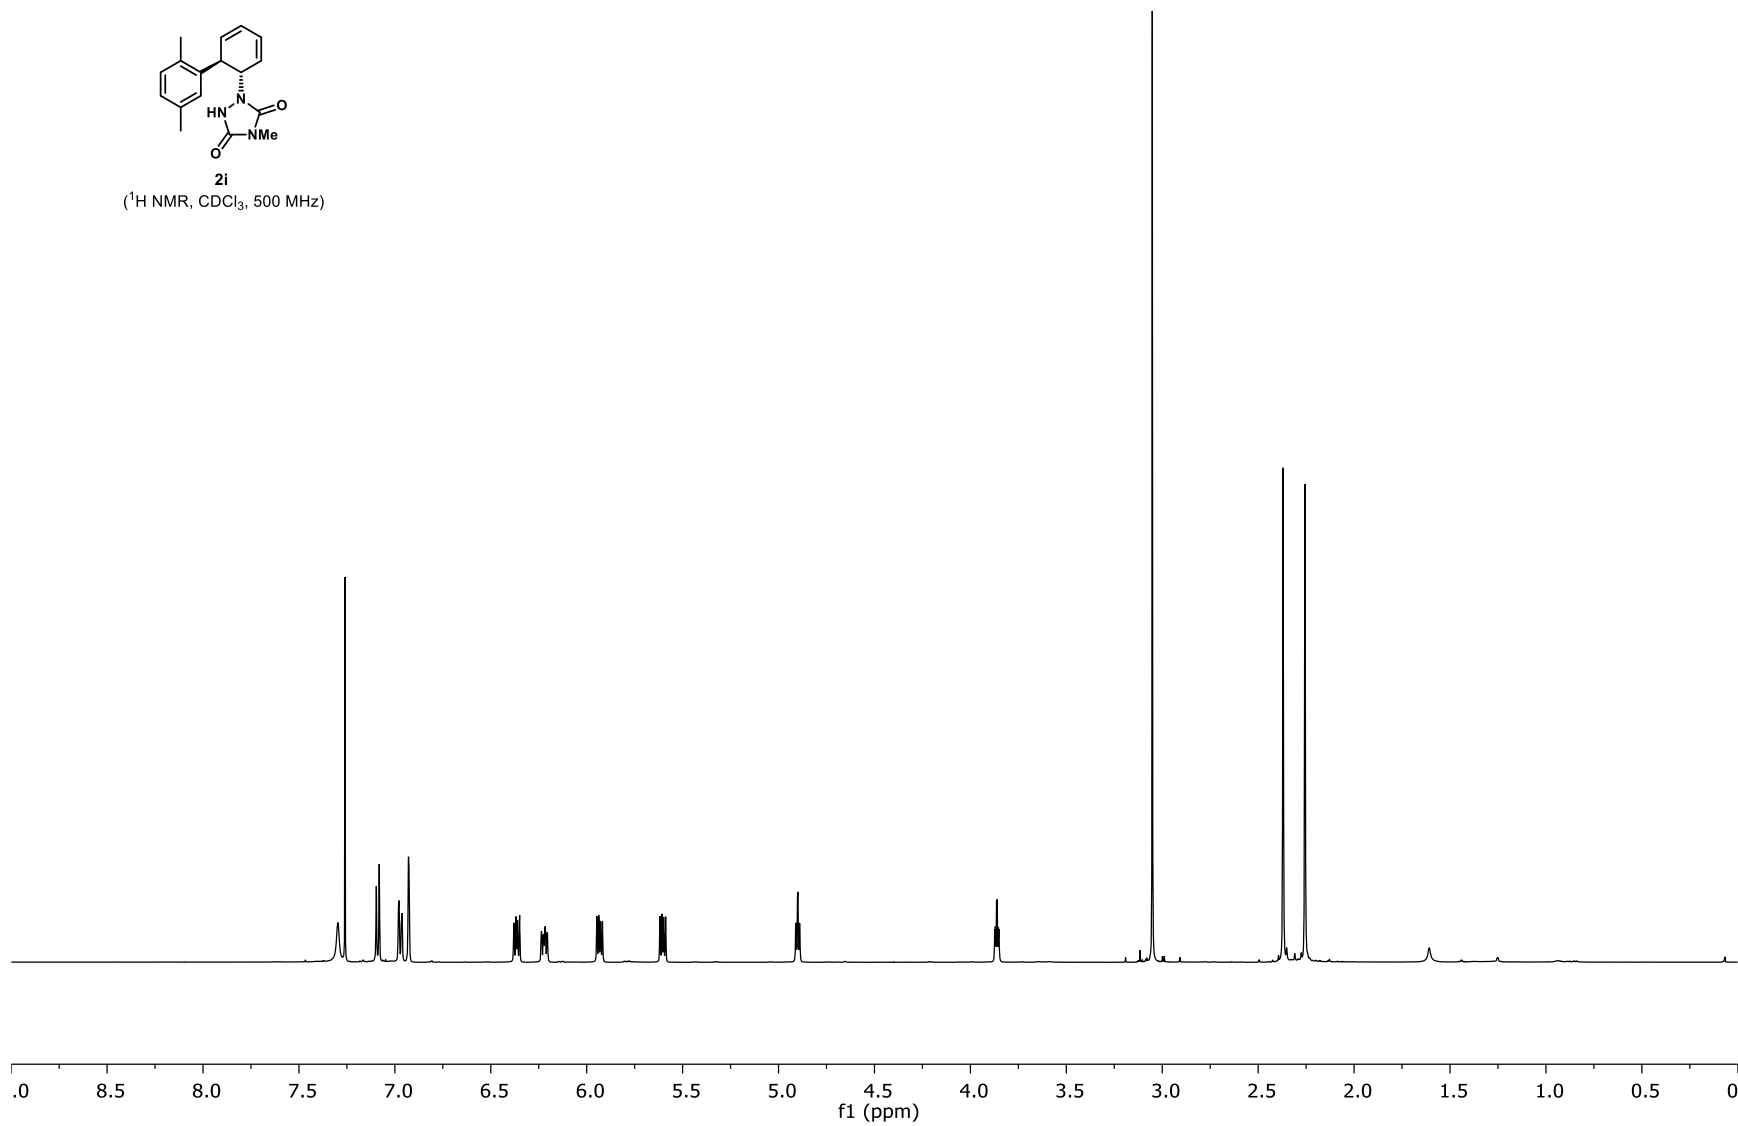



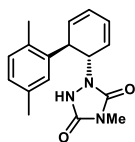

2i

(<sup>13</sup>C NMR, CDCl<sub>3</sub>, 126 MHz)

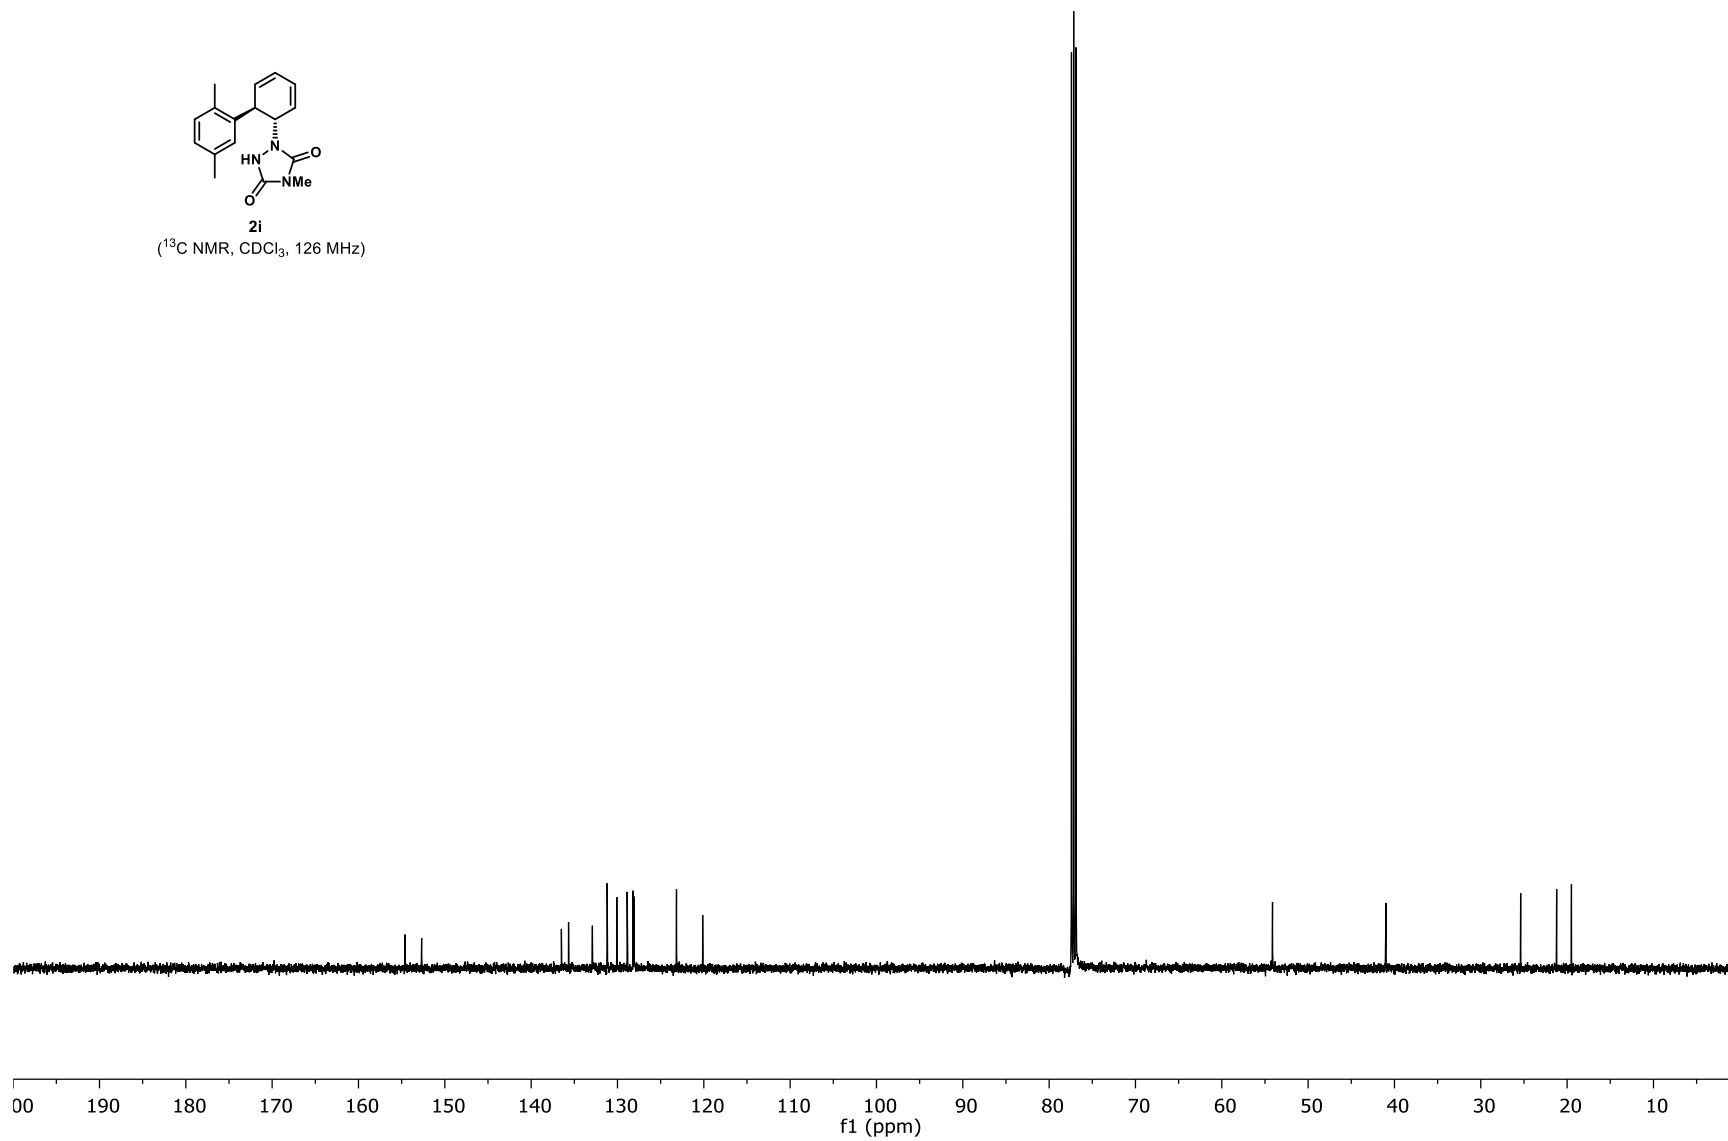

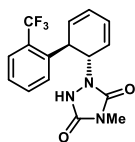

2j

(<sup>1</sup>H NMR, CDCl<sub>3</sub>, 500 MHz)

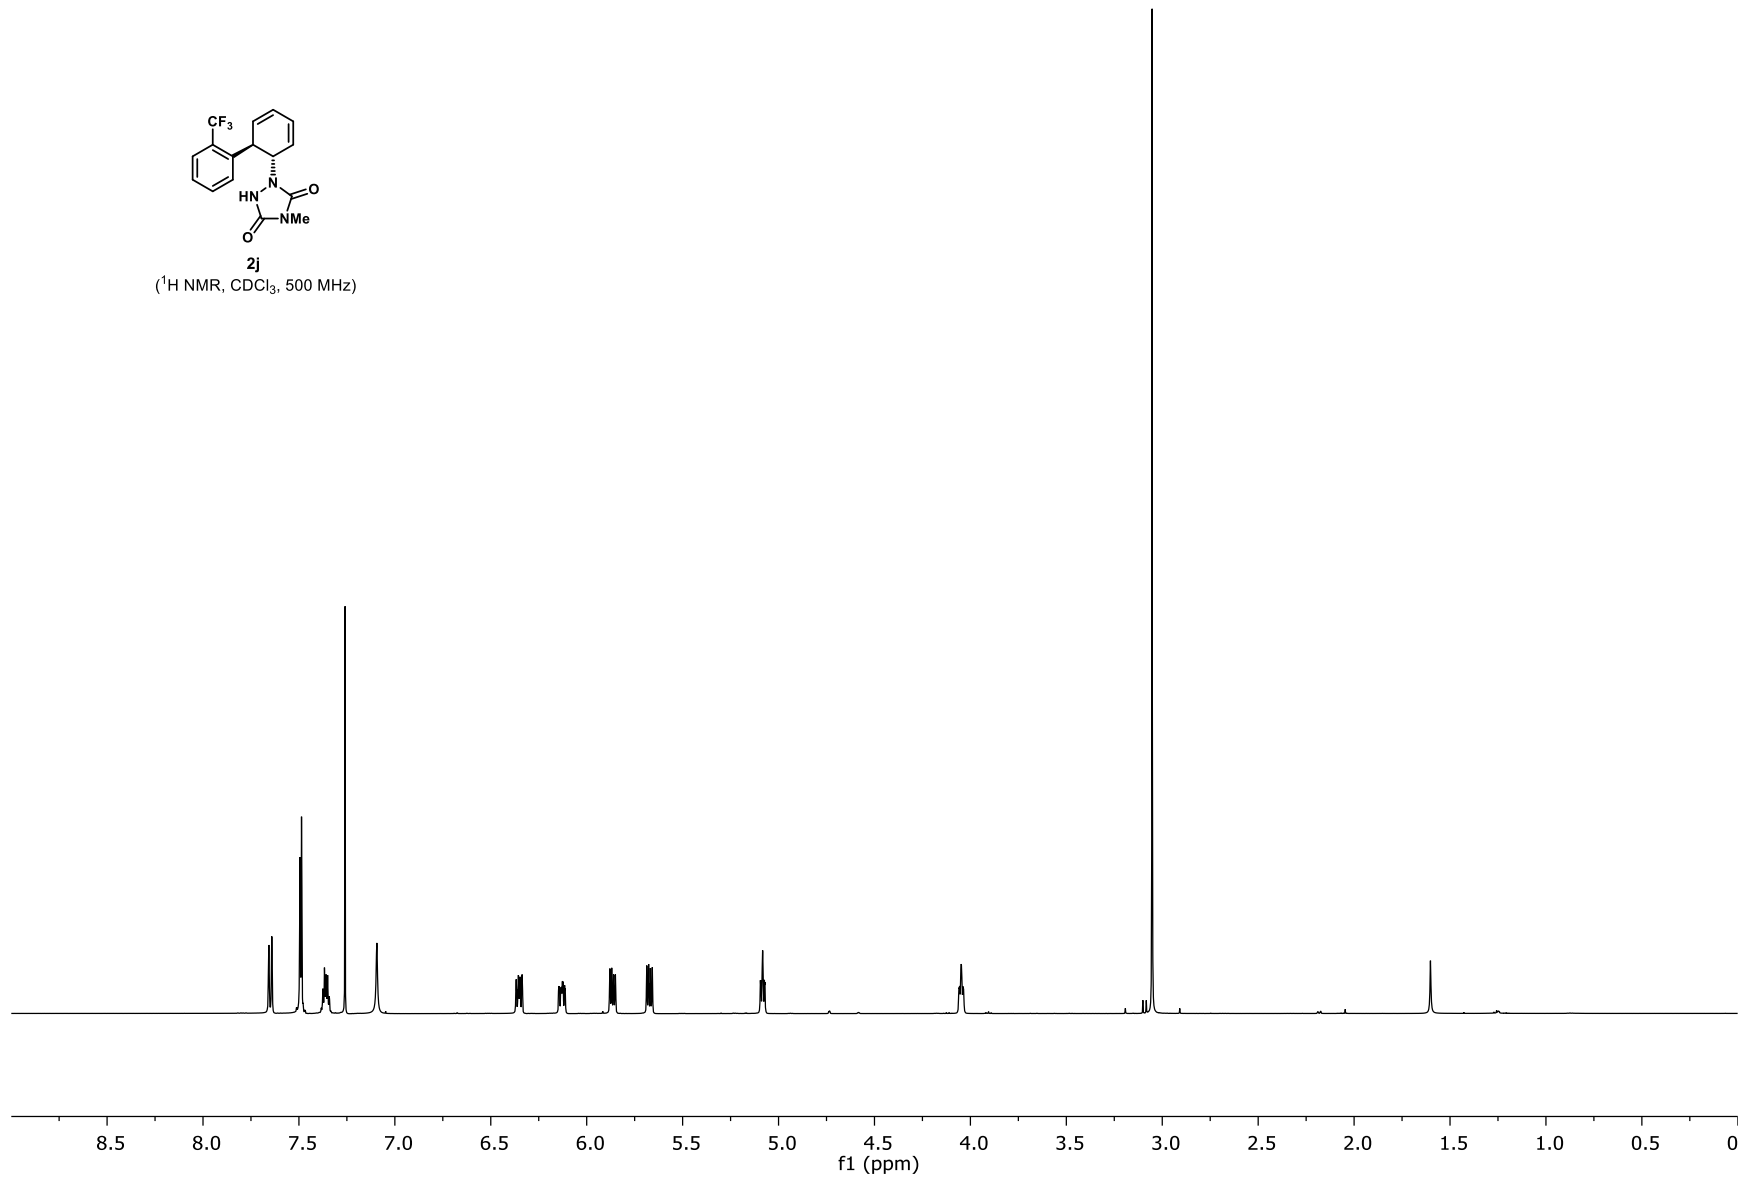

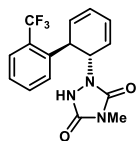

2j

(<sup>13</sup>C NMR, CDCl<sub>3</sub>, 126 MHz)

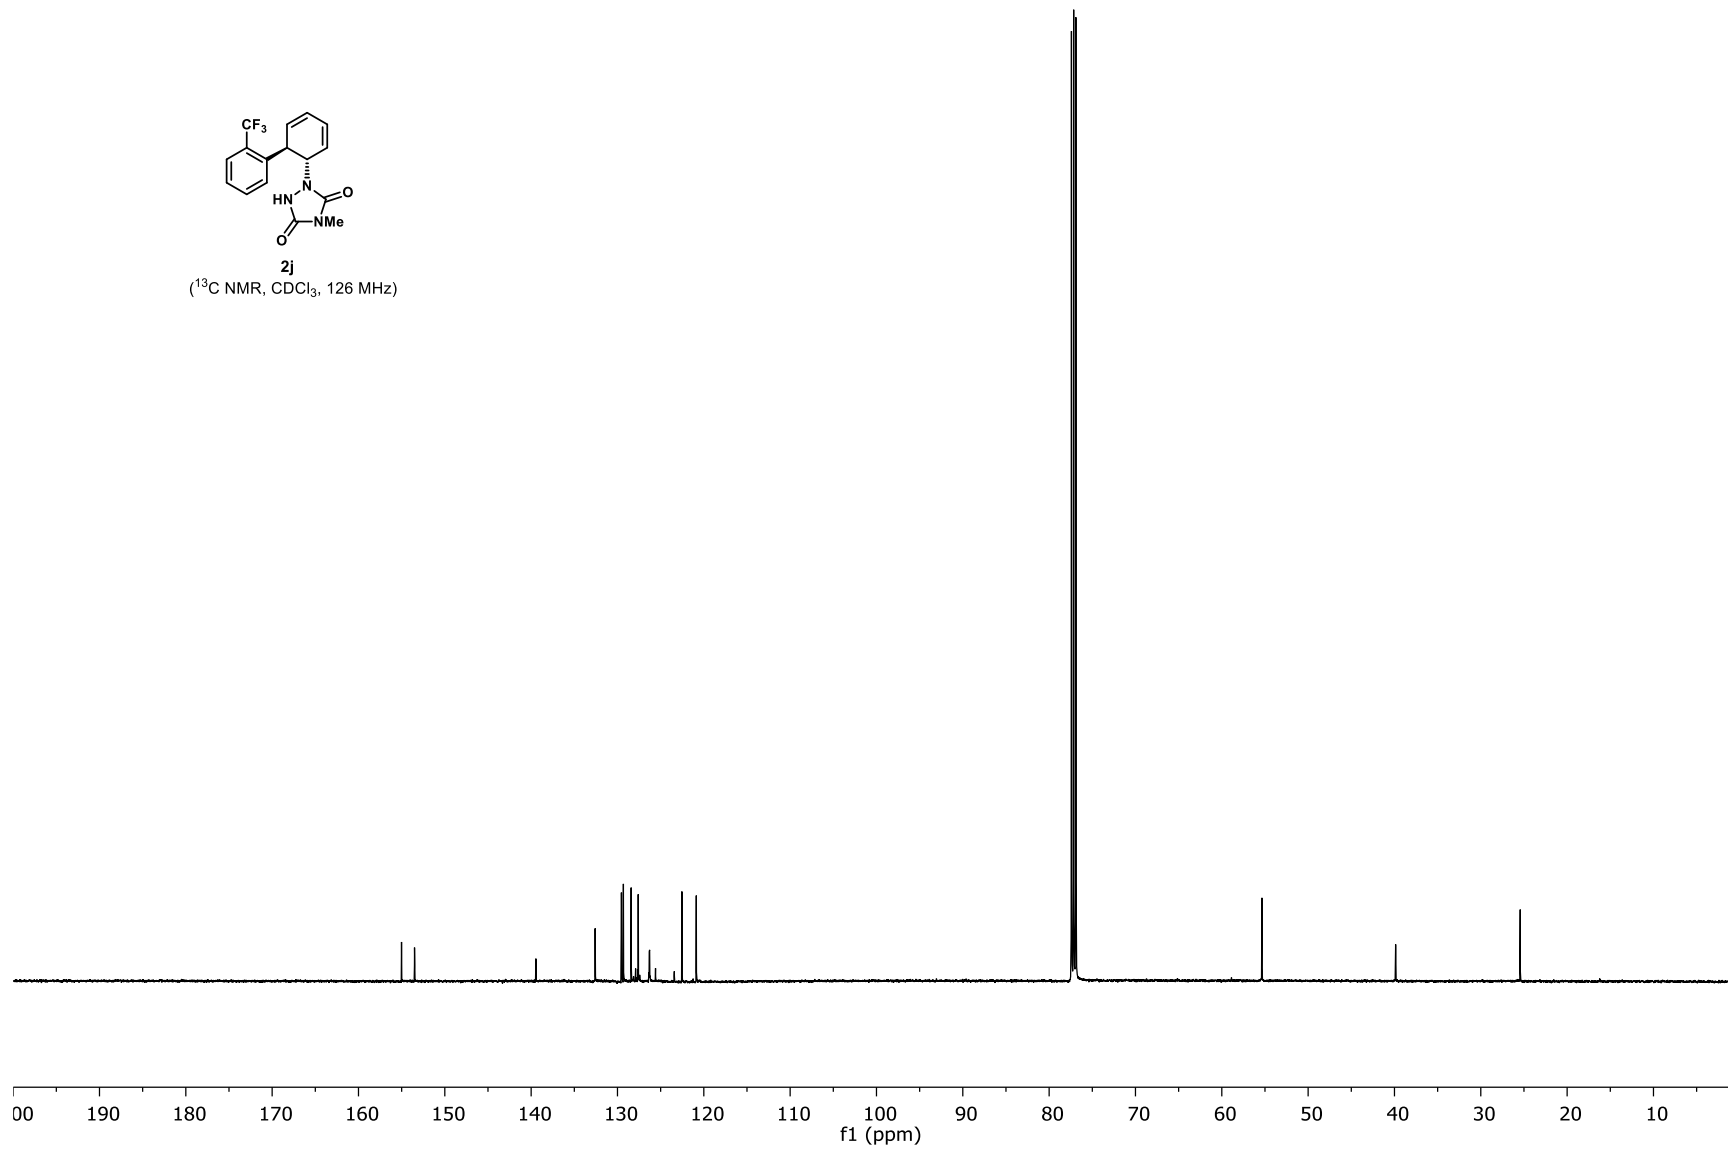

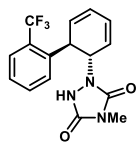

2j

(<sup>19</sup>F NMR, CDCl<sub>3</sub>, 471 MHz)

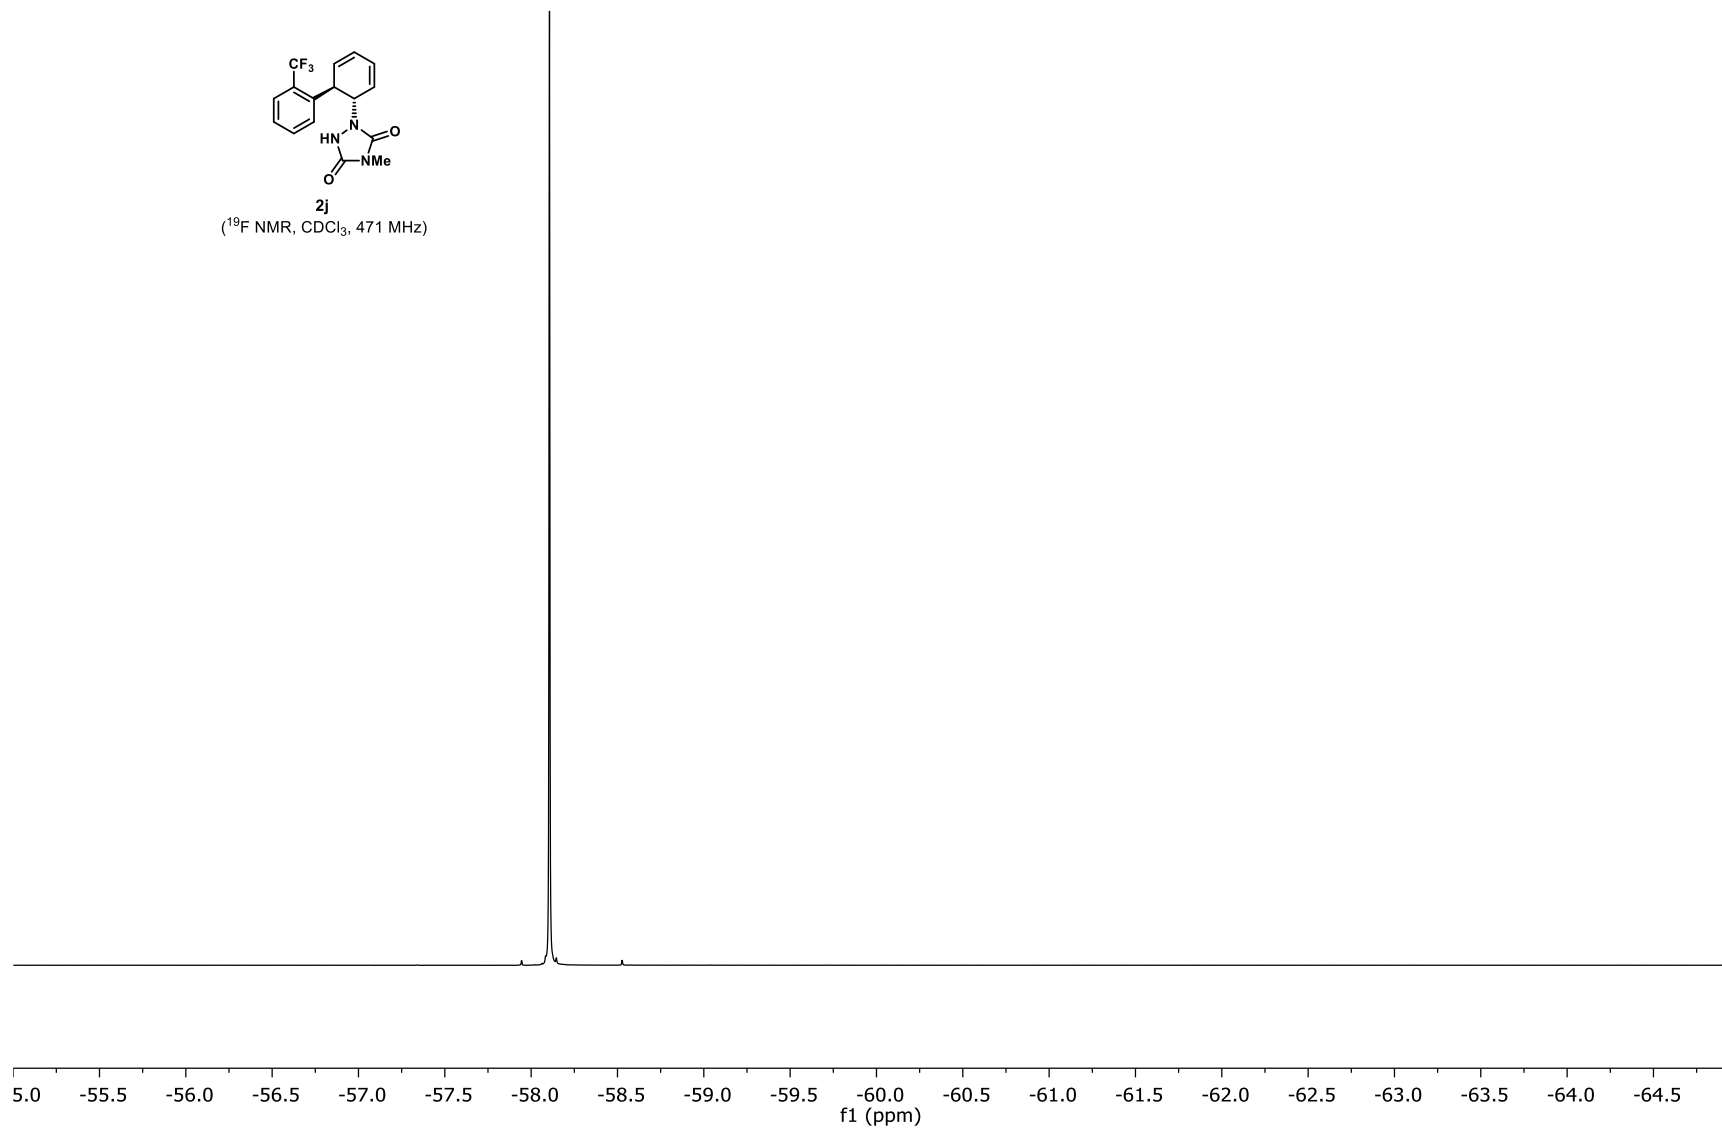

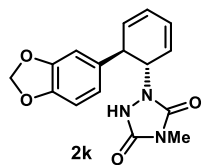

(<sup>1</sup>H NMR, CDCl<sub>3</sub>, 500 MHz)

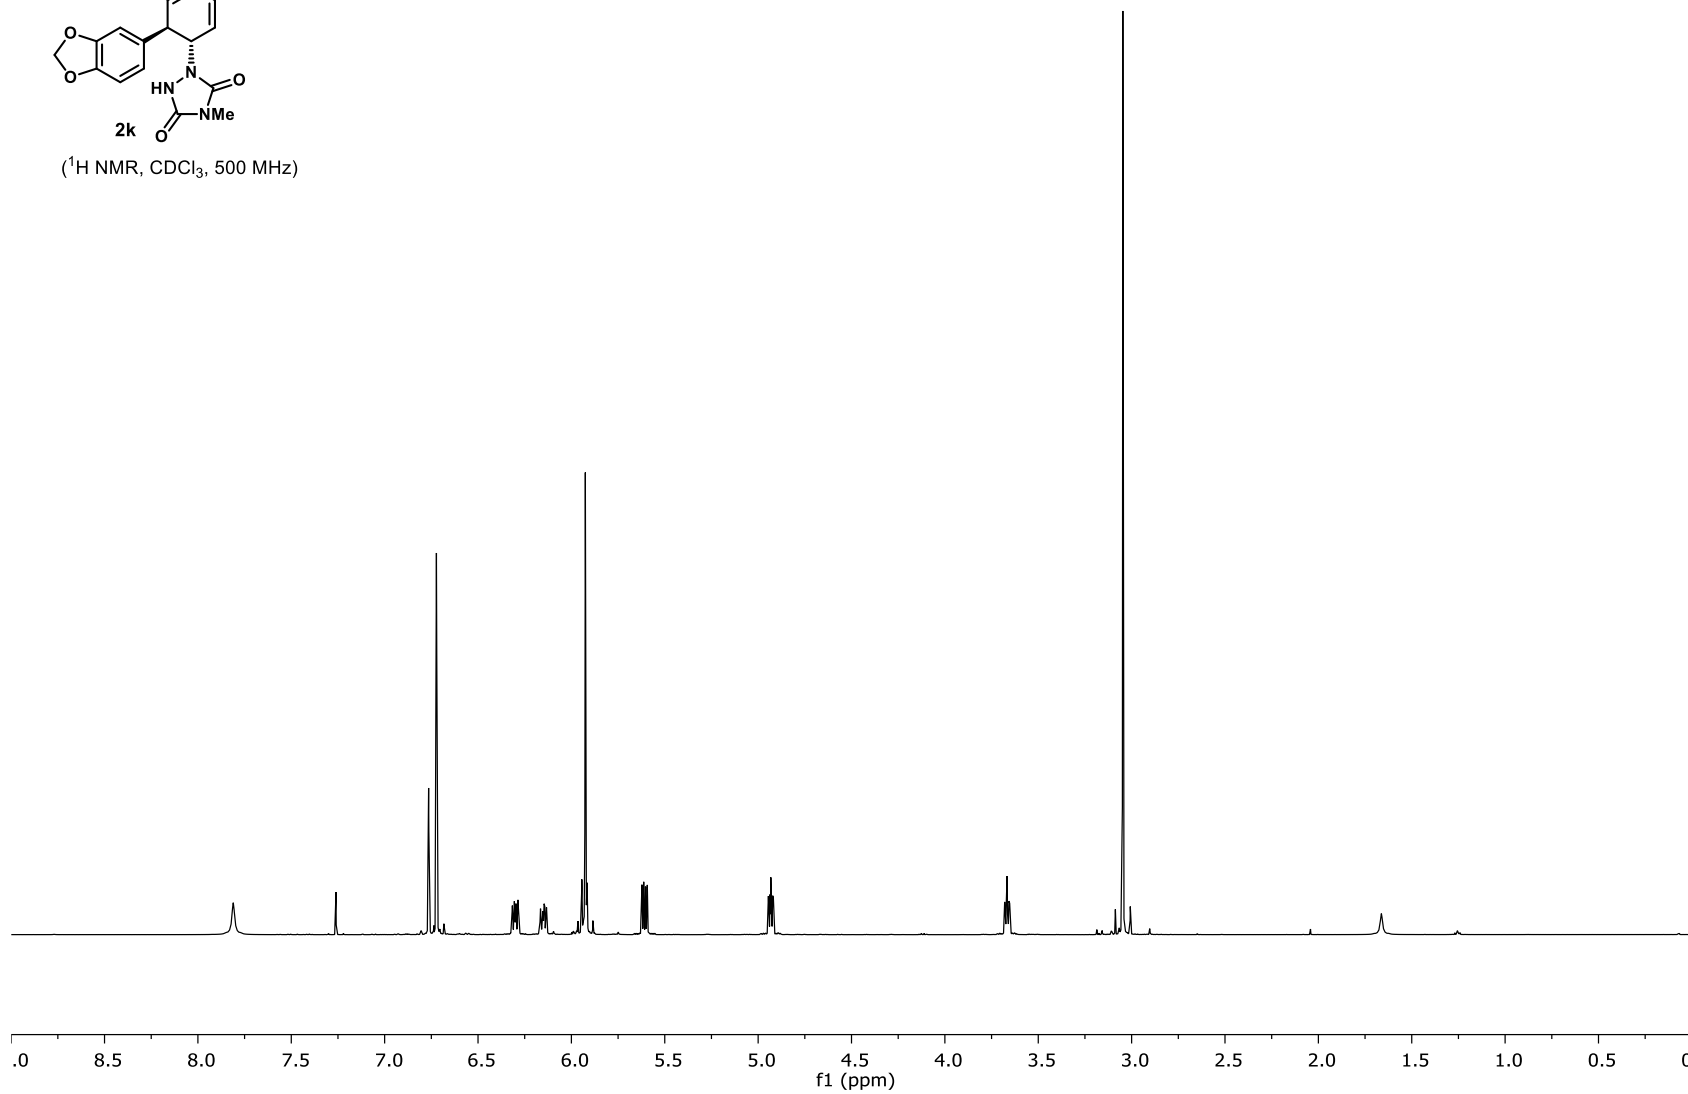

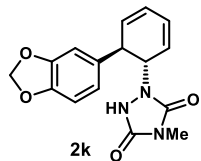

(<sup>13</sup>C NMR, CDCl<sub>3</sub>, 126 MHz)

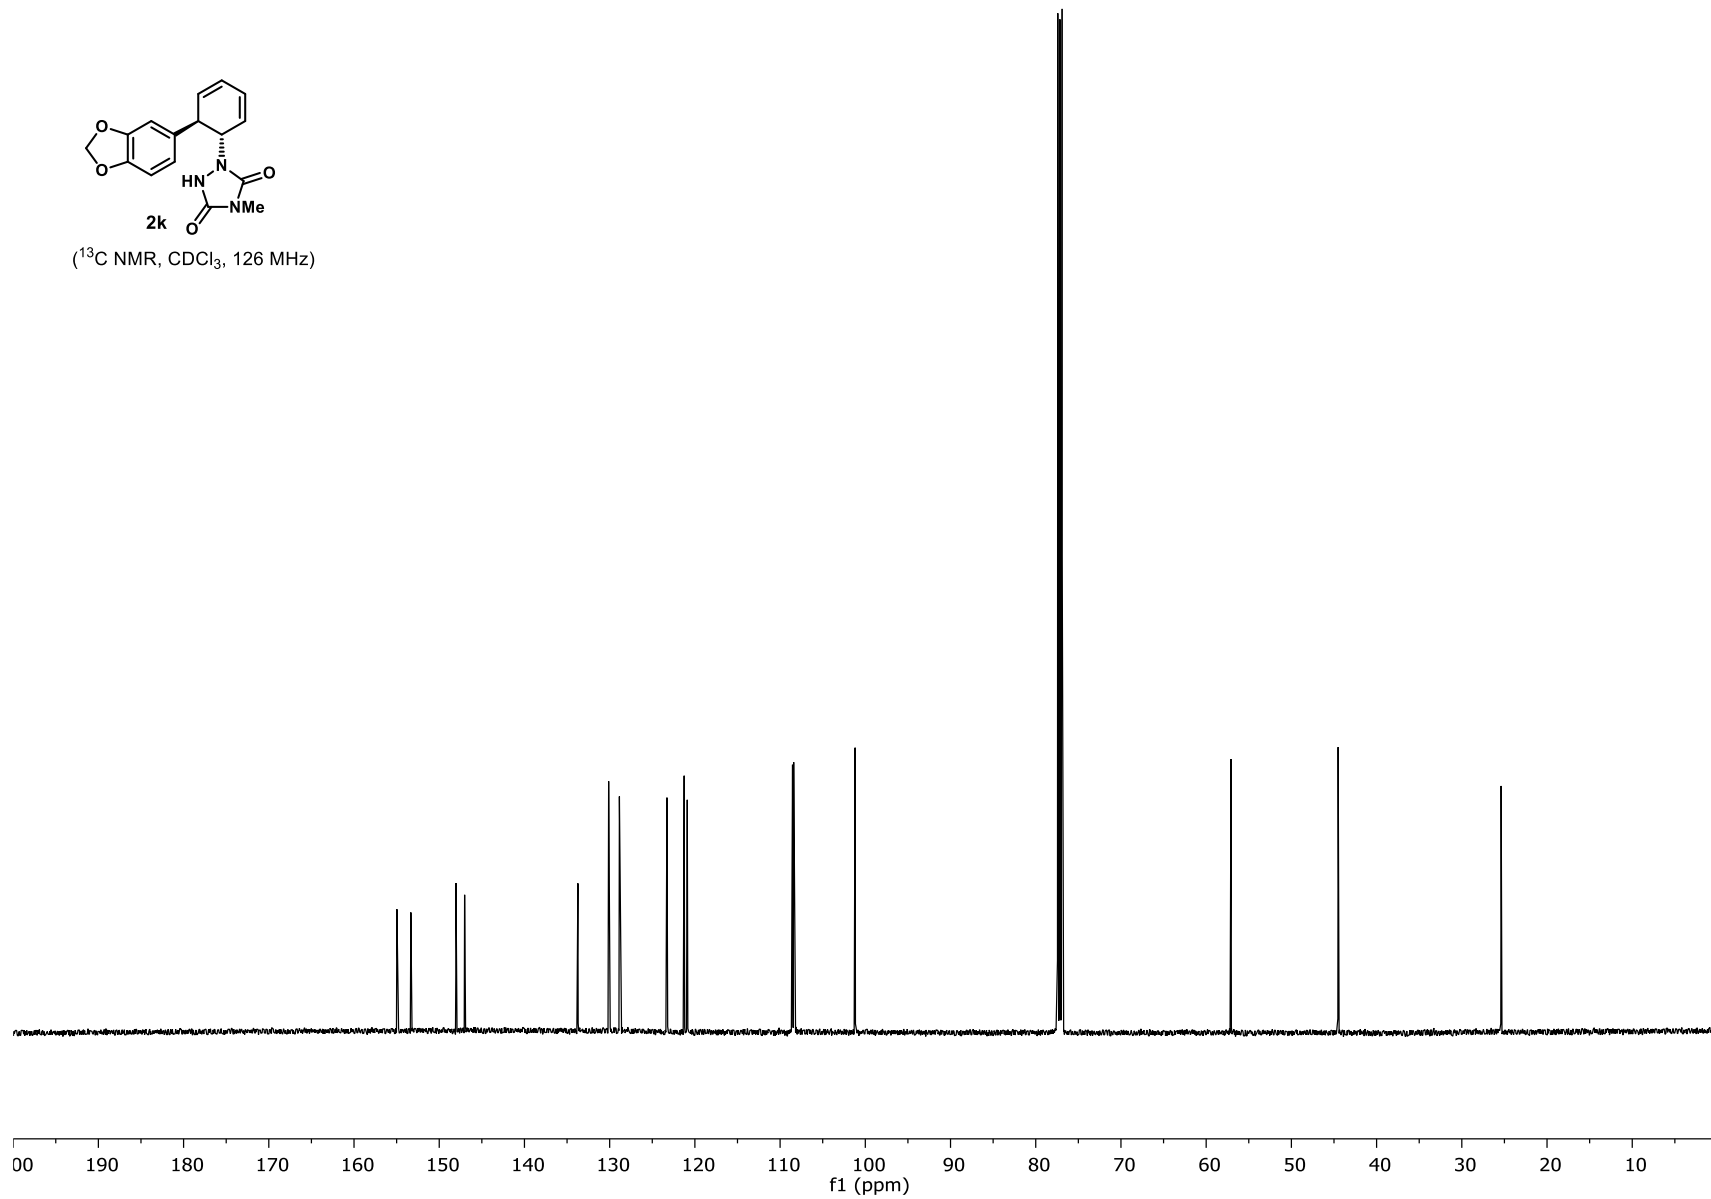

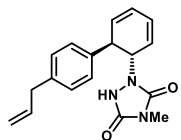

**21**  
(<sup>1</sup>H NMR, CDCl<sub>3</sub>, 500 MHz)

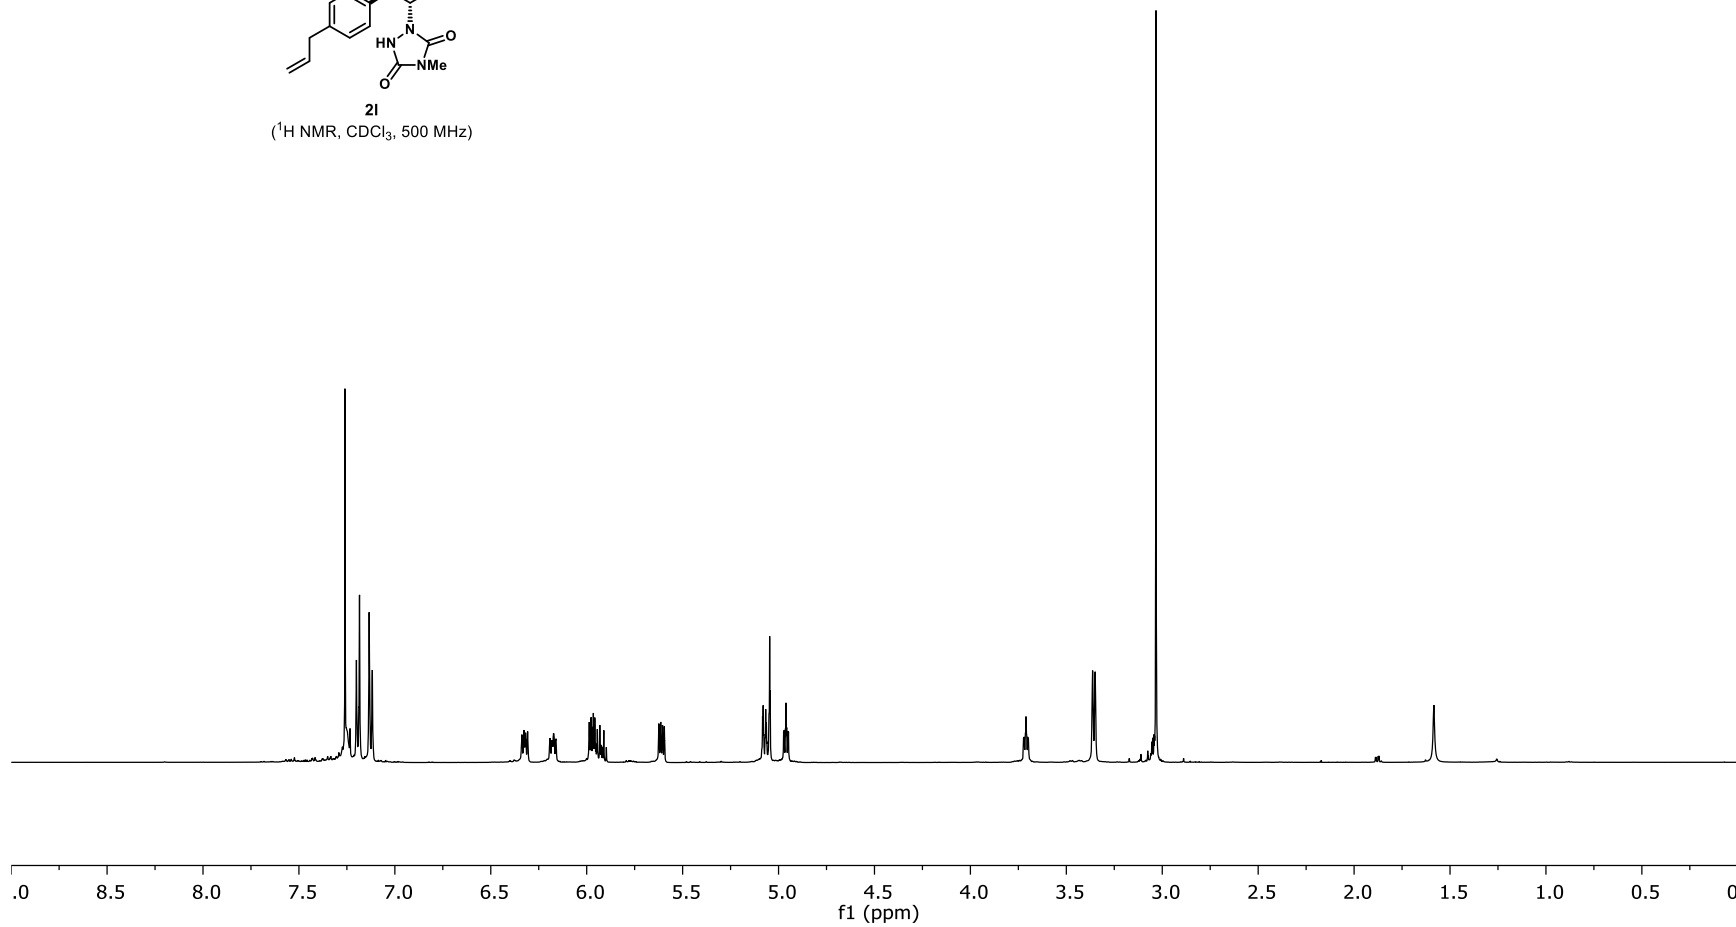

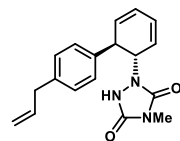

2I  
(<sup>13</sup>C NMR, CDCl<sub>3</sub>, 126 MHz)

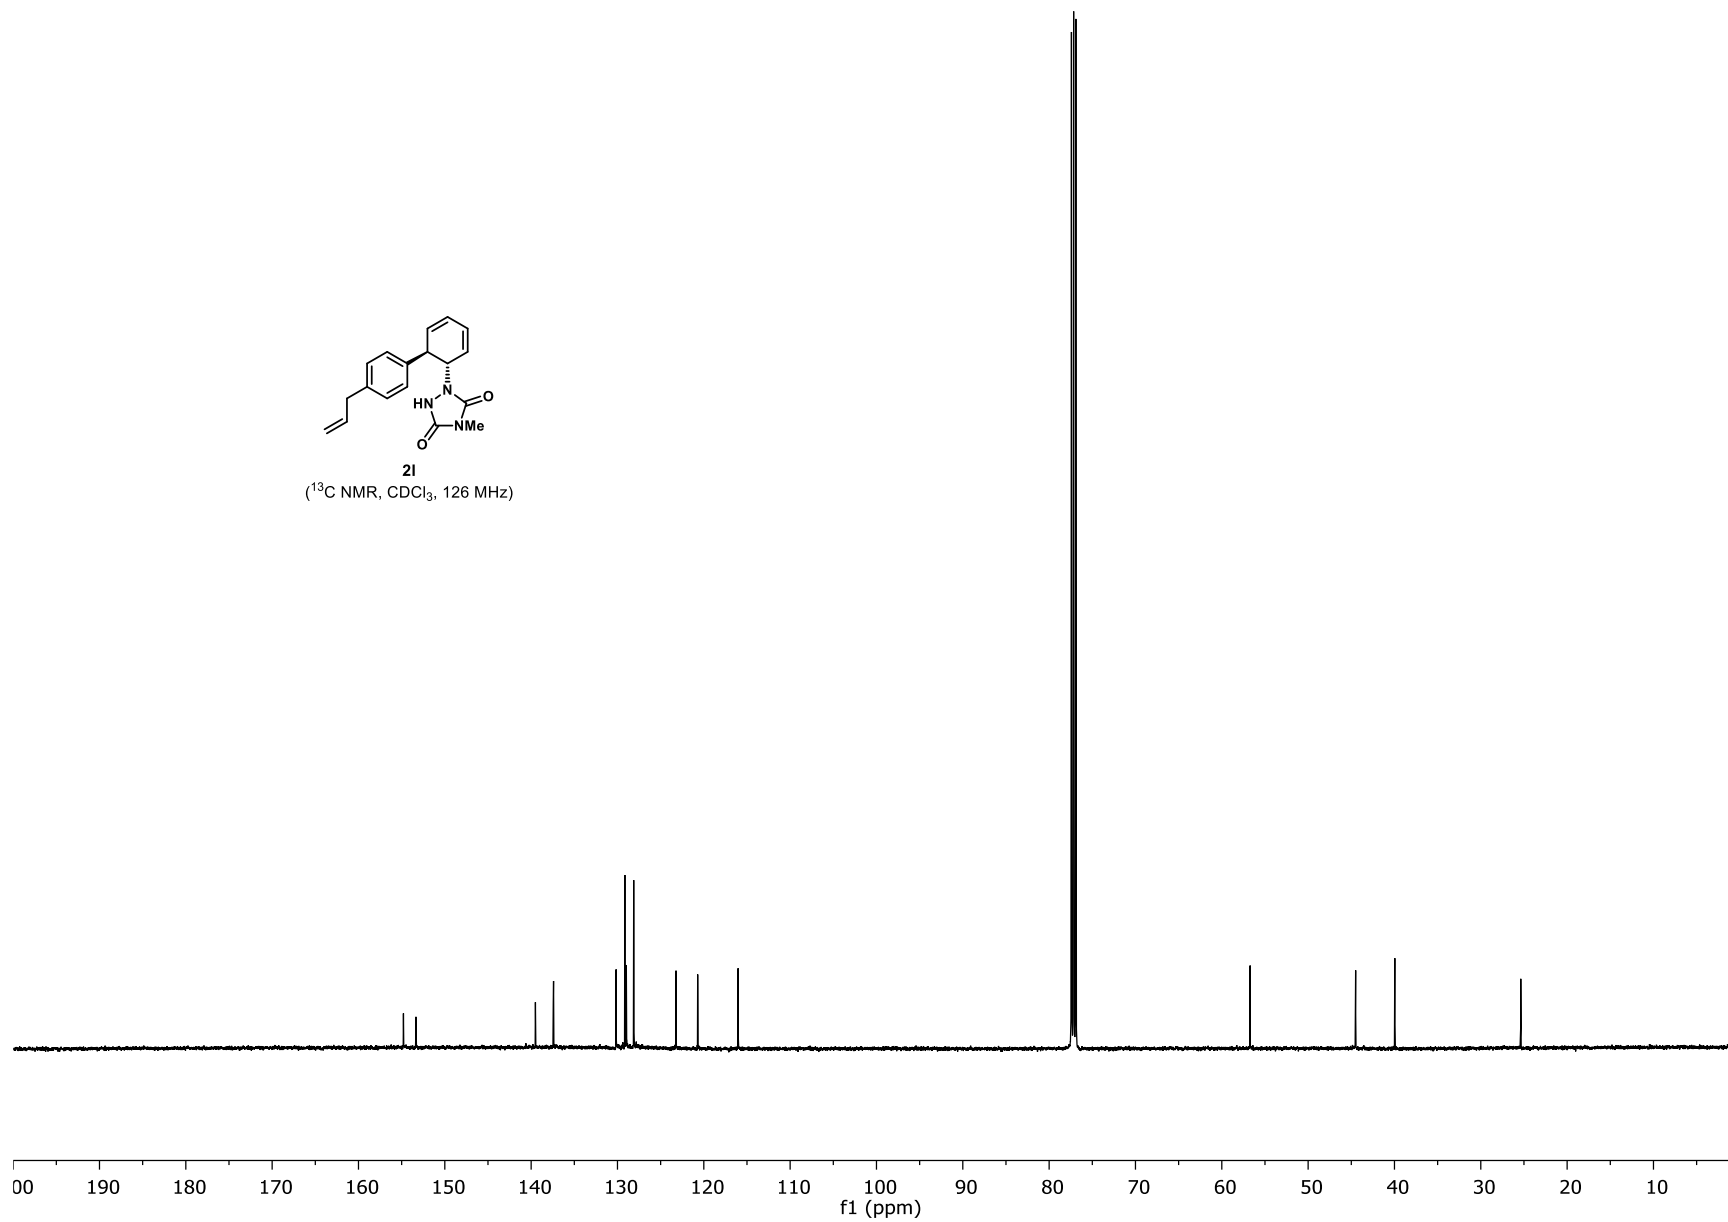



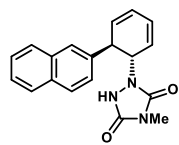

2m

(<sup>1</sup>H NMR, CDCl<sub>3</sub>, 500 MHz)

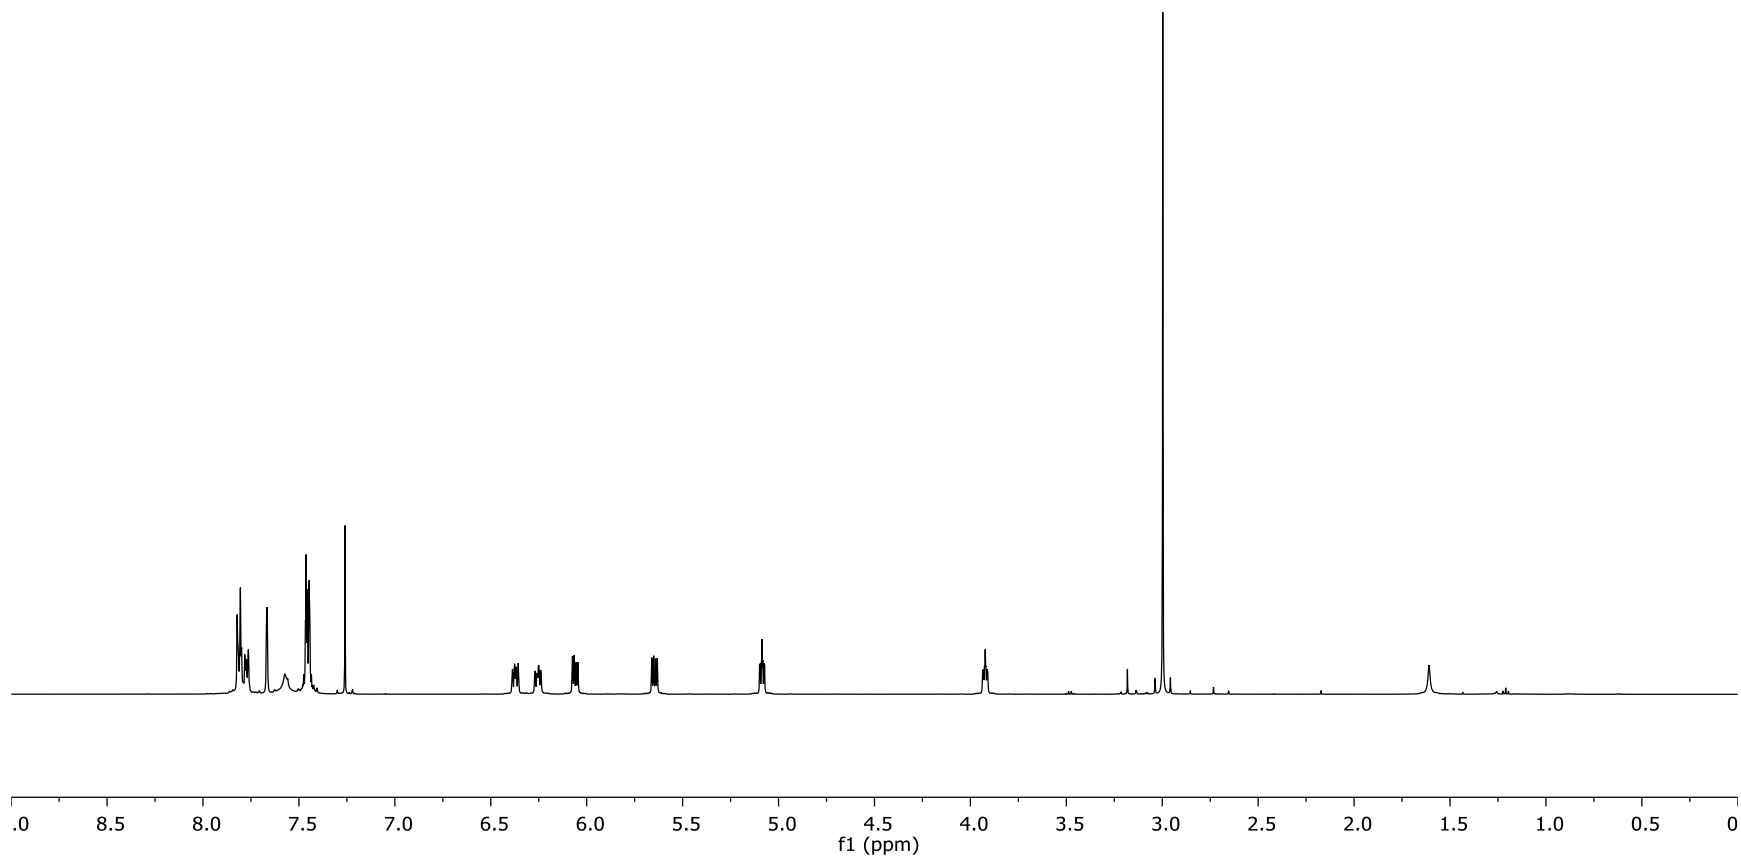

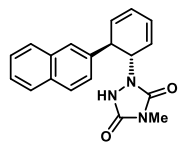

**2m**

(<sup>13</sup>C NMR, CDCl<sub>3</sub>, 126 MHz)

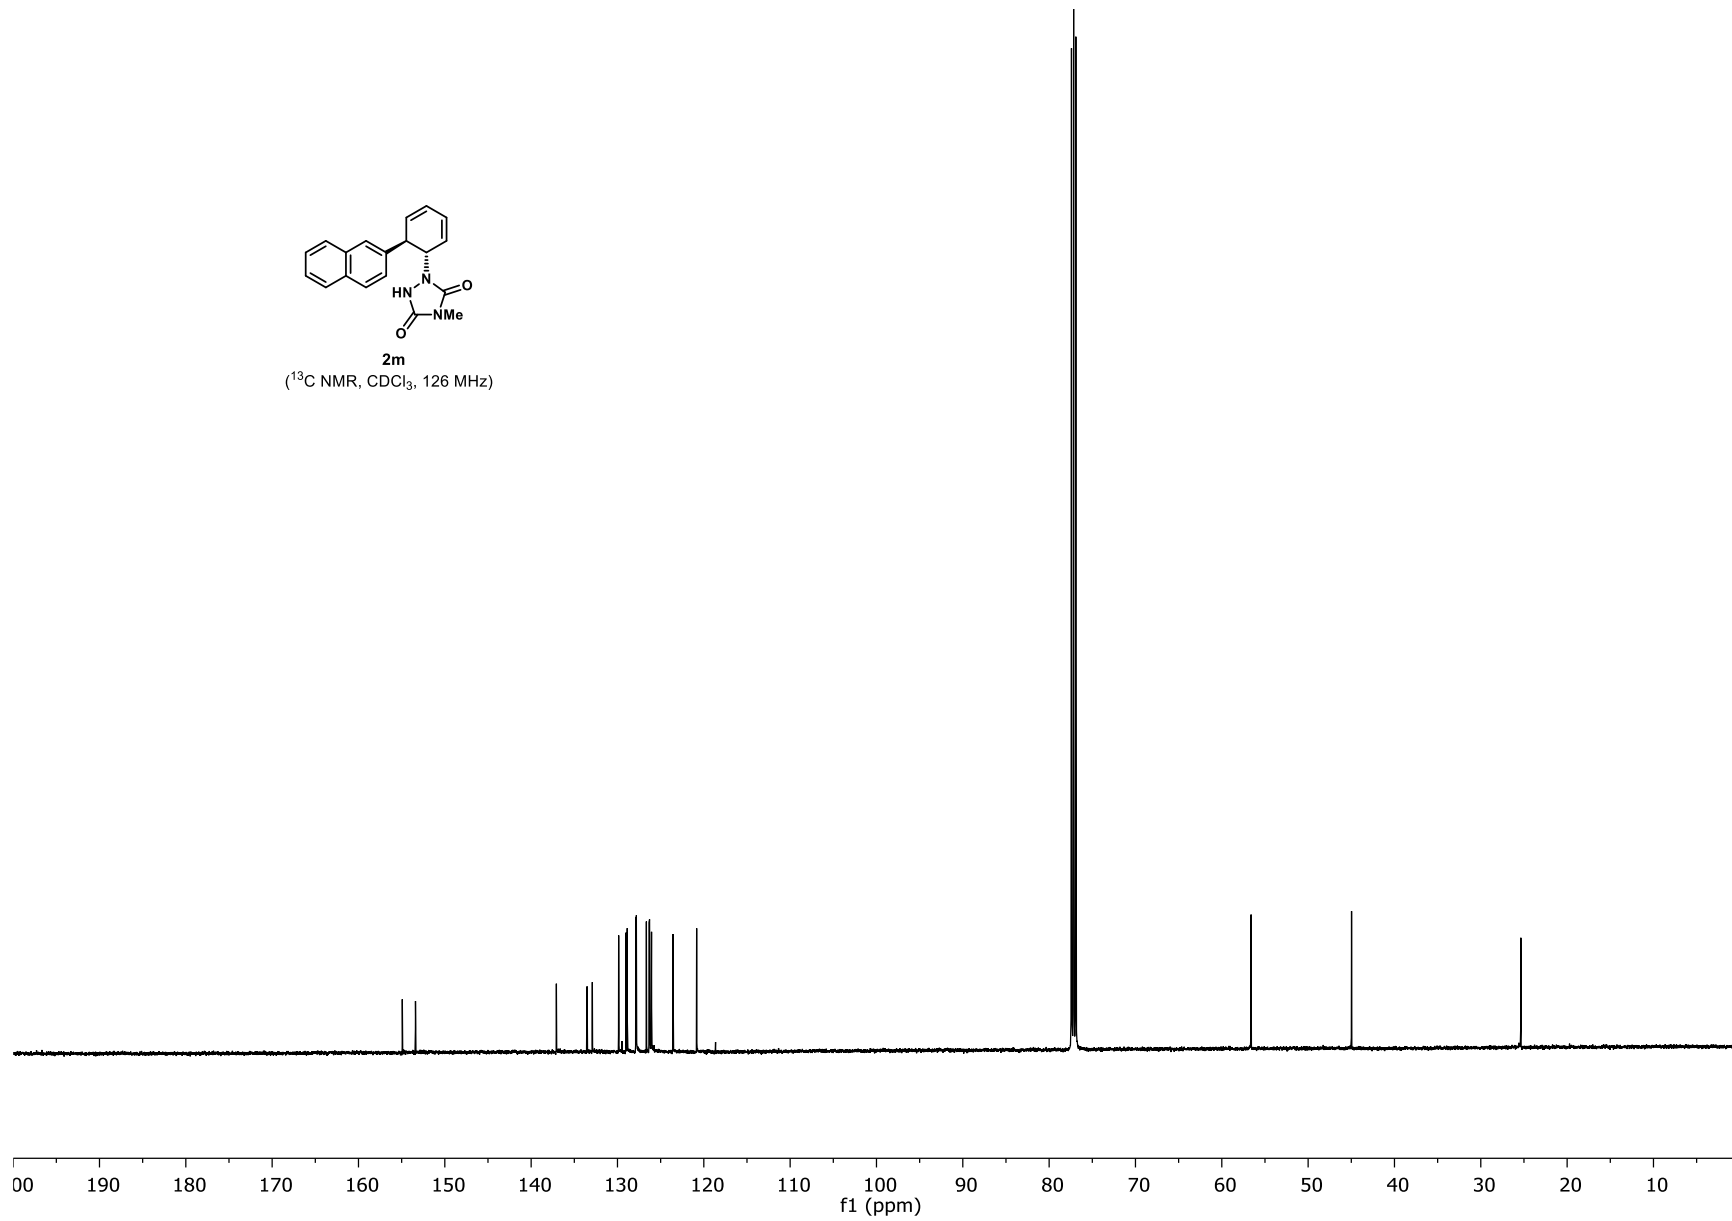

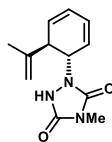

**2n**  
(<sup>1</sup>H NMR, CDCl<sub>3</sub>, 500 MHz)

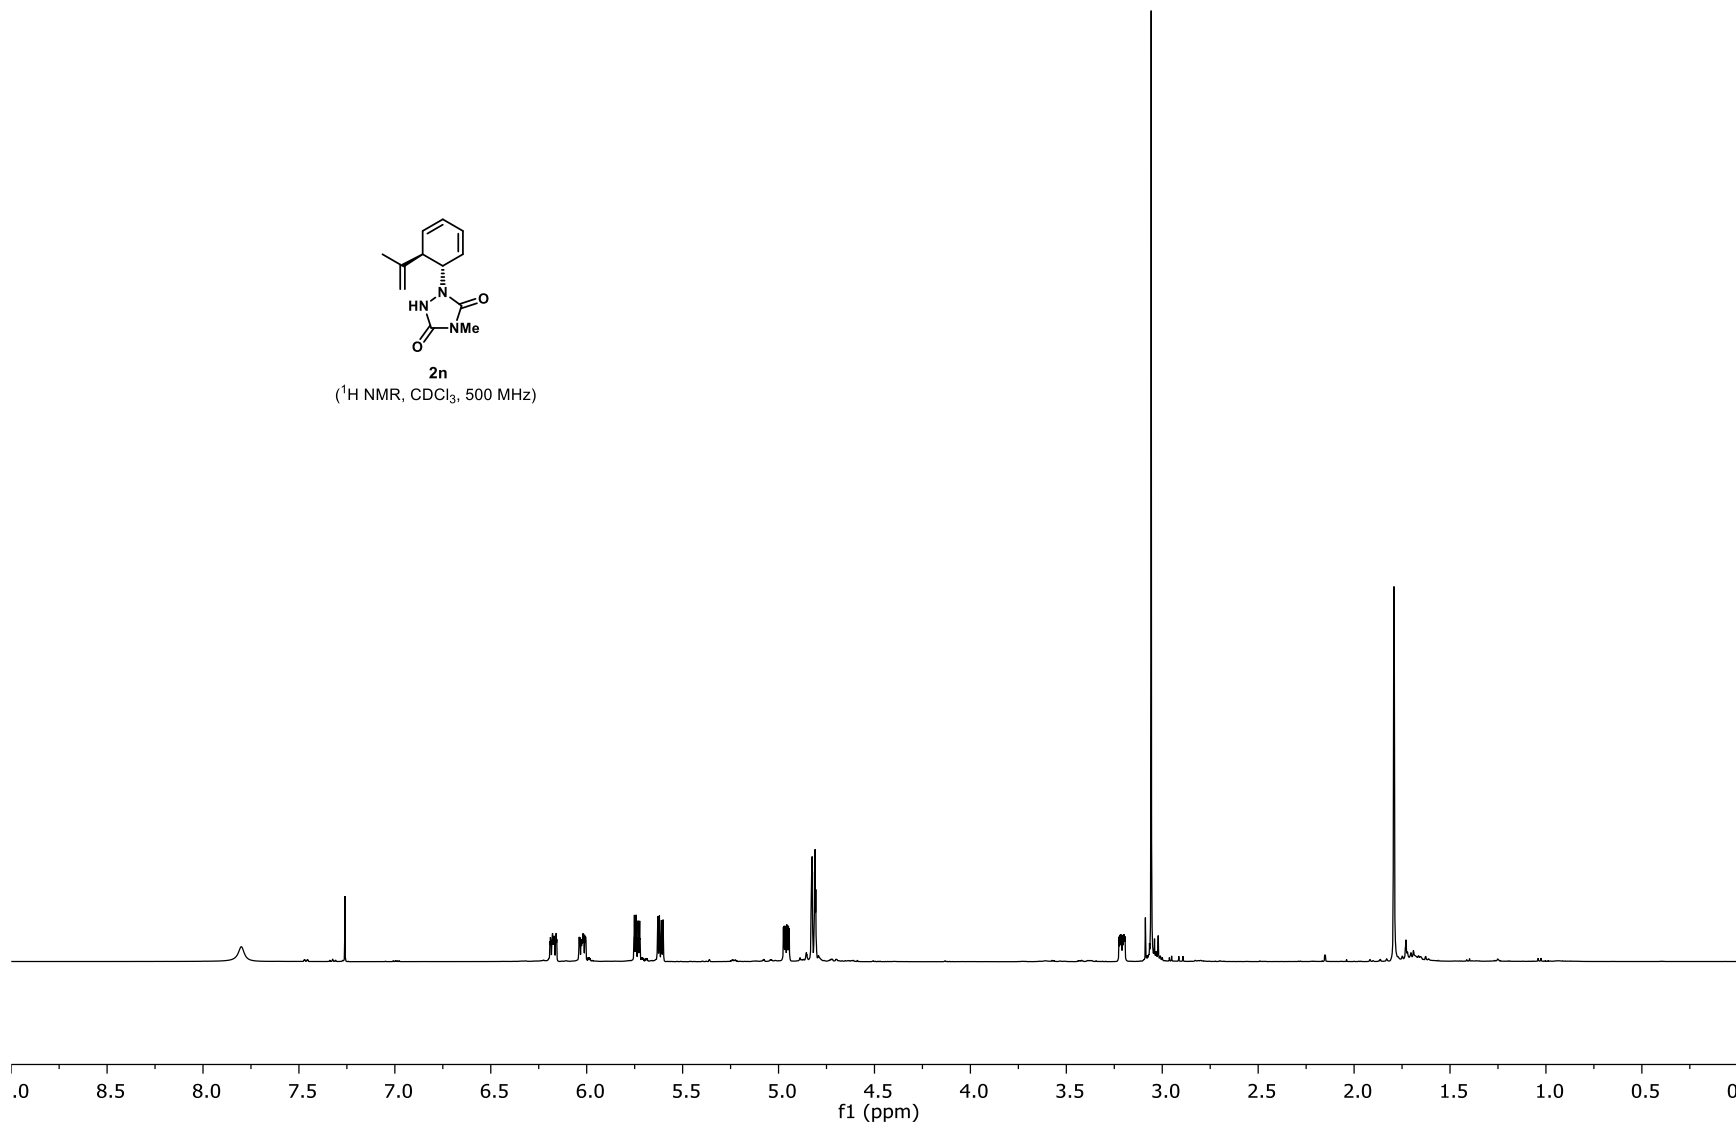

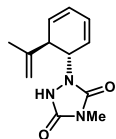

2n

(<sup>13</sup>C NMR, CDCl<sub>3</sub>, 126 MHz)

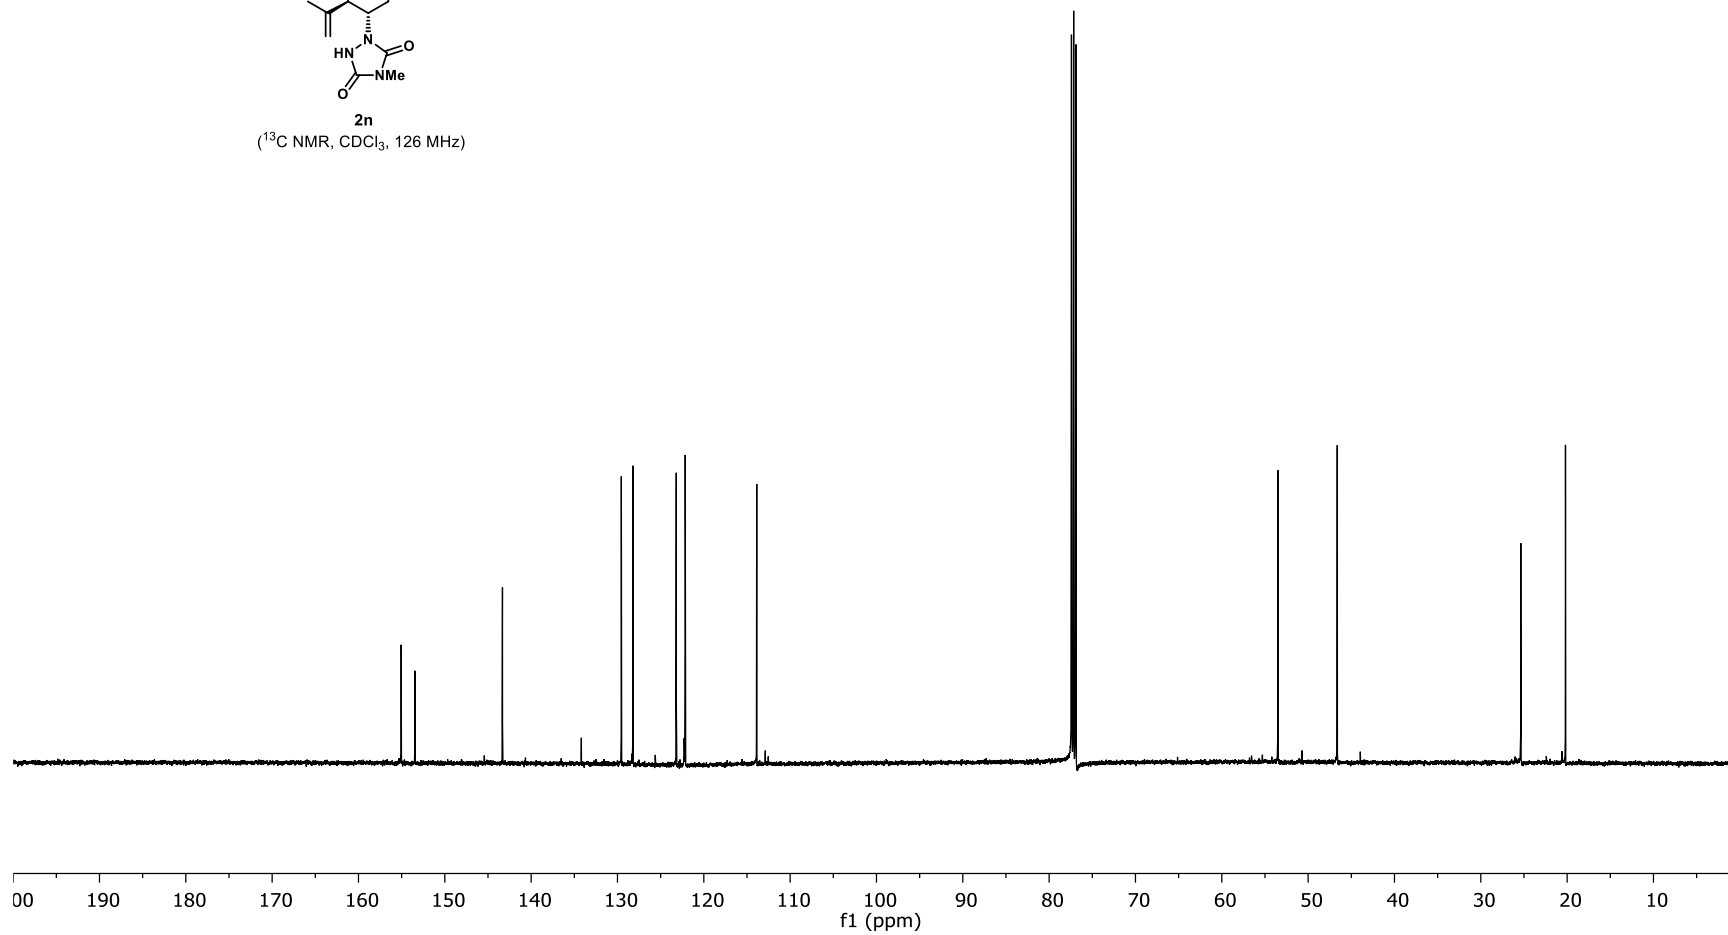

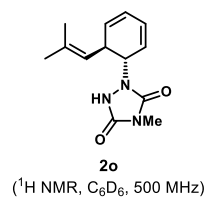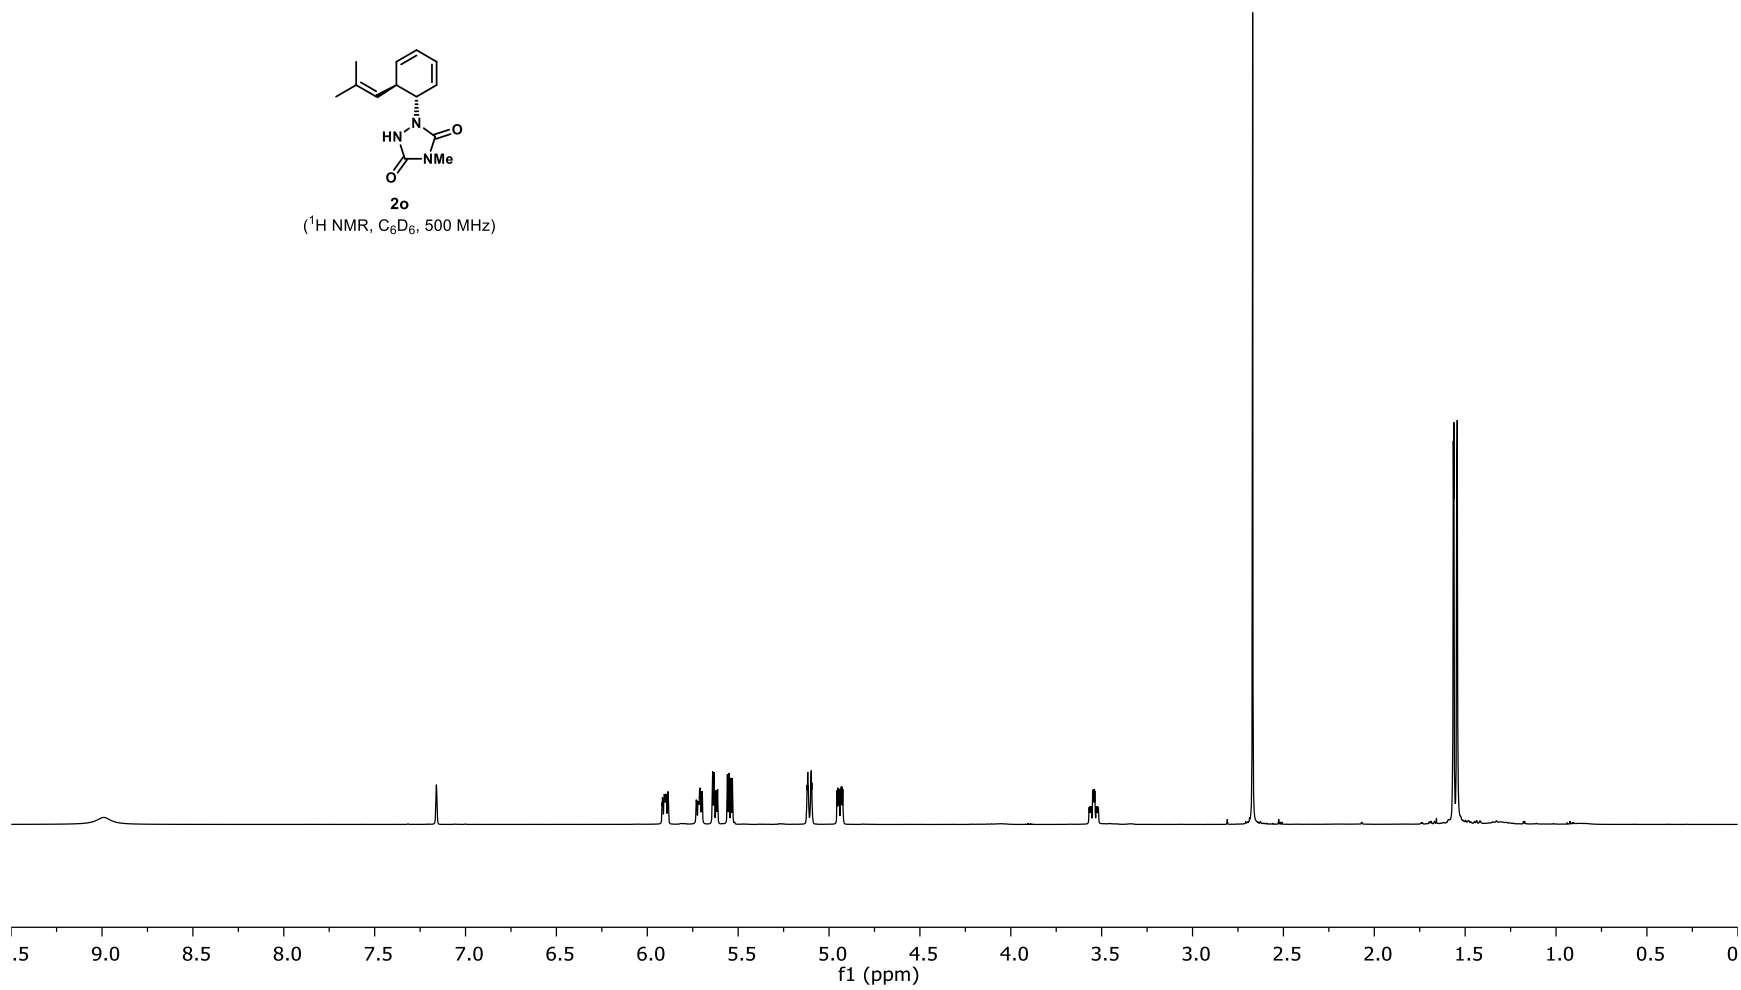

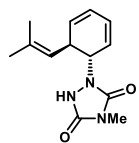

2o

(<sup>13</sup>C NMR, C<sub>6</sub>D<sub>6</sub>, 126 MHz)

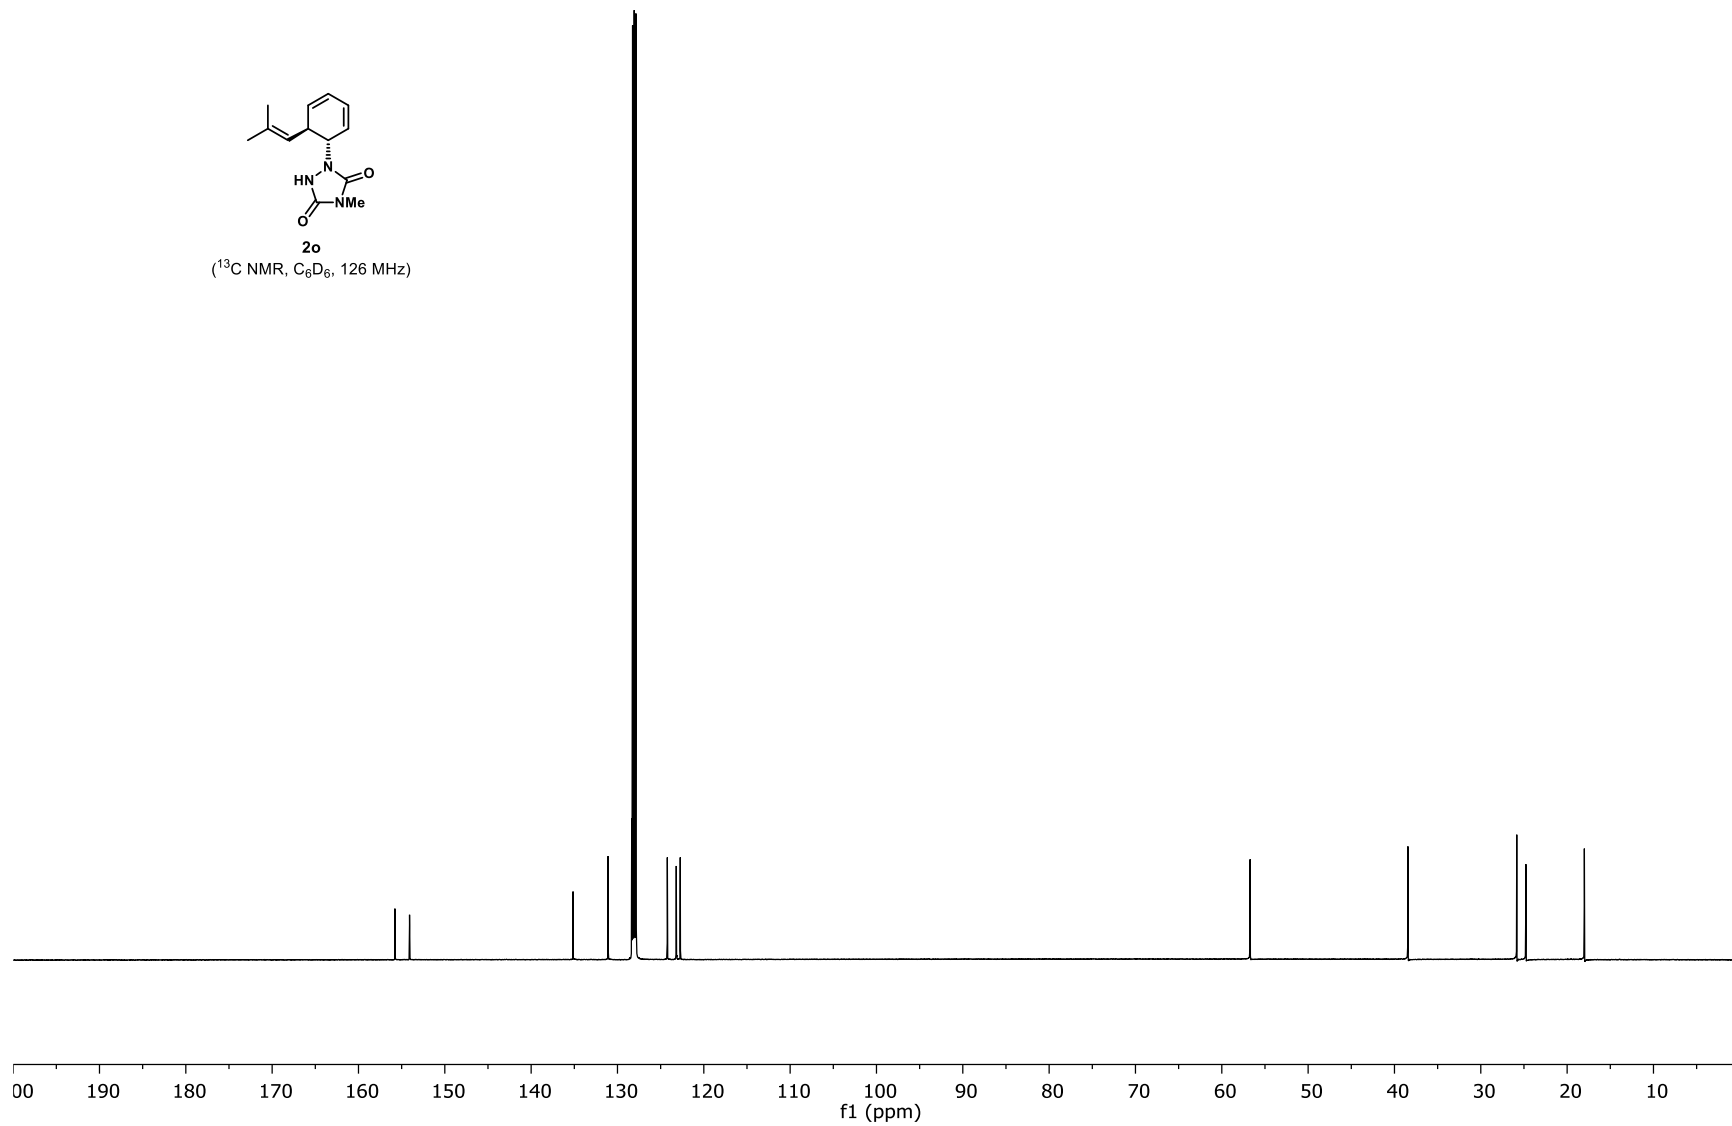

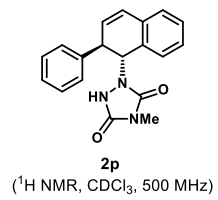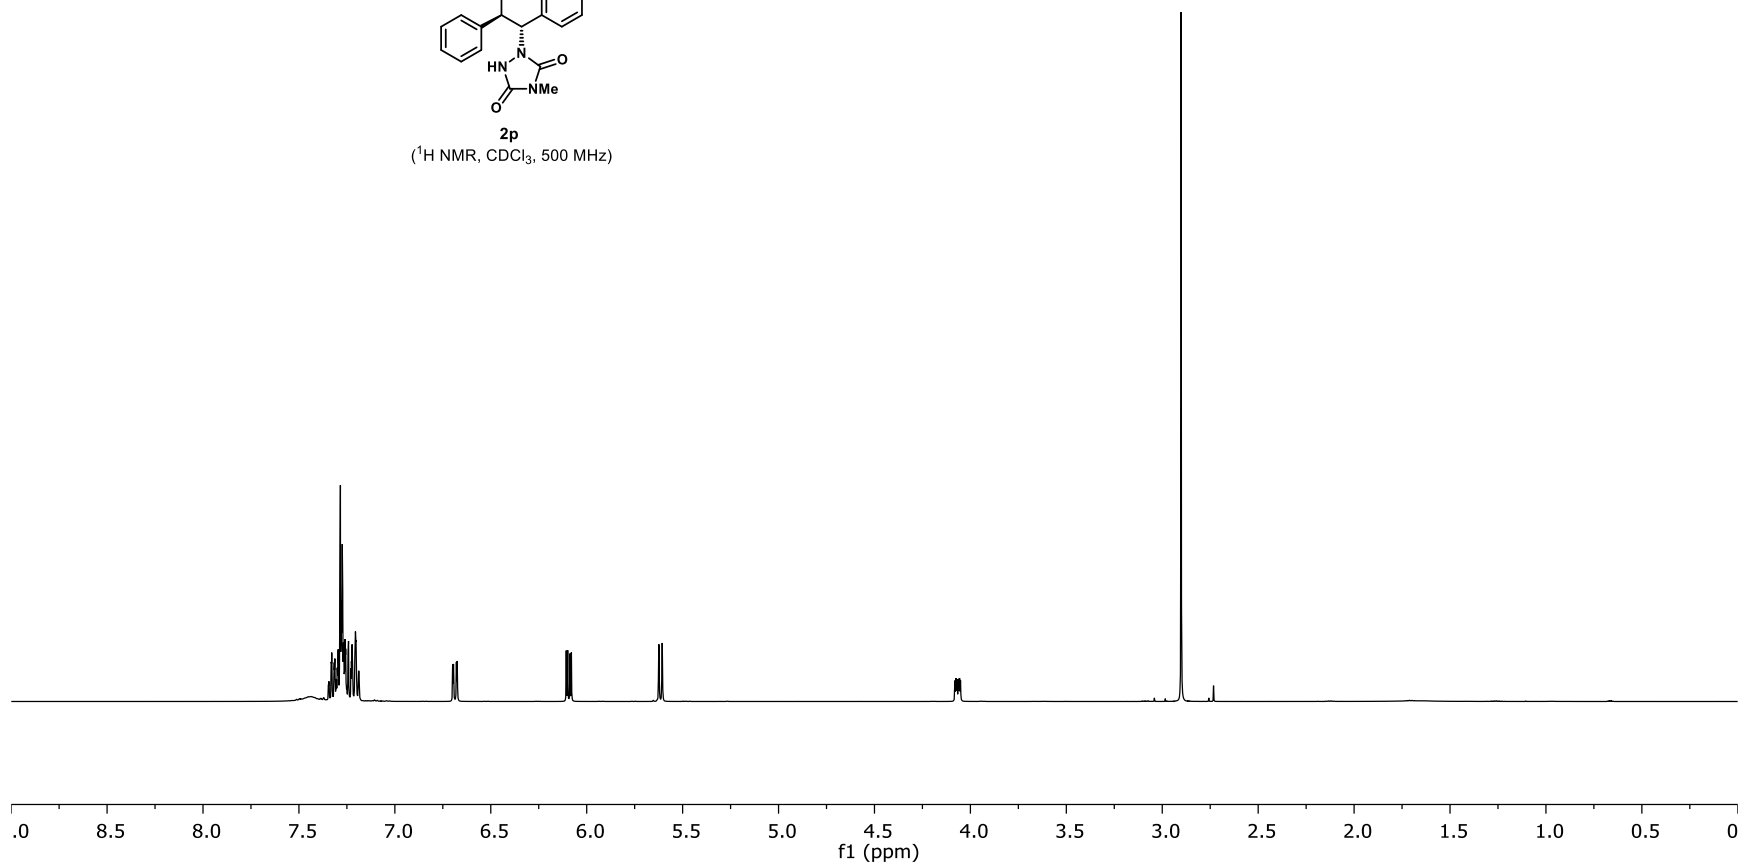

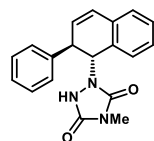

**2p**

(<sup>13</sup>C NMR, CDCl<sub>3</sub>, 126 MHz)

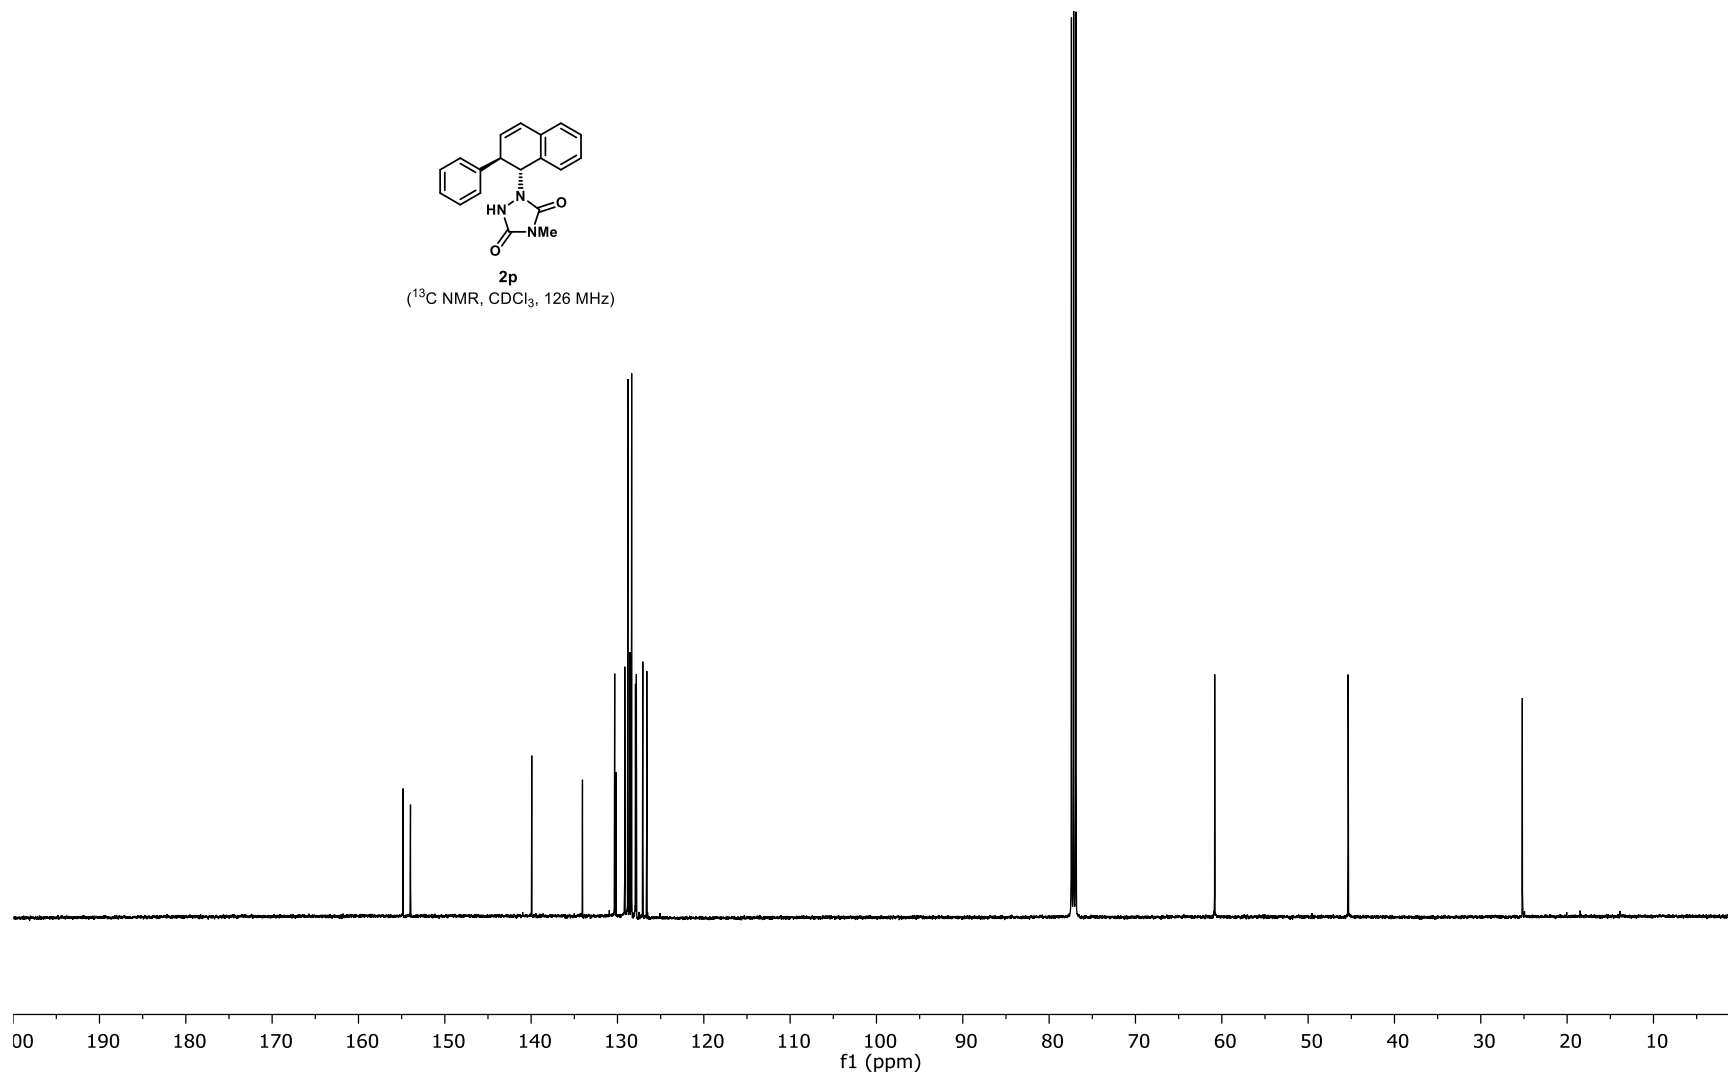



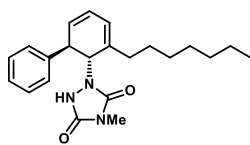

**3a**

(<sup>1</sup>H NMR, CDCl<sub>3</sub>, 500 MHz)

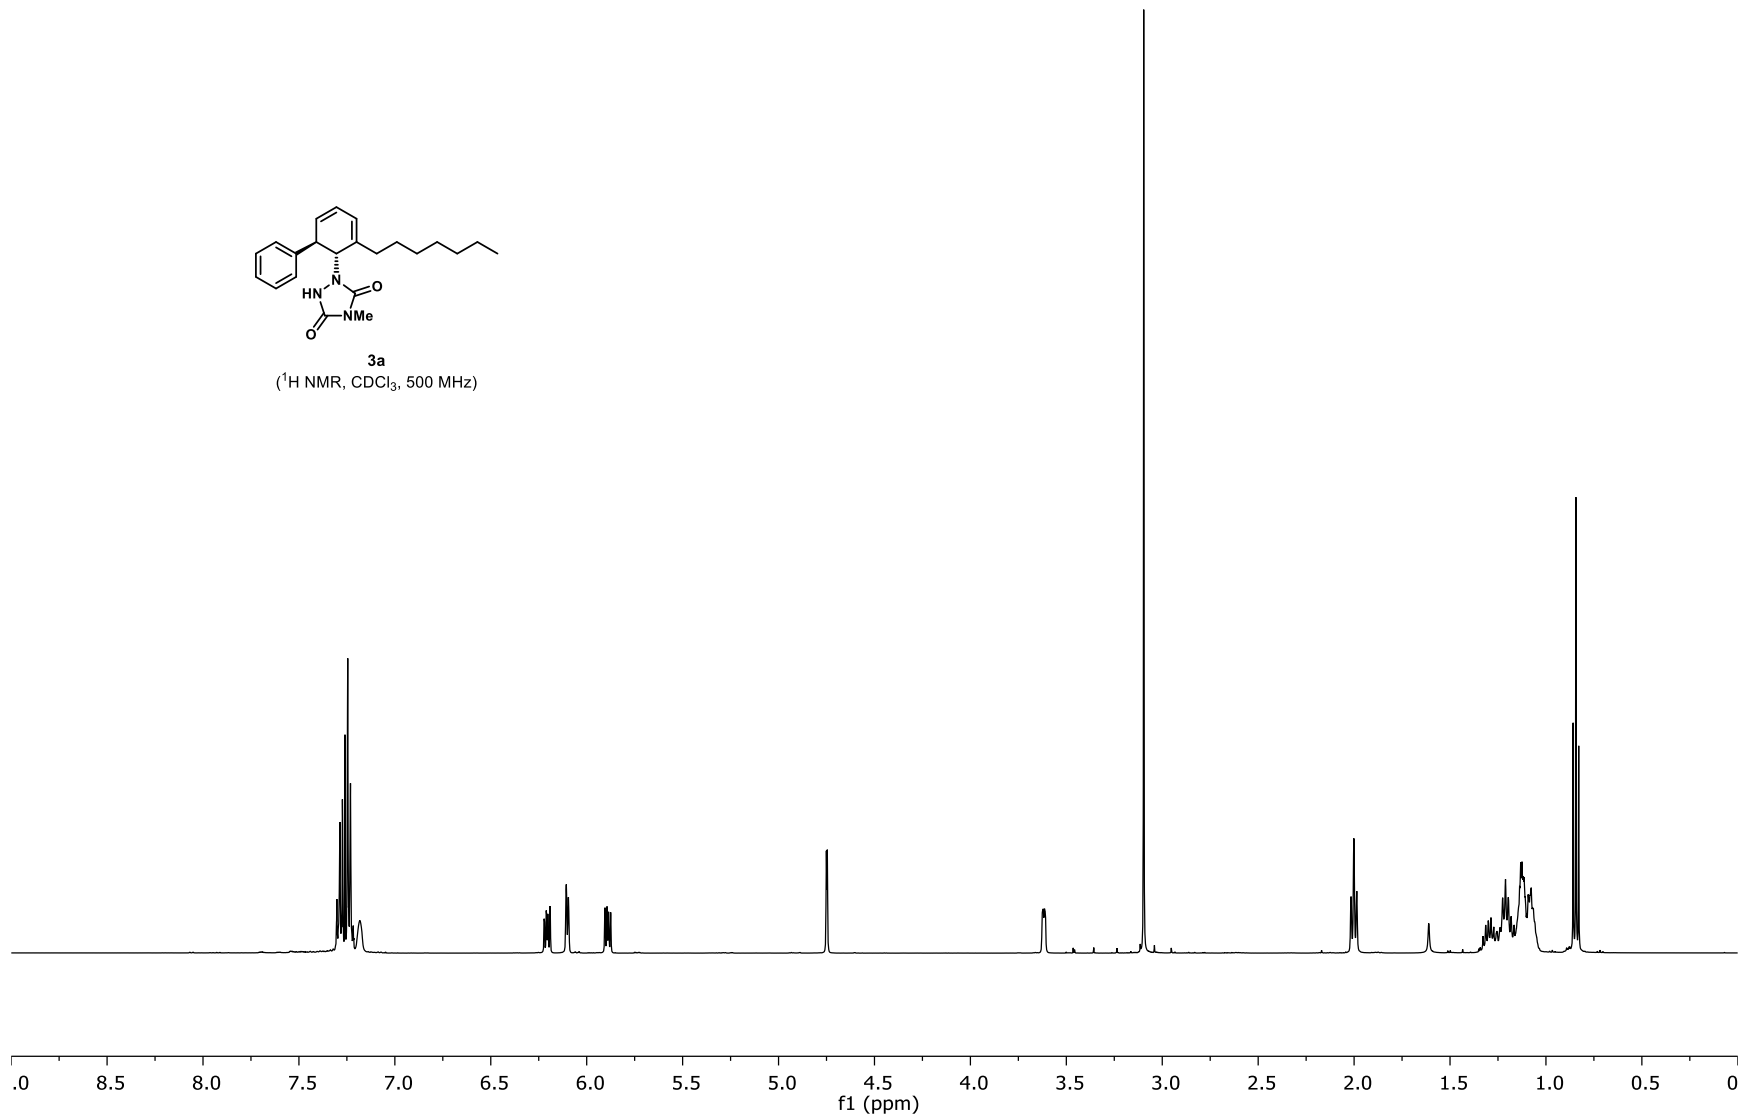

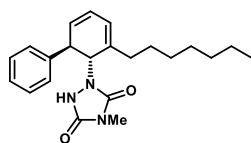

**3a**  
(<sup>13</sup>C NMR, CDCl<sub>3</sub>, 126 MHz)

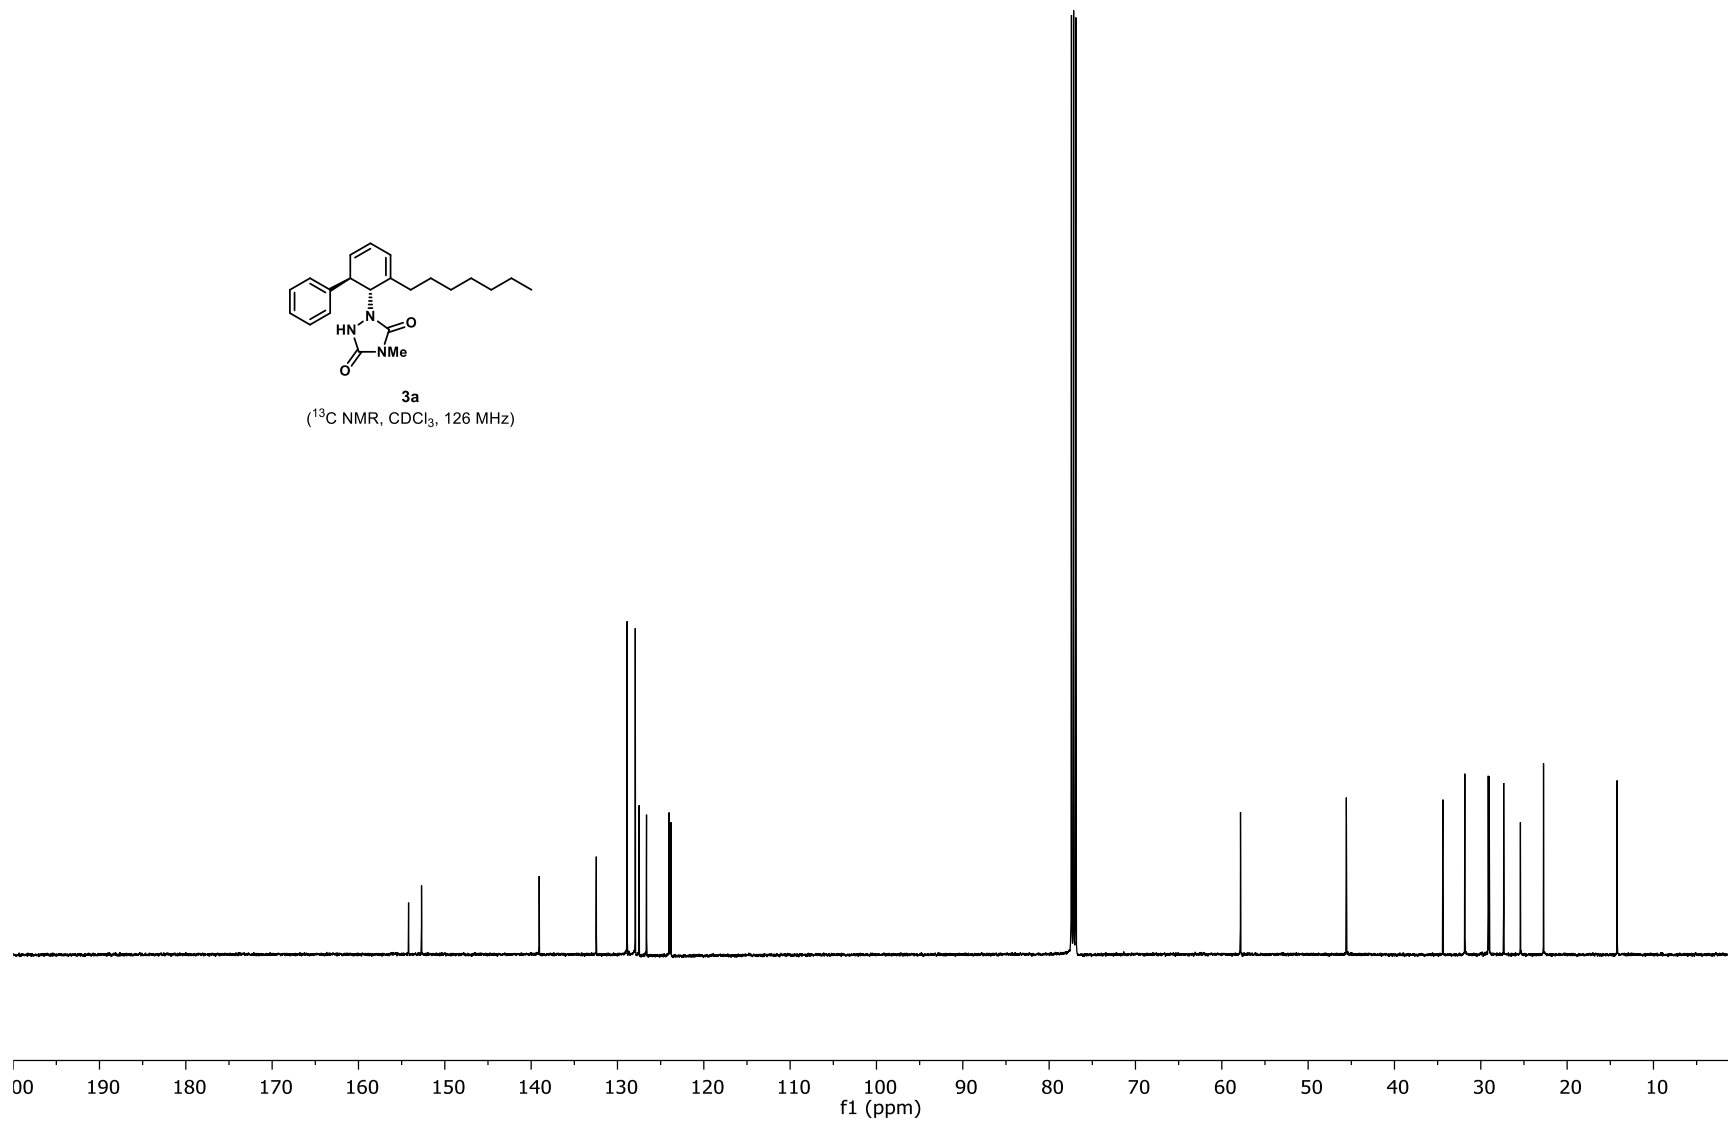

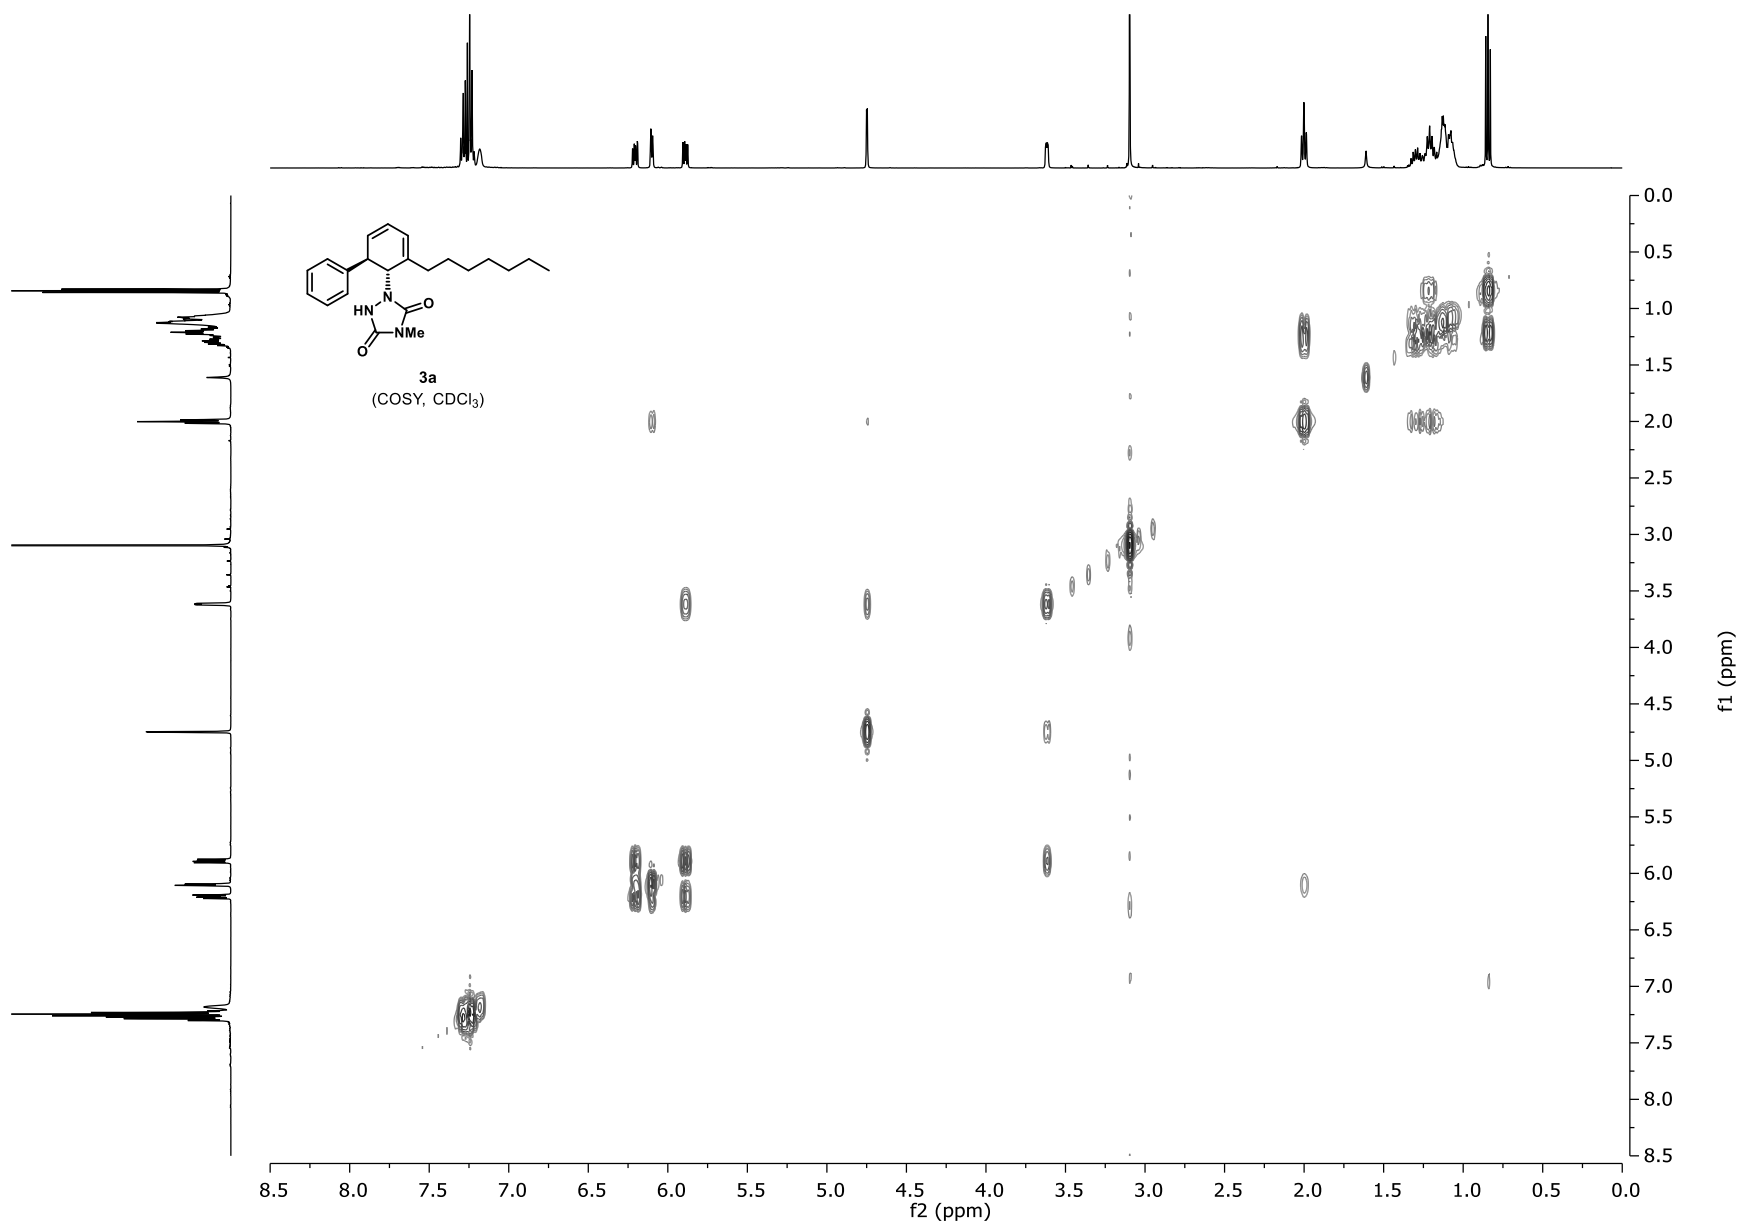

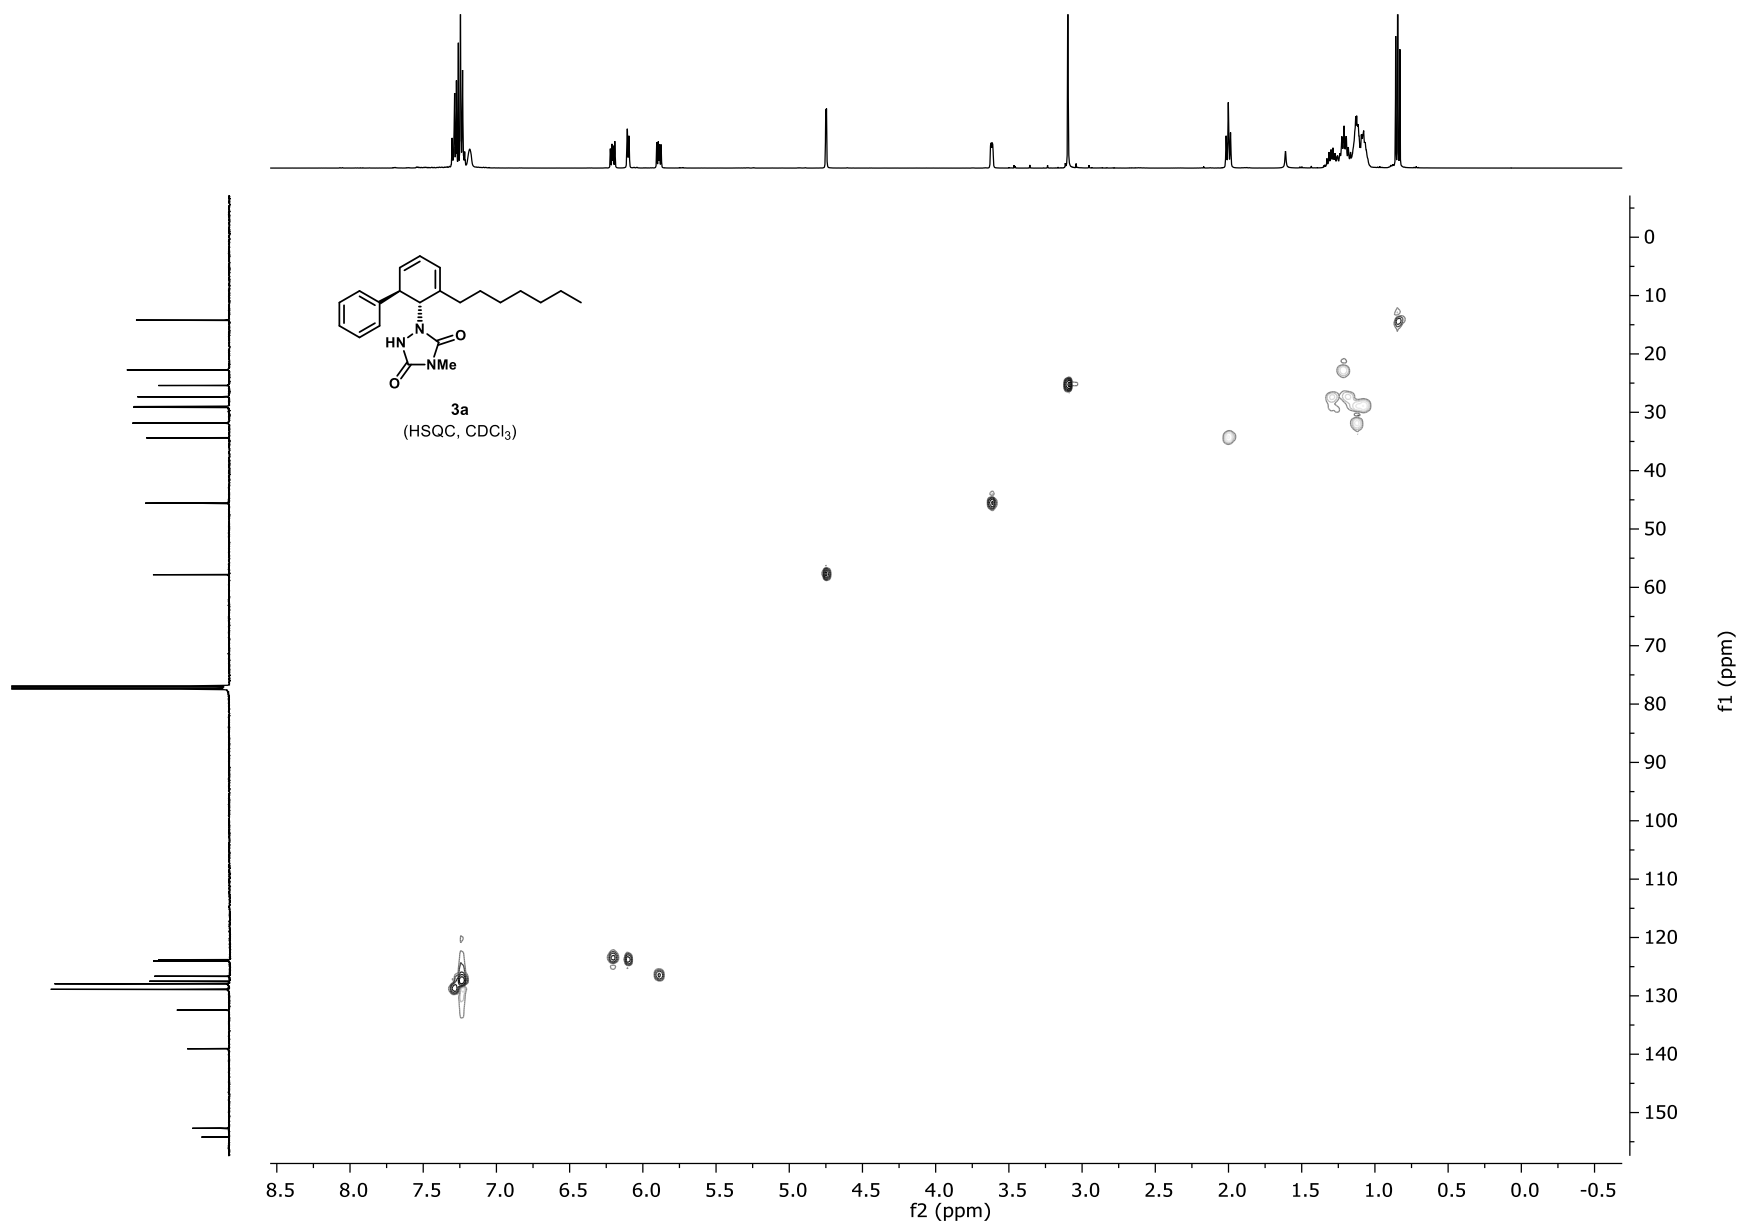

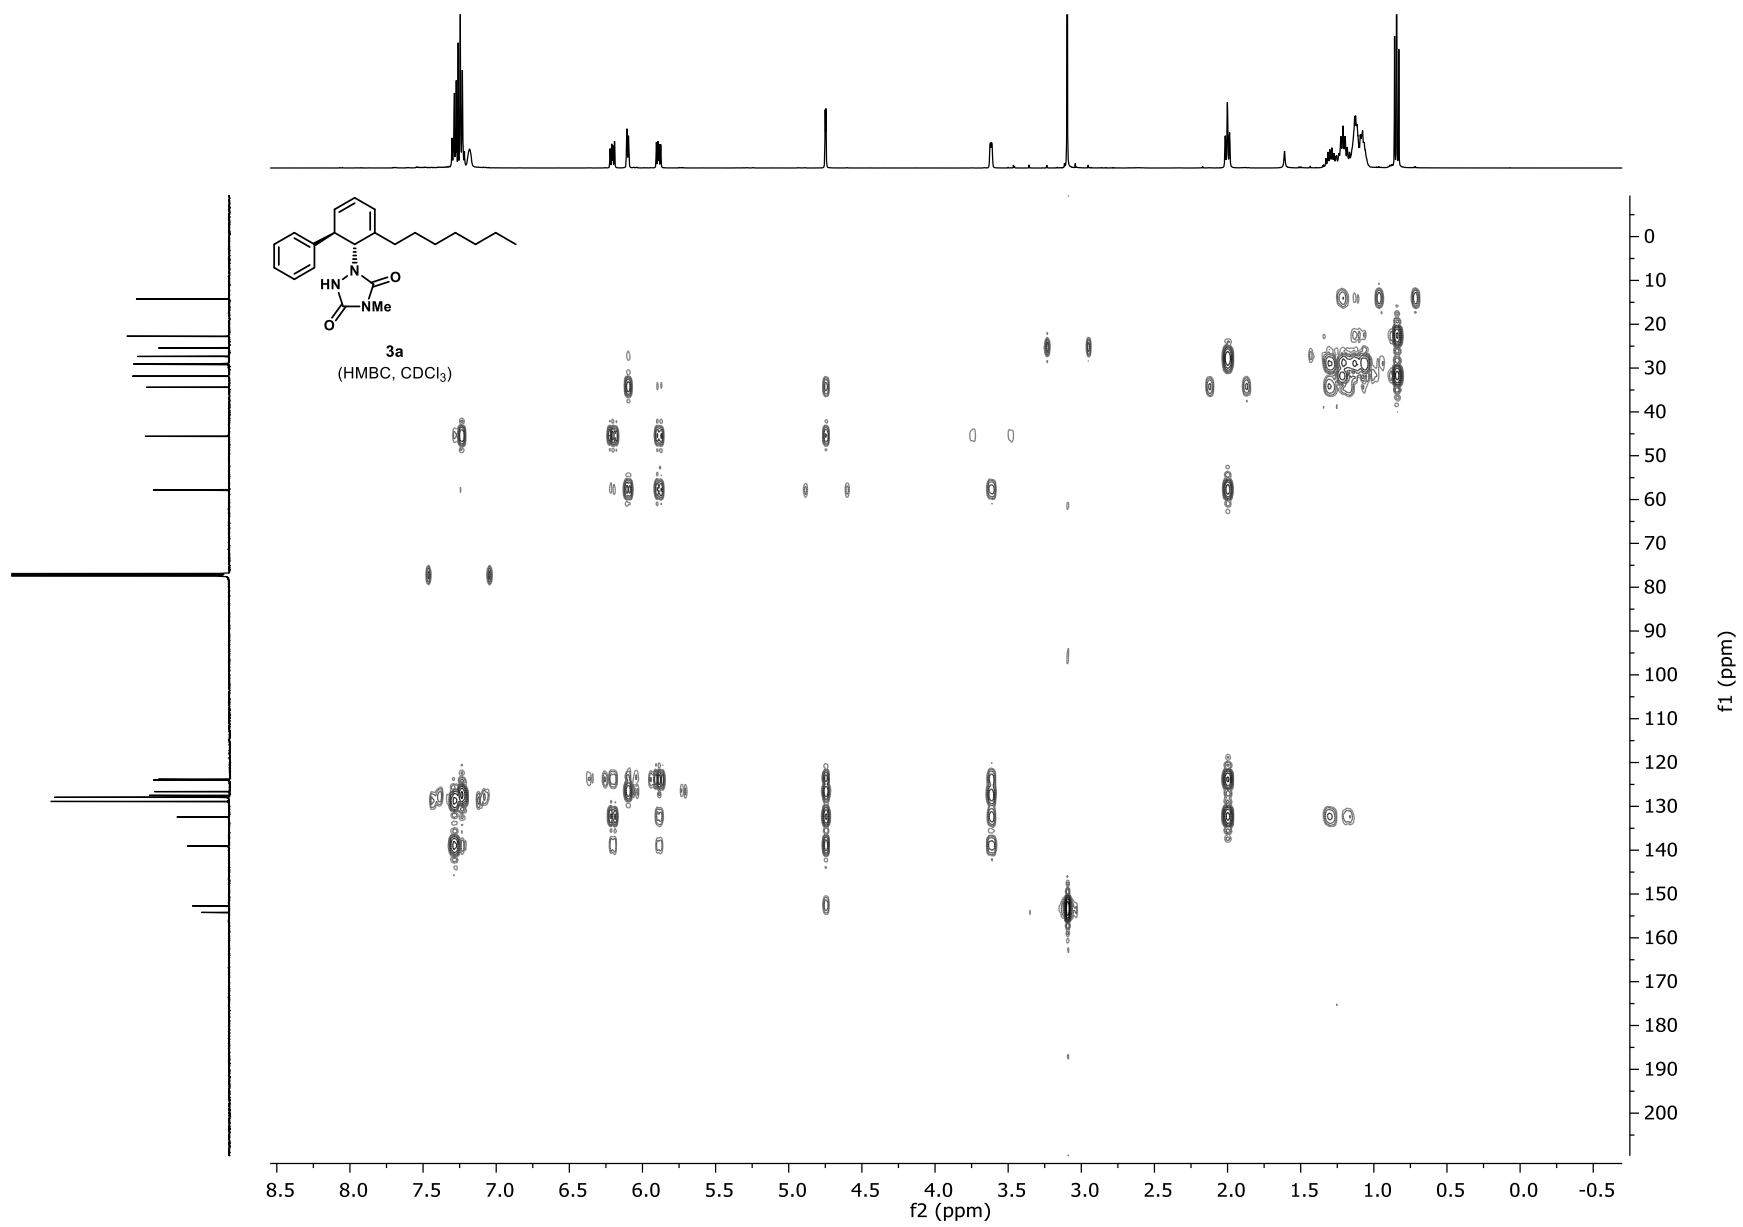

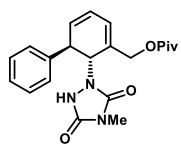

**3b**  
(<sup>1</sup>H NMR, CDCl<sub>3</sub>, 500 MHz)

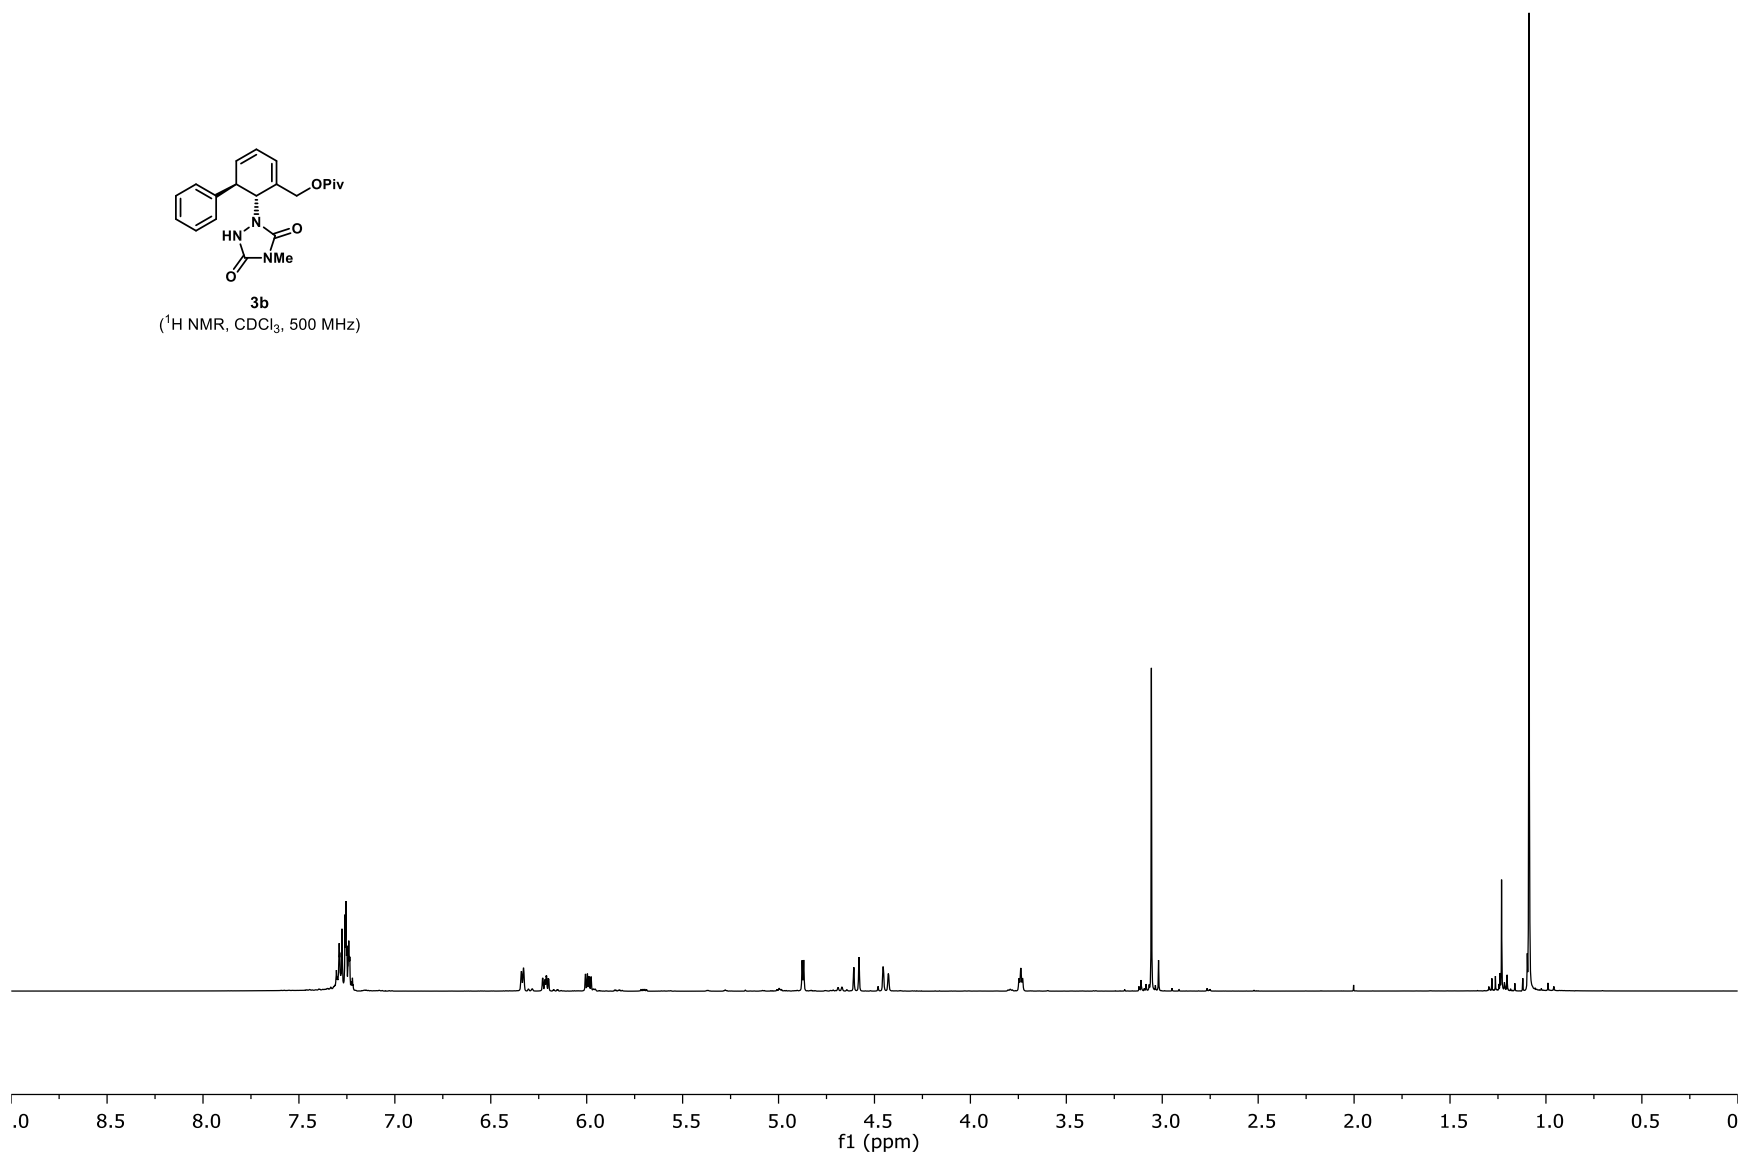

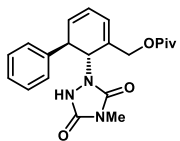

**3b**

(<sup>13</sup>C NMR, CDCl<sub>3</sub>, 126 MHz)

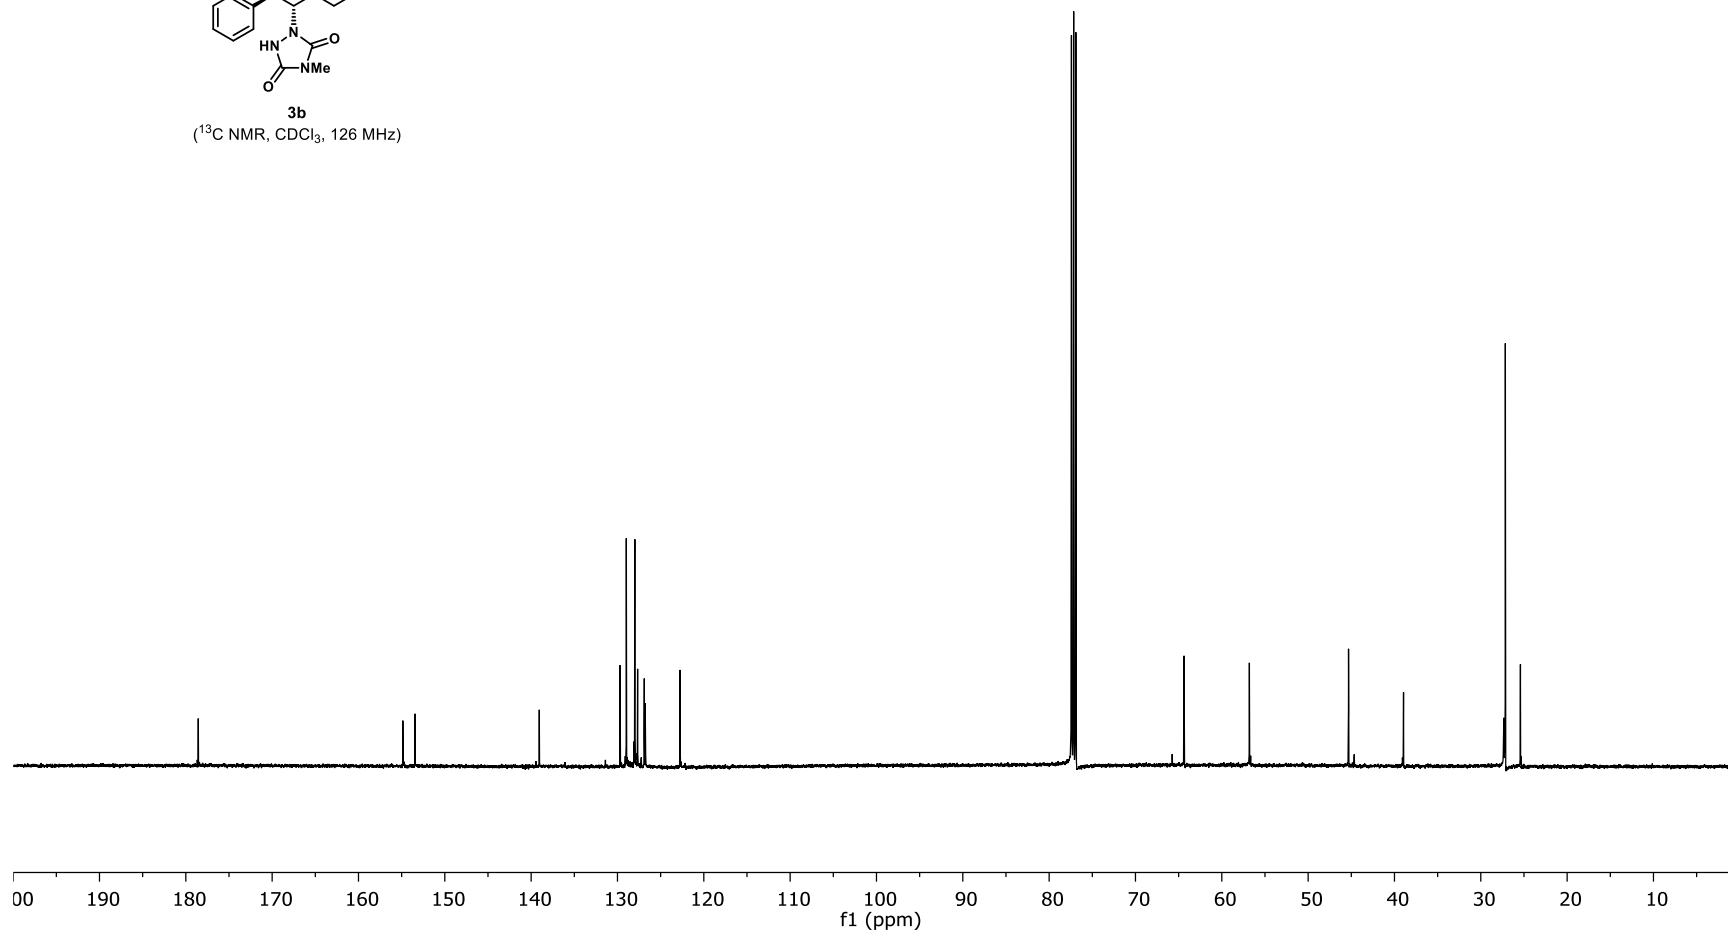

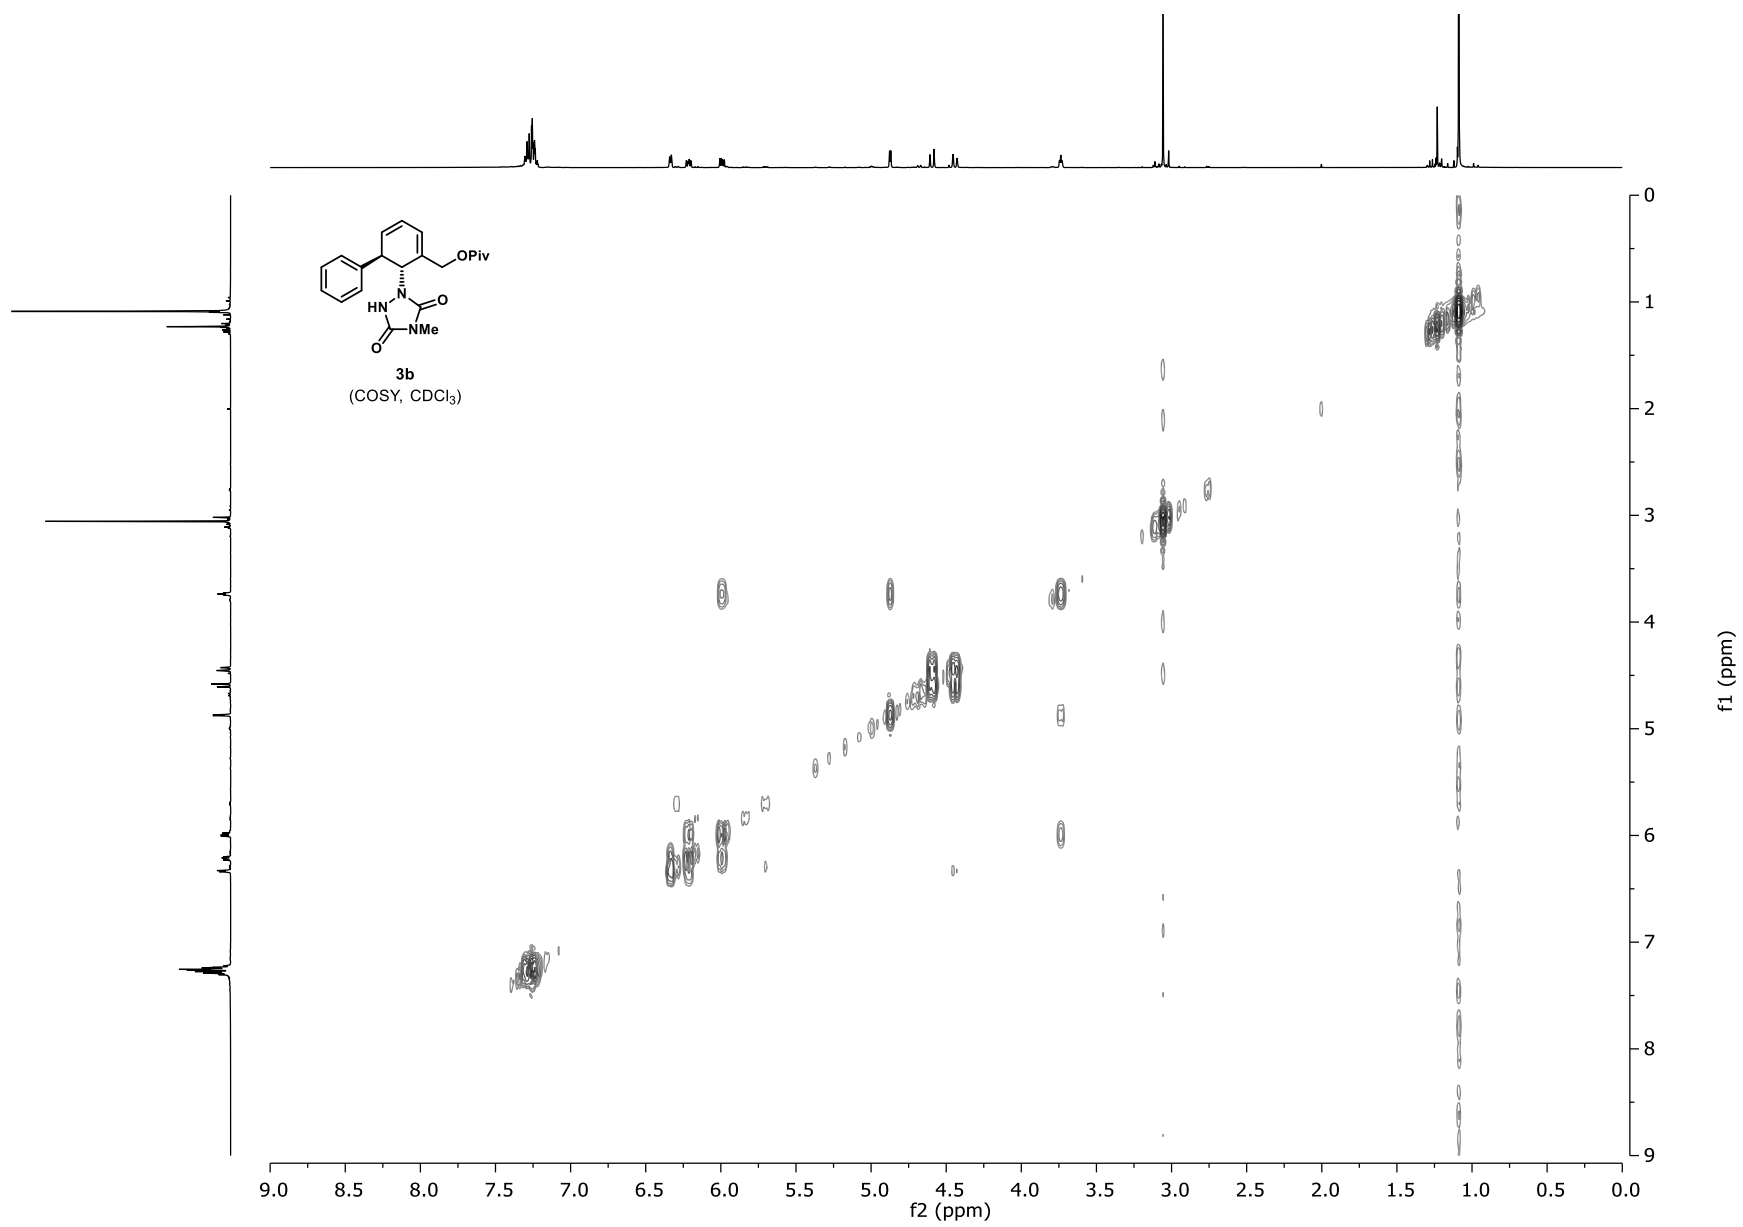



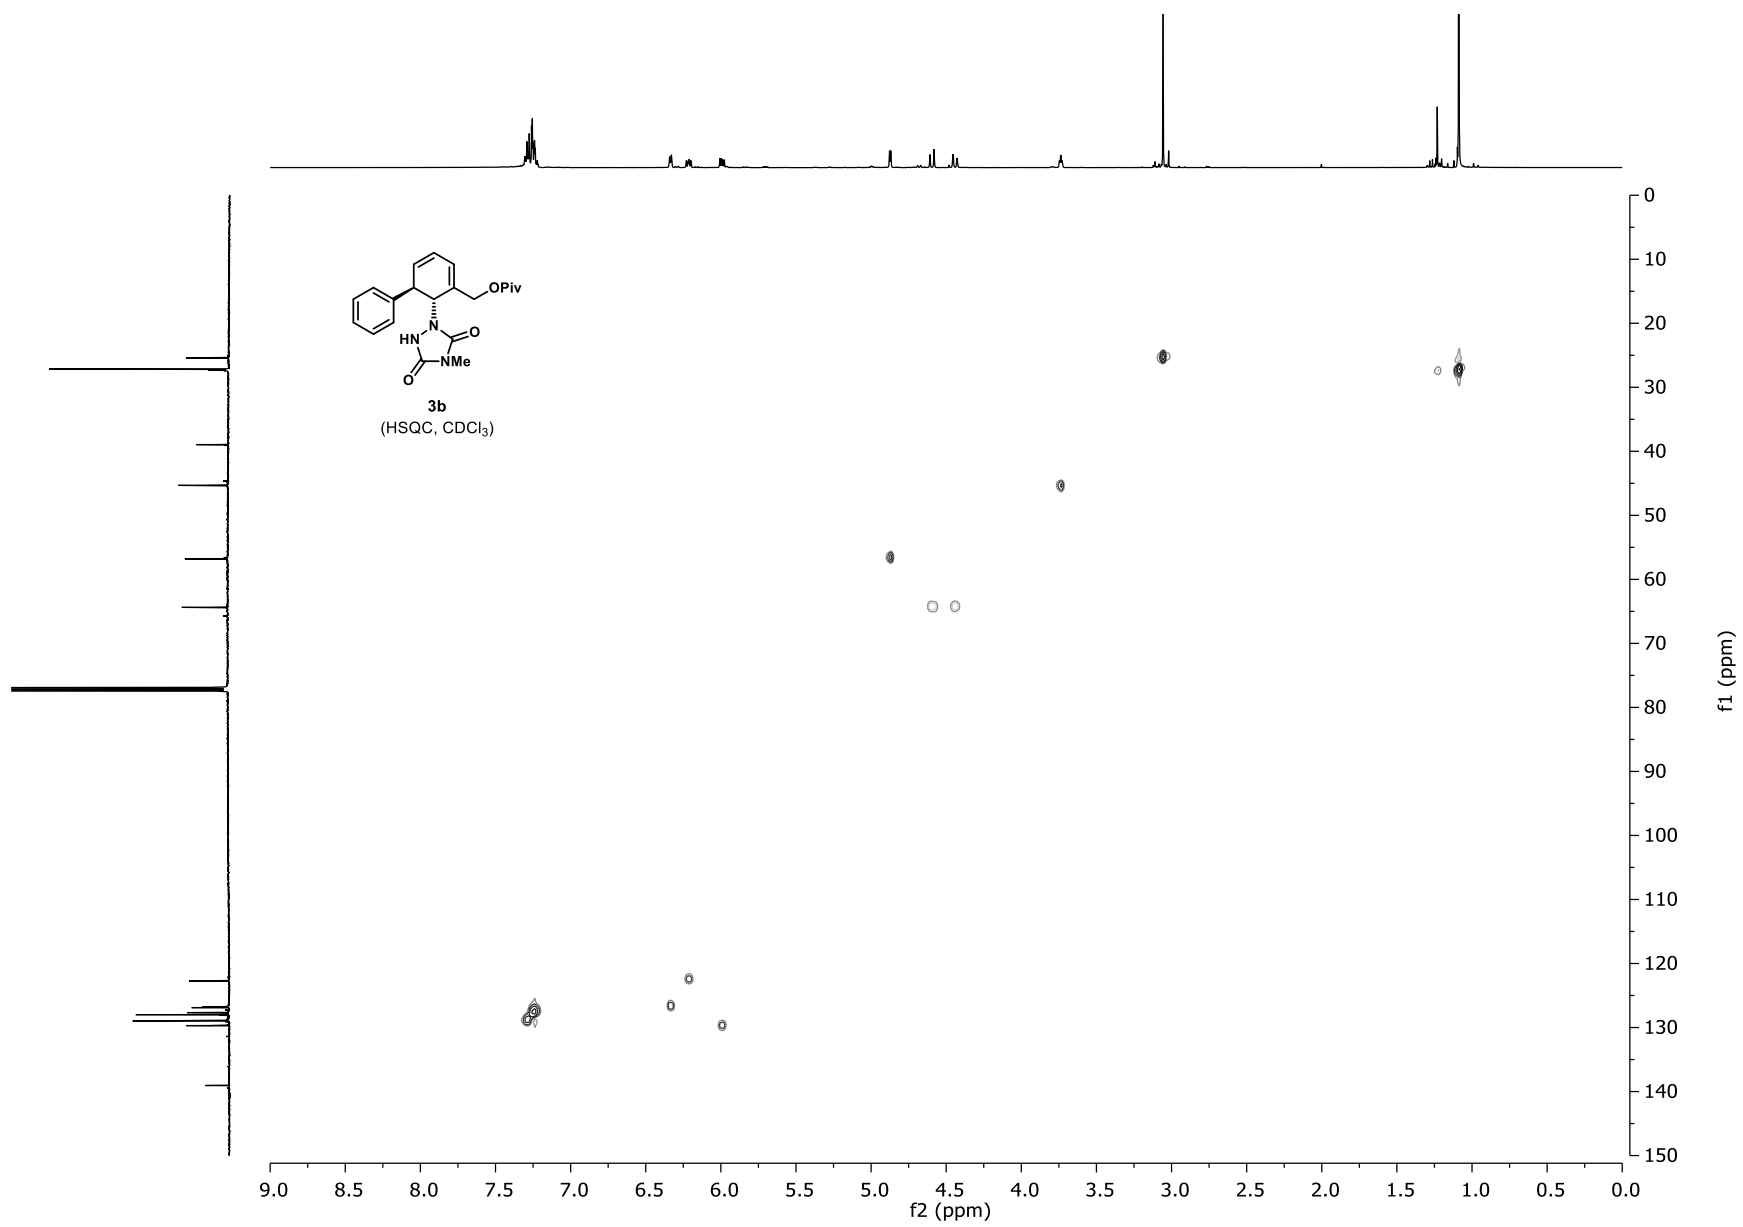

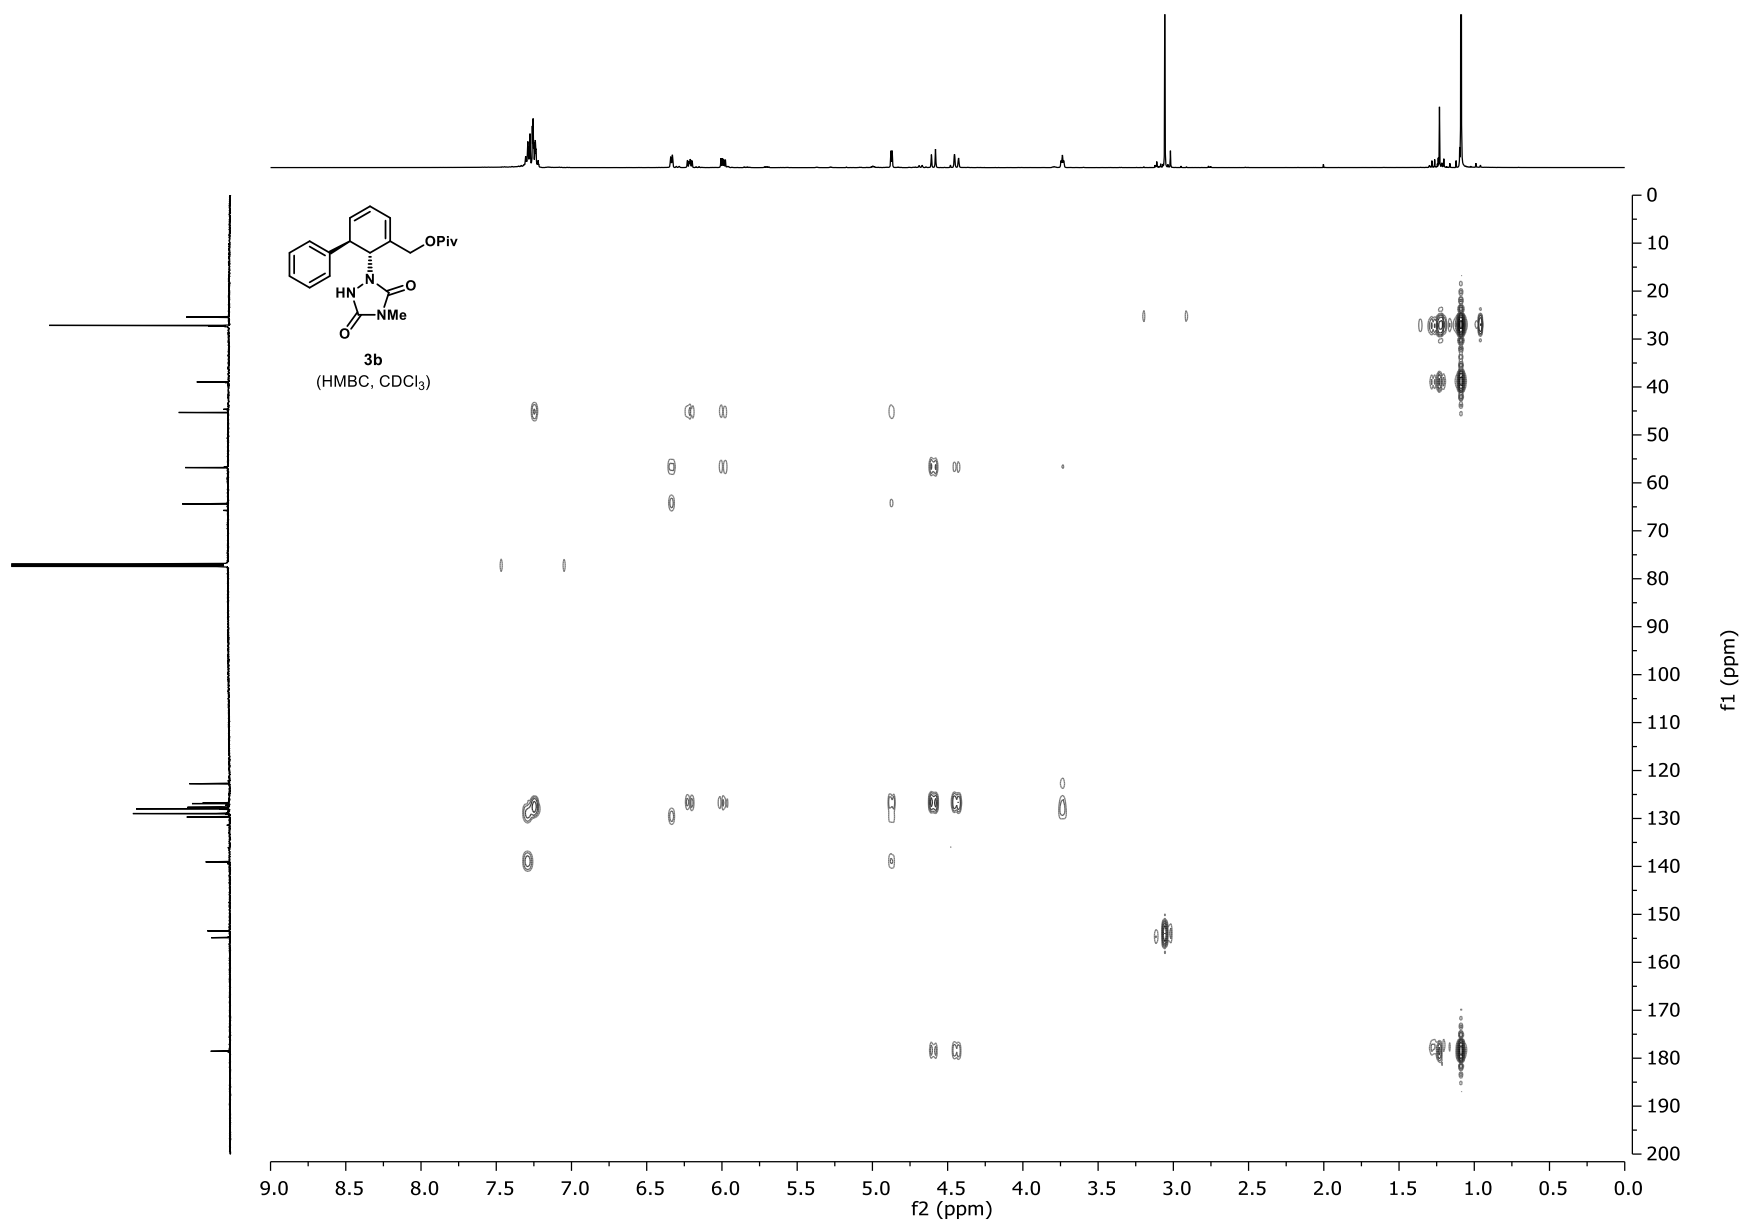

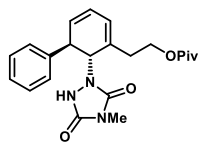

**3c**  
(<sup>1</sup>H NMR, CDCl<sub>3</sub>, 500 MHz)

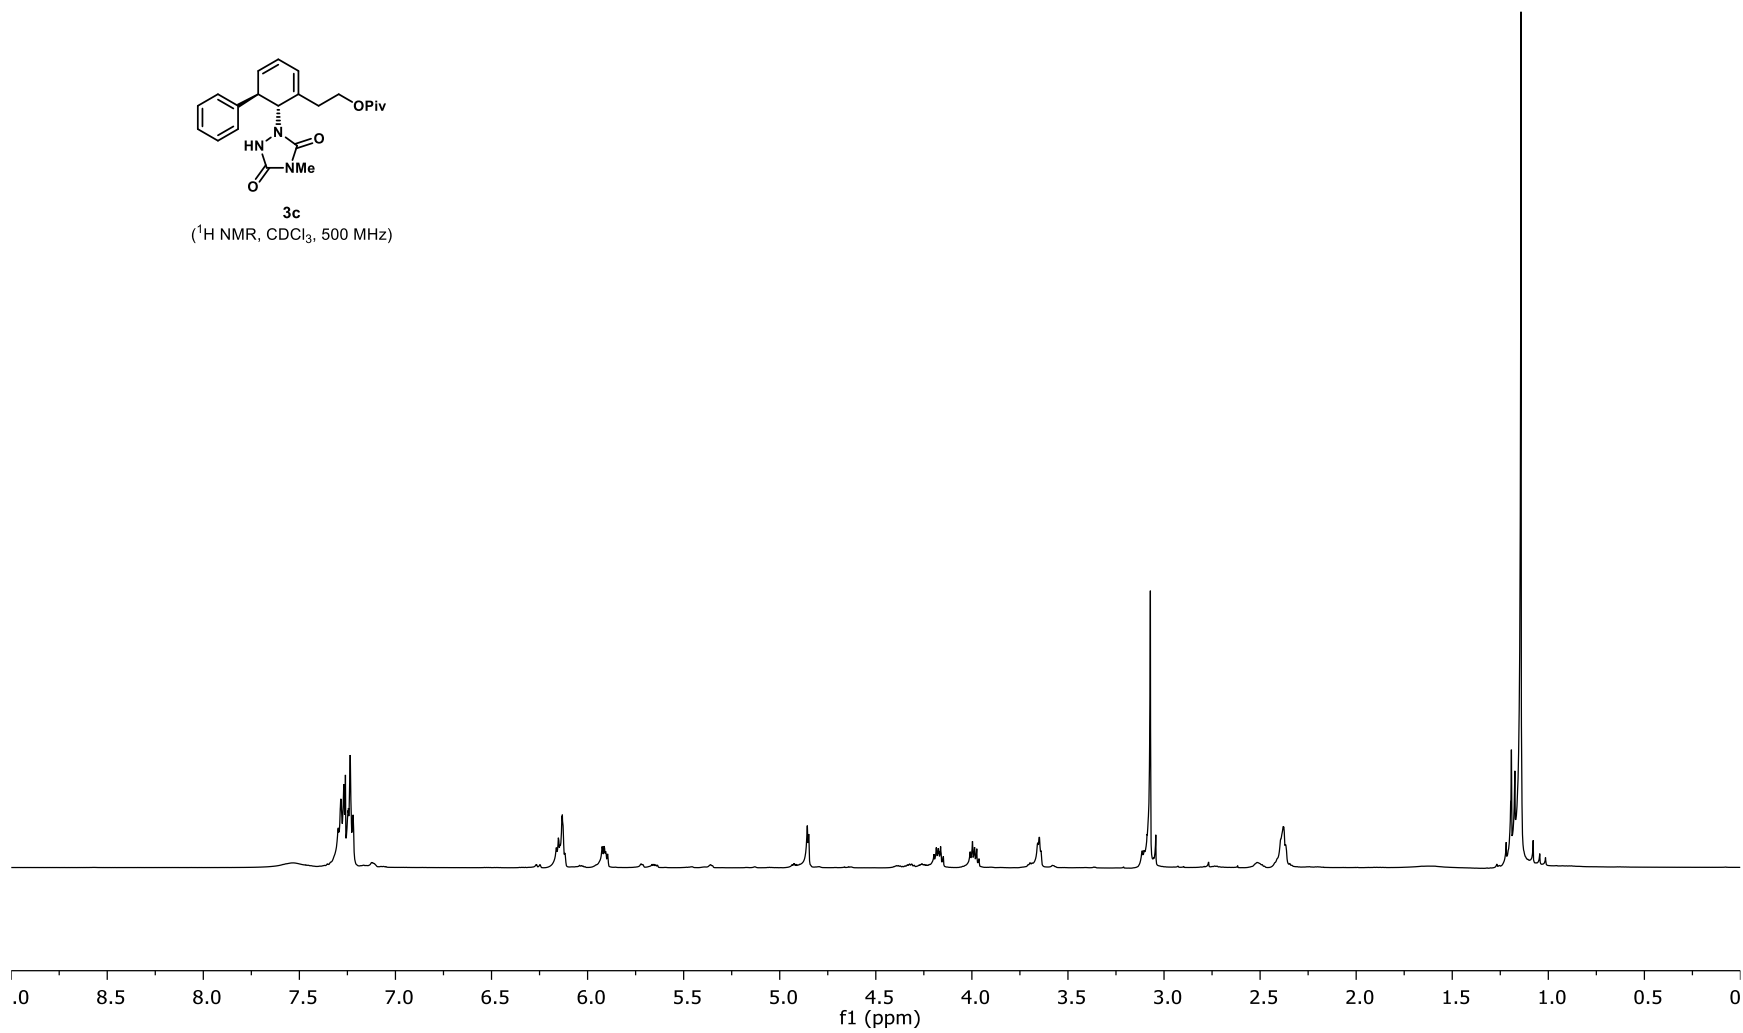

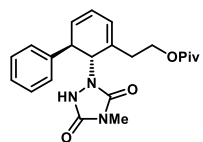

**3c**  
(<sup>13</sup>C NMR, CDCl<sub>3</sub>, 126 MHz)

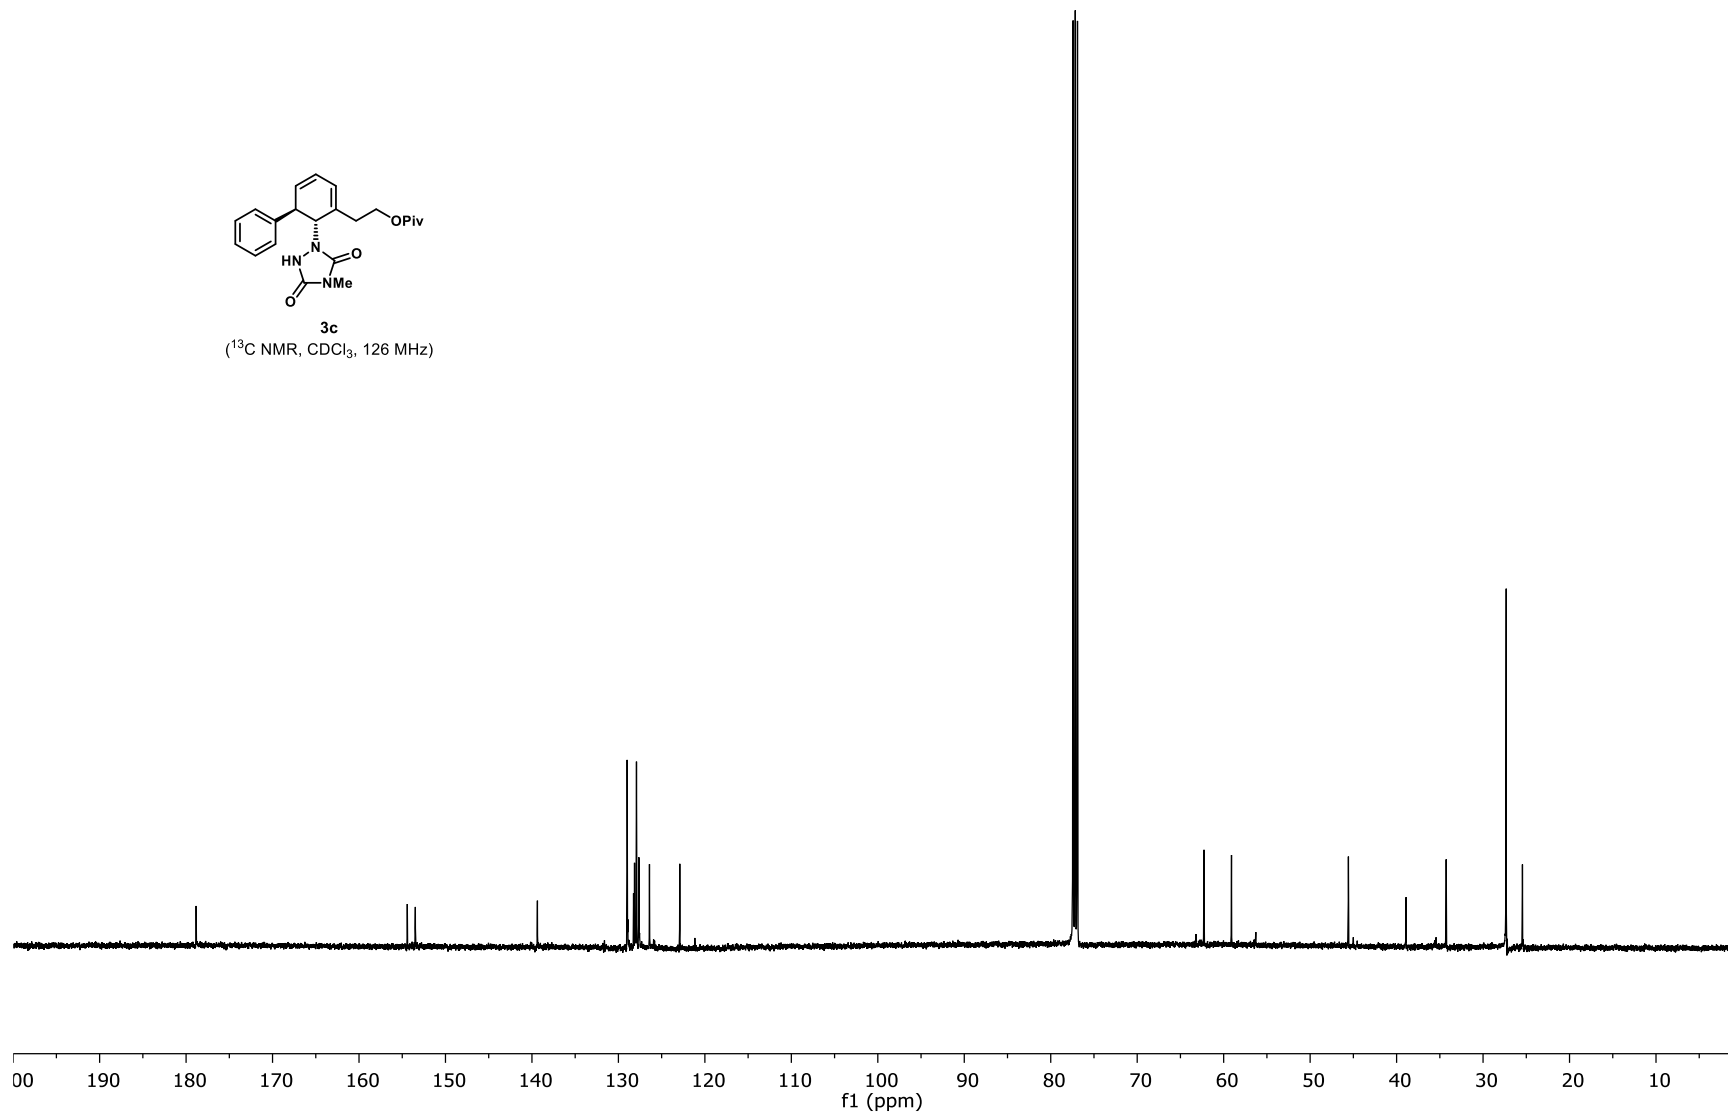

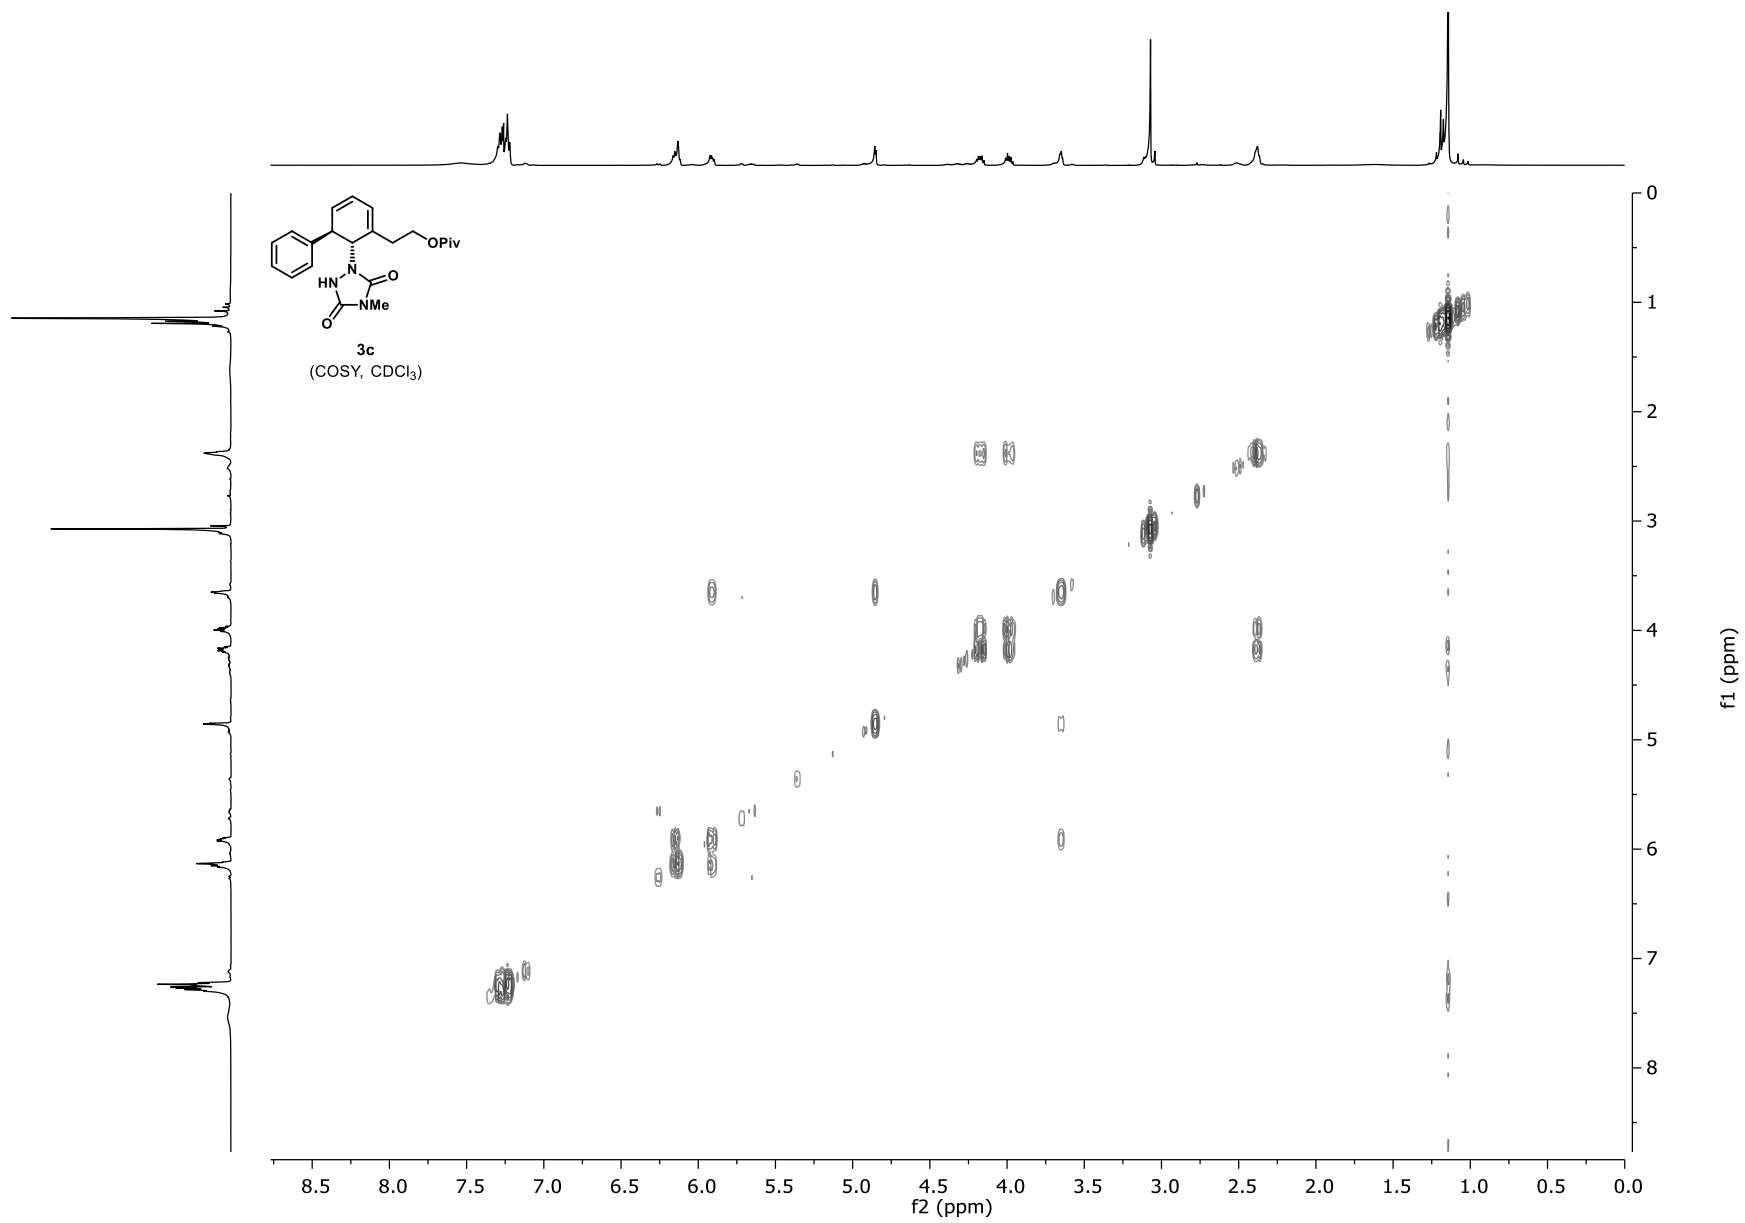

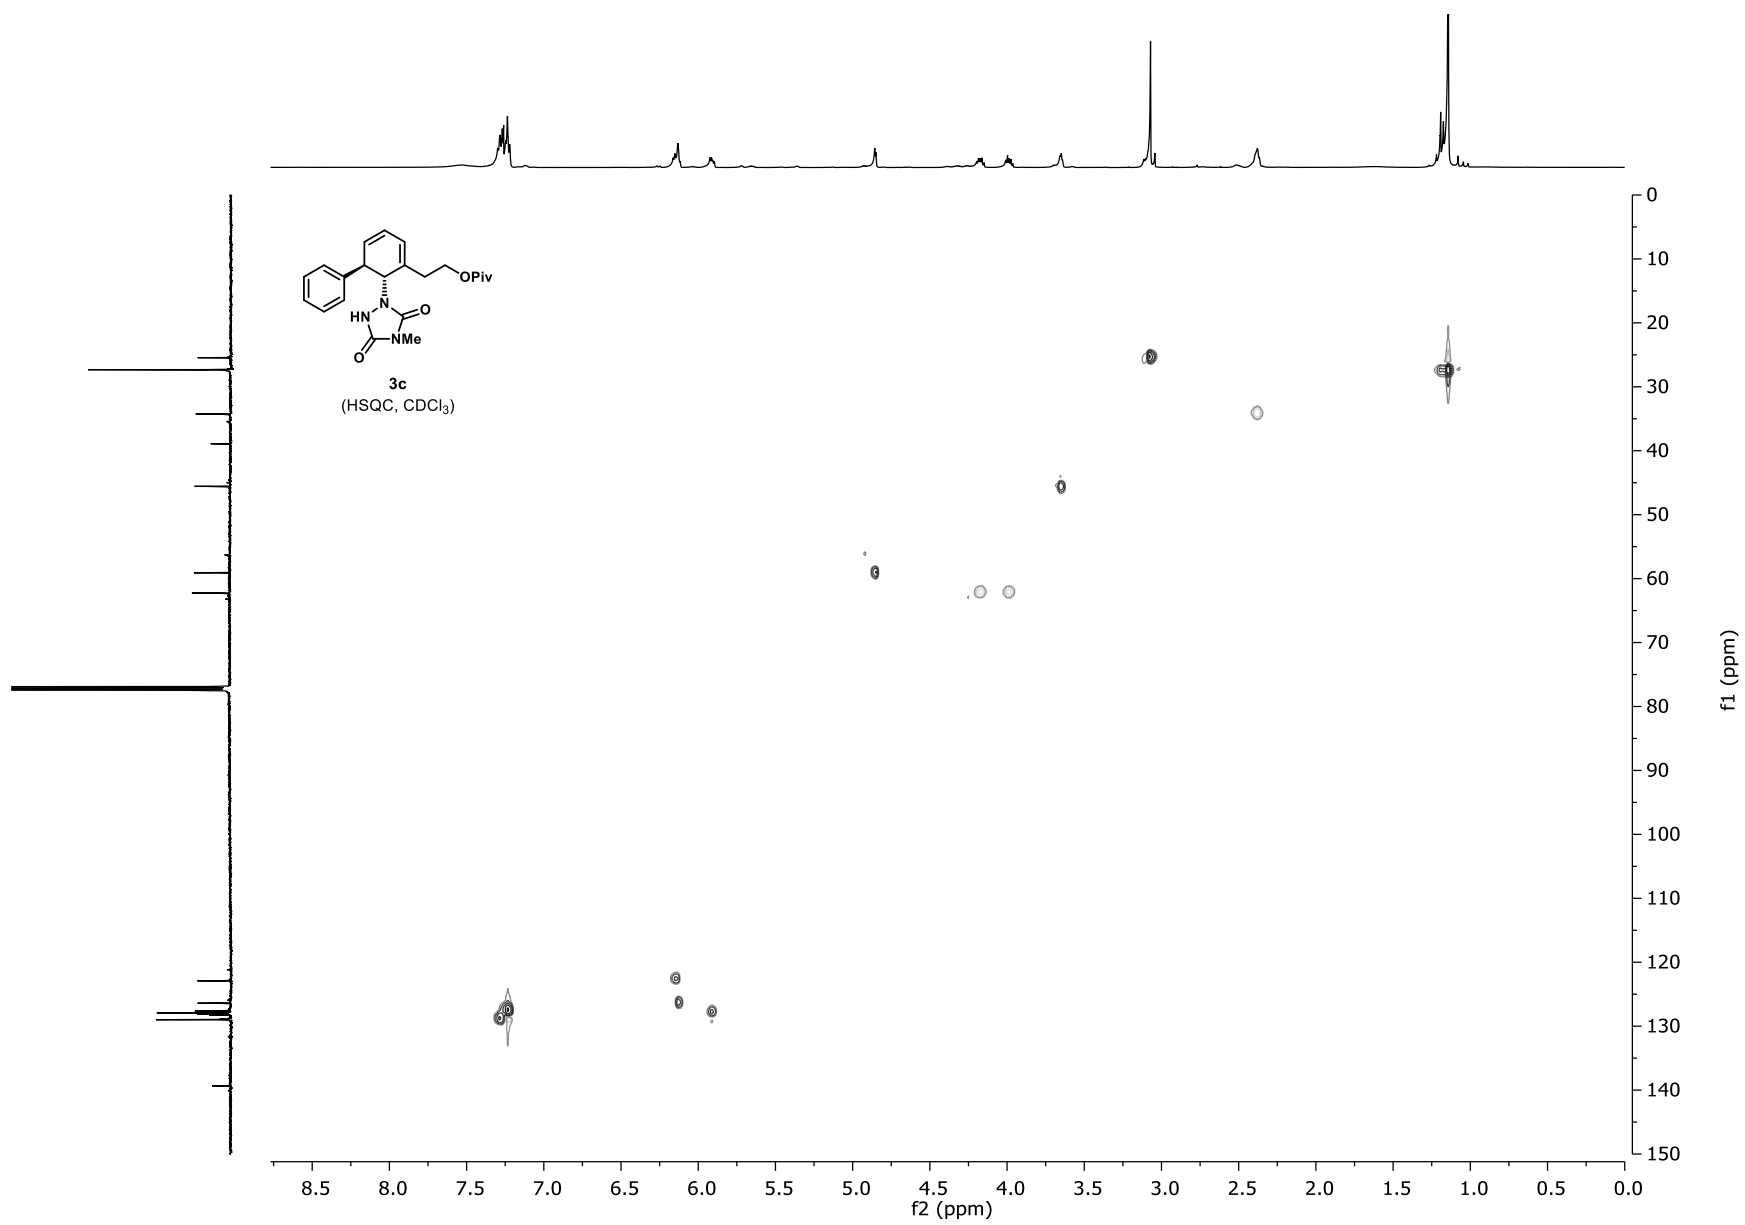

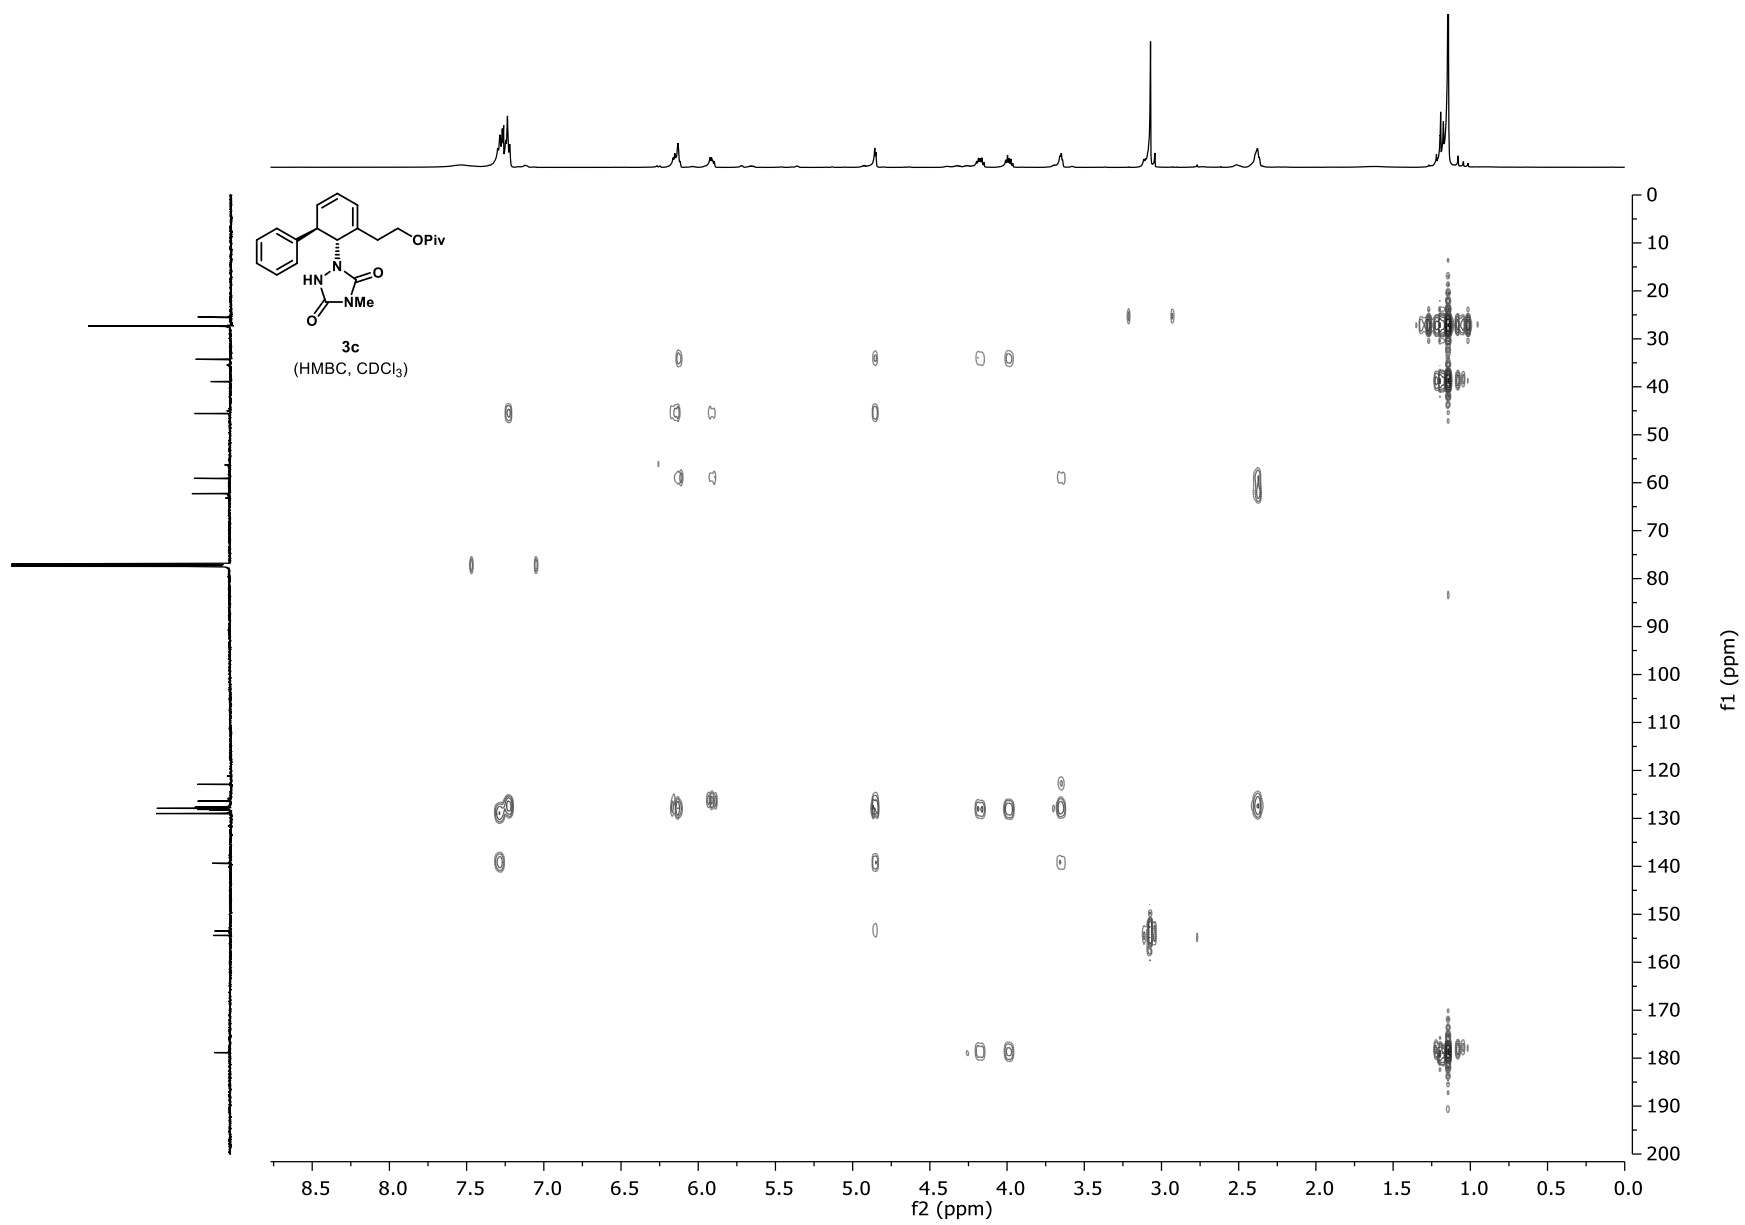

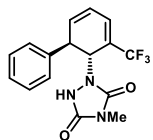

**3d**  
(<sup>1</sup>H NMR, CDCl<sub>3</sub>, 500 MHz)

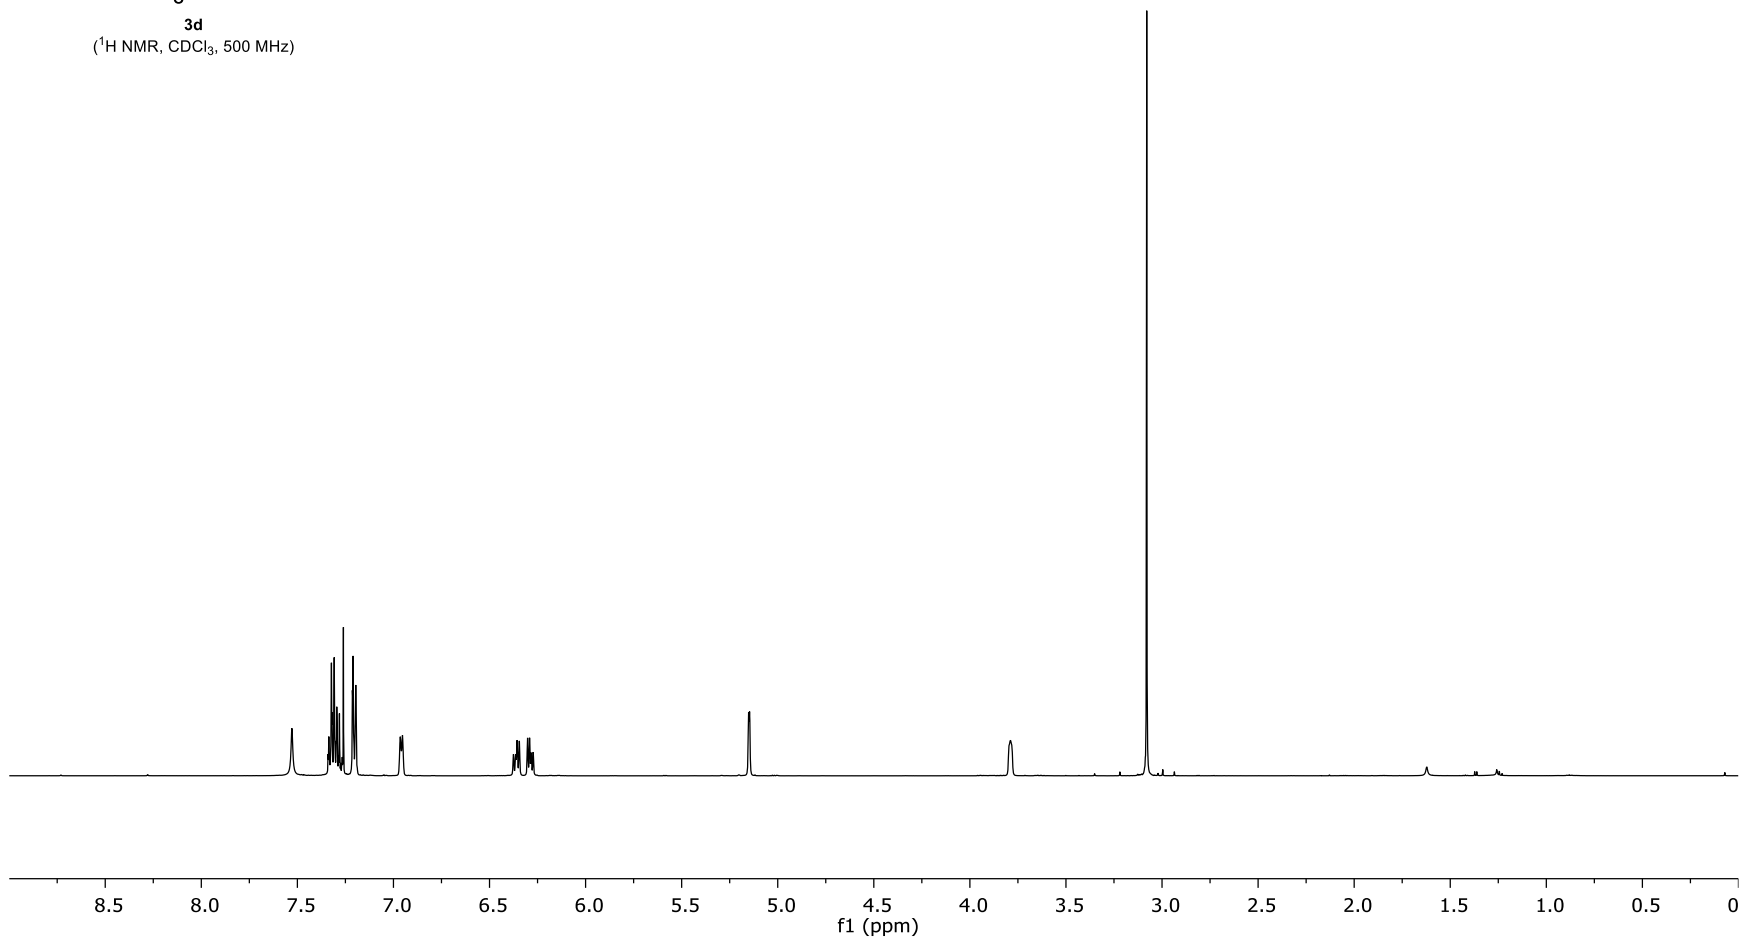



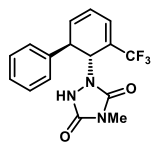

**3d**  
(<sup>13</sup>C NMR, CDCl<sub>3</sub>, 126 MHz)

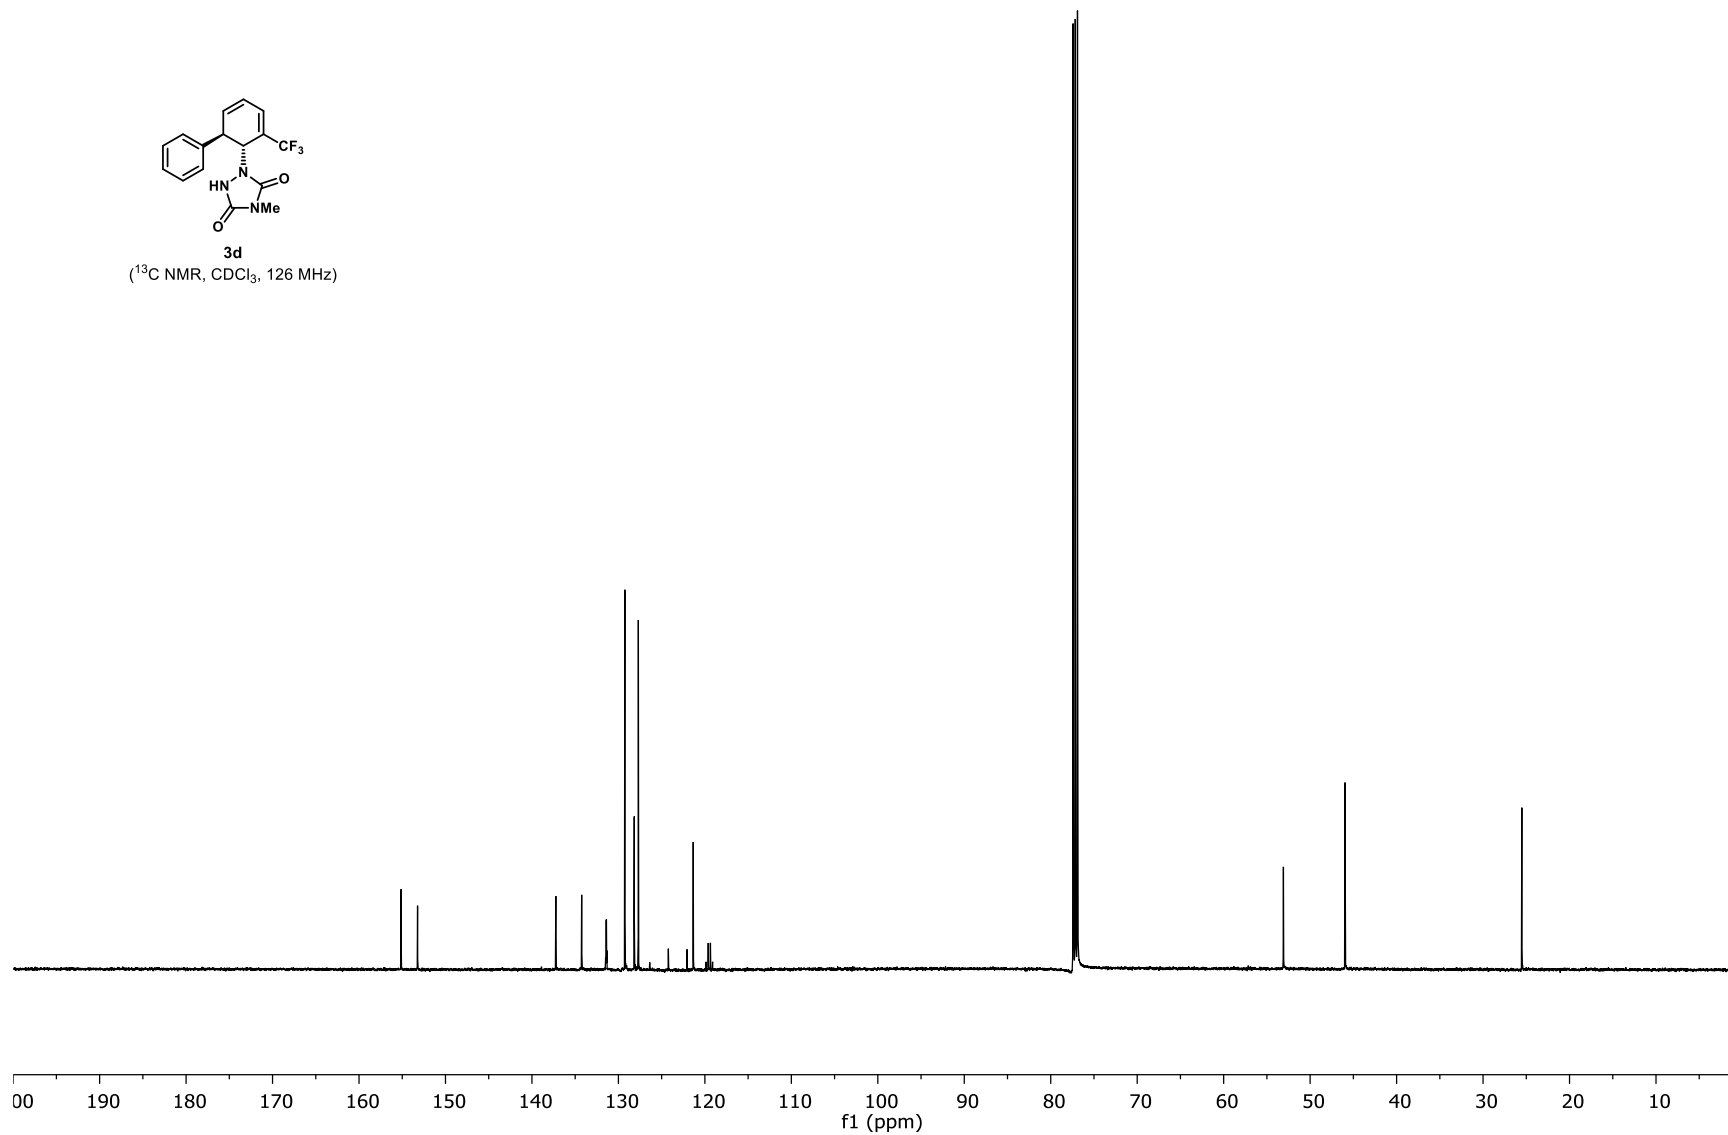

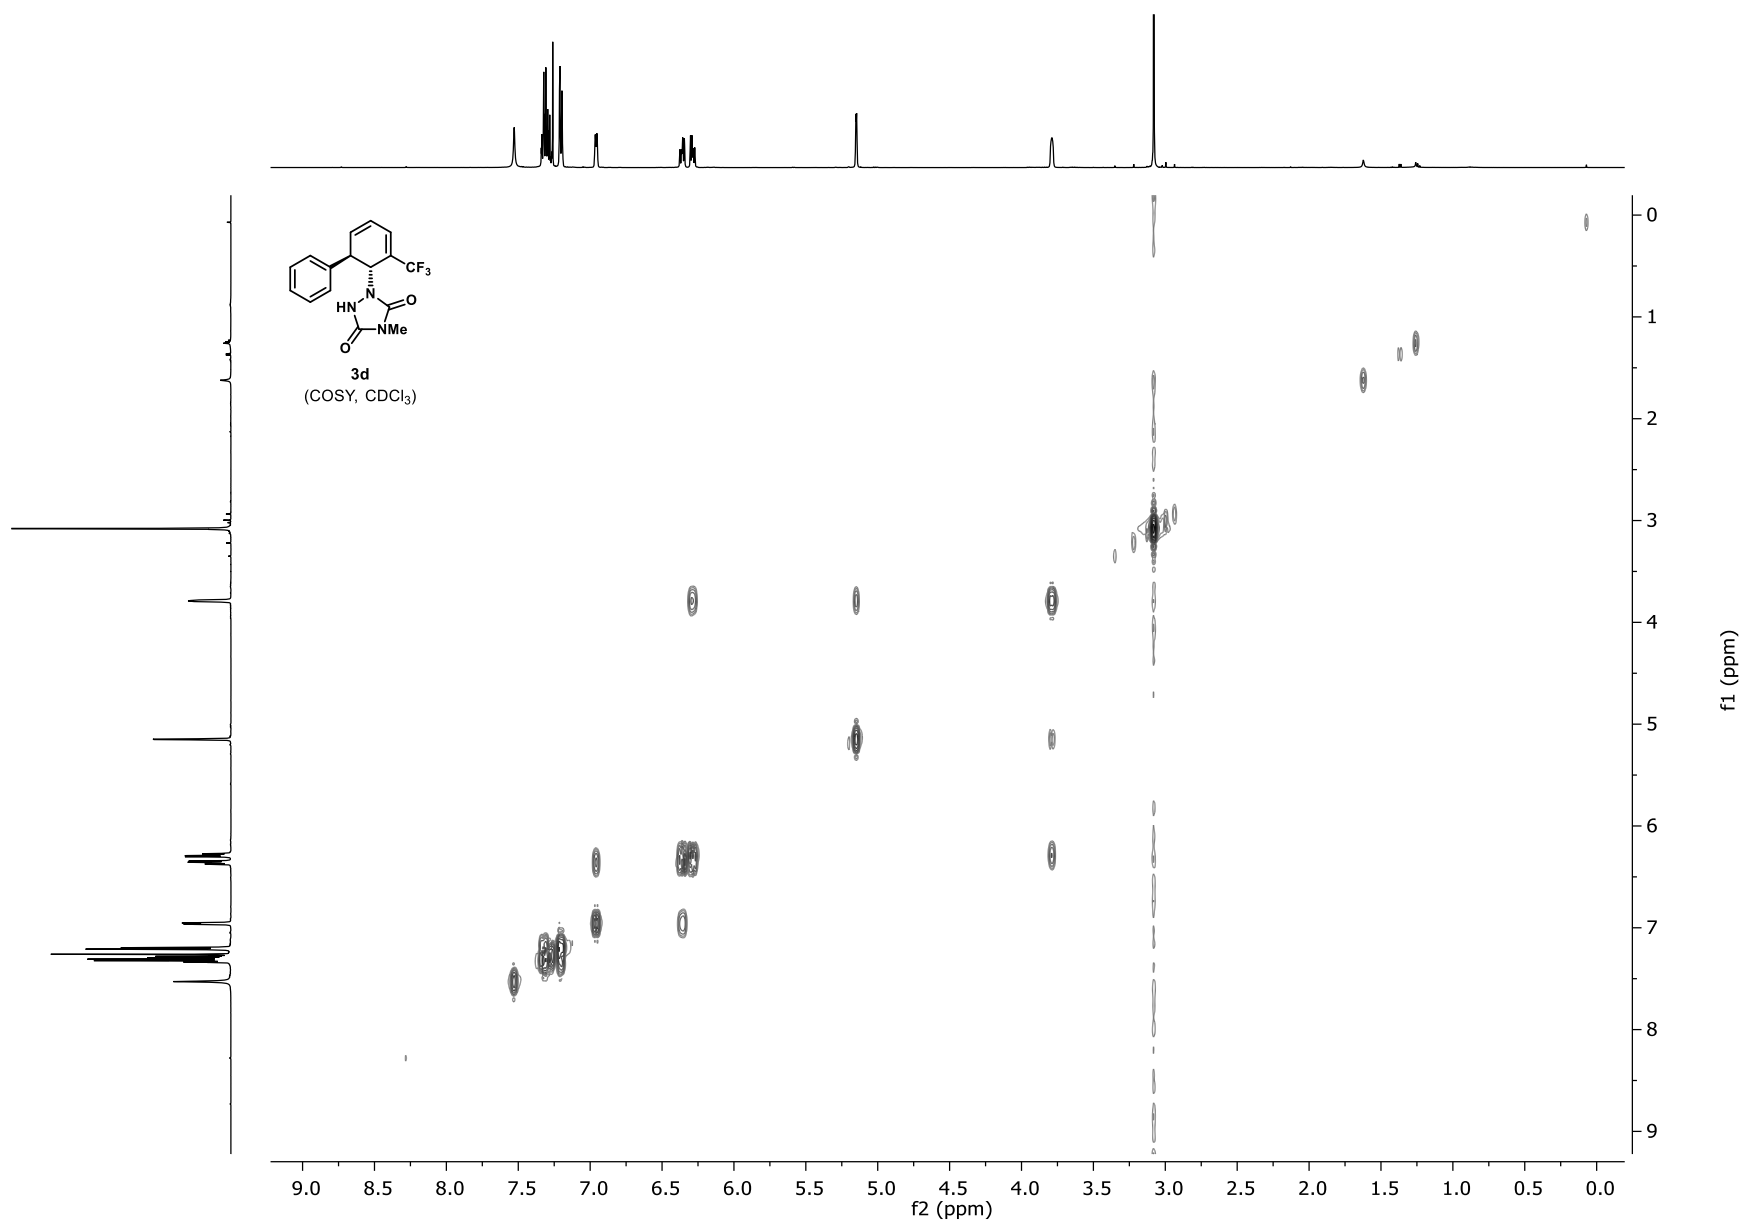

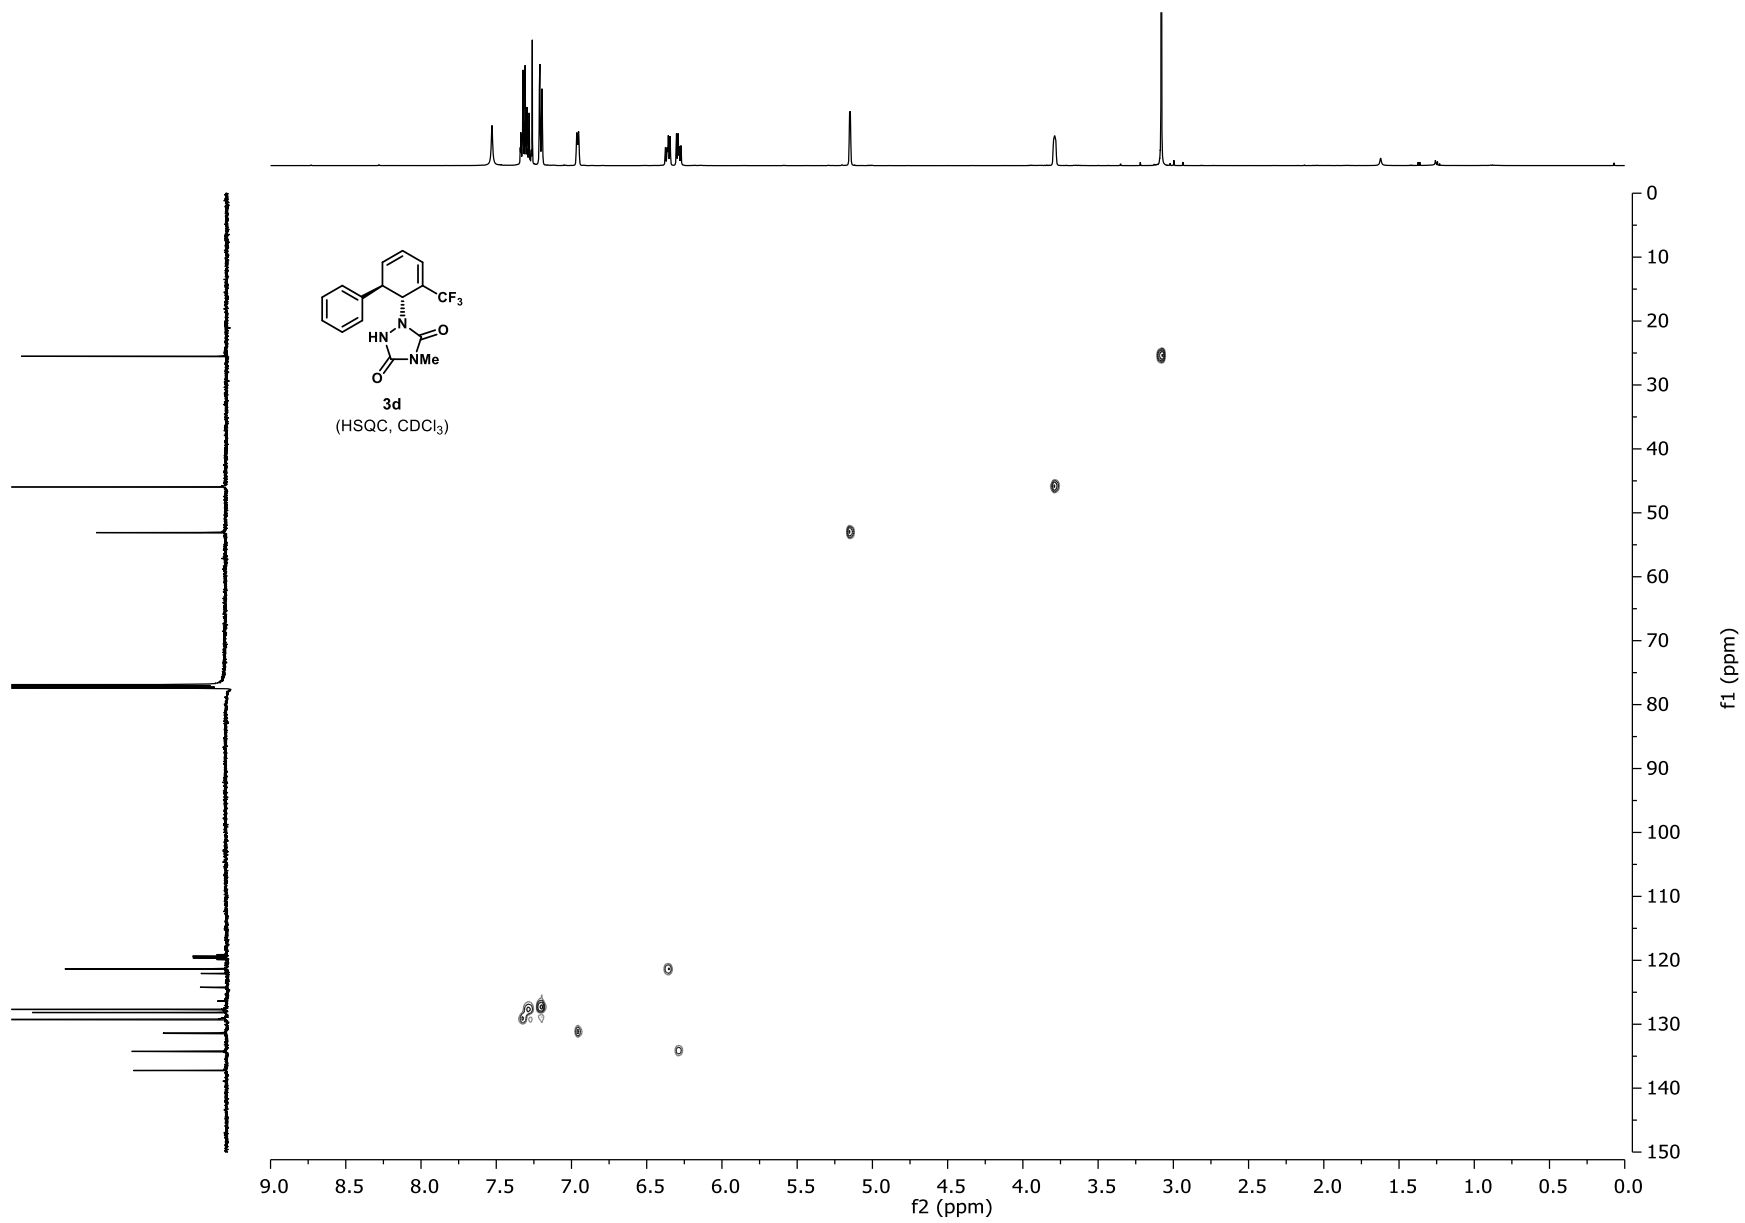

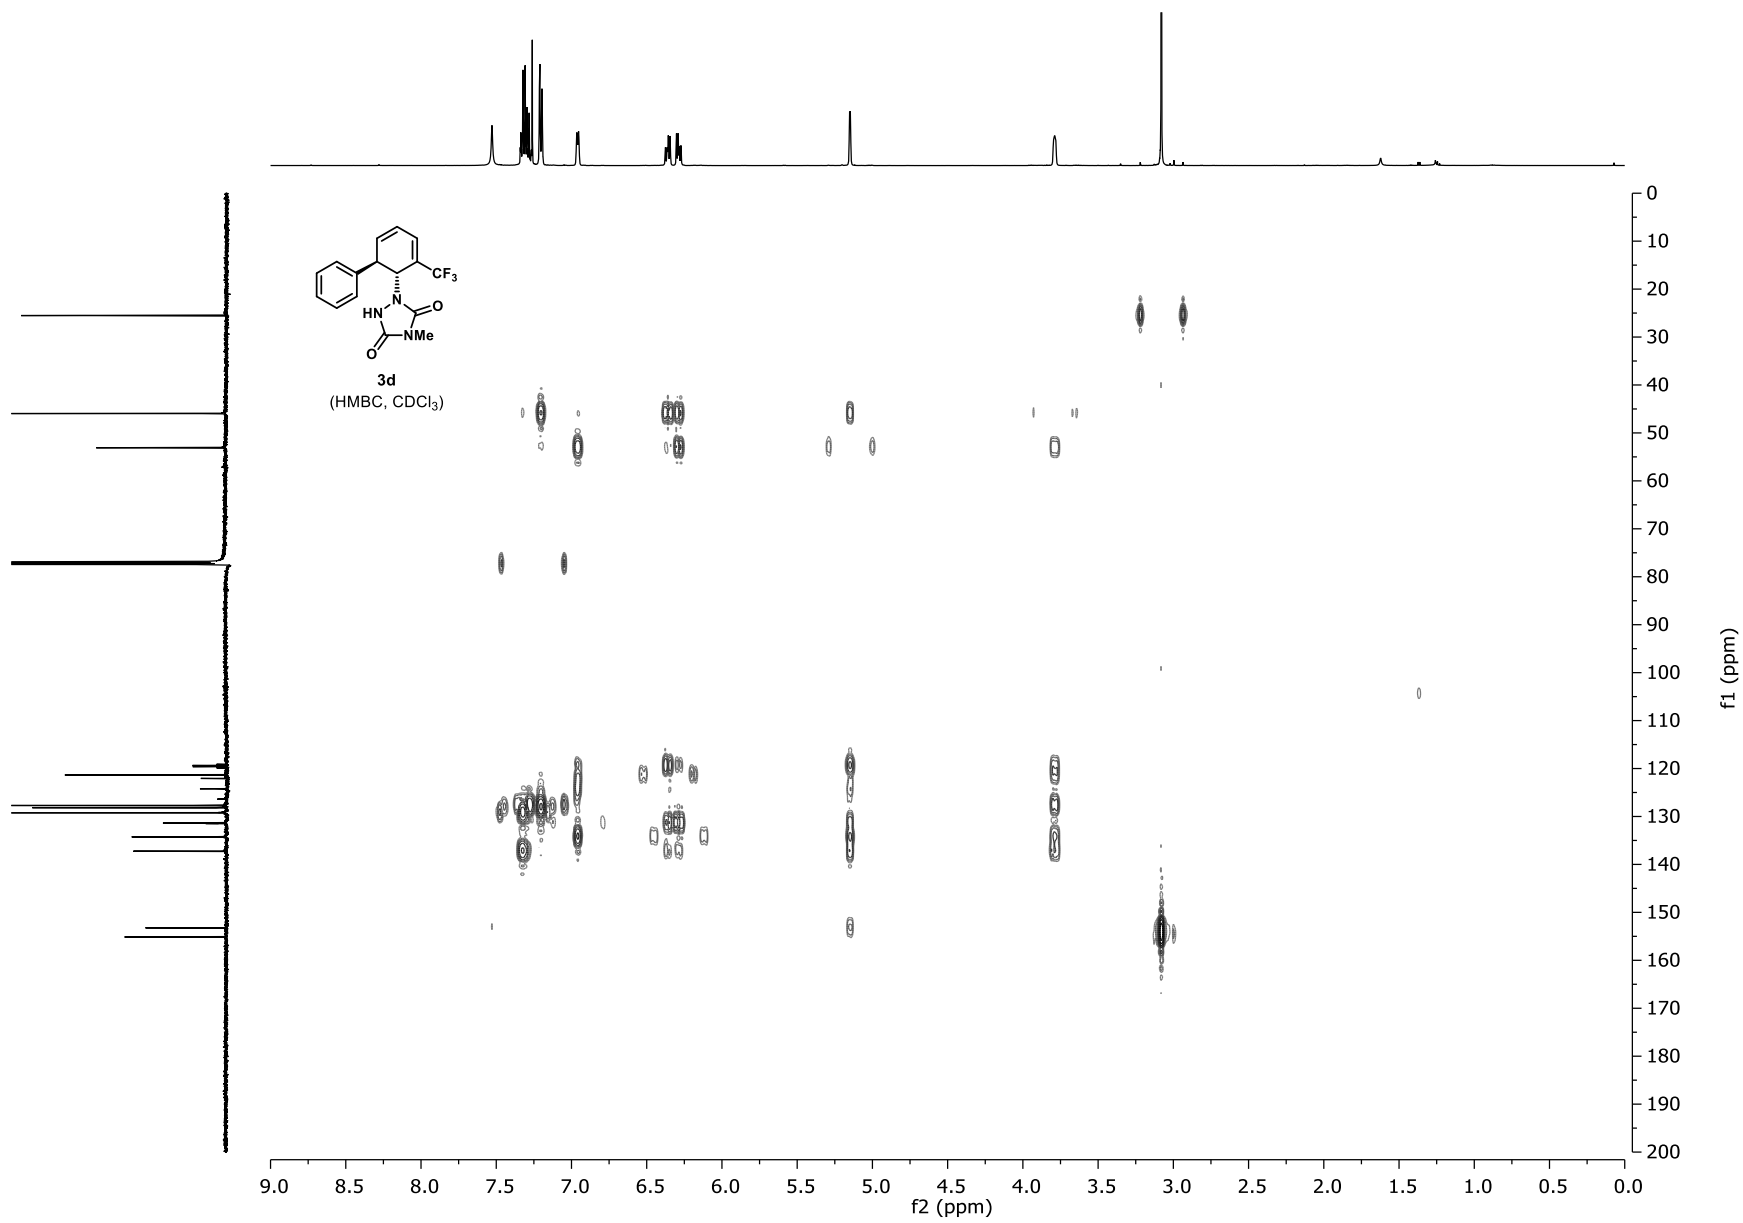

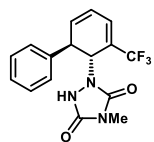

**3d**  
(<sup>19</sup>F, CDCl<sub>3</sub>, 471 MHz)

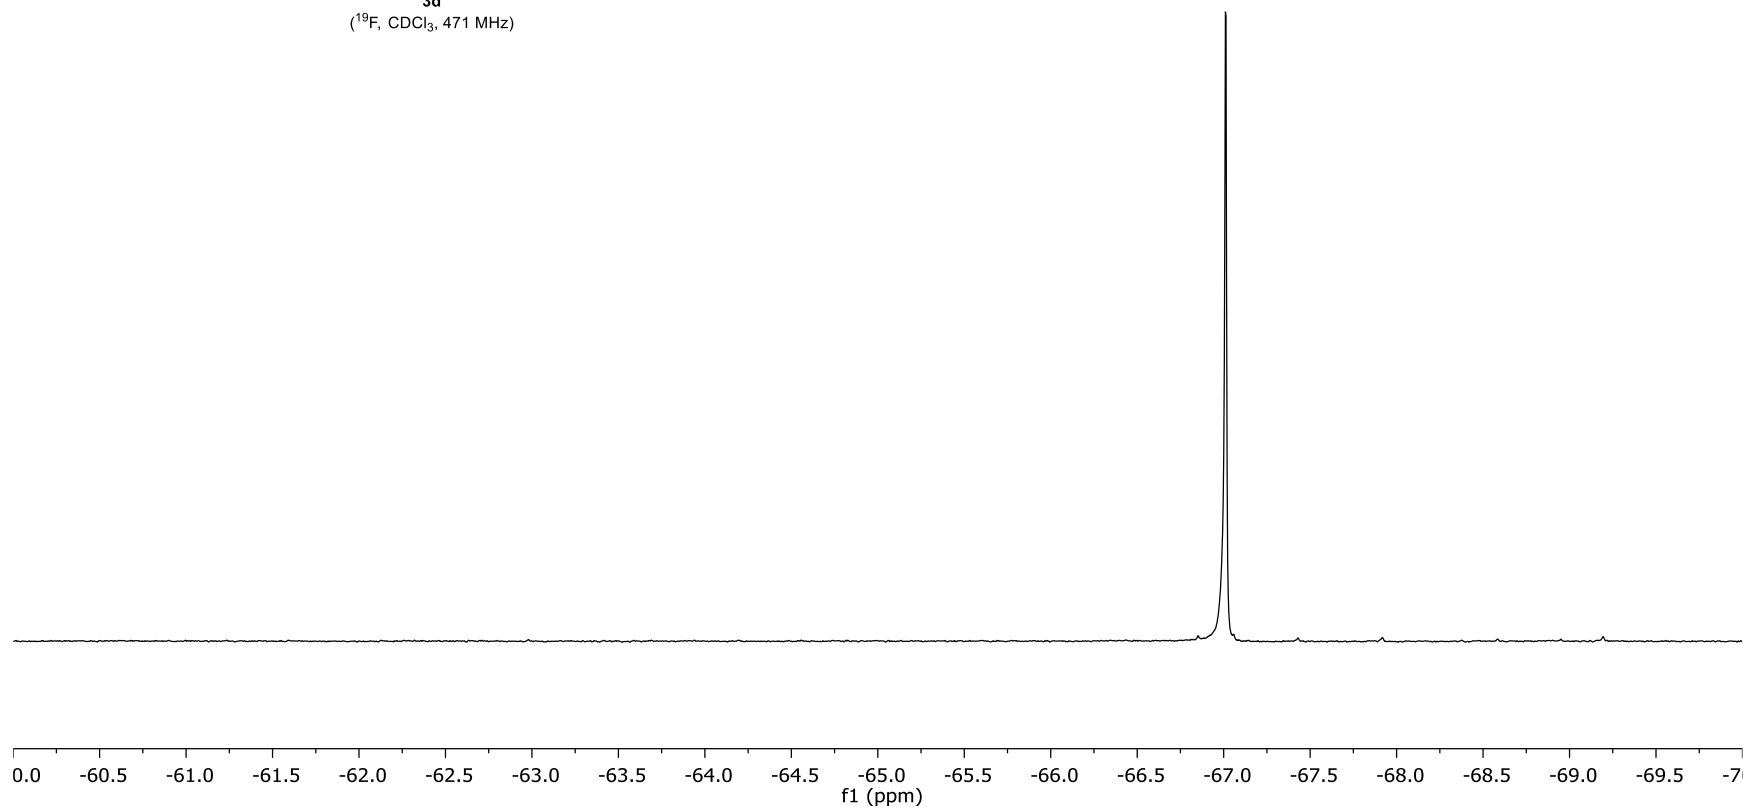

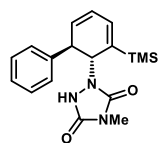

3e  
(<sup>1</sup>H NMR, CDCl<sub>3</sub>, 500 MHz)

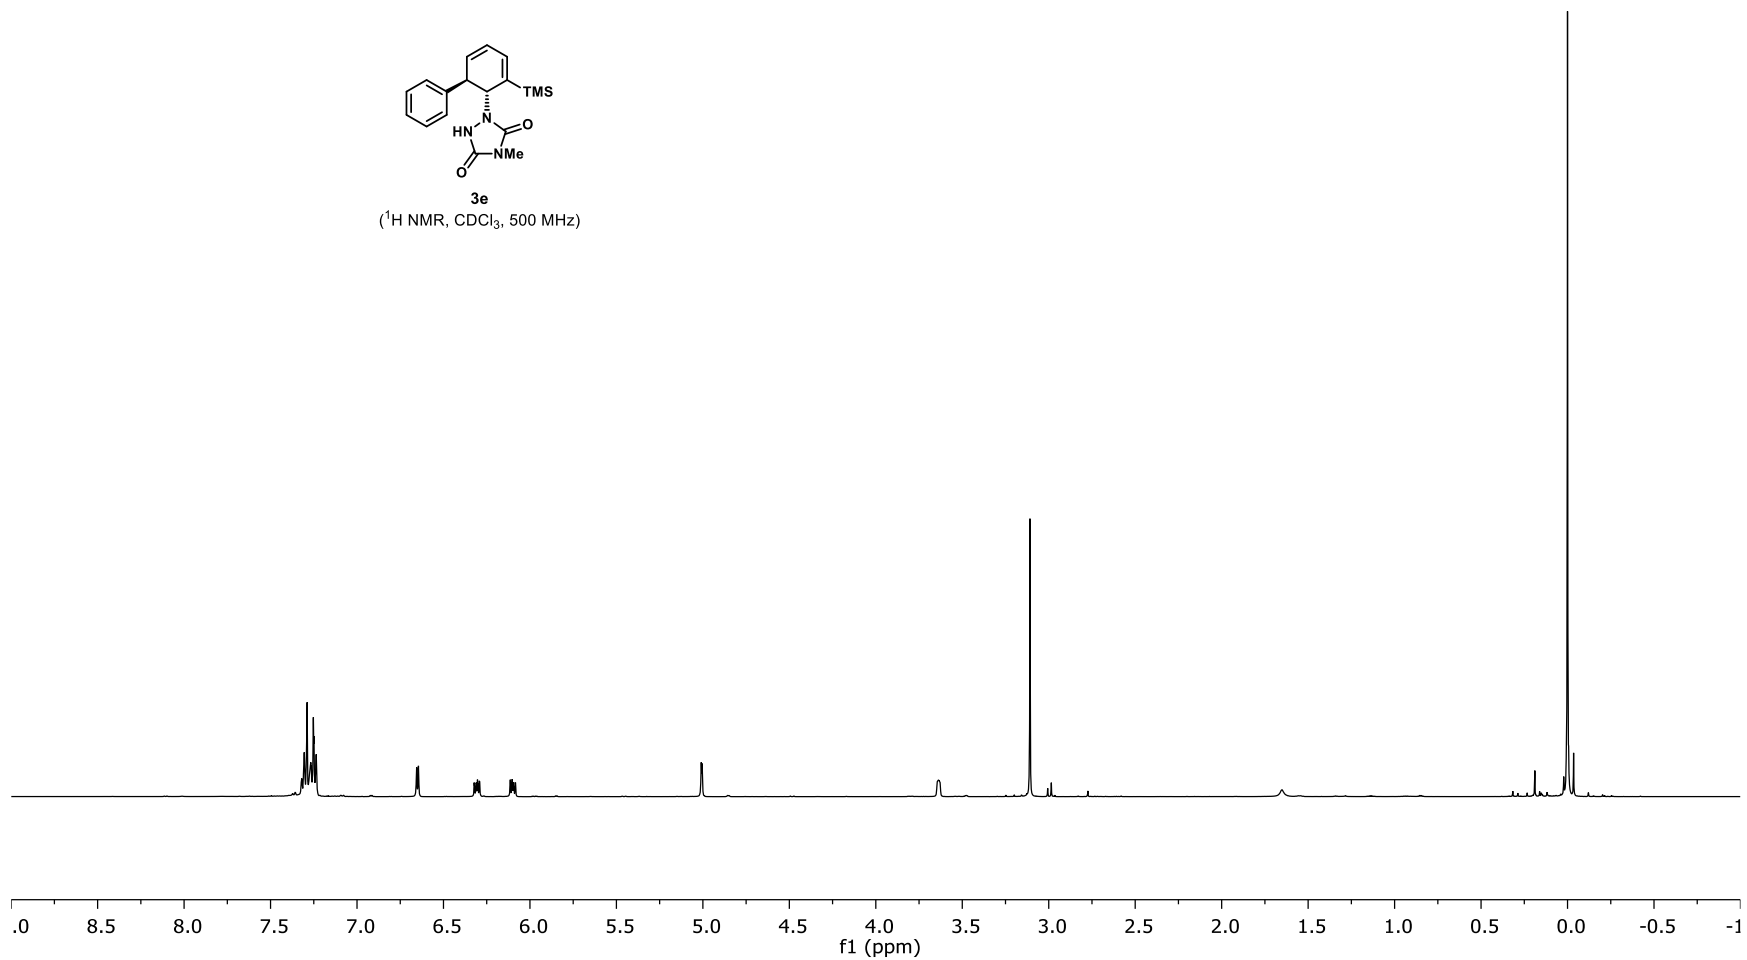

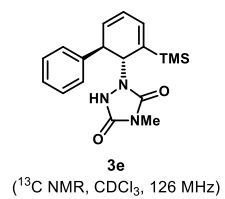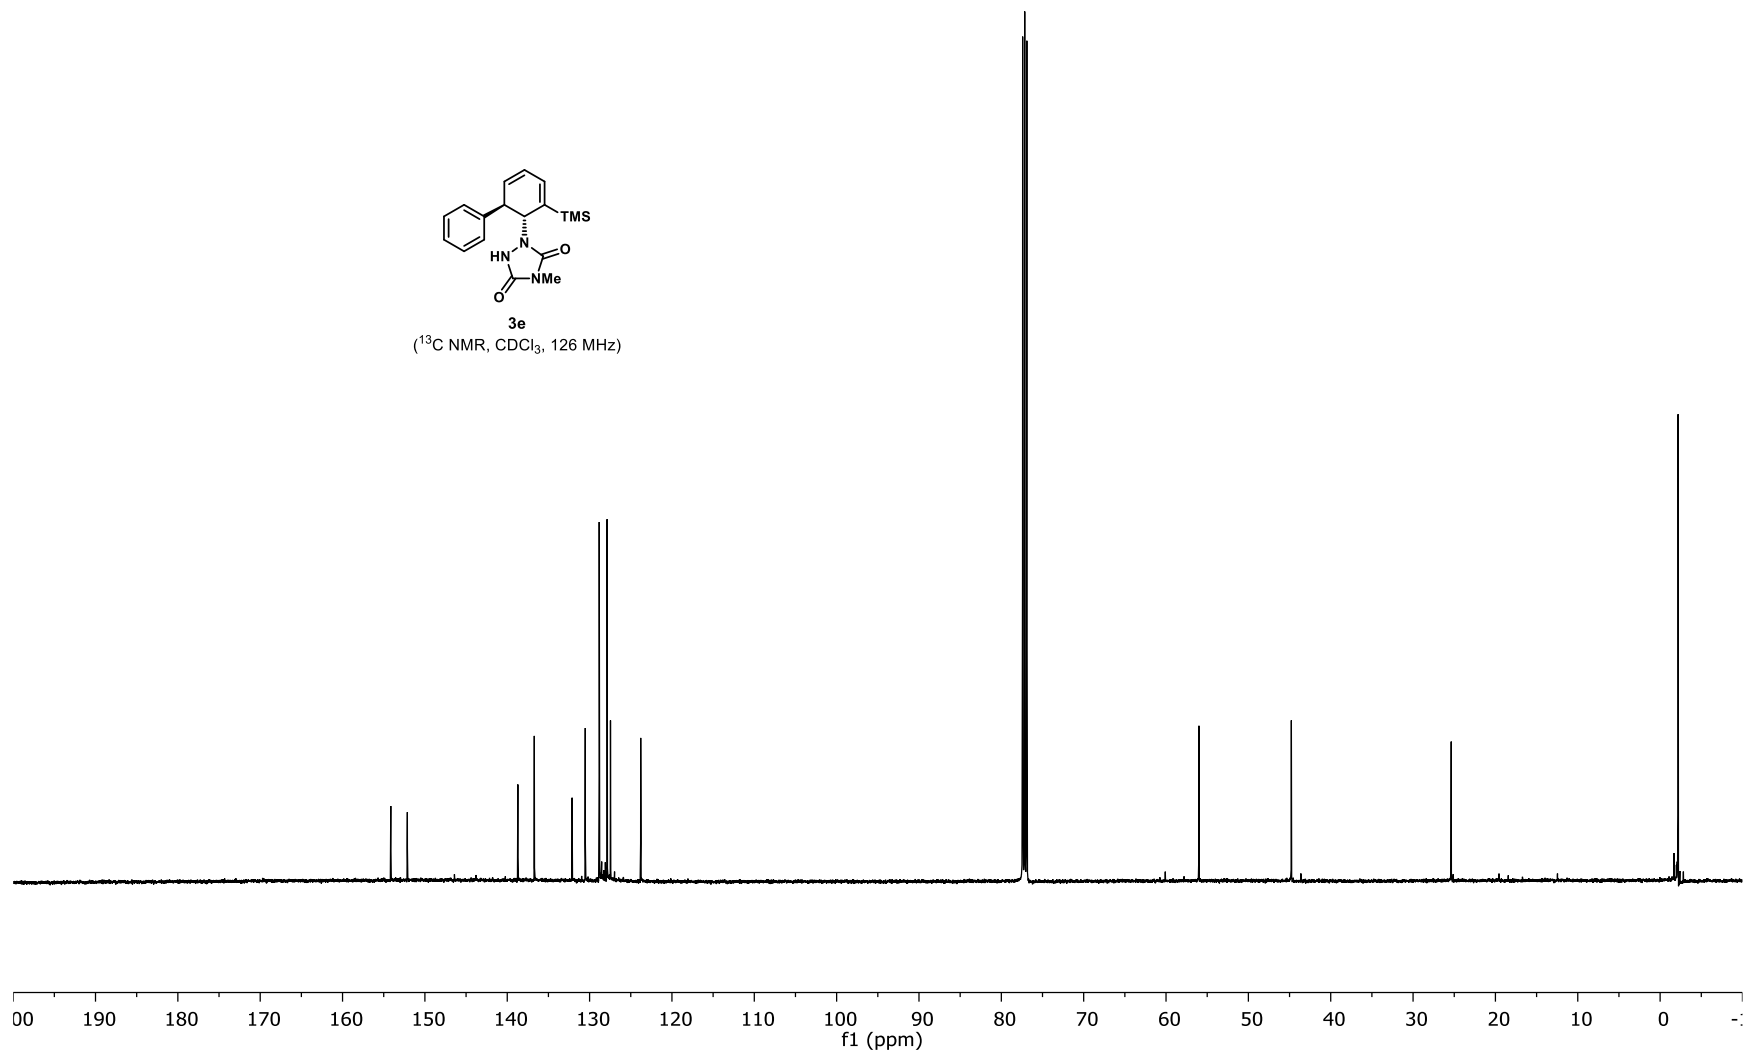

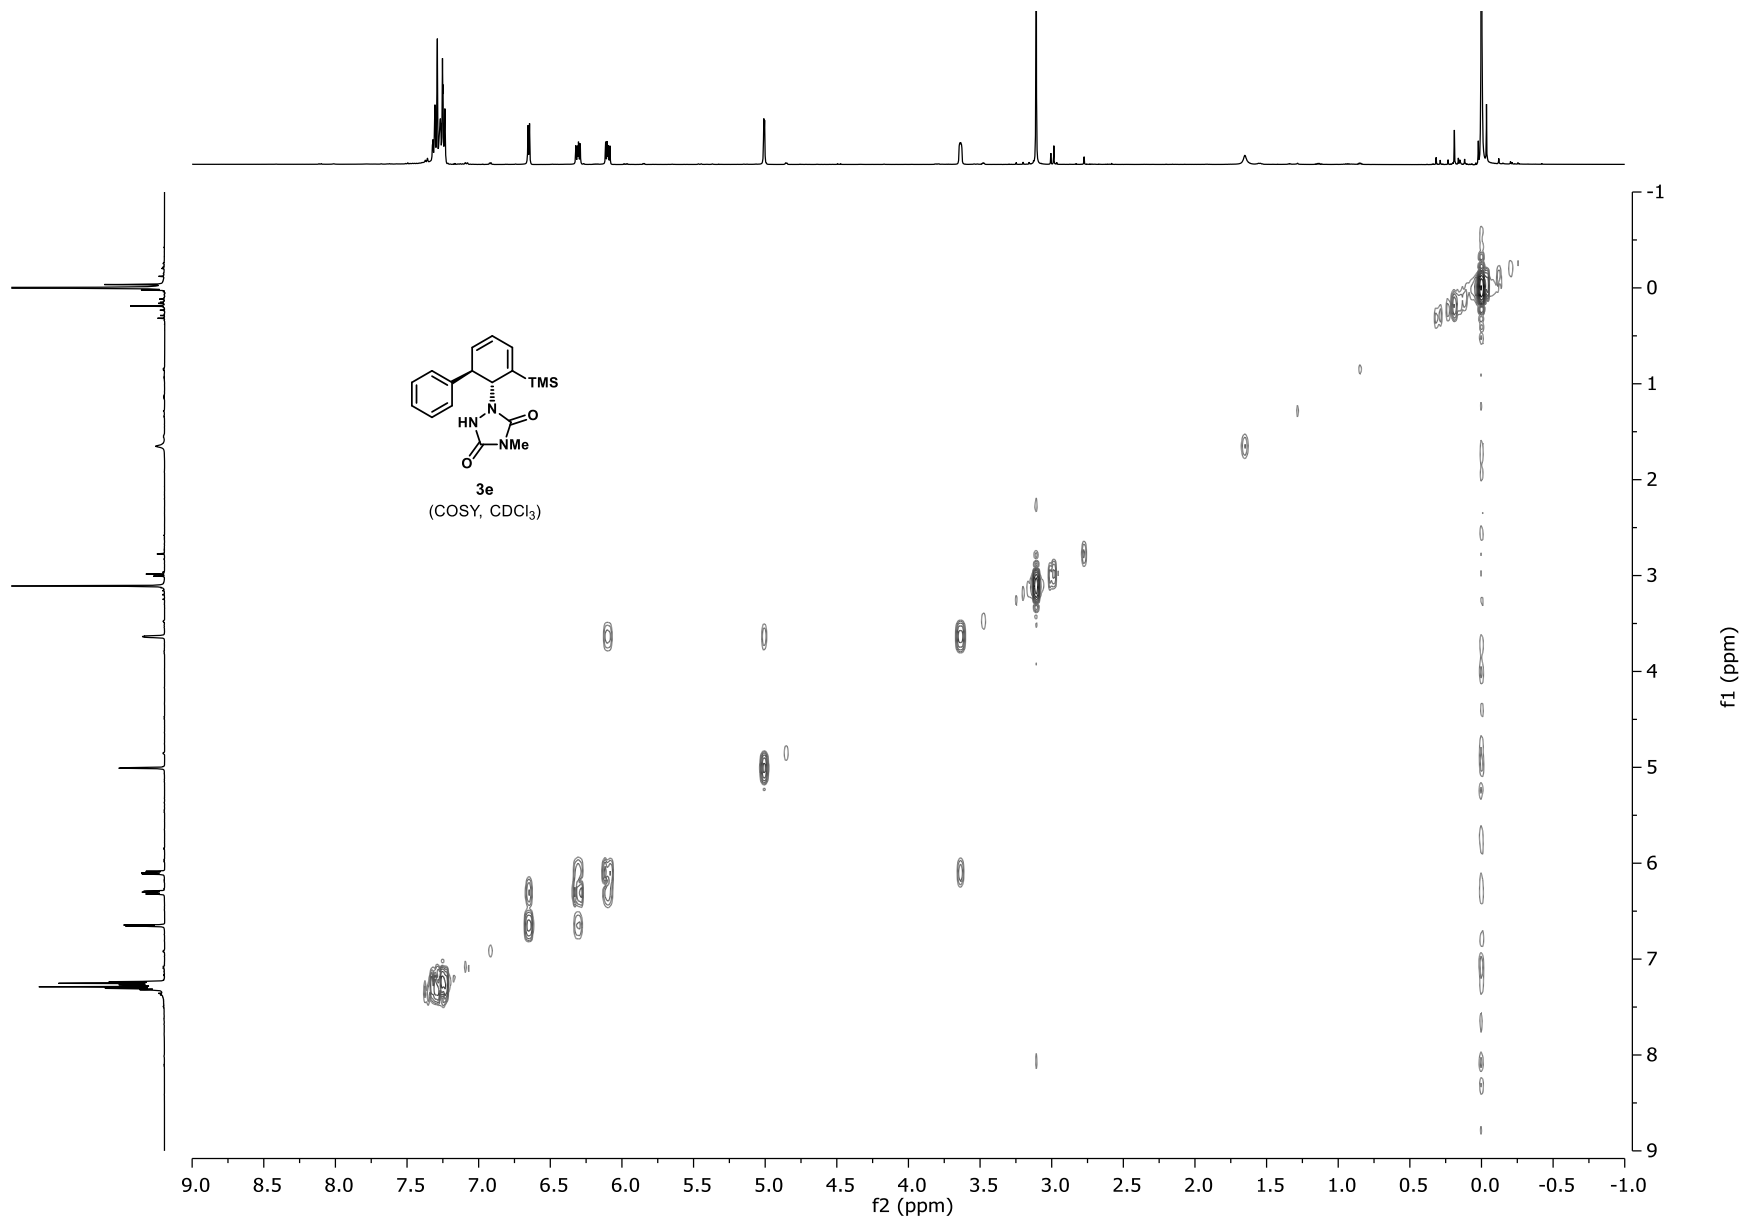



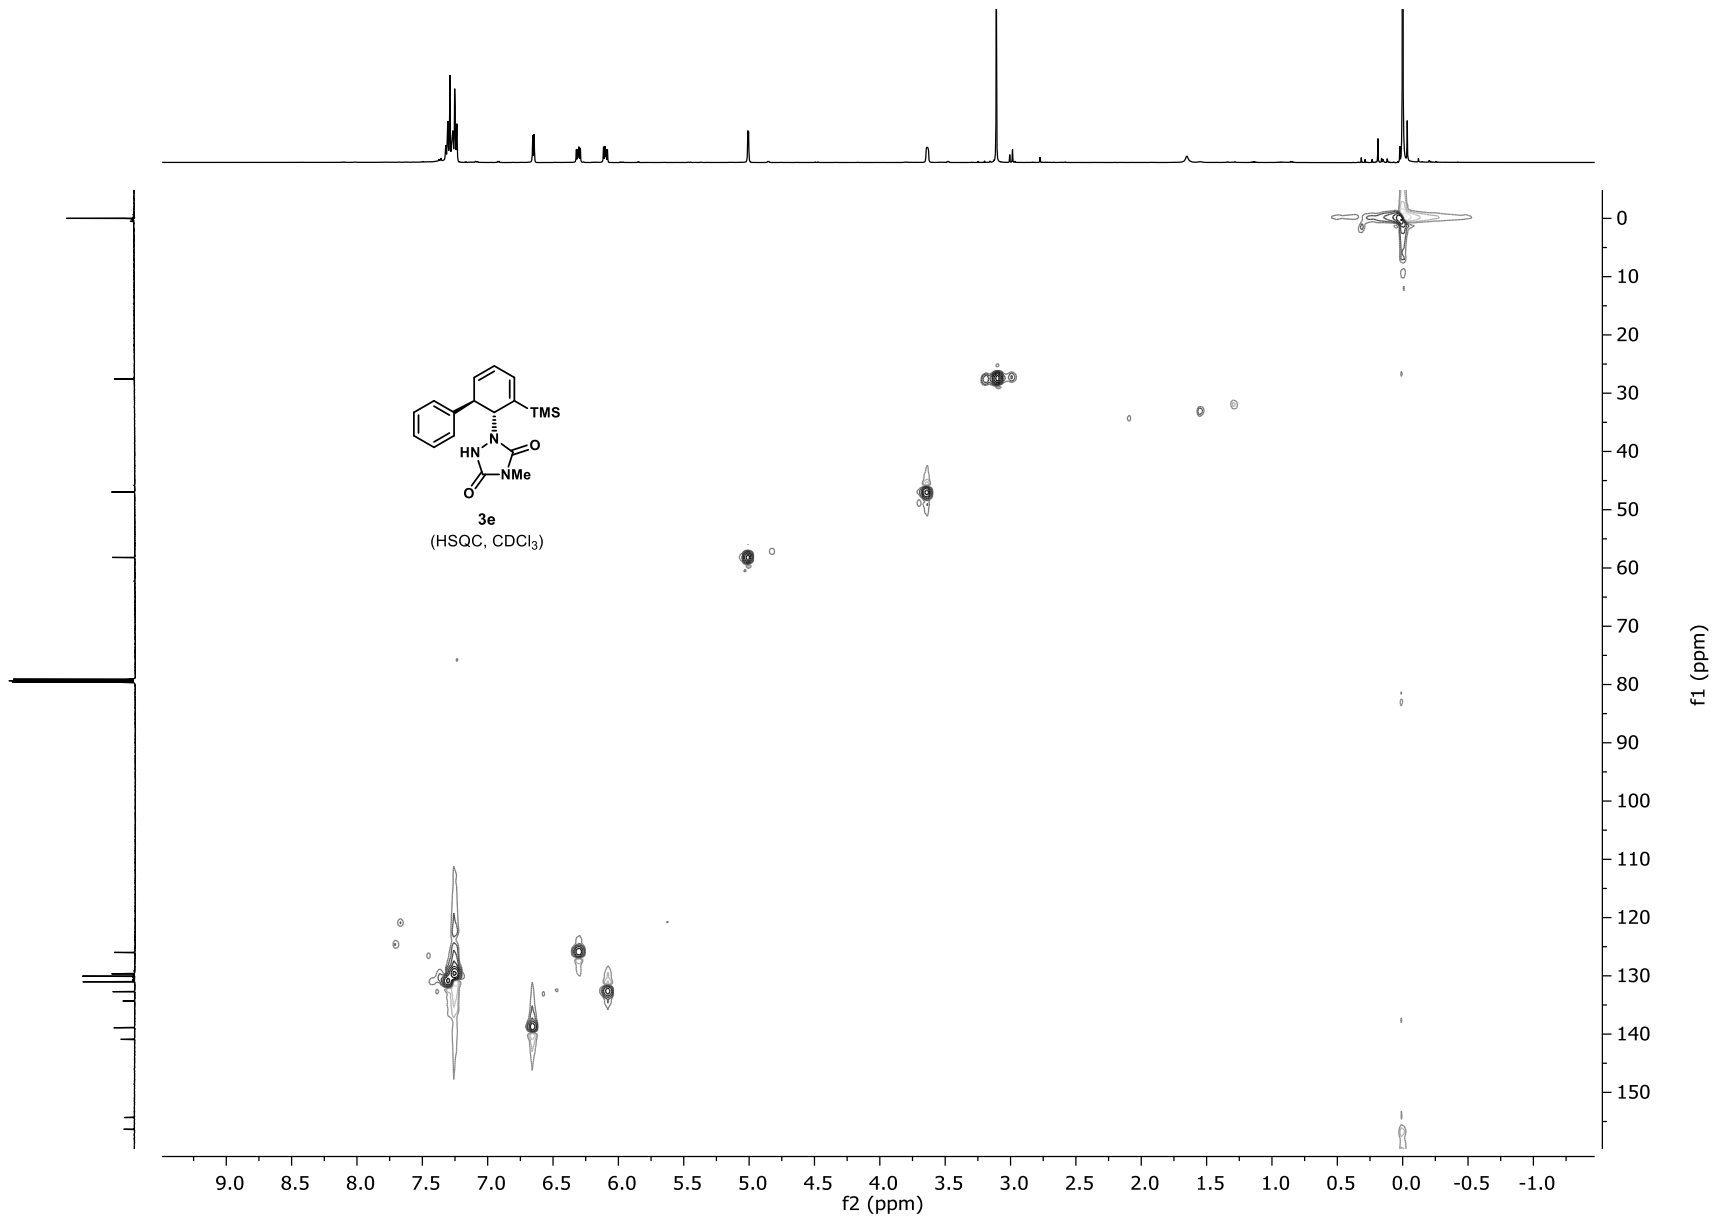

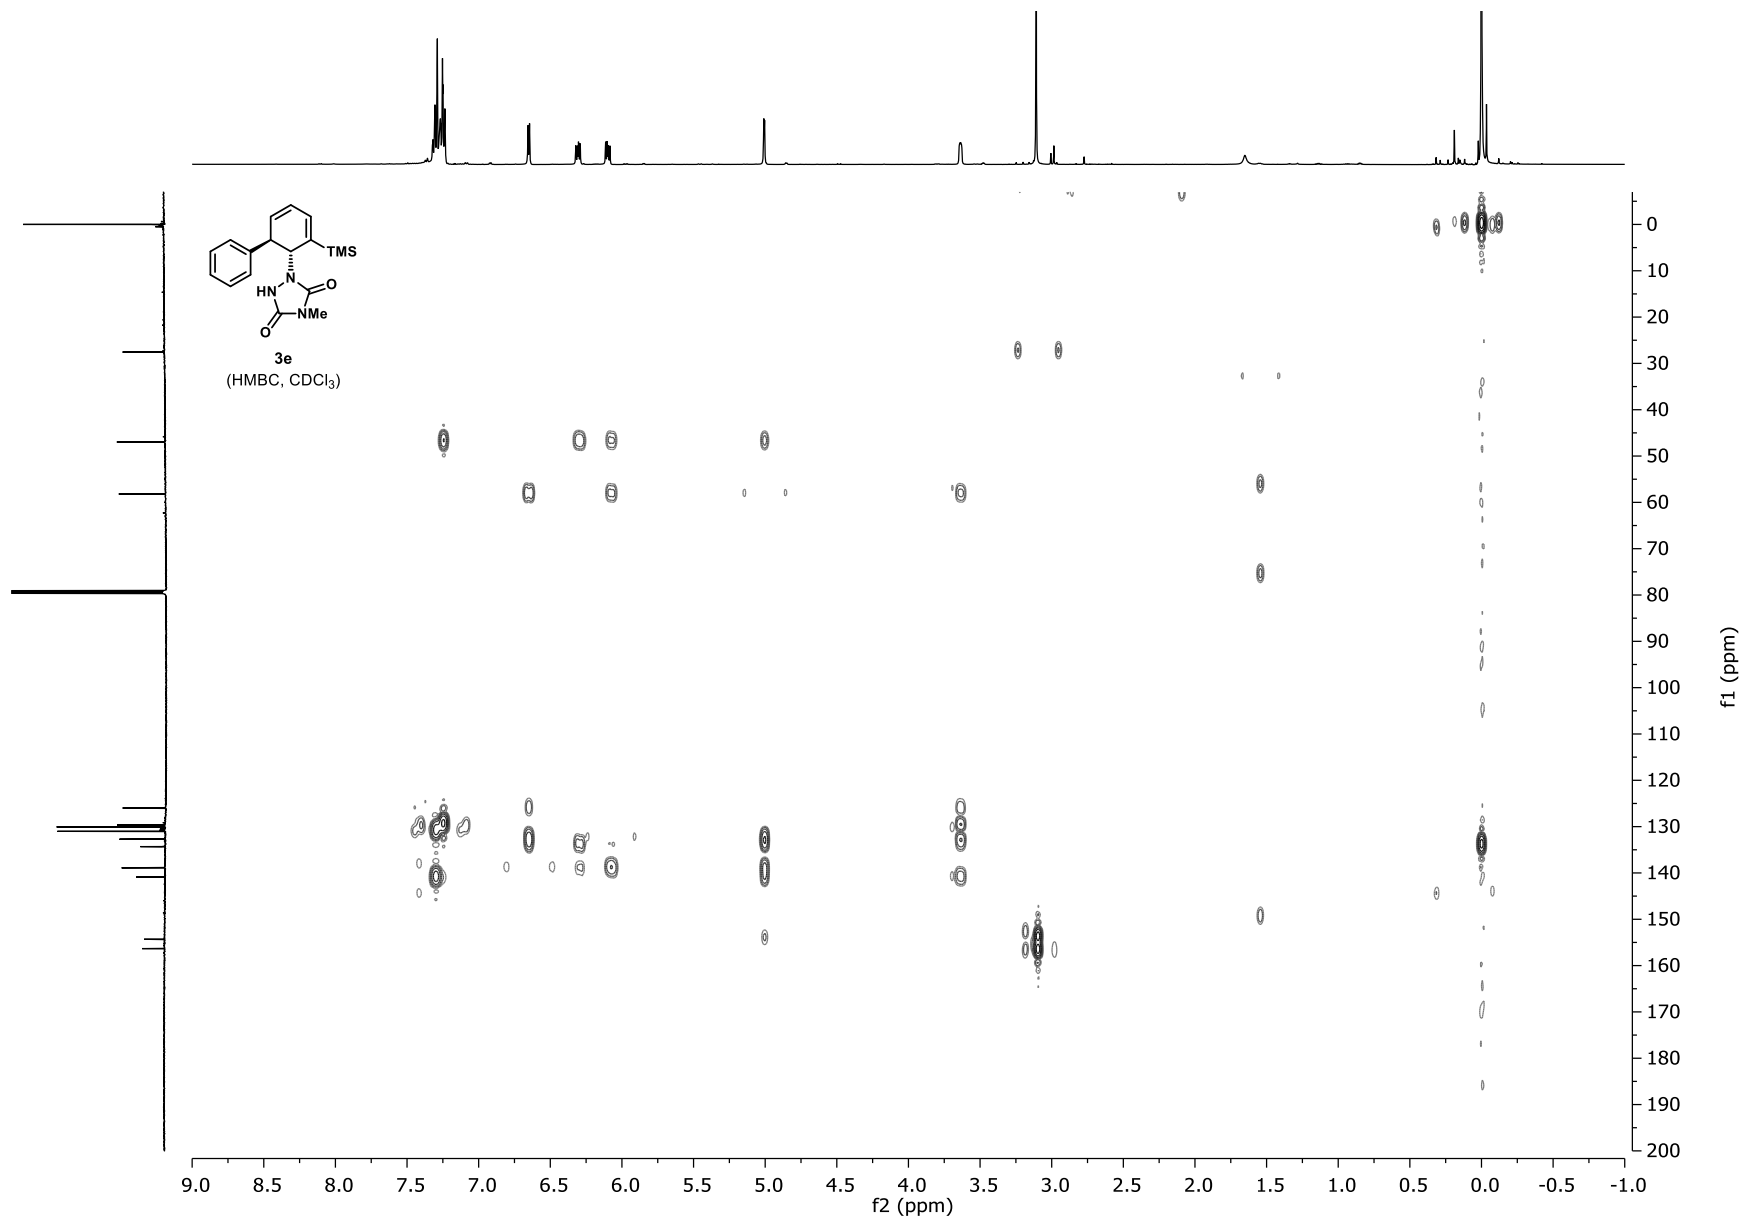

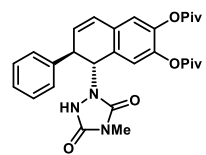

3f  
(<sup>1</sup>H NMR, CDCl<sub>3</sub>, 500 MHz)

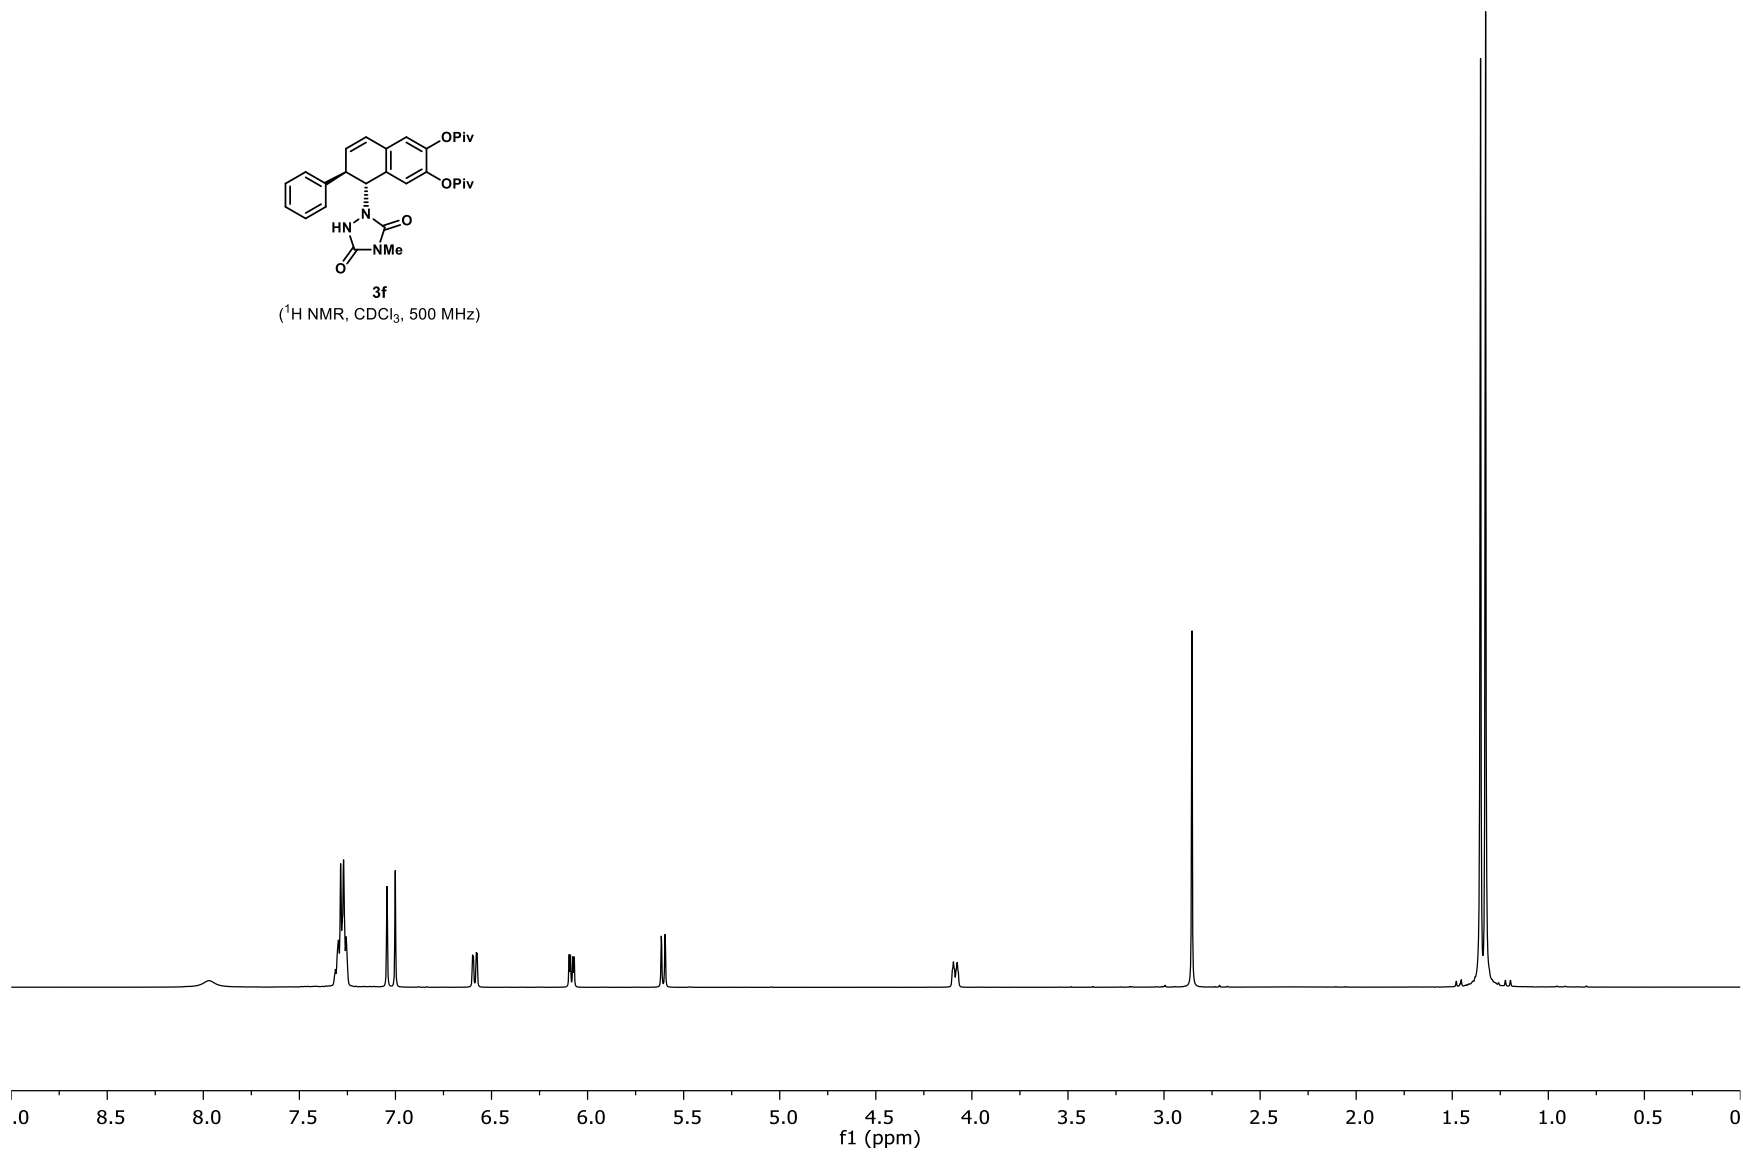

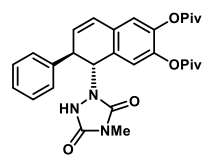

3f  
(<sup>13</sup>C NMR, CDCl<sub>3</sub>, 126 MHz)

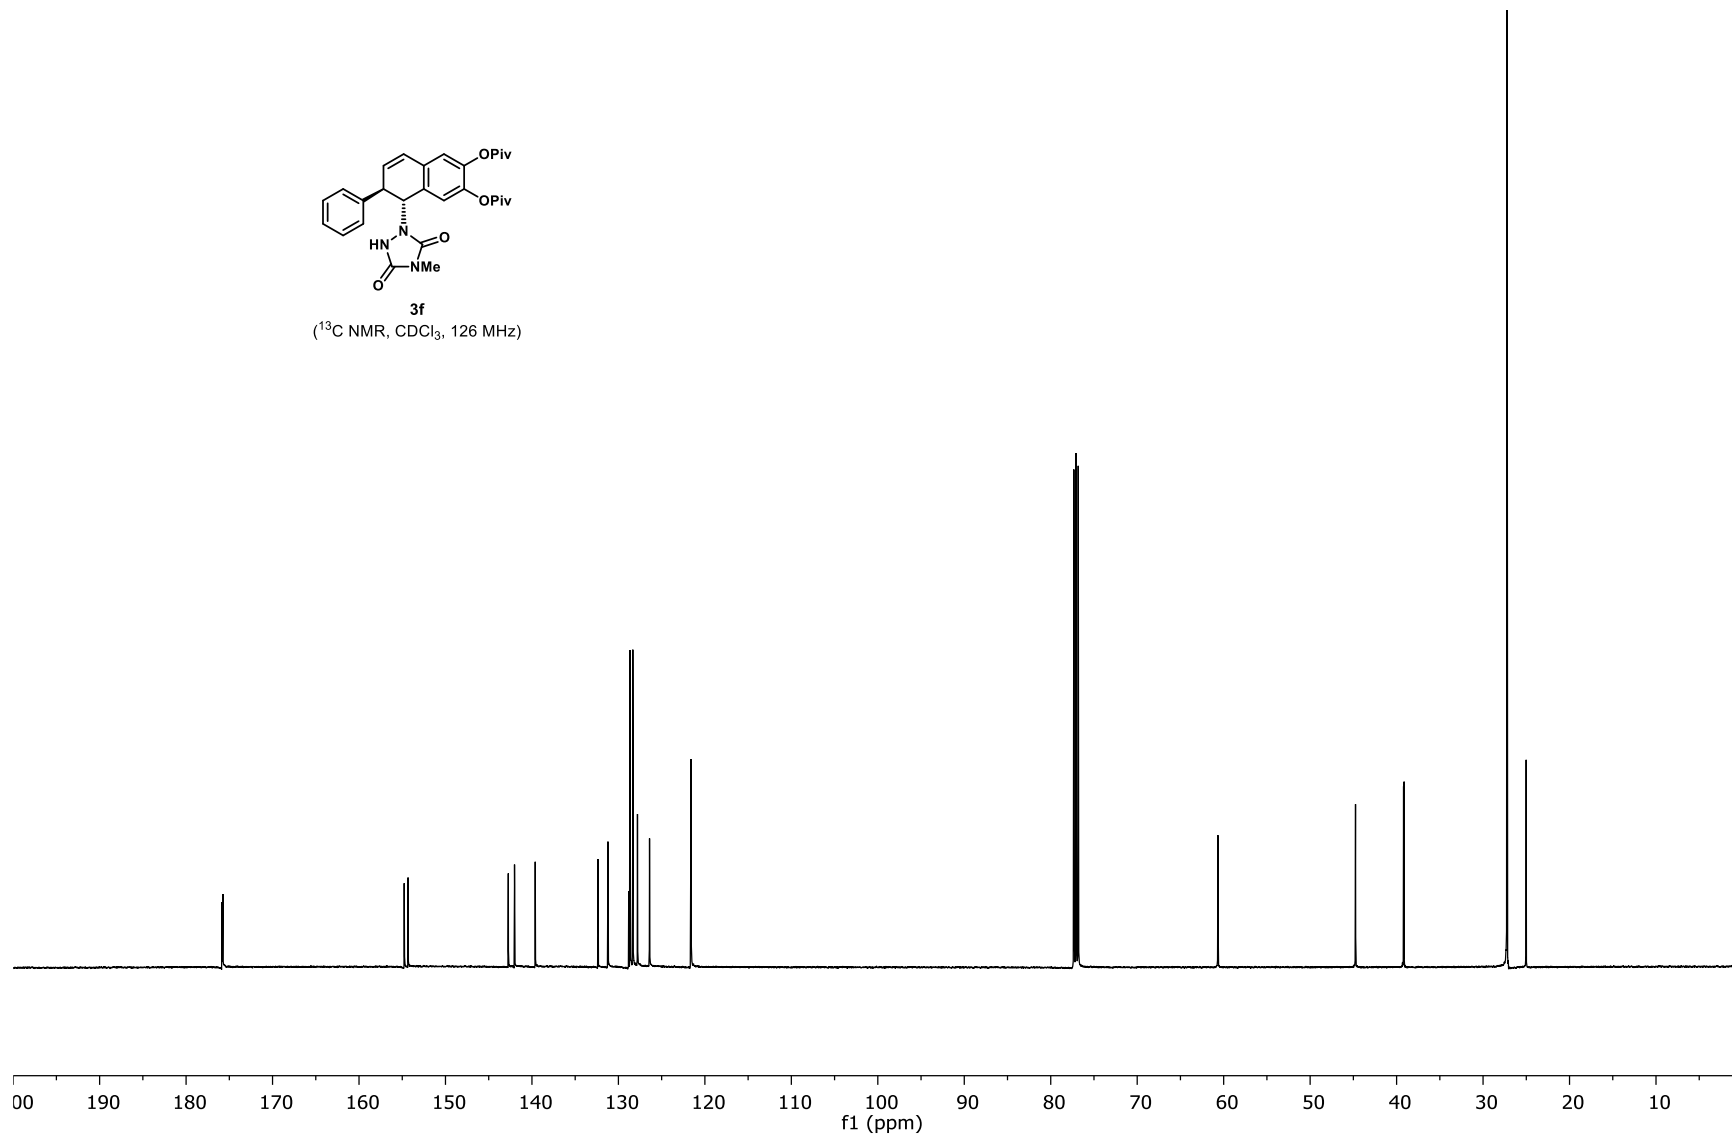

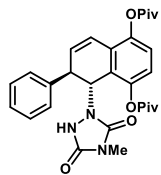

**3g**

(<sup>1</sup>H NMR, CDCl<sub>3</sub>, 500 MHz)

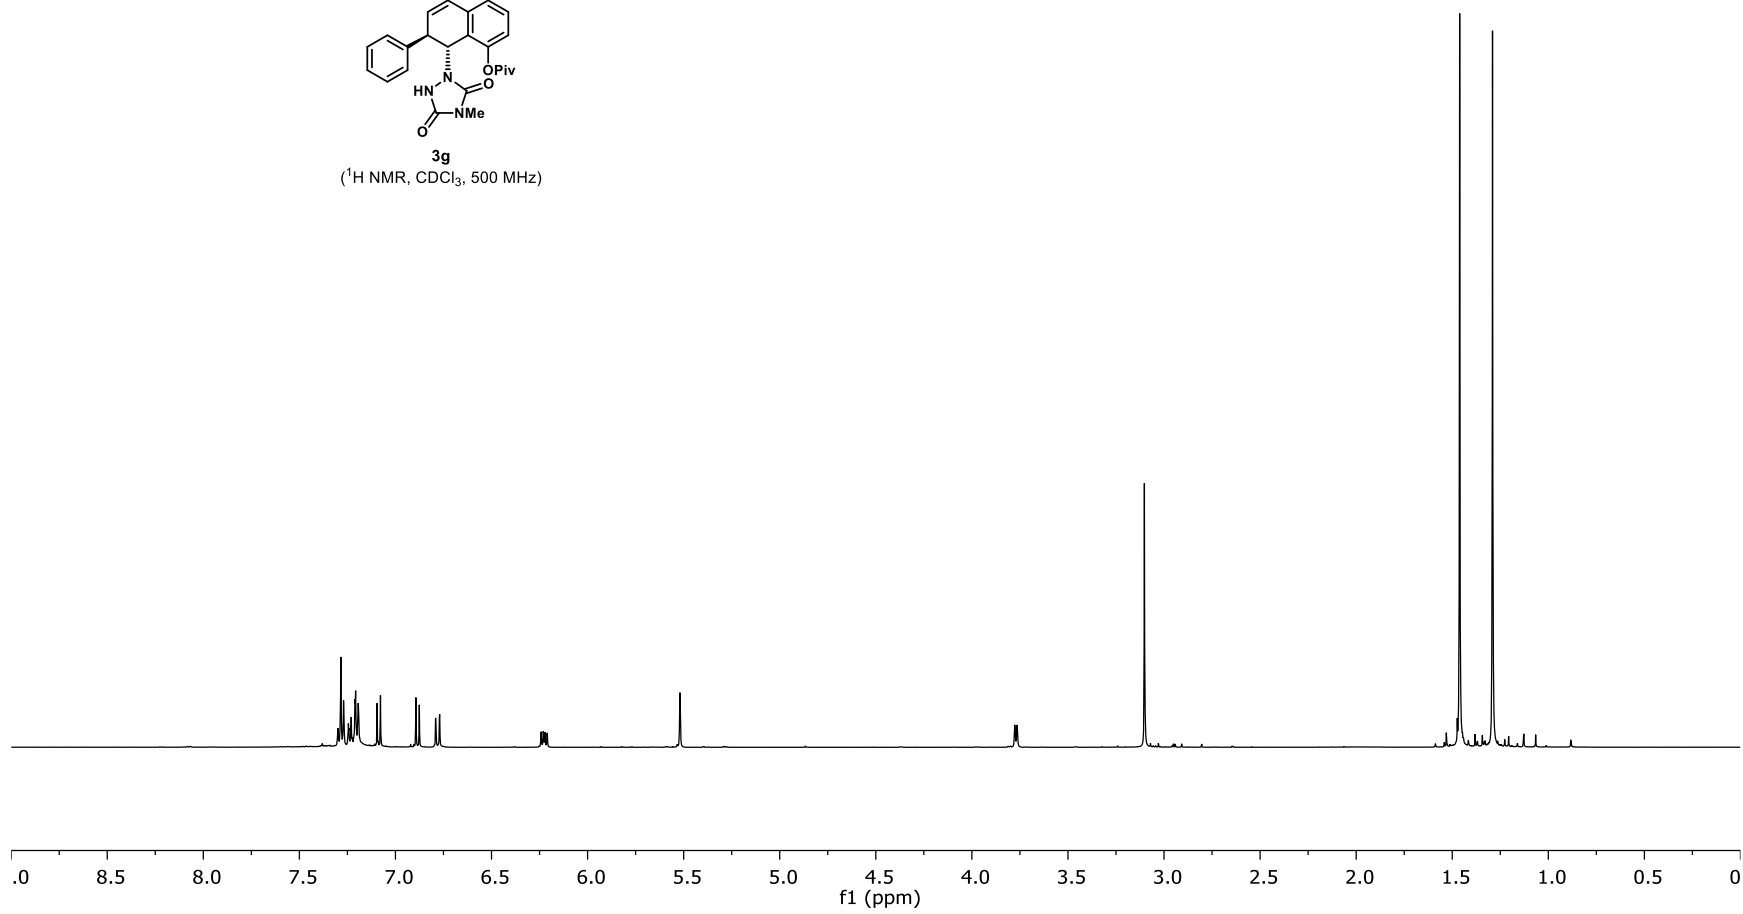

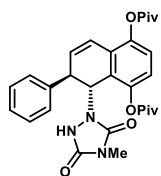

**3g**  
(<sup>13</sup>C NMR, CDCl<sub>3</sub>, 126 MHz)

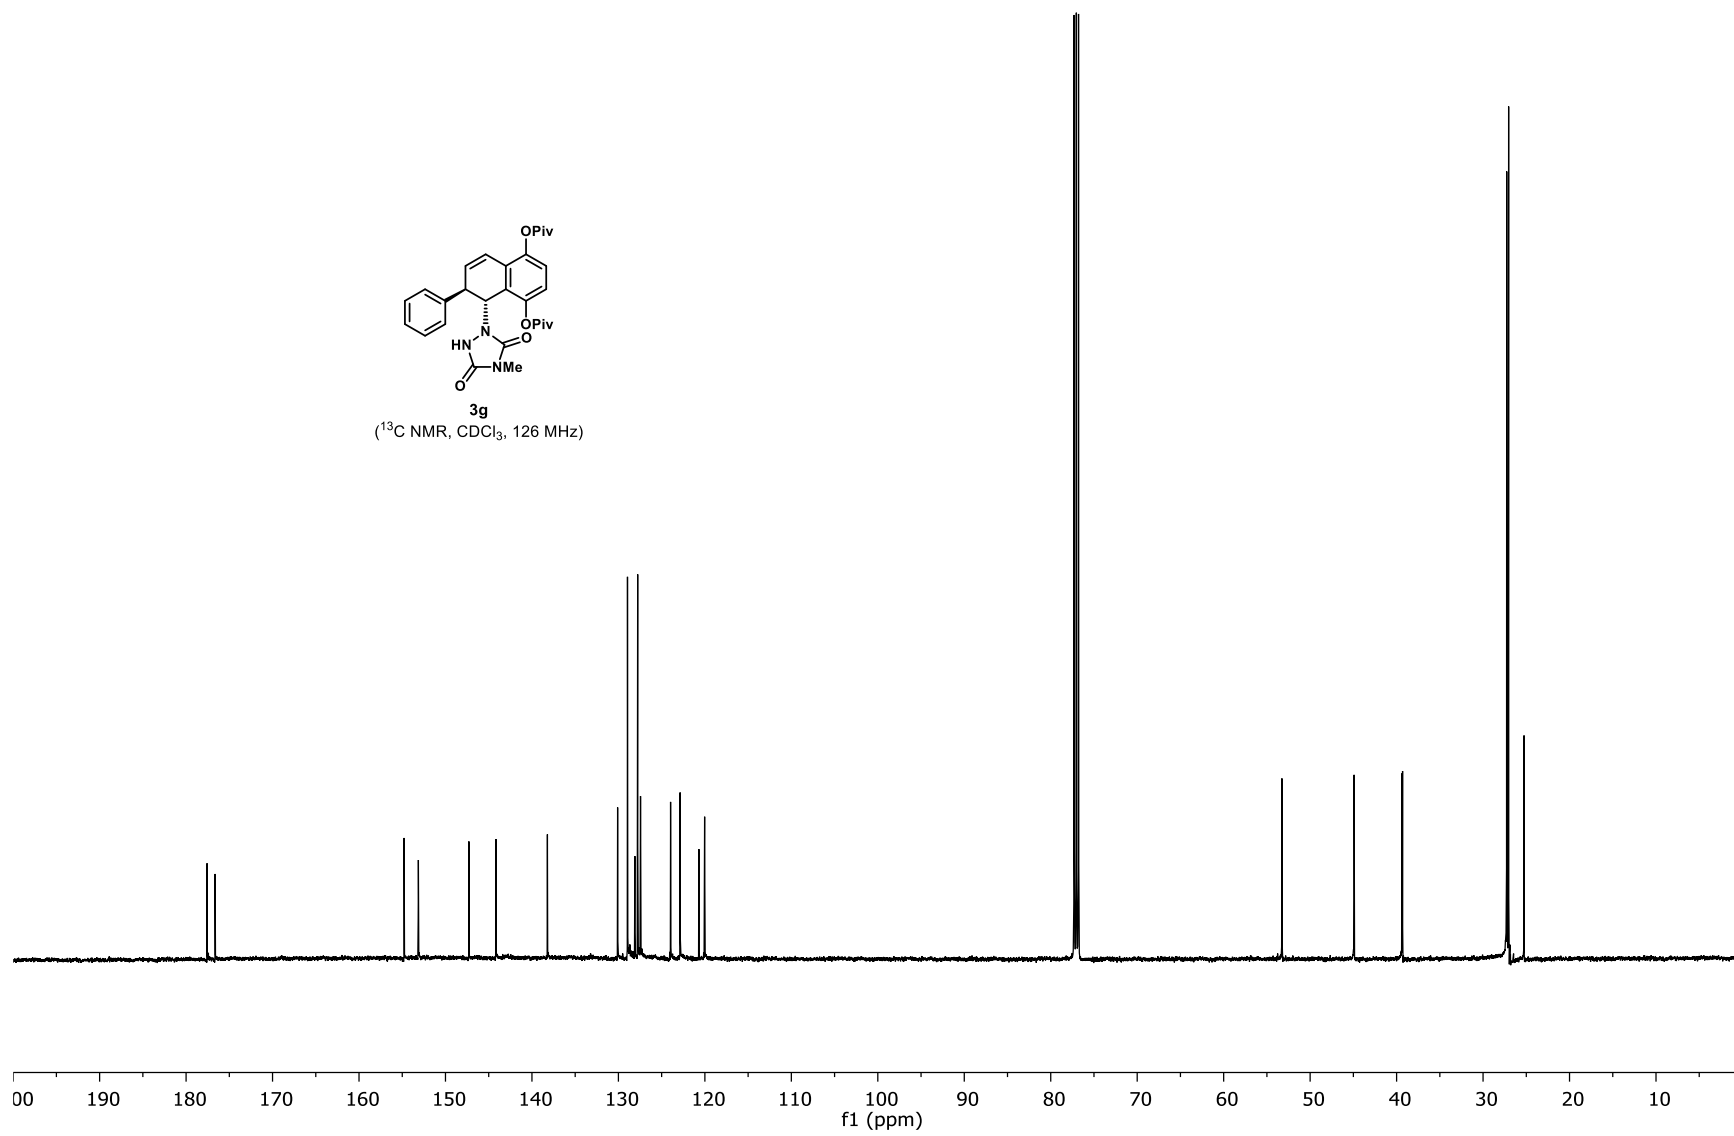

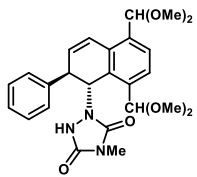

**3h**  
(<sup>1</sup>H NMR, C<sub>6</sub>D<sub>6</sub>, 500 MHz)

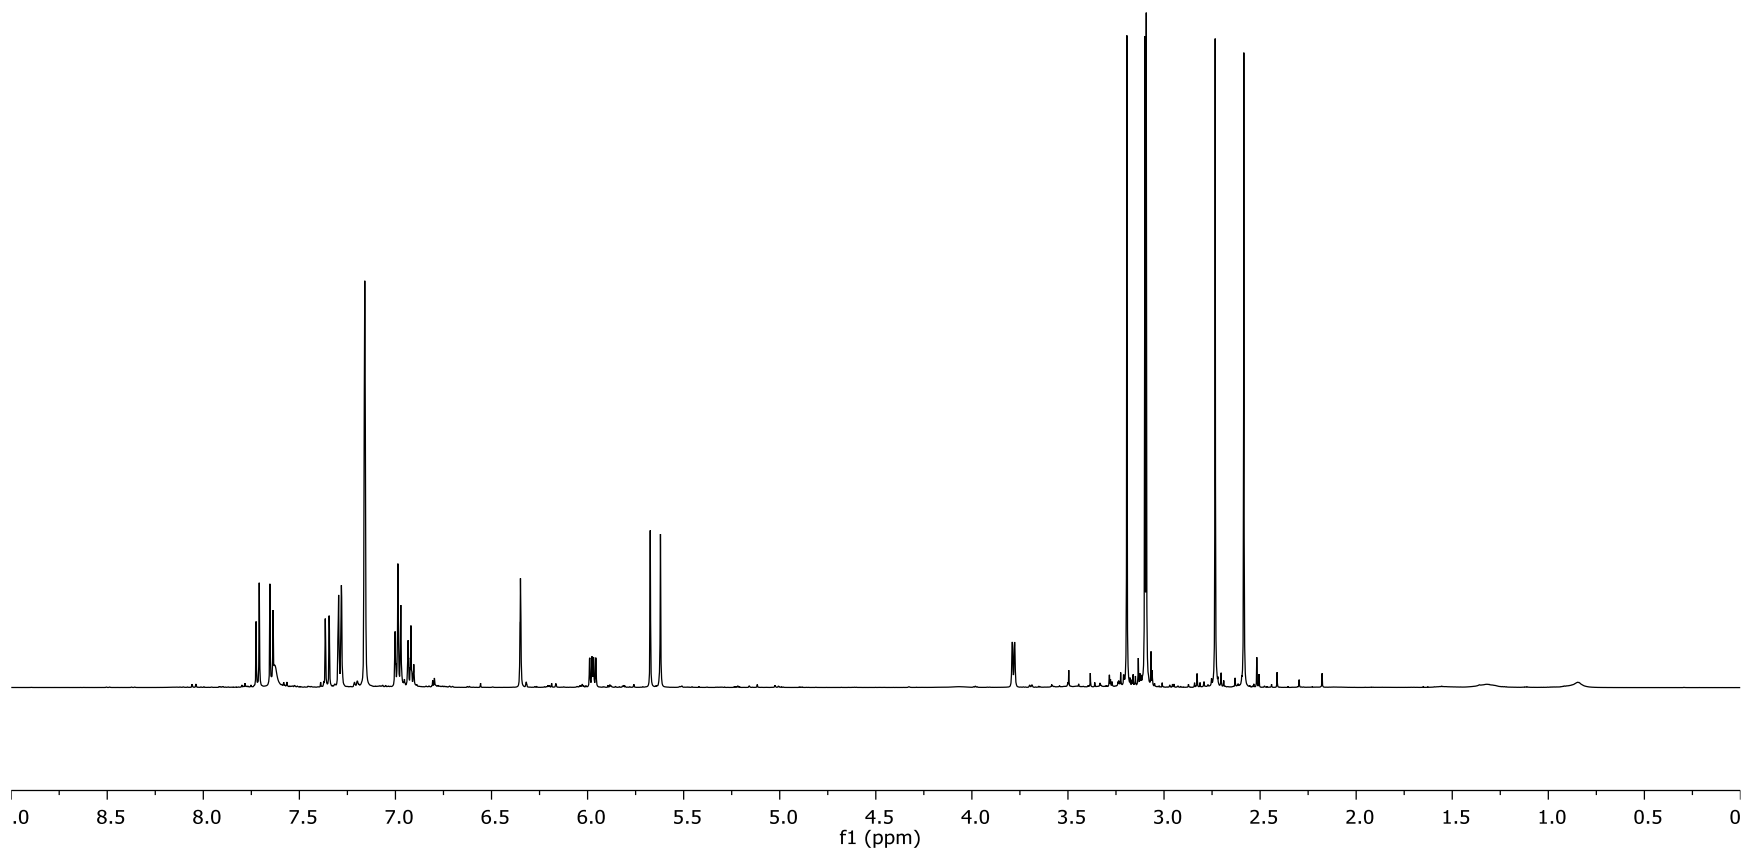

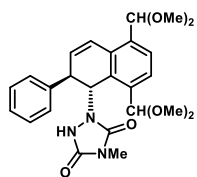

**3h**  
(<sup>13</sup>C NMR, C<sub>6</sub>D<sub>6</sub>, 126 MHz)

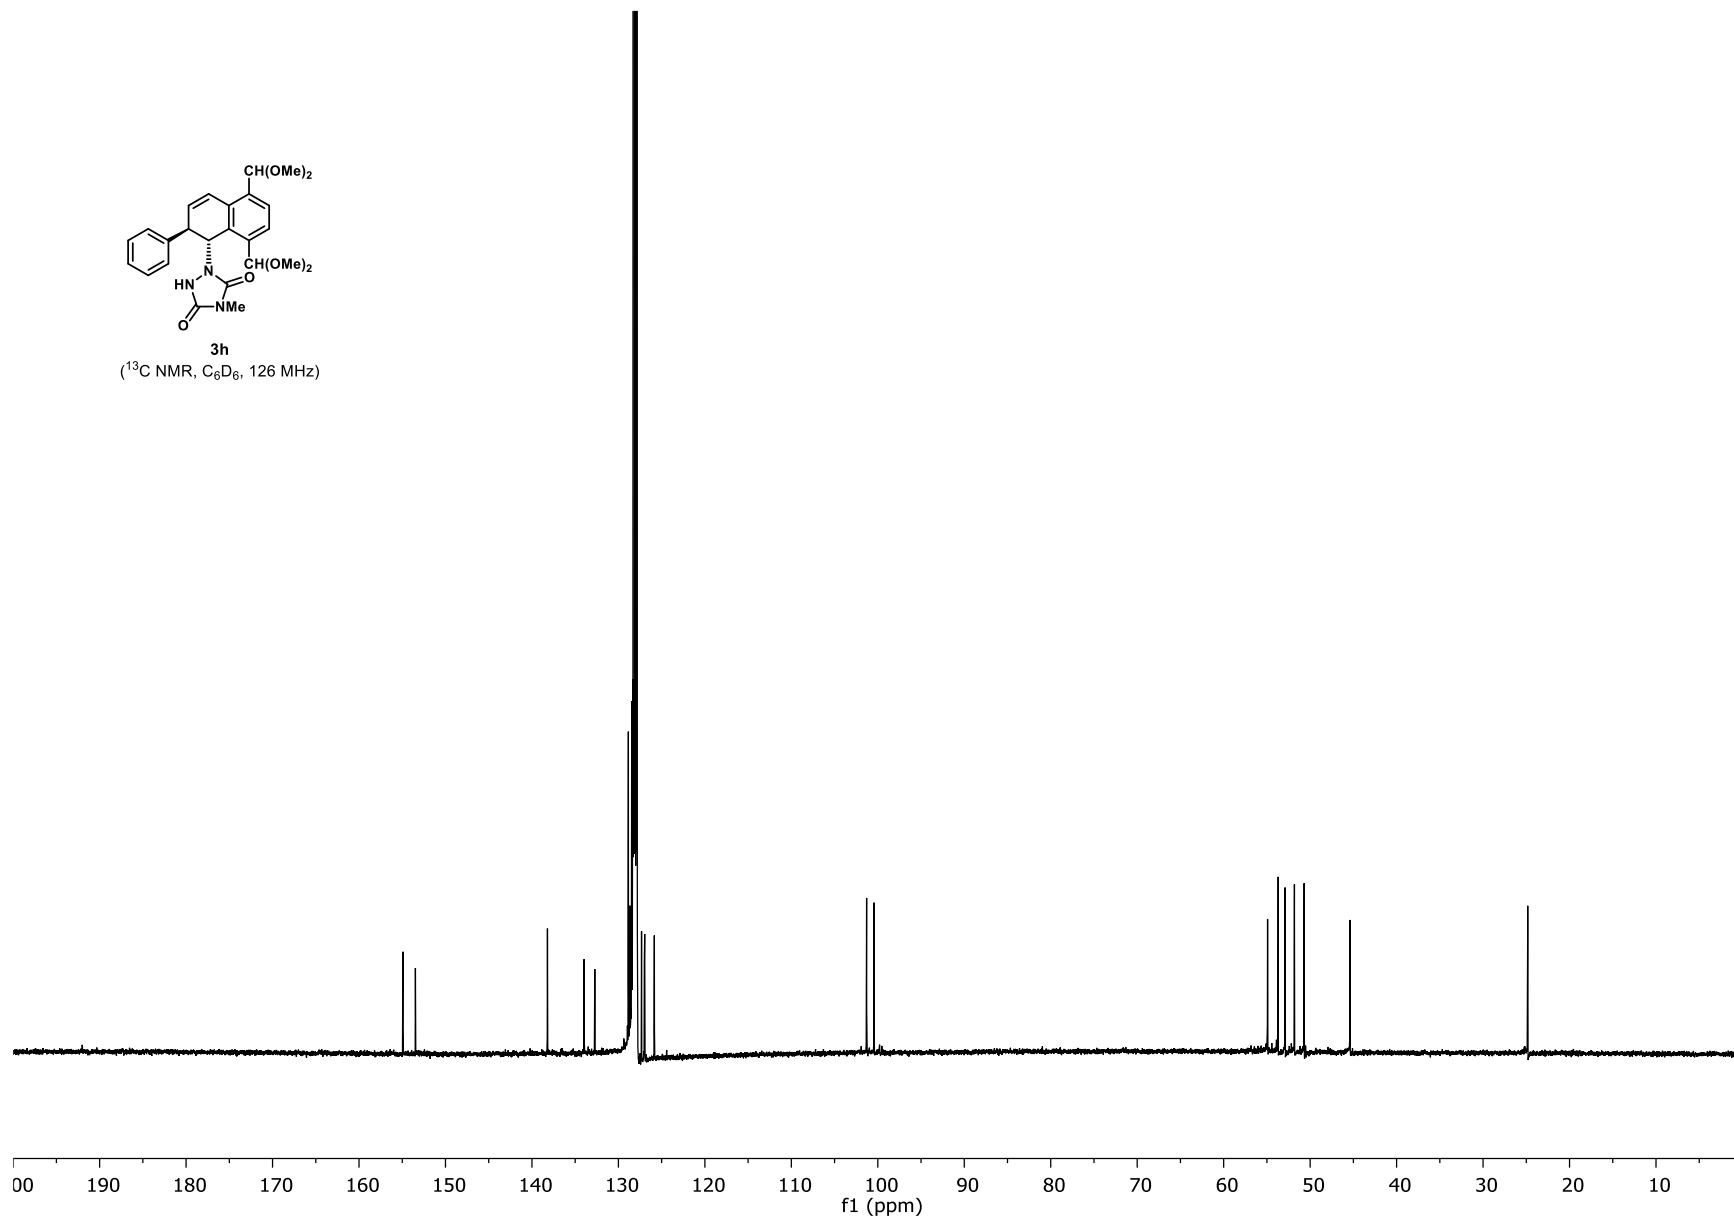



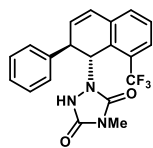

**3i**  
(<sup>1</sup>H NMR, CDCl<sub>3</sub>, 500 MHz)

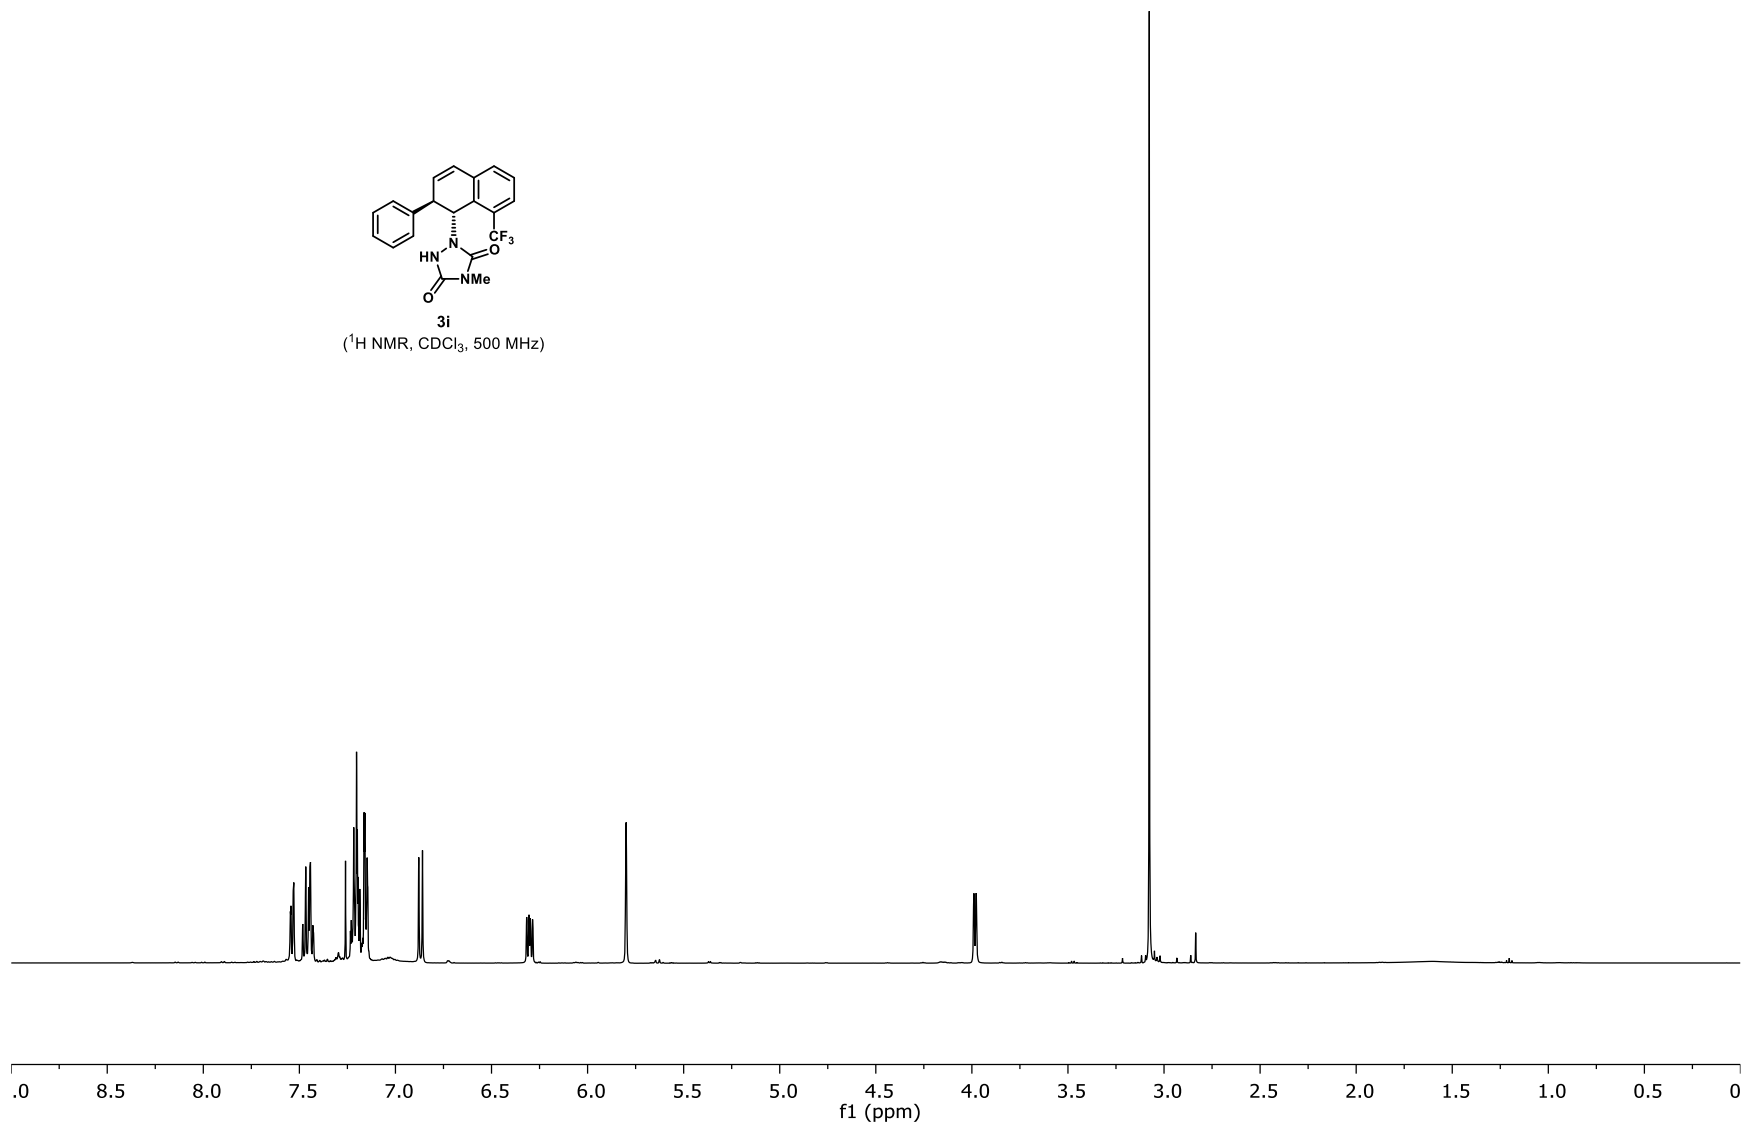

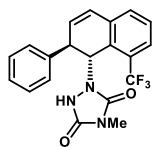

3i  
(<sup>13</sup>C NMR, CDCl<sub>3</sub>, 126 MHz)

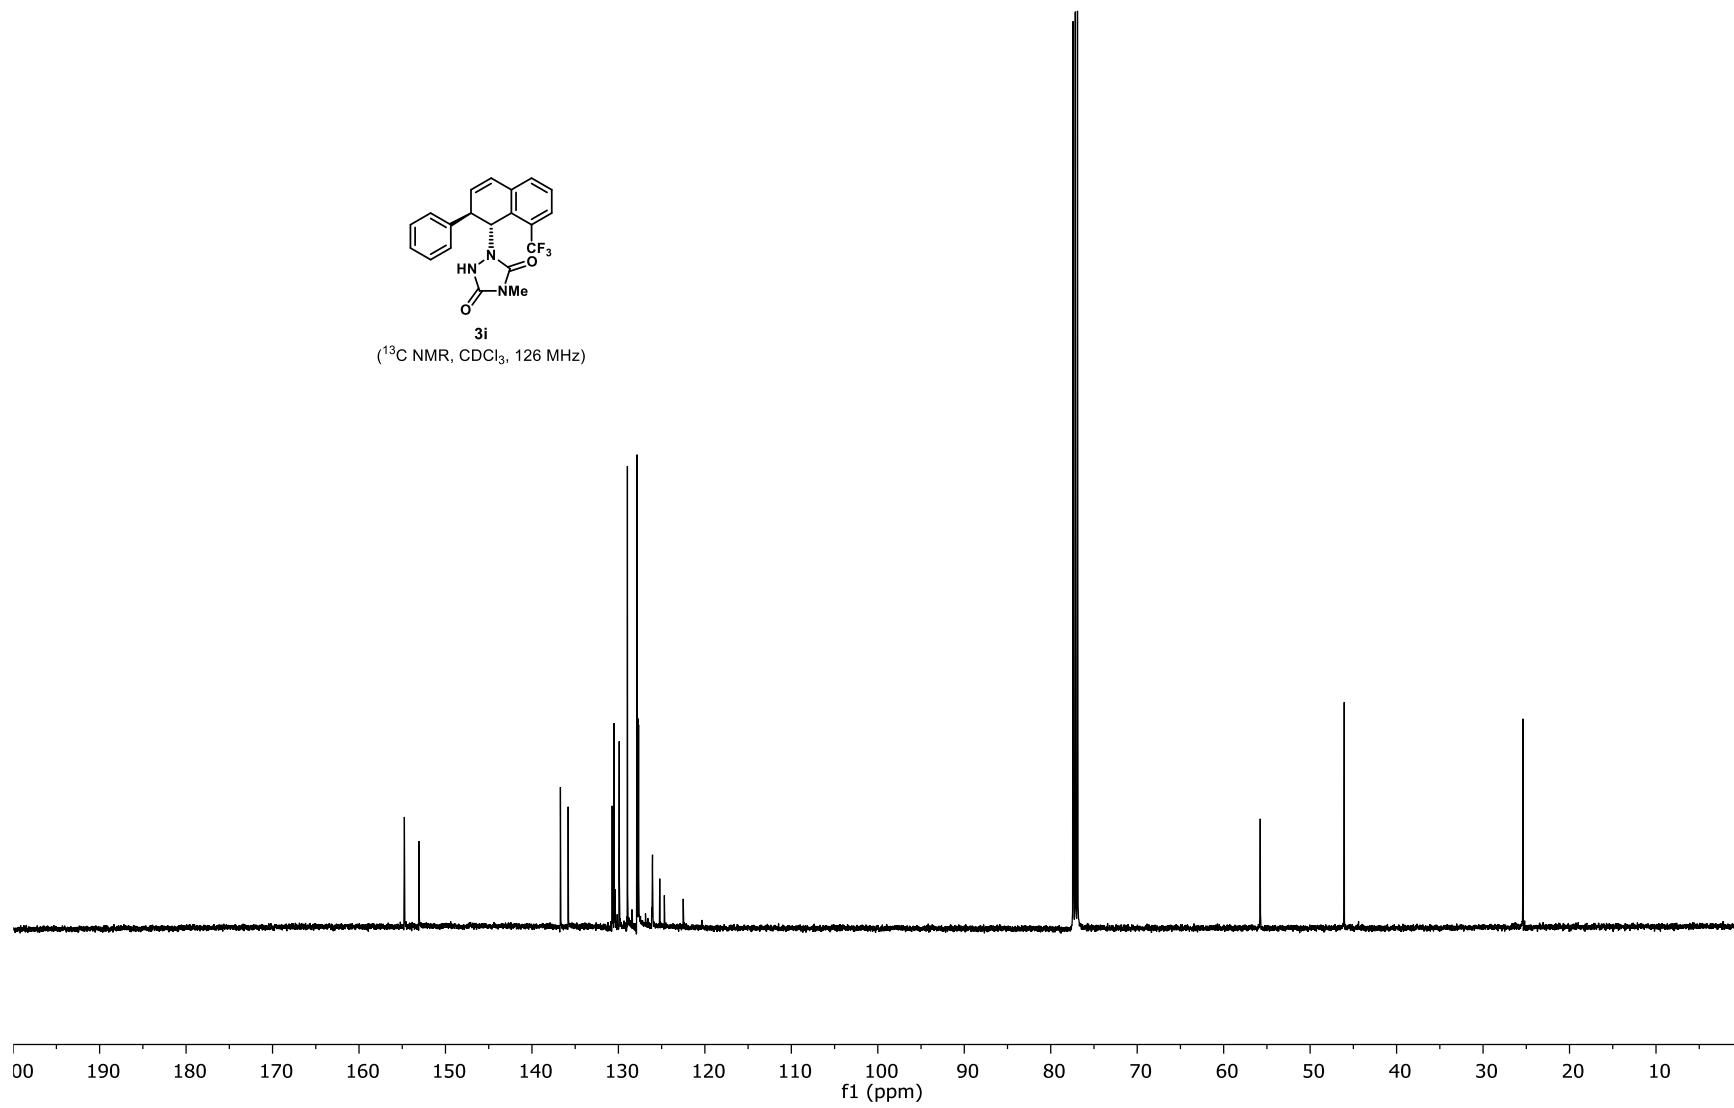

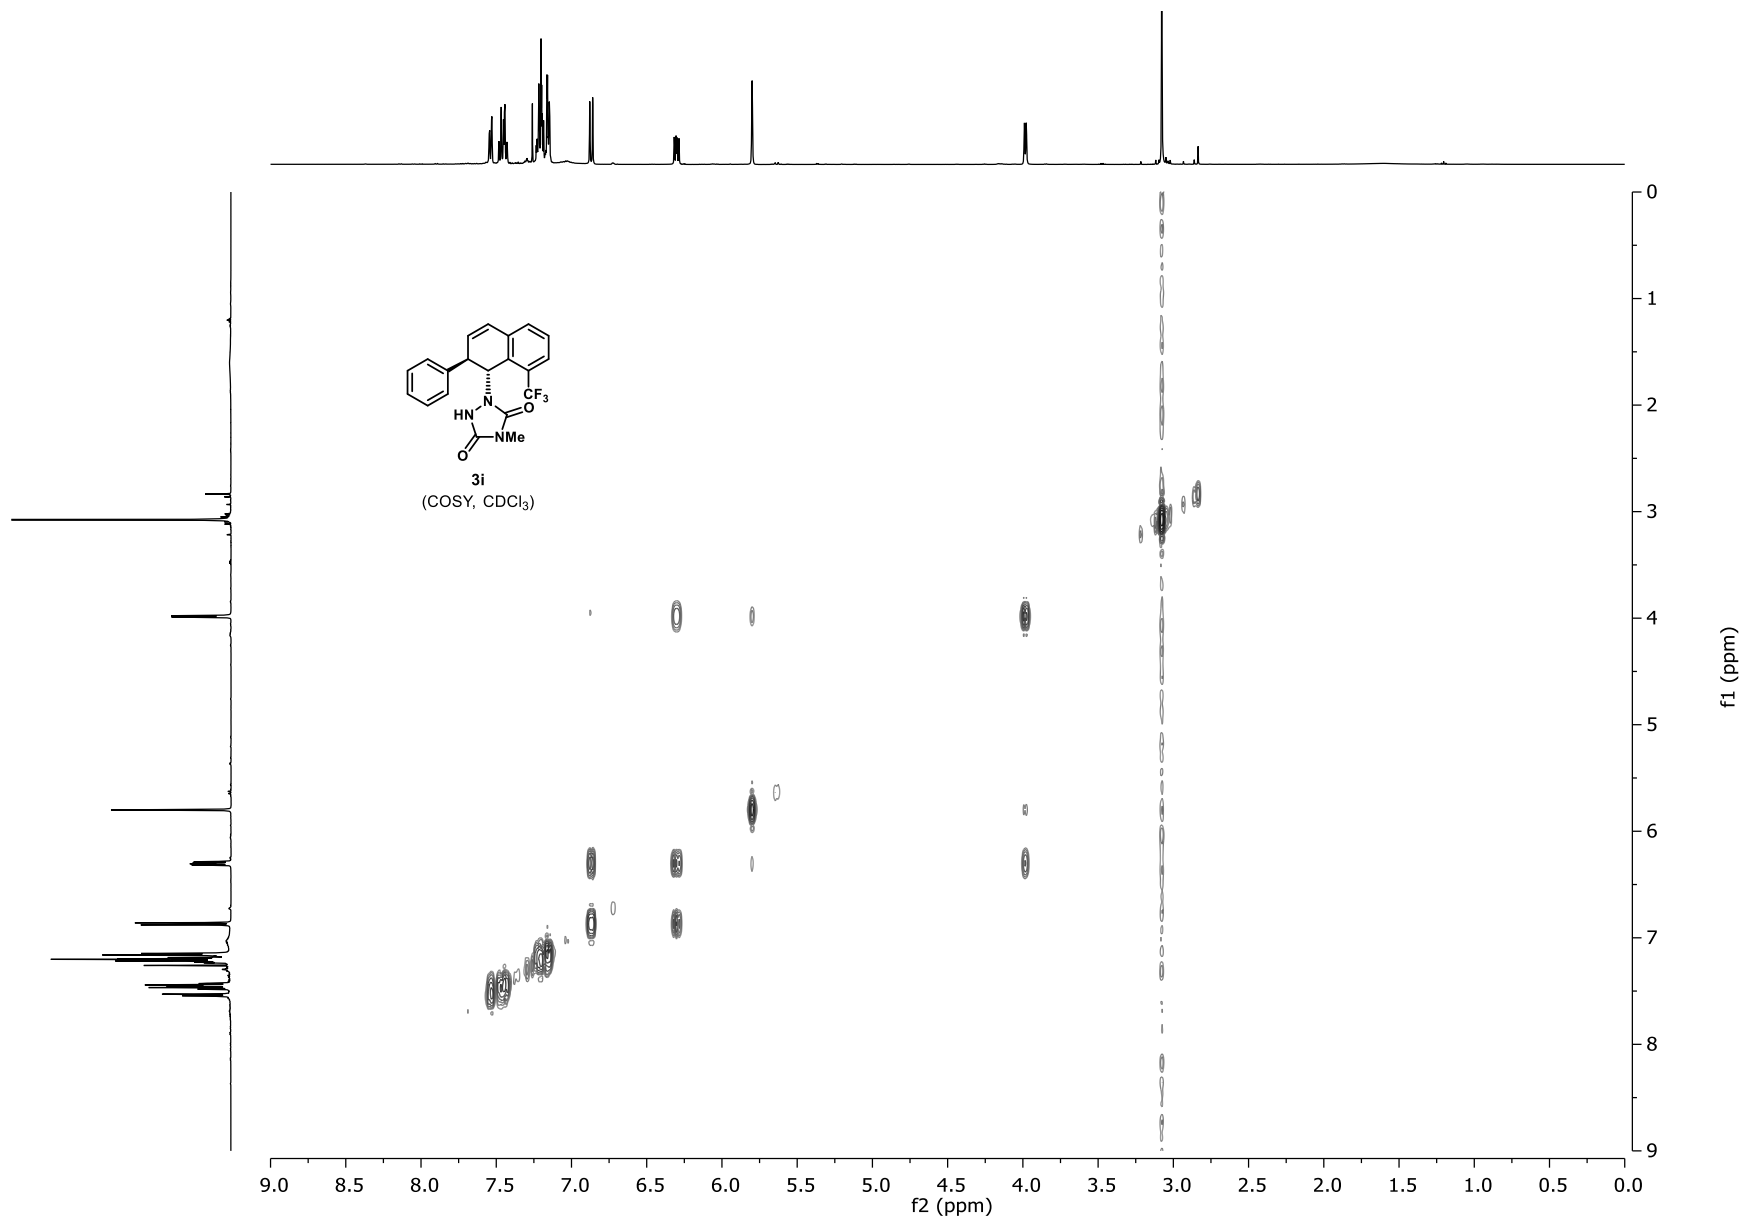

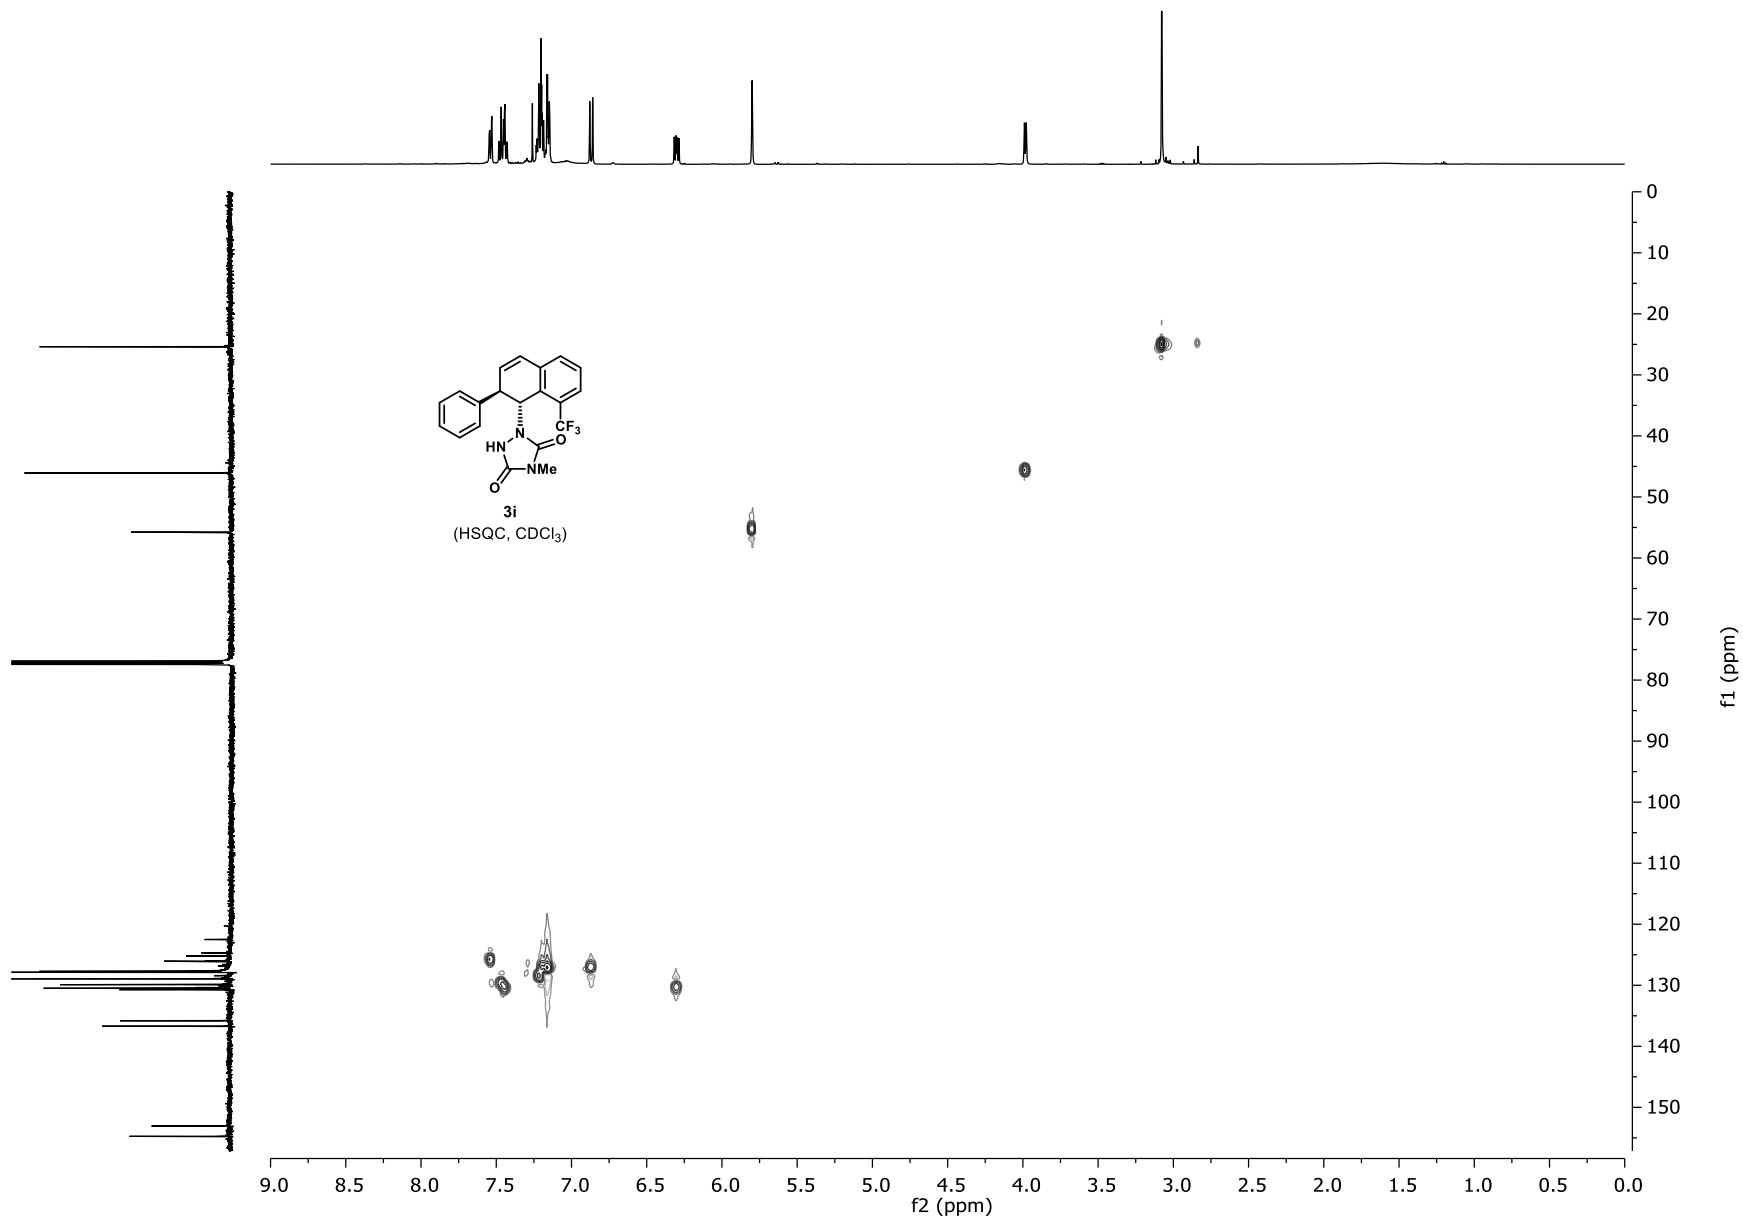

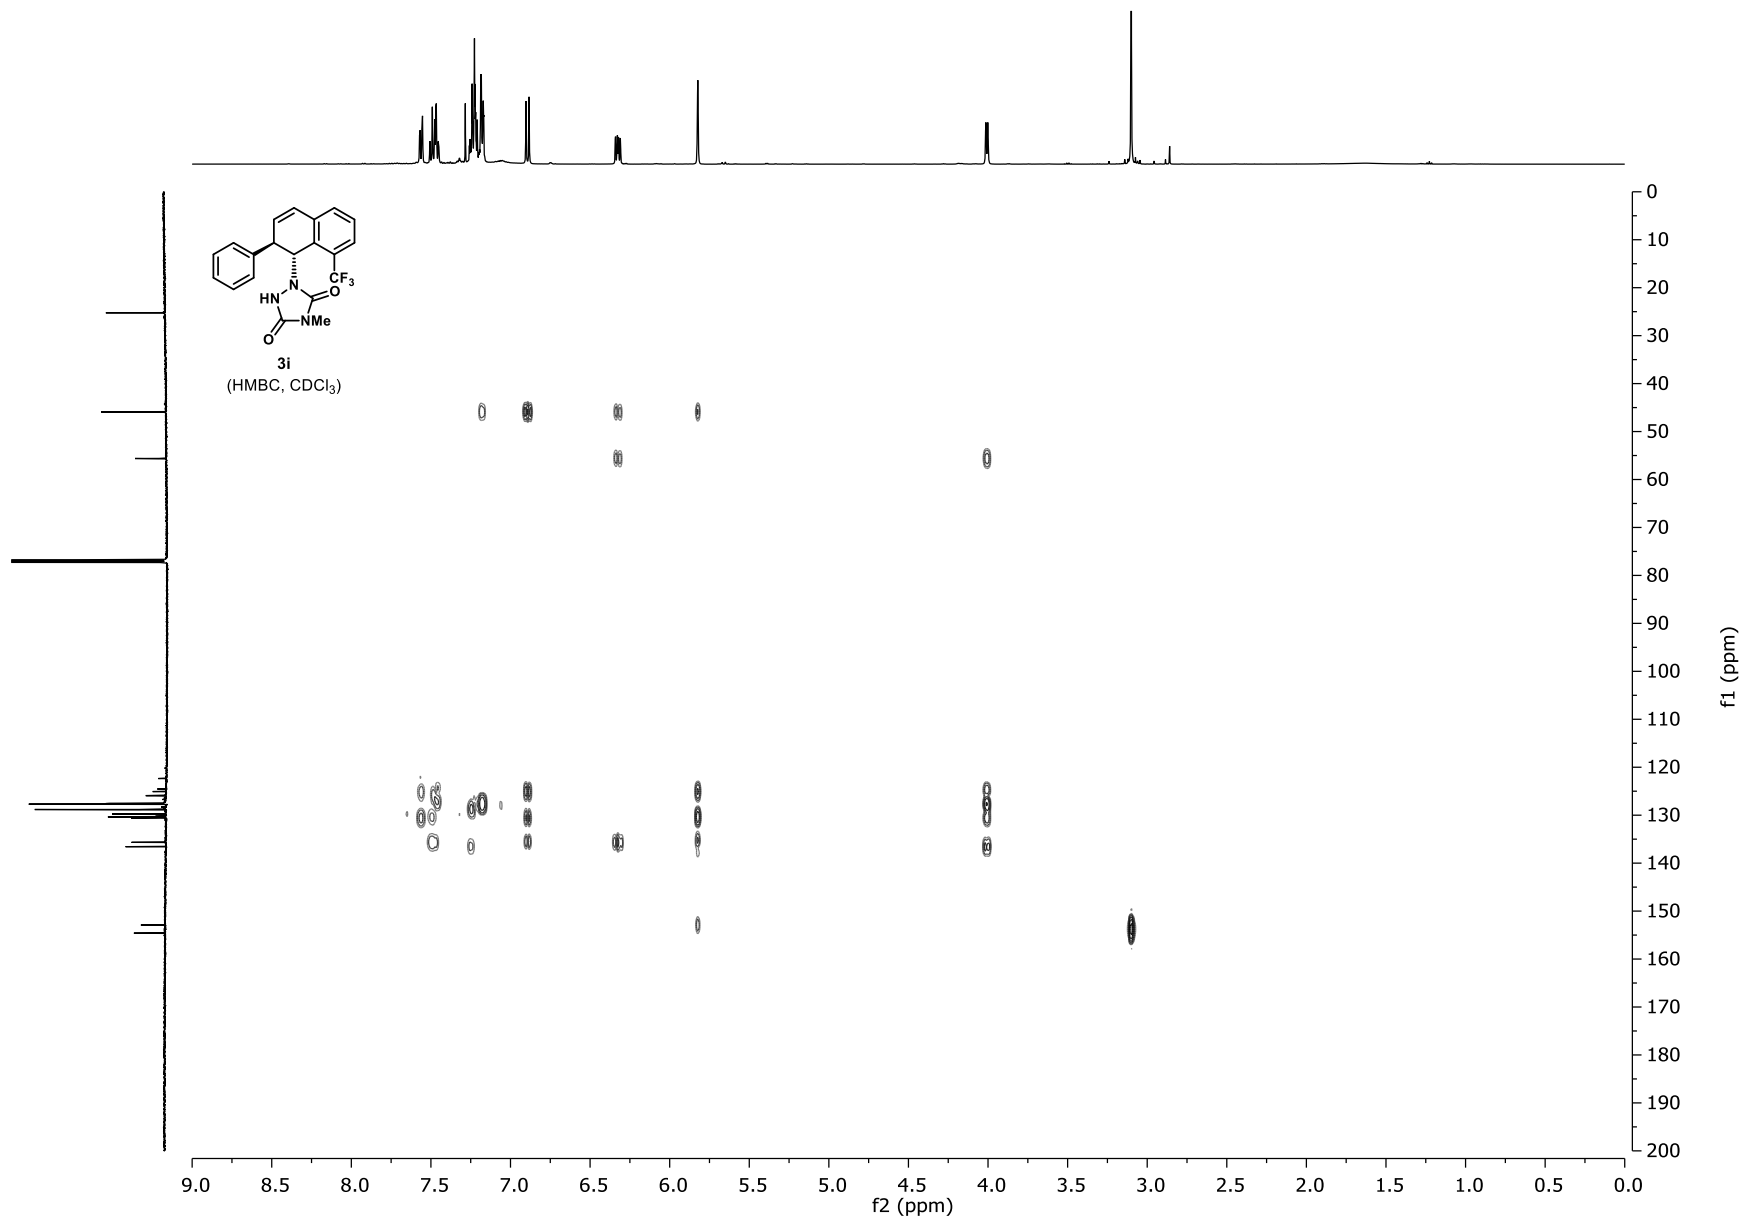

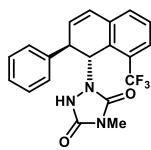

3i

(<sup>19</sup>F NMR, CDCl<sub>3</sub>, 471 MHz)

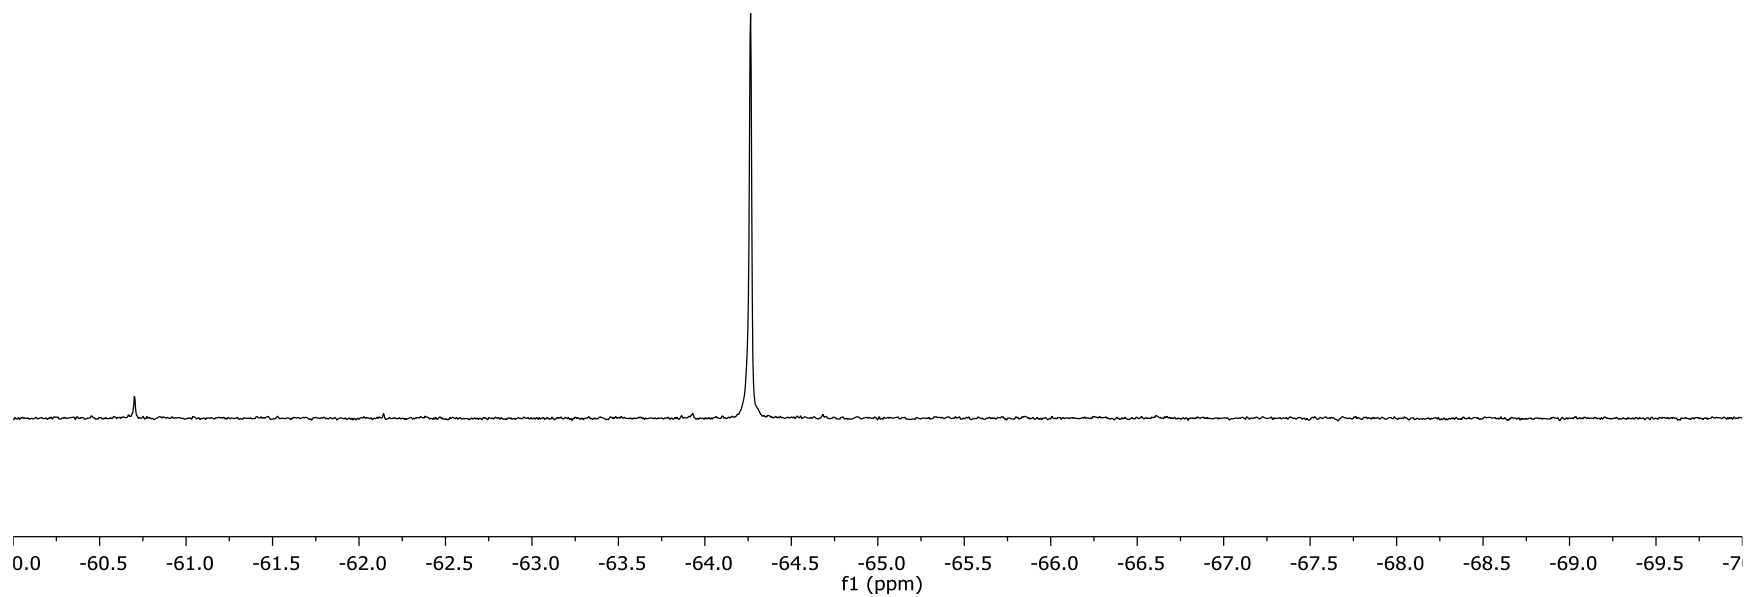

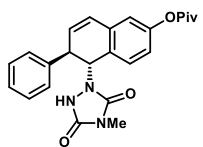

**3j-major**  
(<sup>1</sup>H NMR, CDCl<sub>3</sub>, 500 MHz)

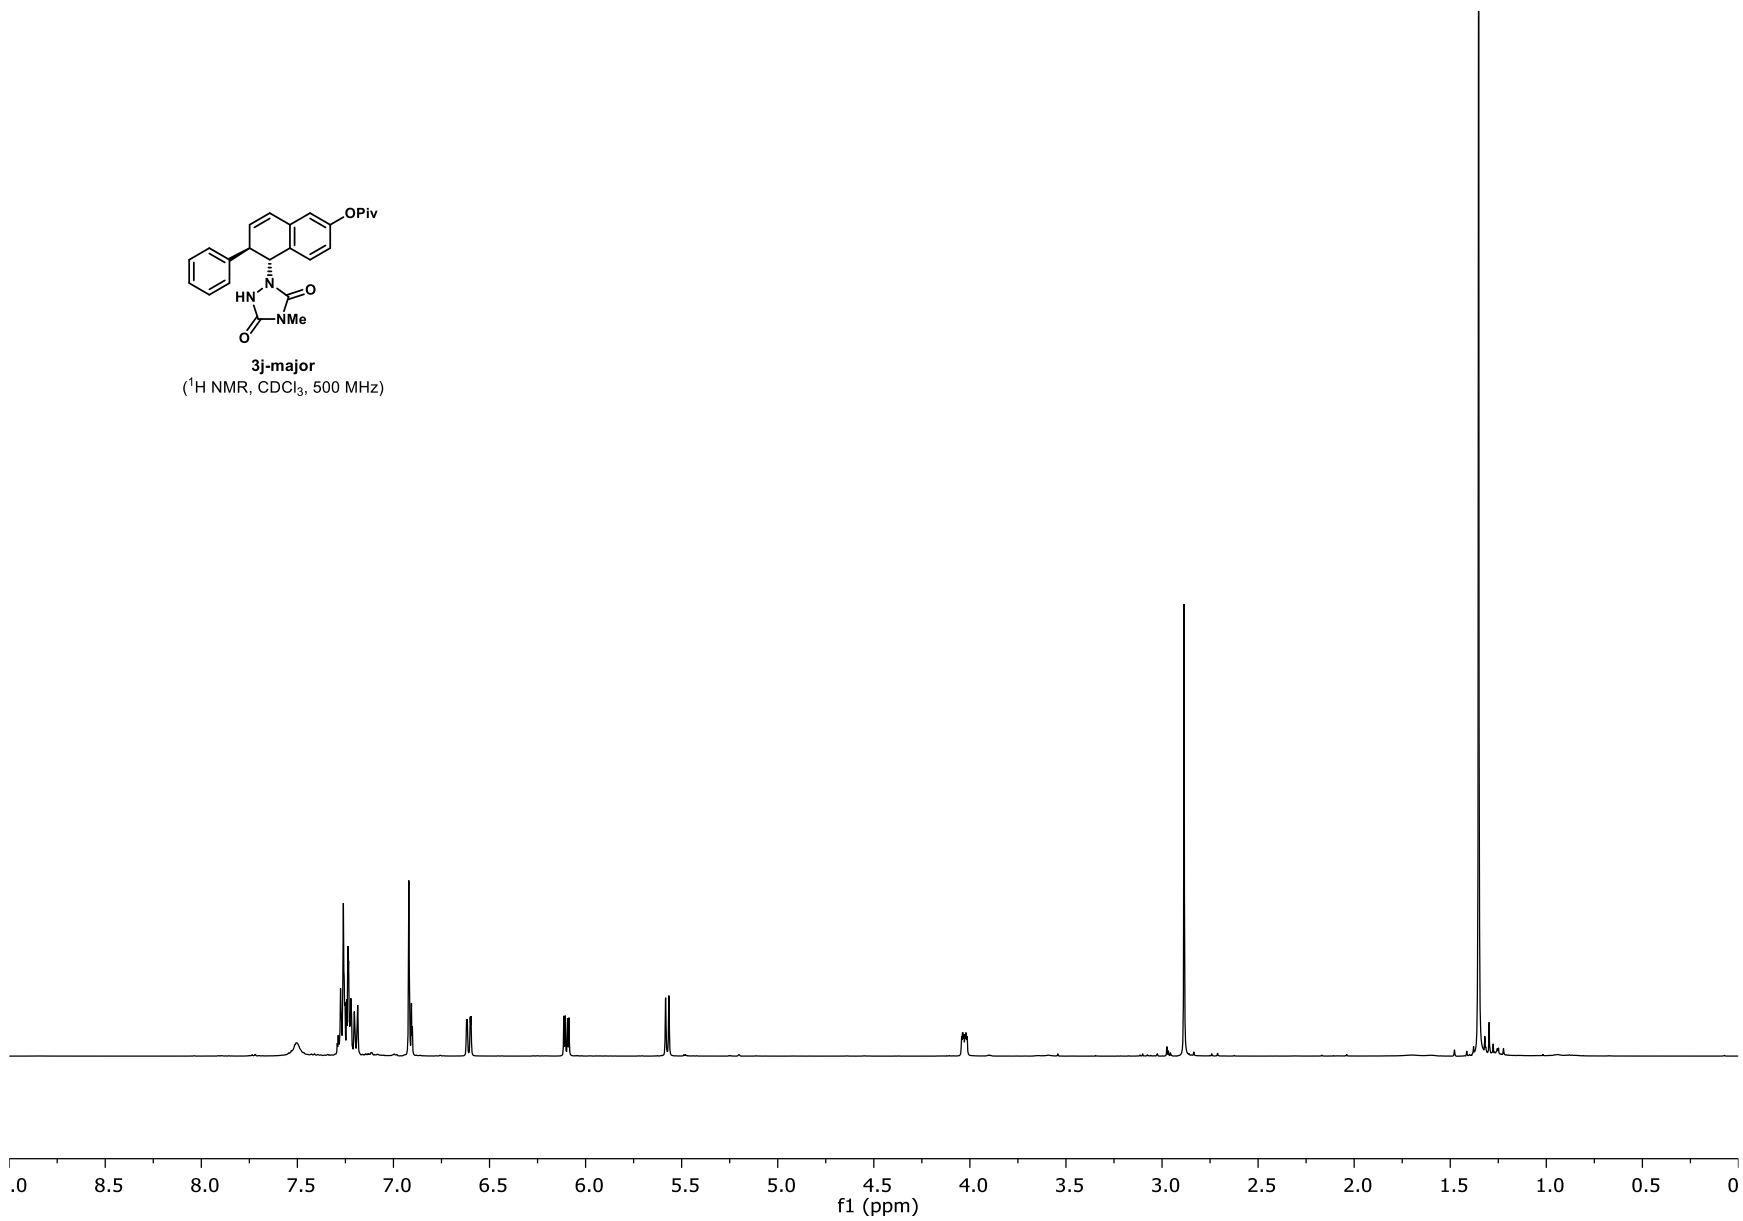

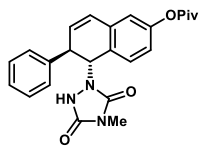

**3j-major**  
(<sup>13</sup>C NMR, CDCl<sub>3</sub>, 126 MHz)

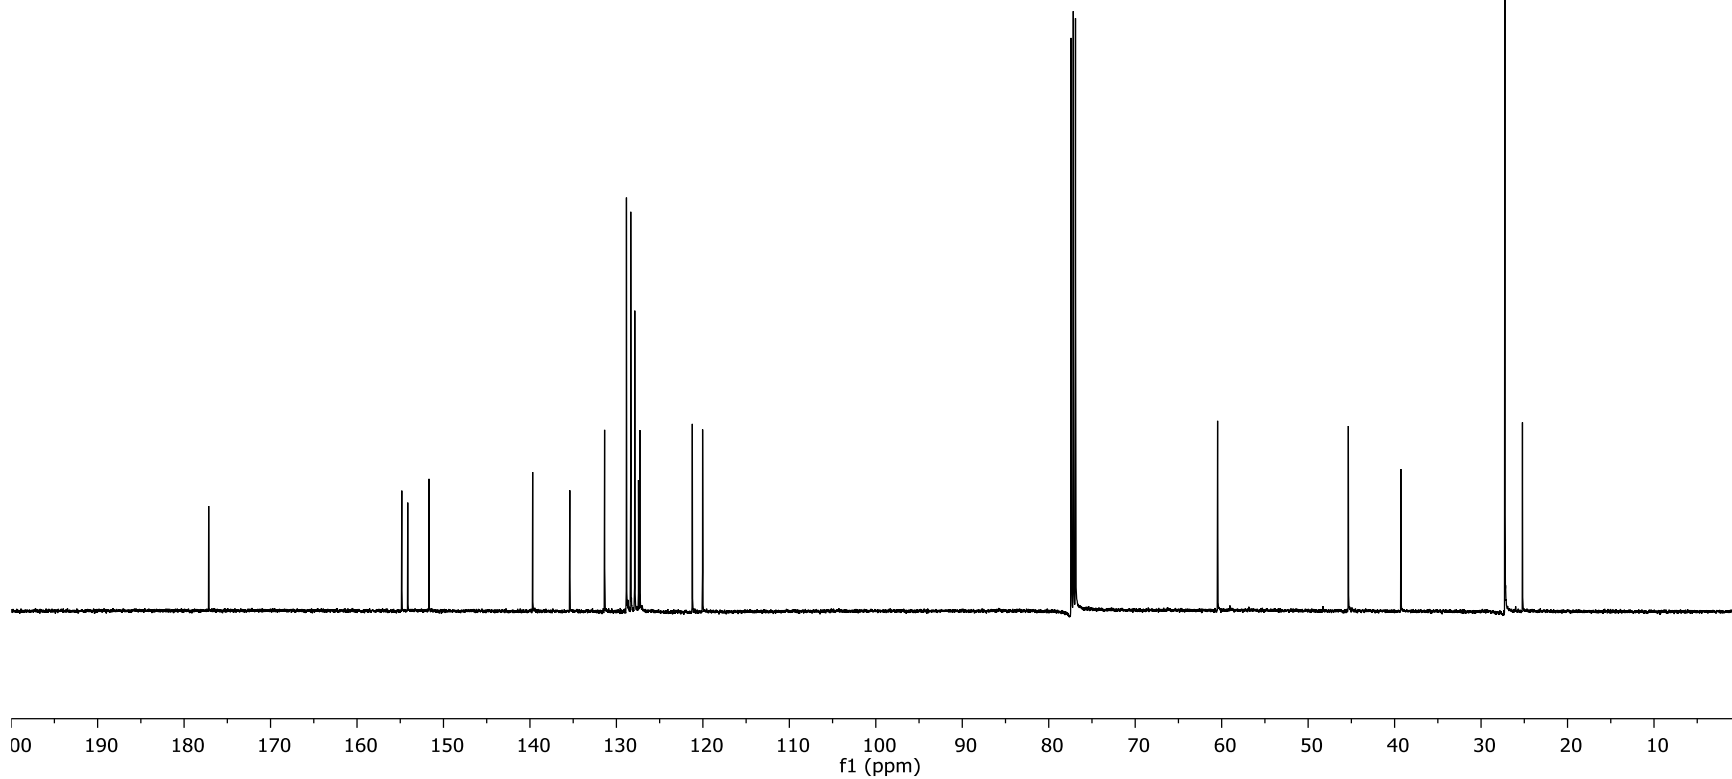



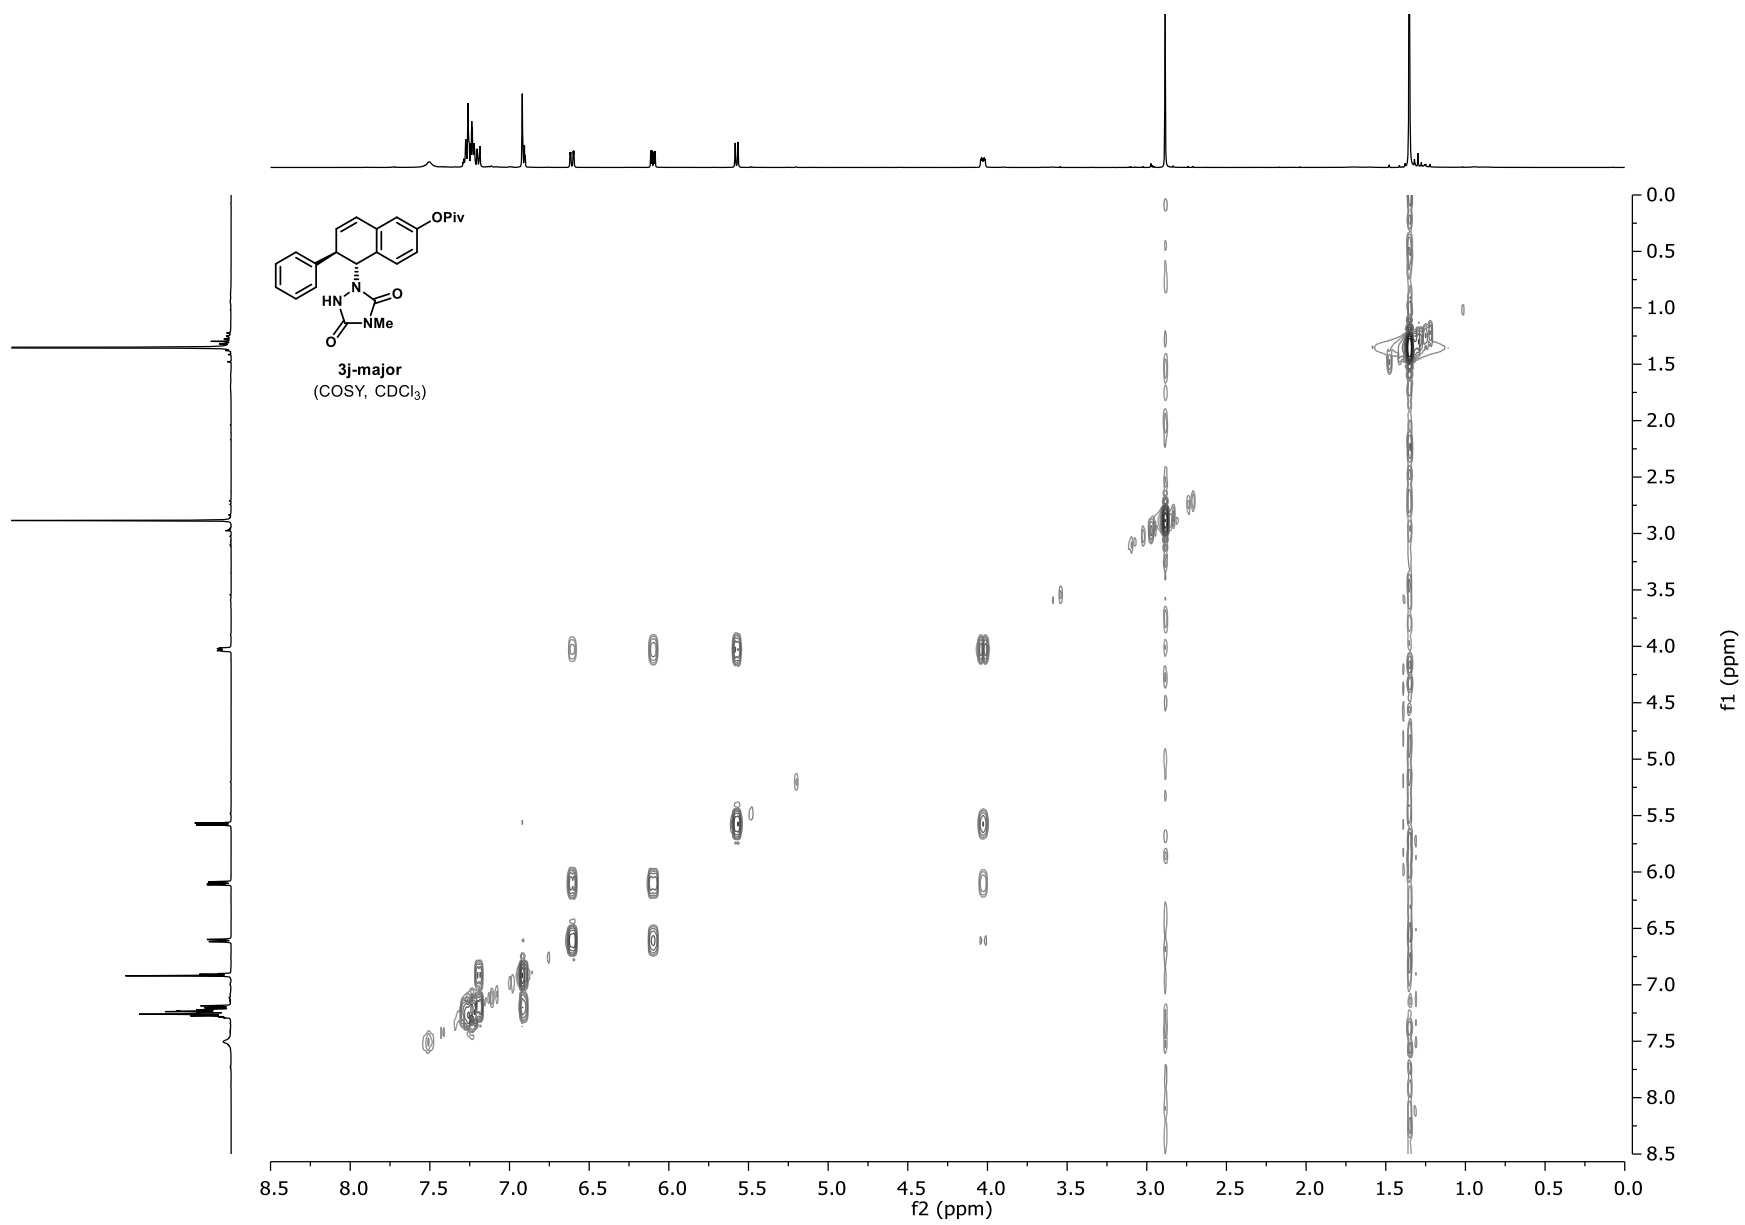

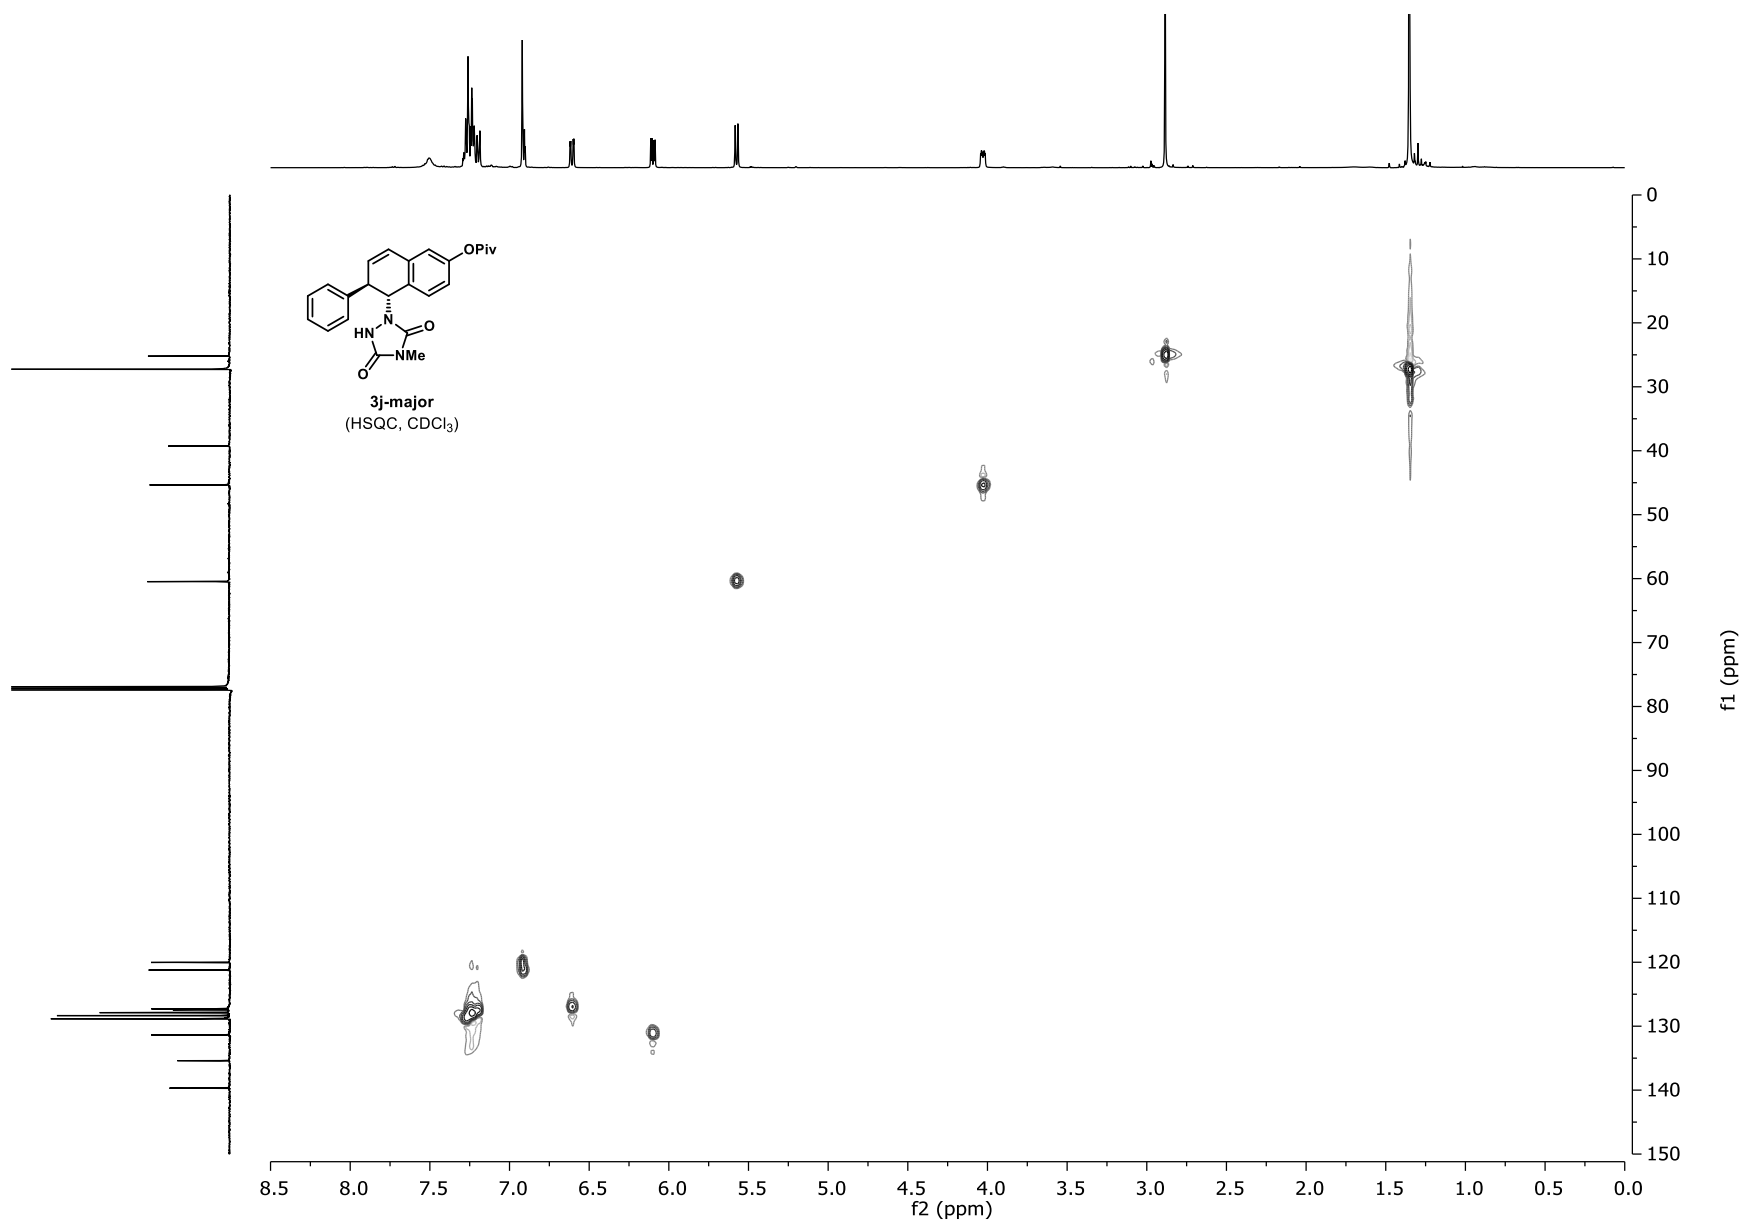

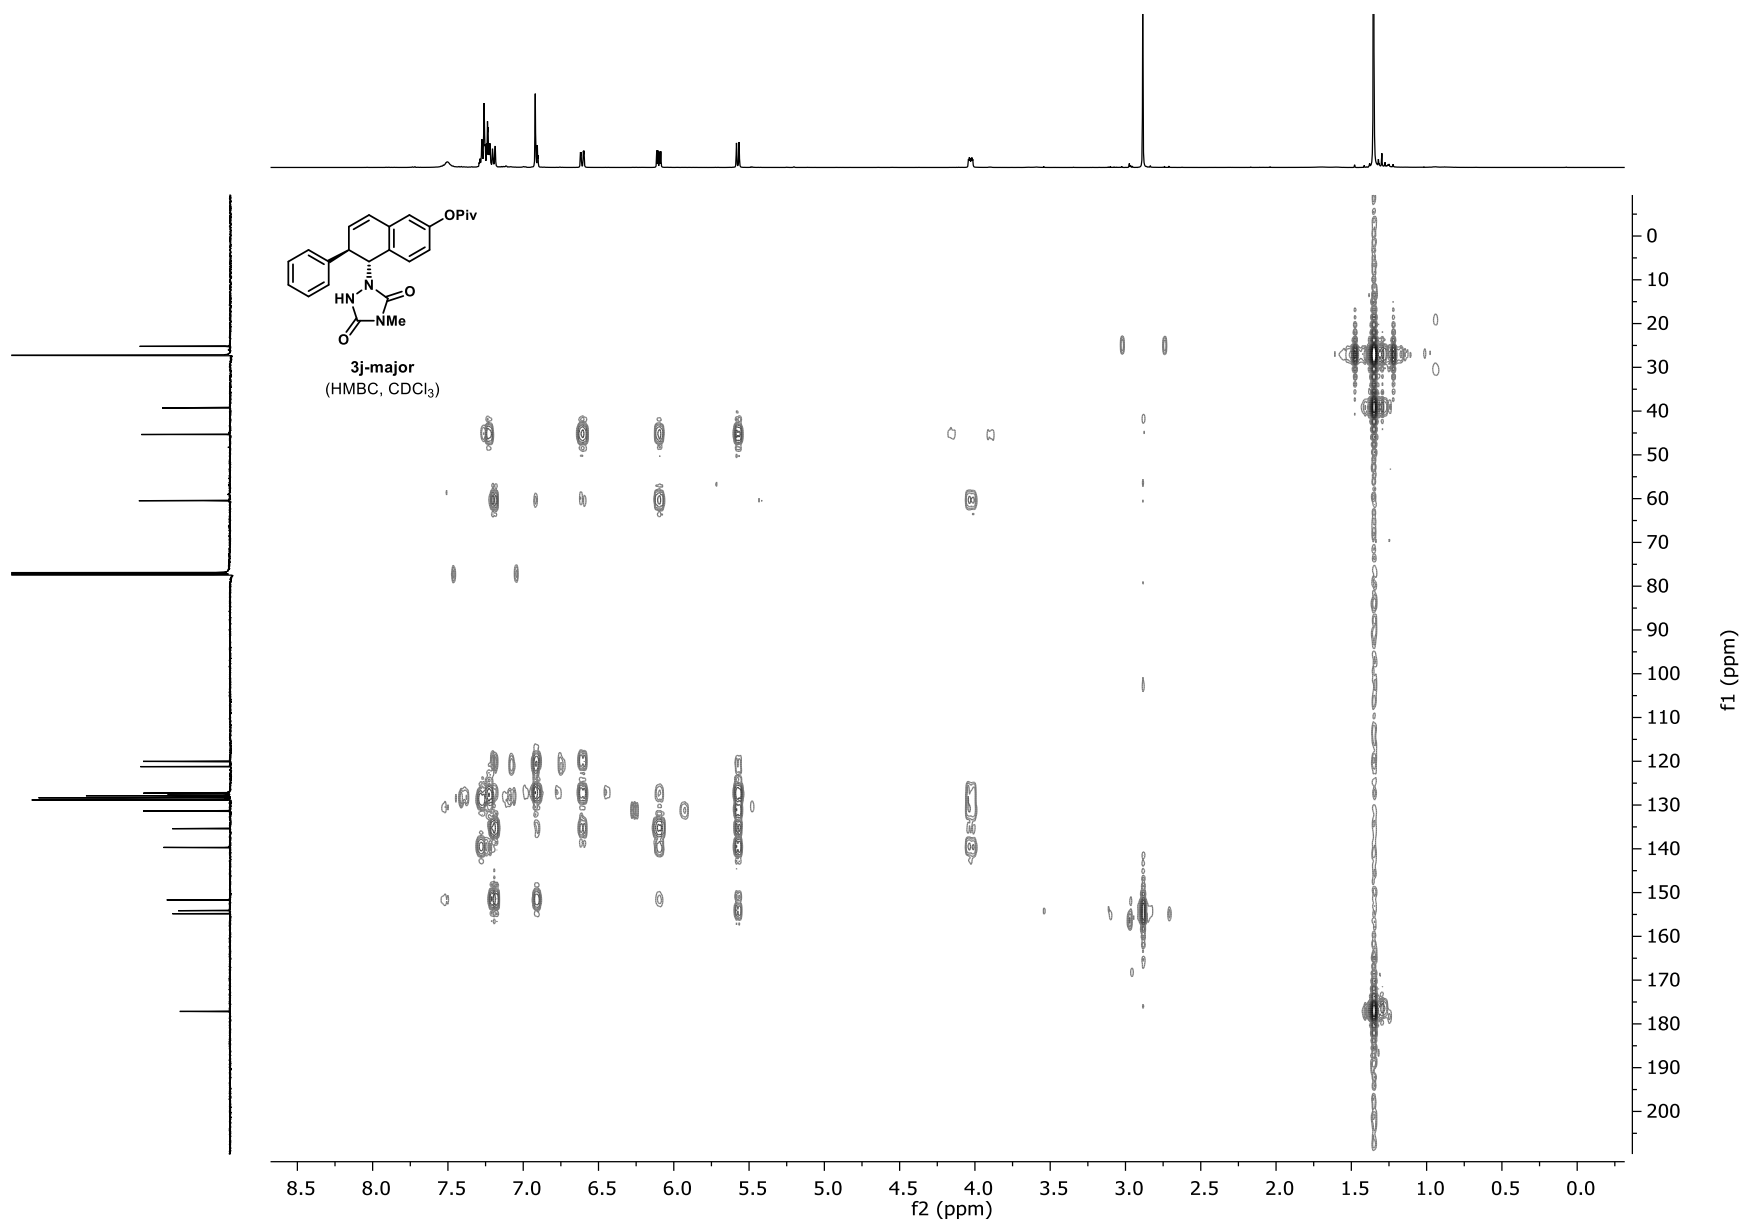

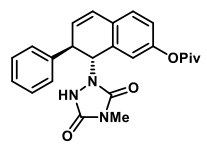

**3j-minor**  
(<sup>1</sup>H NMR, CDCl<sub>3</sub>, 500 MHz)

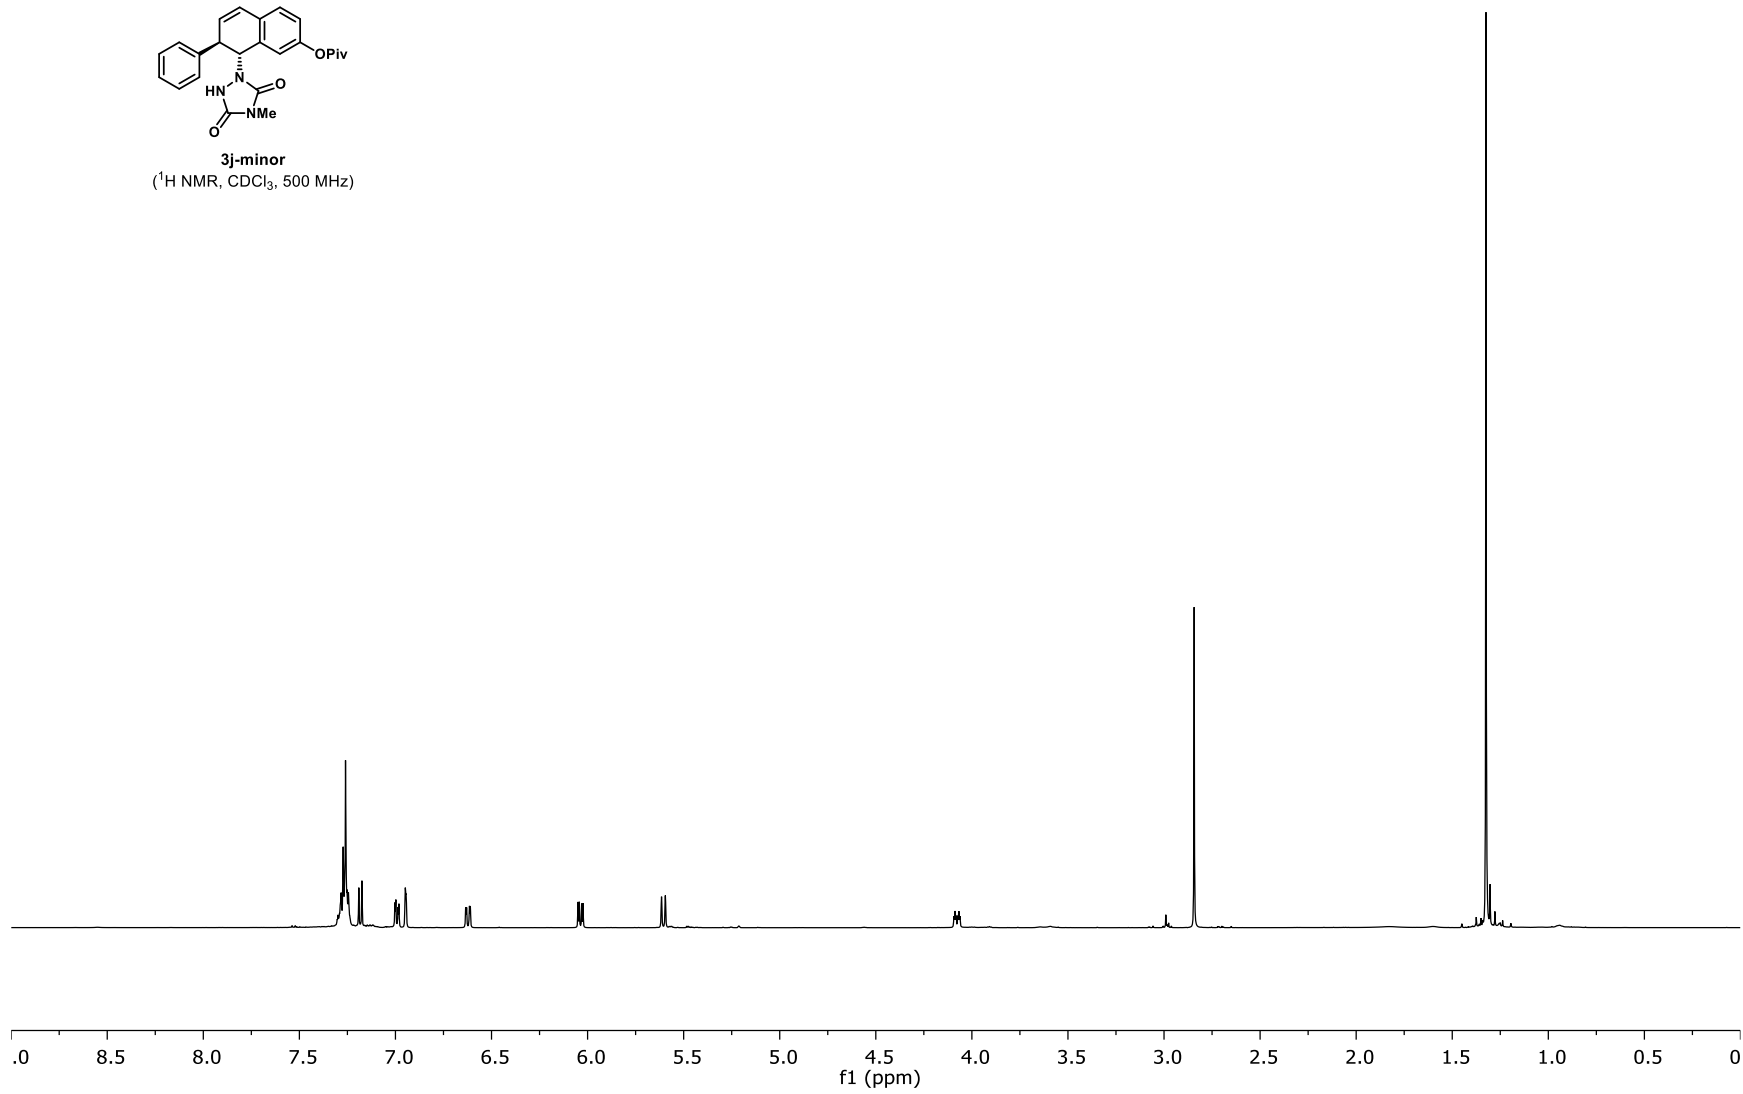

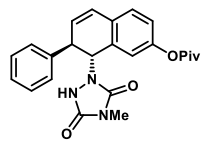

**3j-minor**

(<sup>13</sup>C NMR, CDCl<sub>3</sub>, 126 MHz)

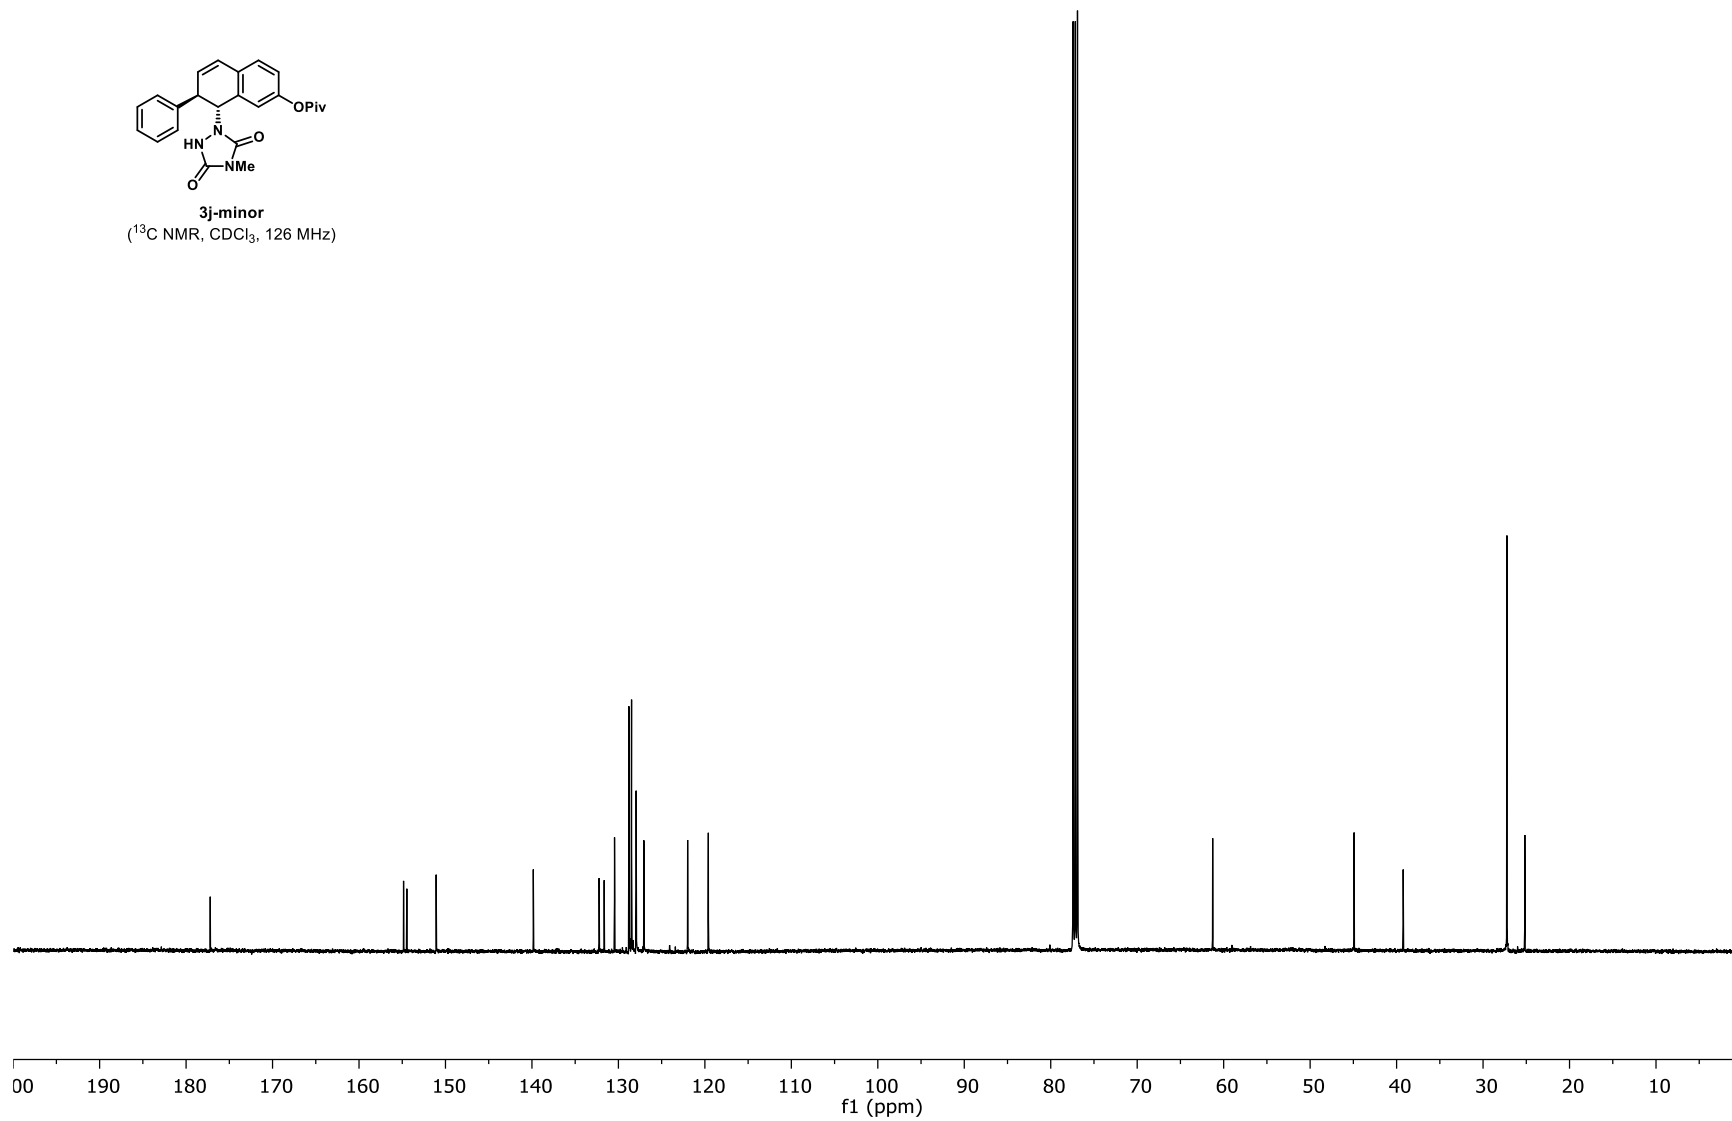

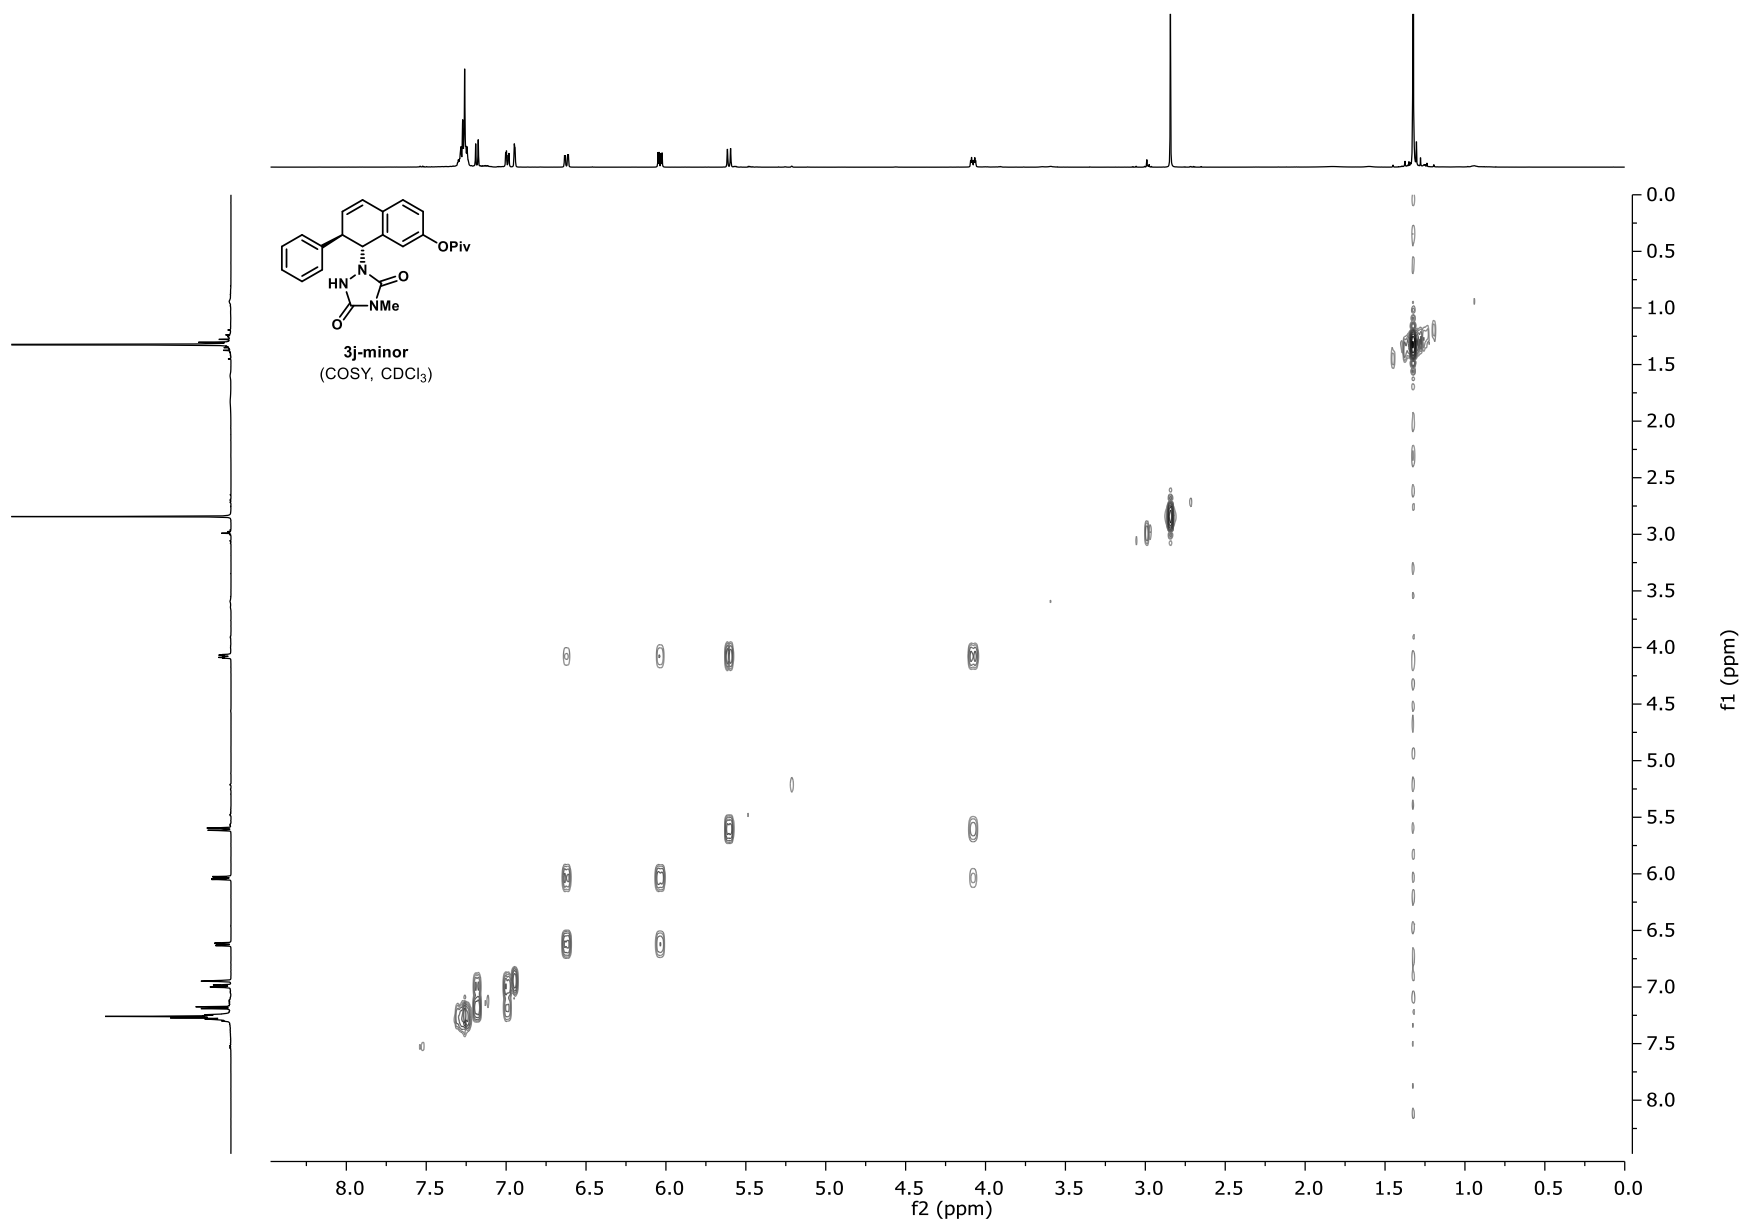

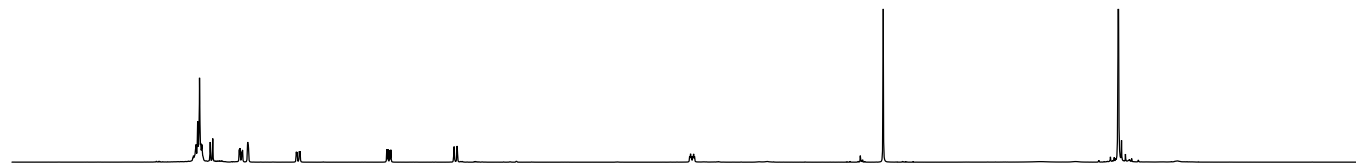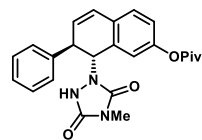

3j-minor  
(HSQC, CDCl<sub>3</sub>)

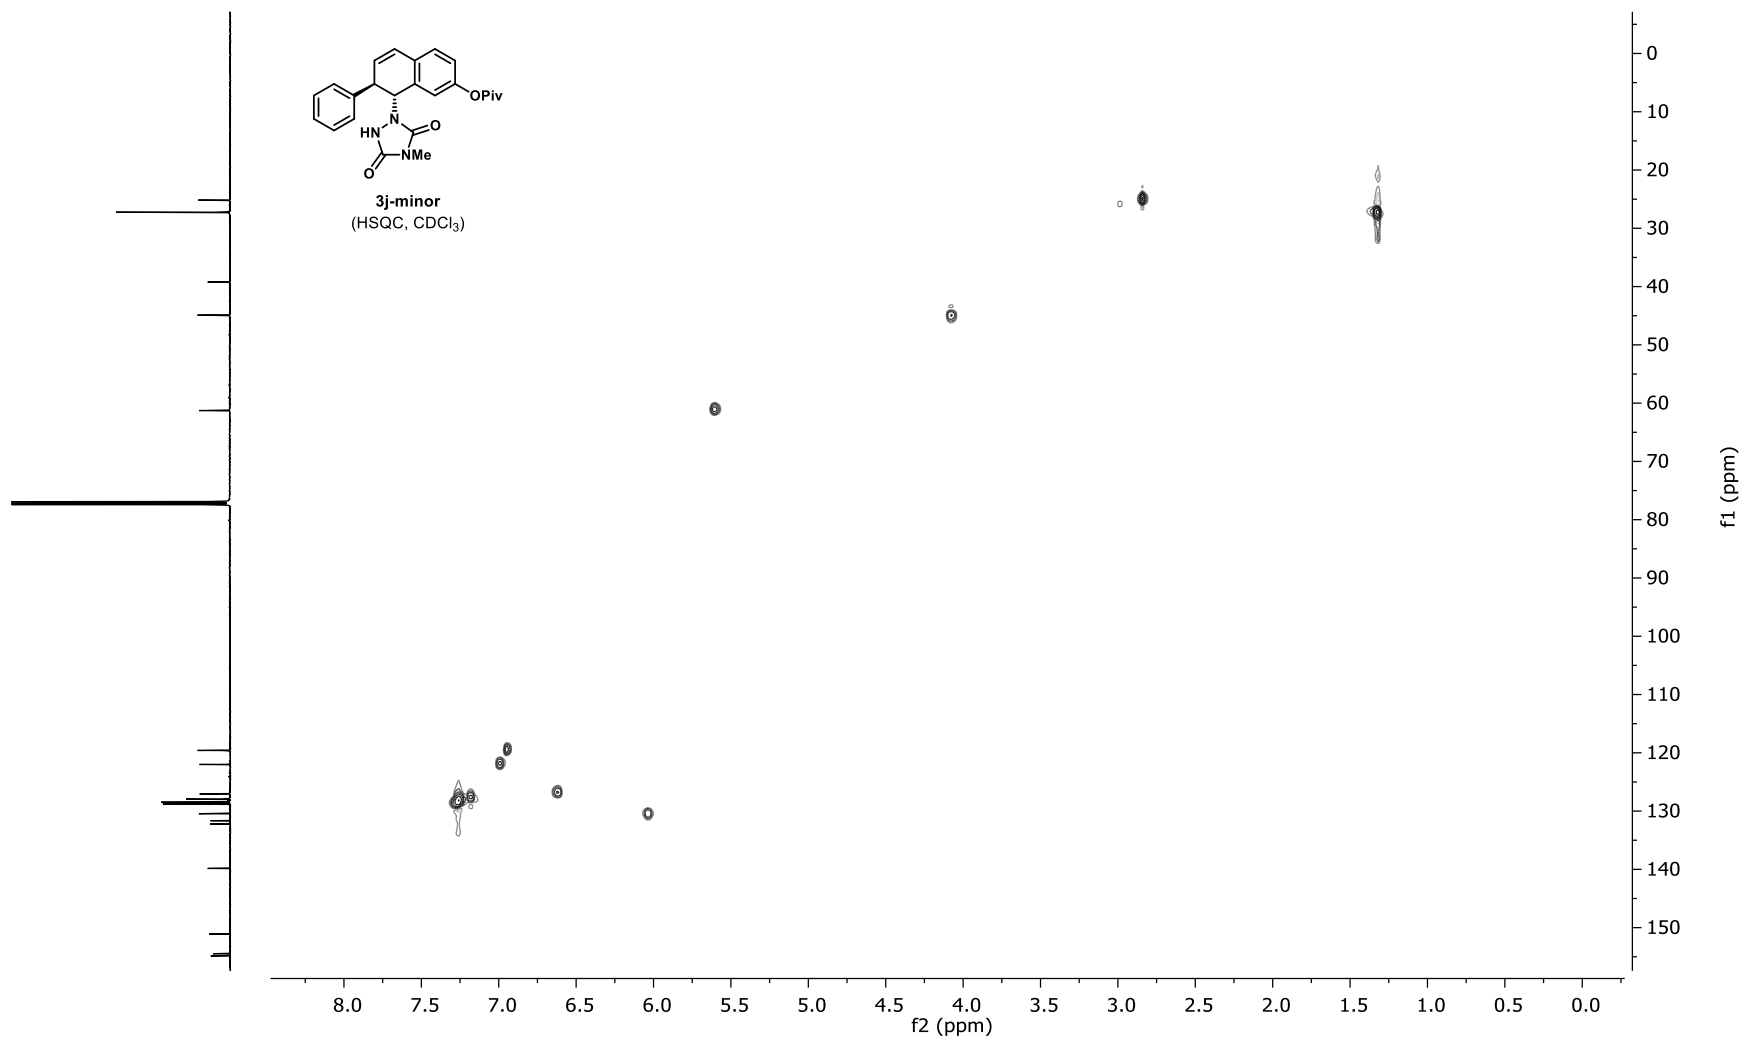

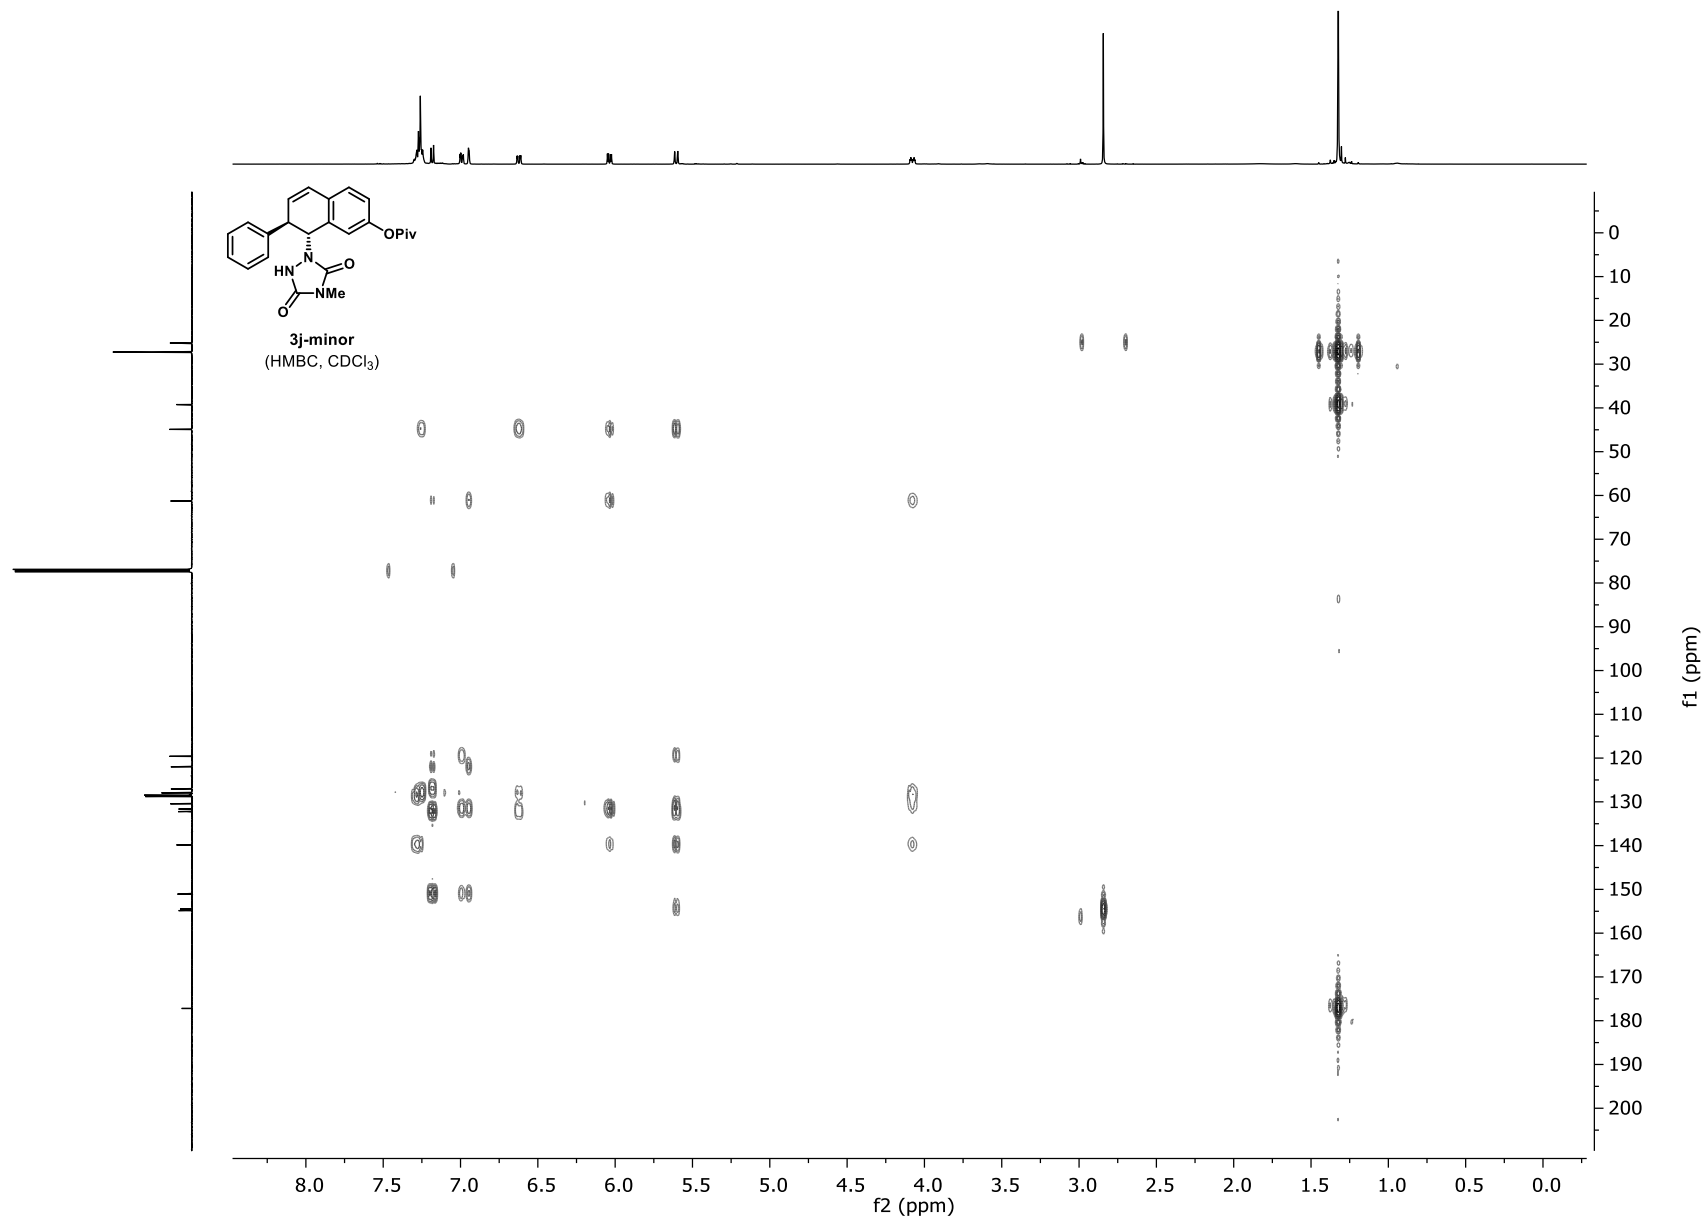



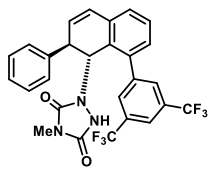

3k  
(<sup>1</sup>H NMR, CDCl<sub>3</sub>, 500 MHz)

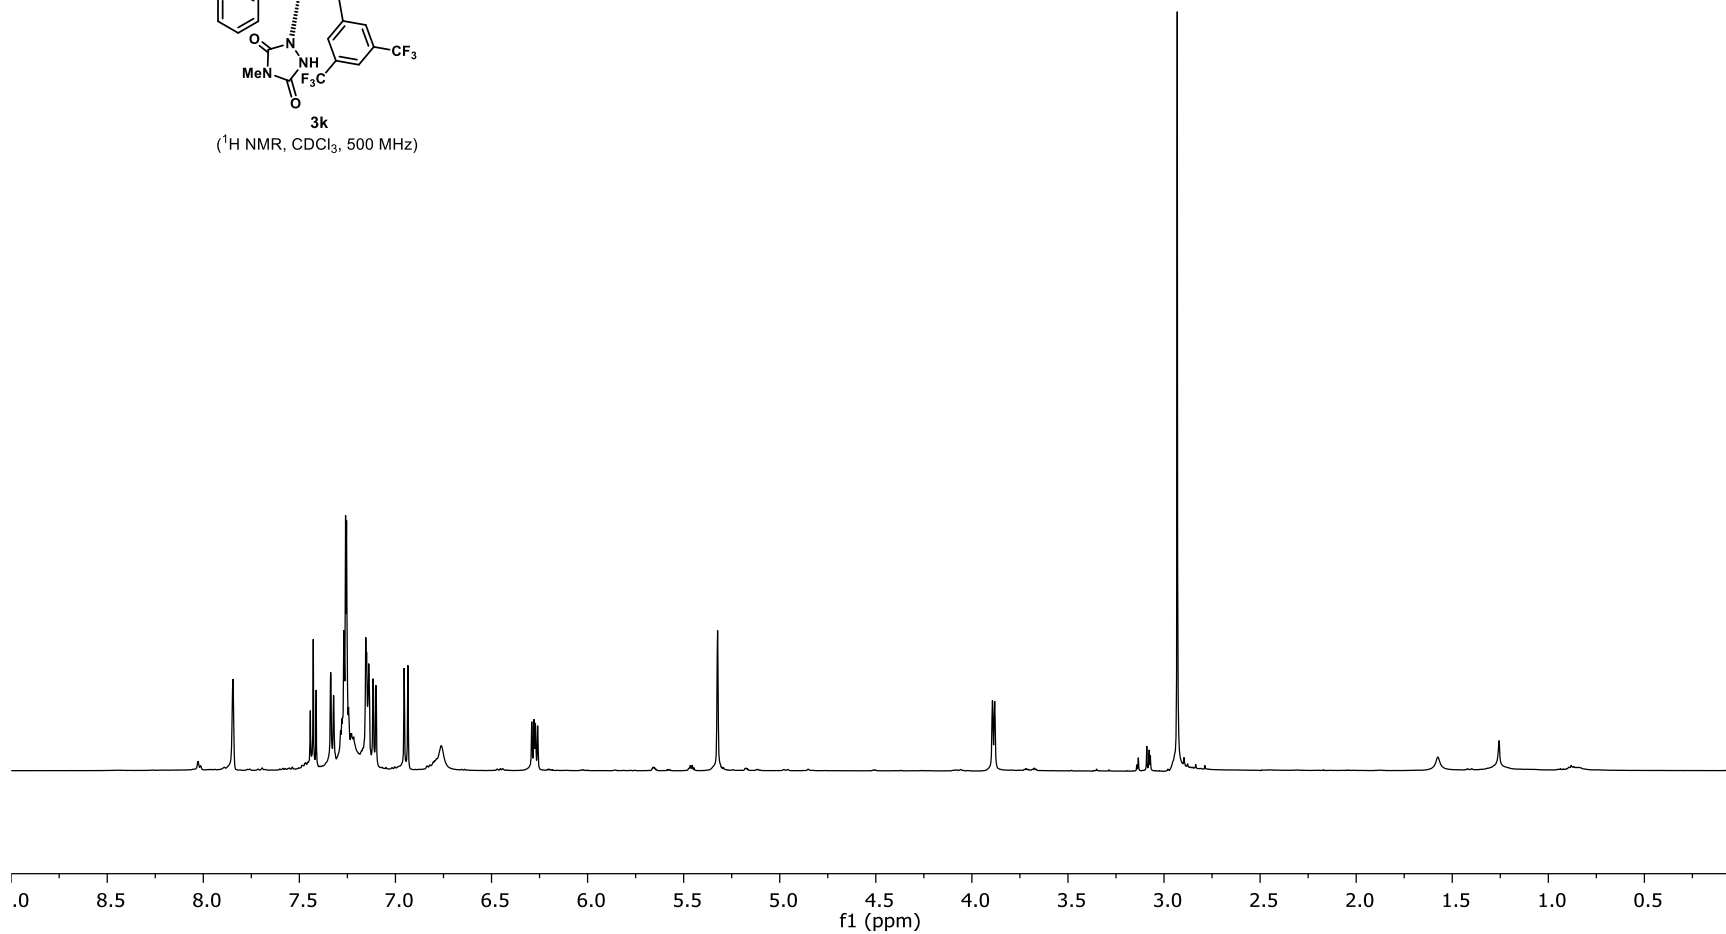

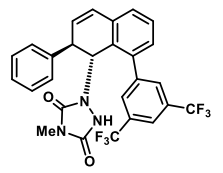

3k  
(<sup>13</sup>C NMR, CDCl<sub>3</sub>, 126 MHz)

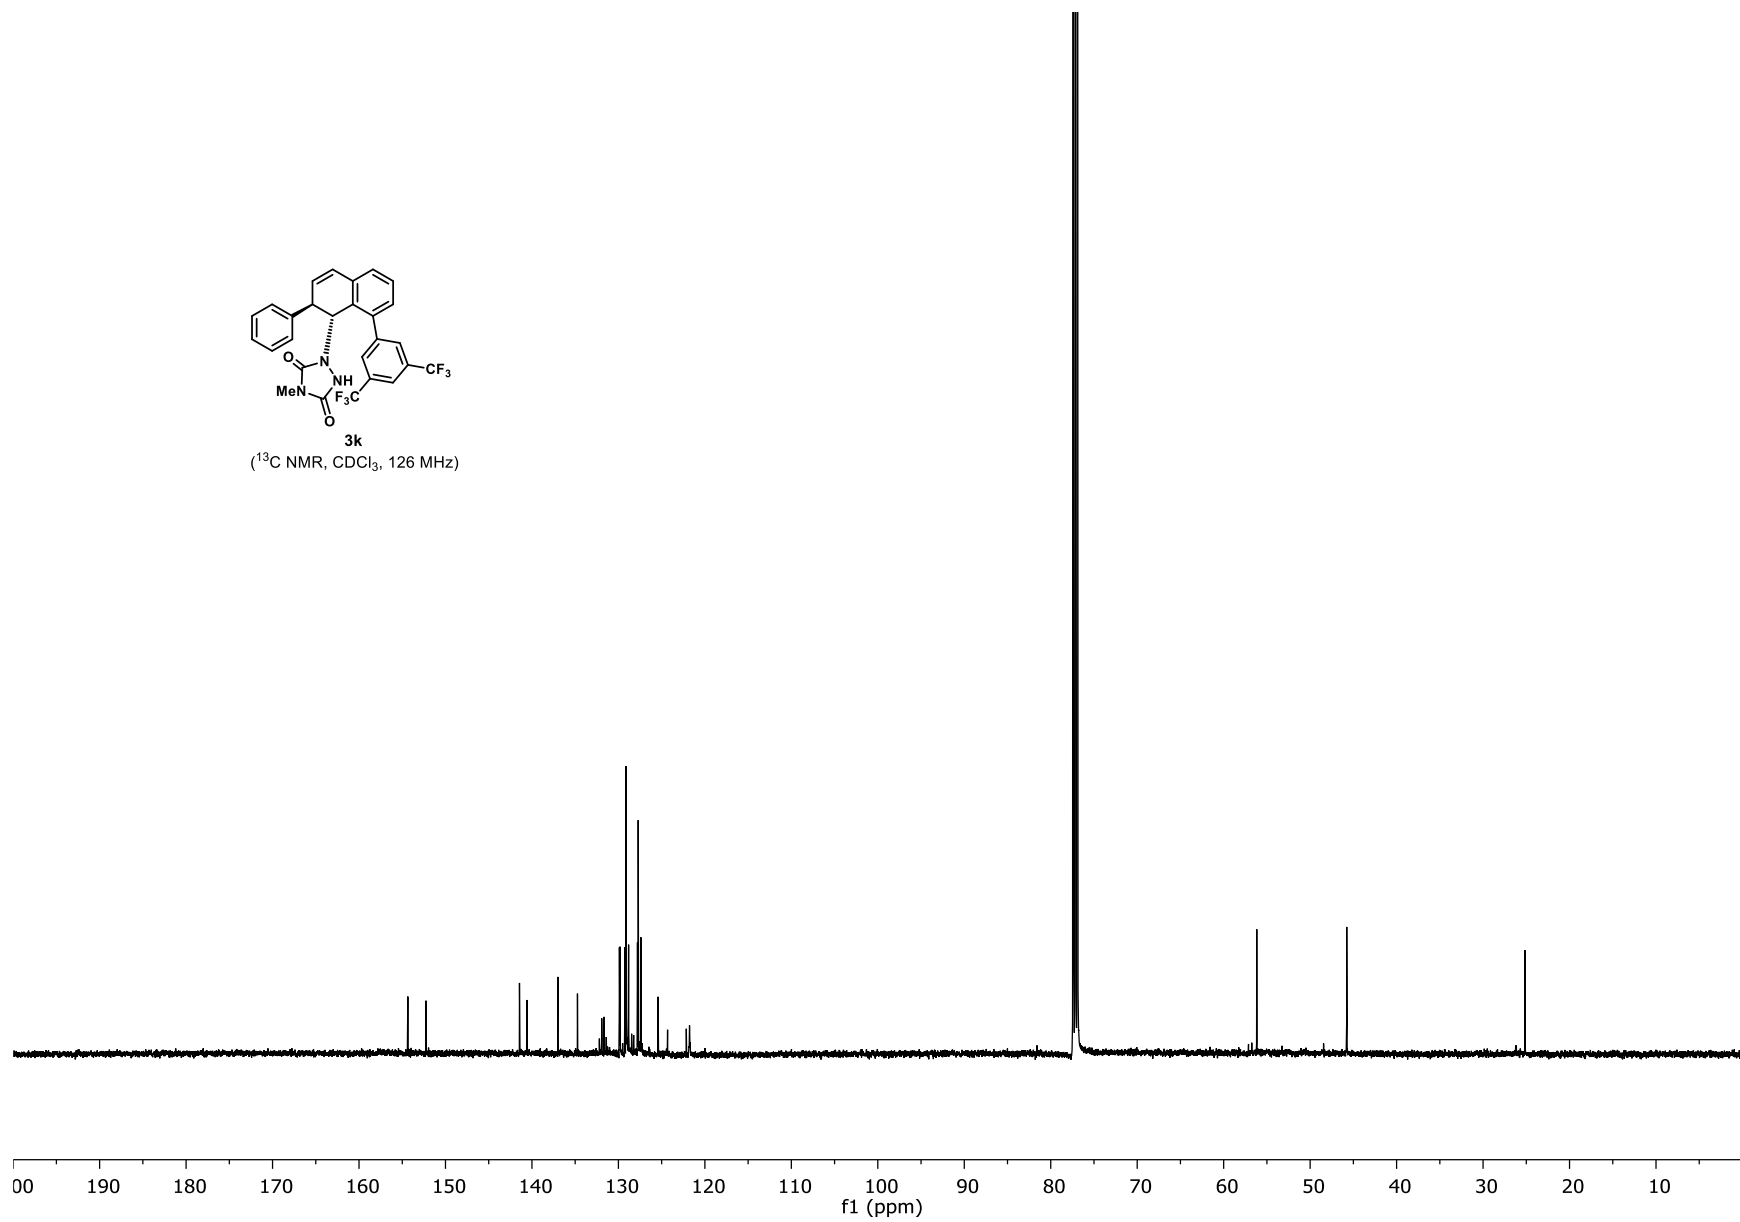

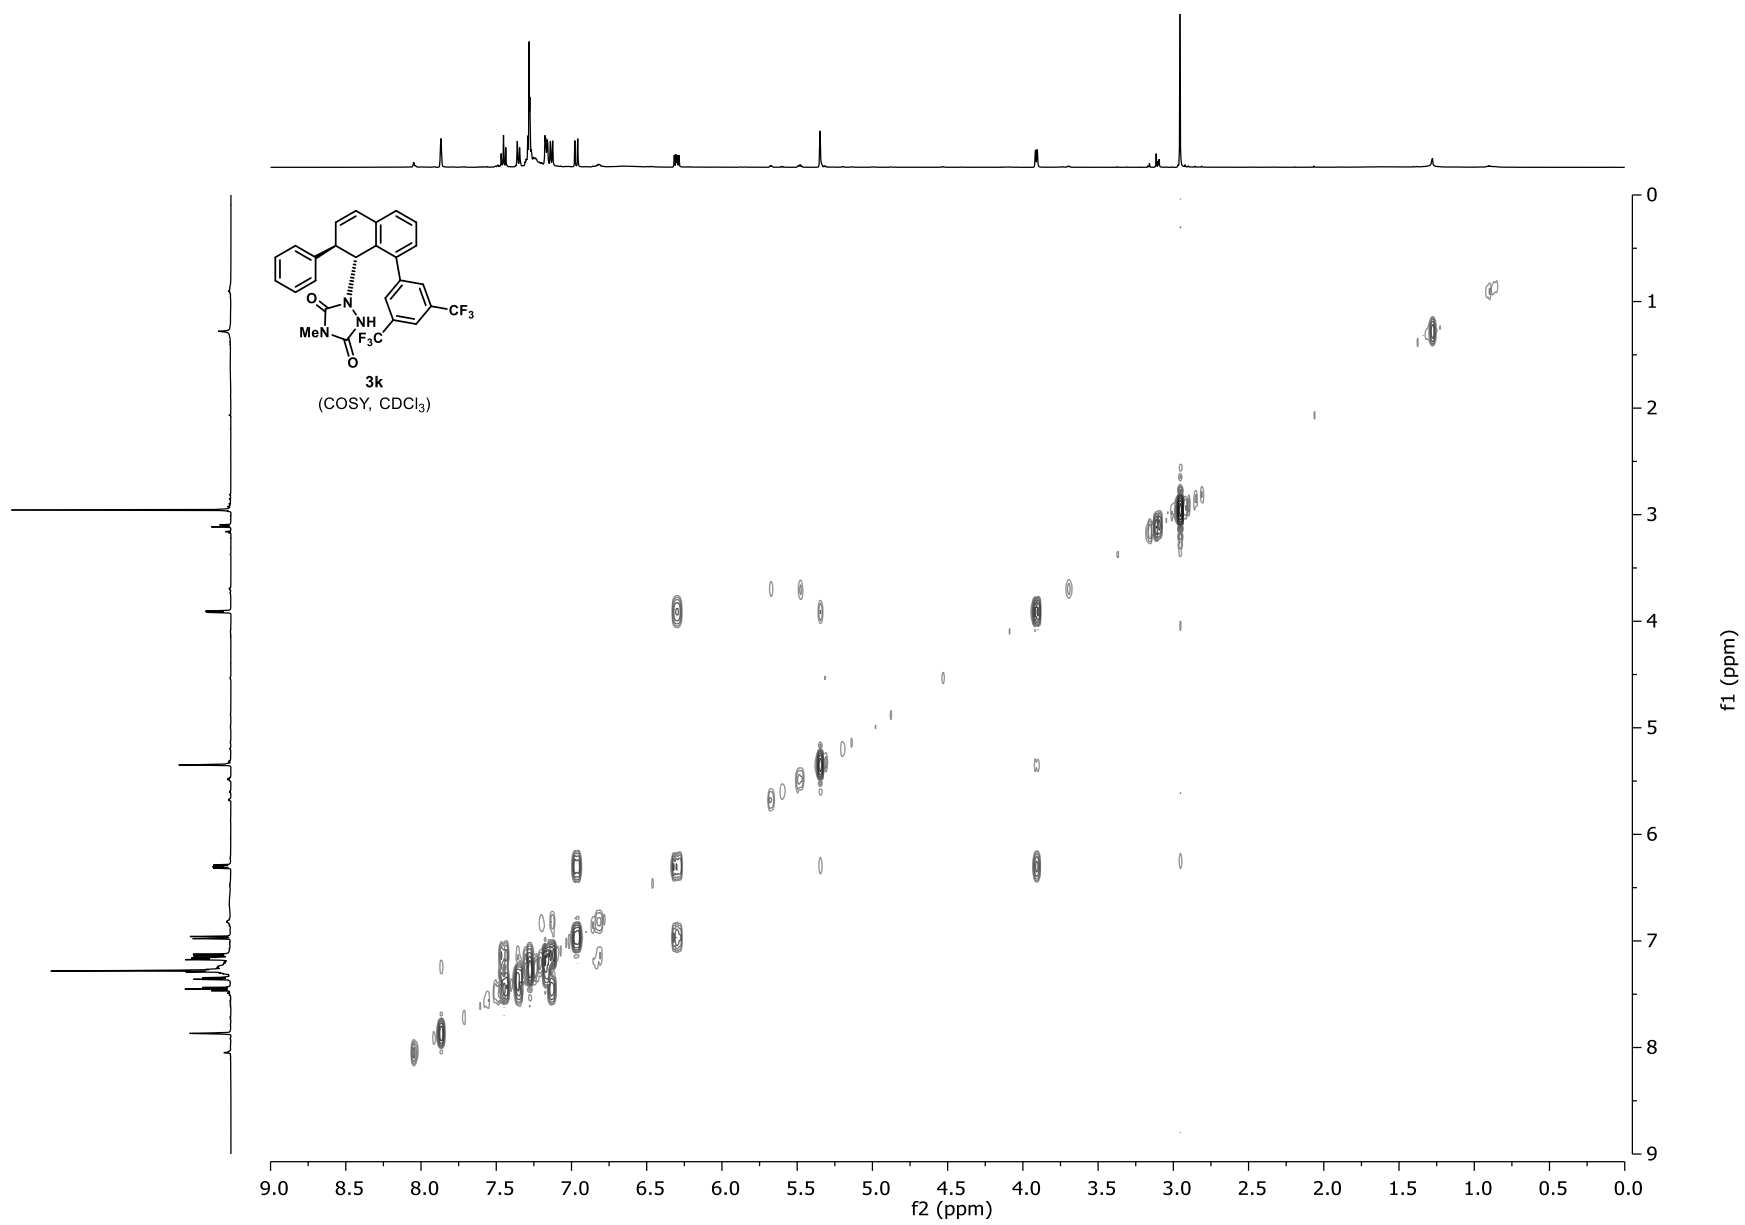

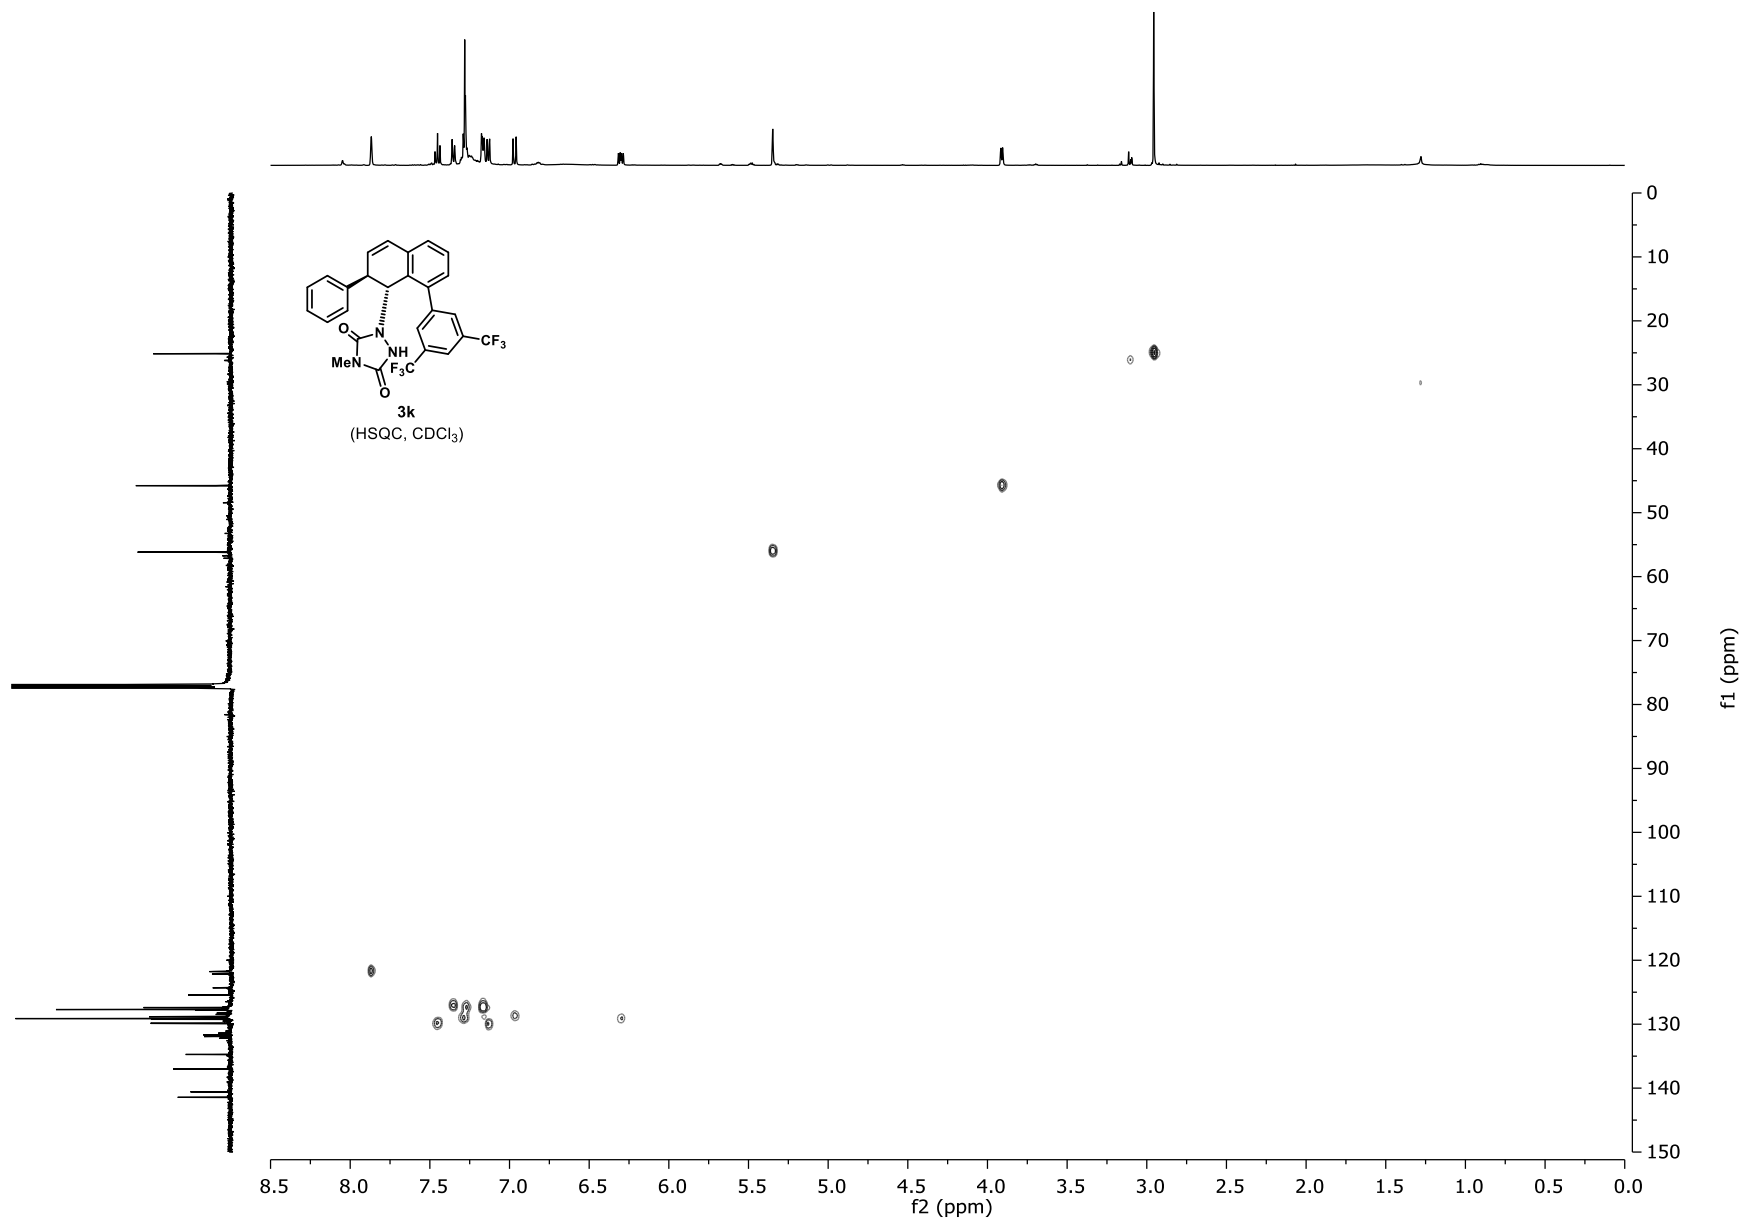

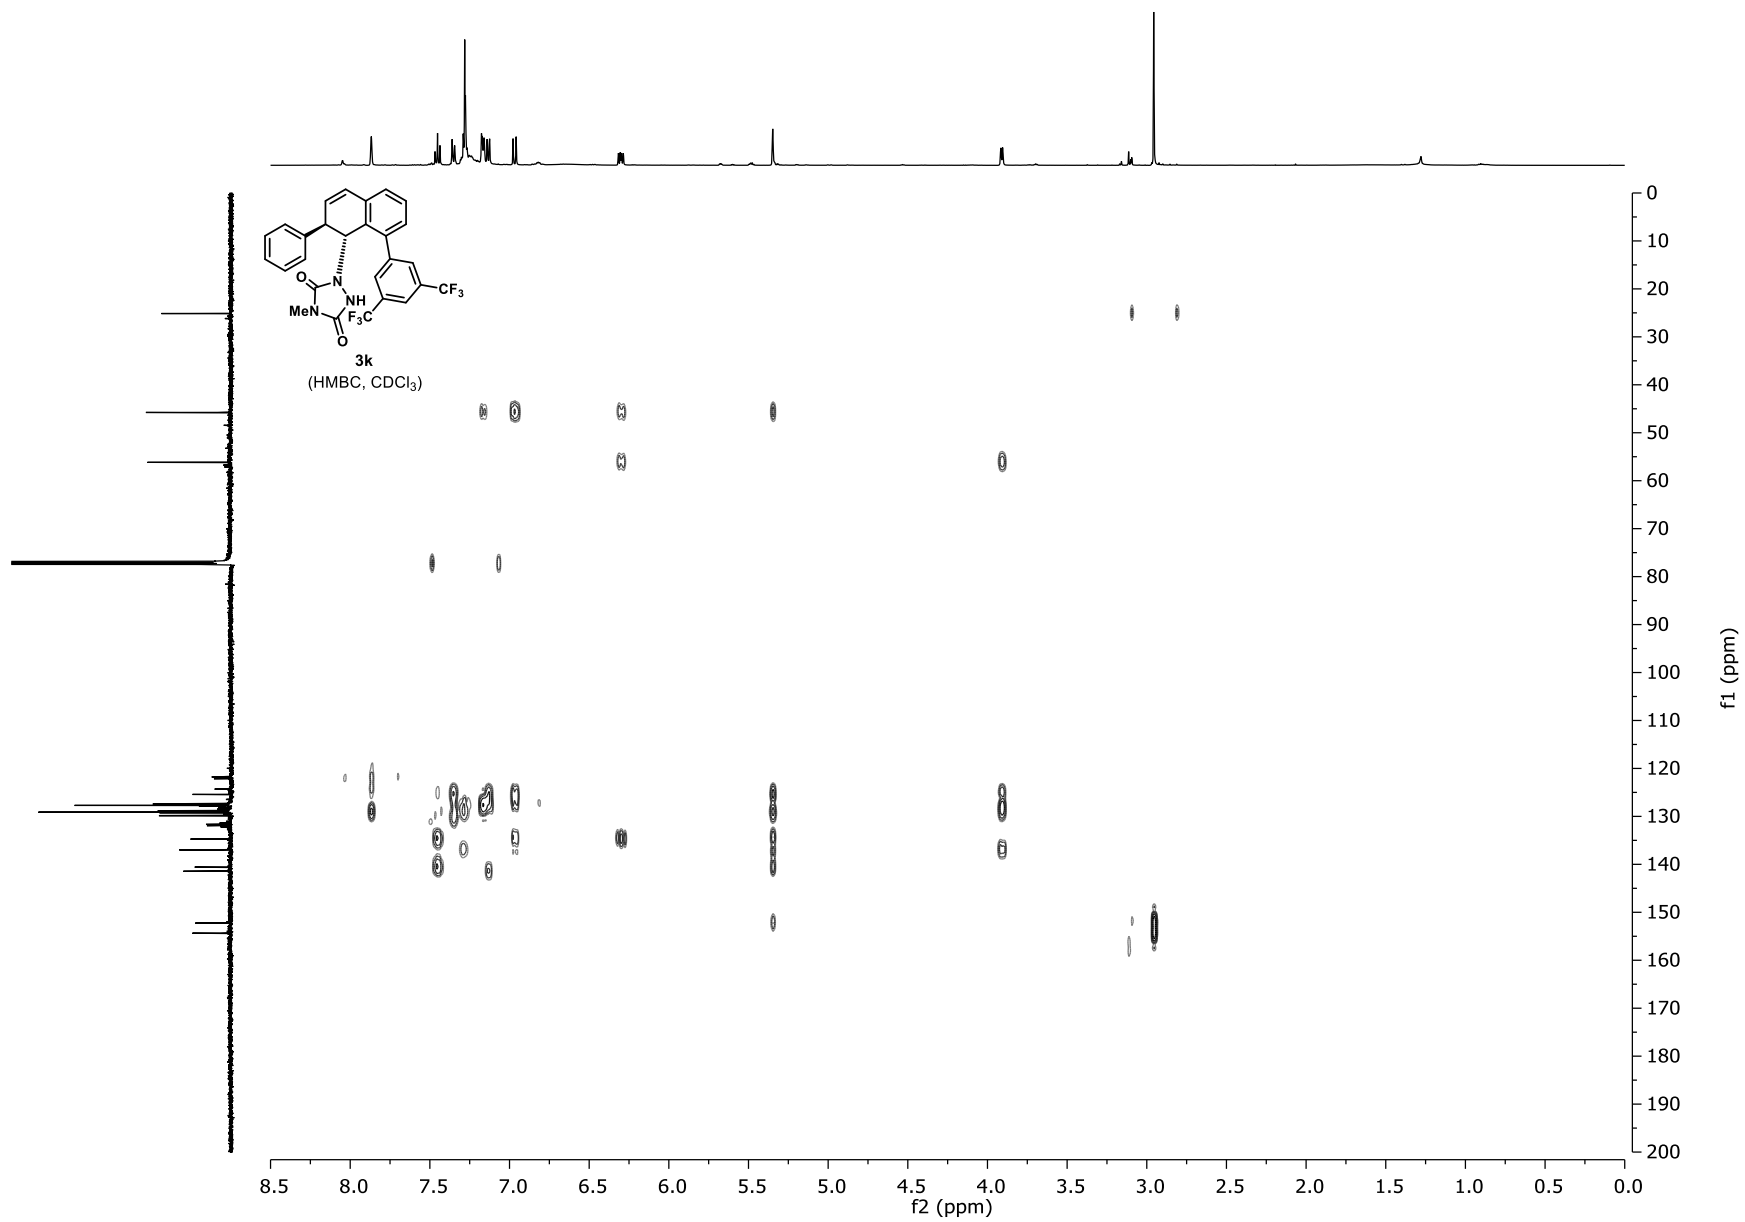

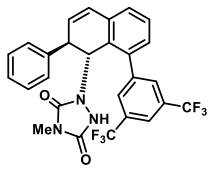

(<sup>19</sup>F NMR, CDCl<sub>3</sub>, 471 MHz)

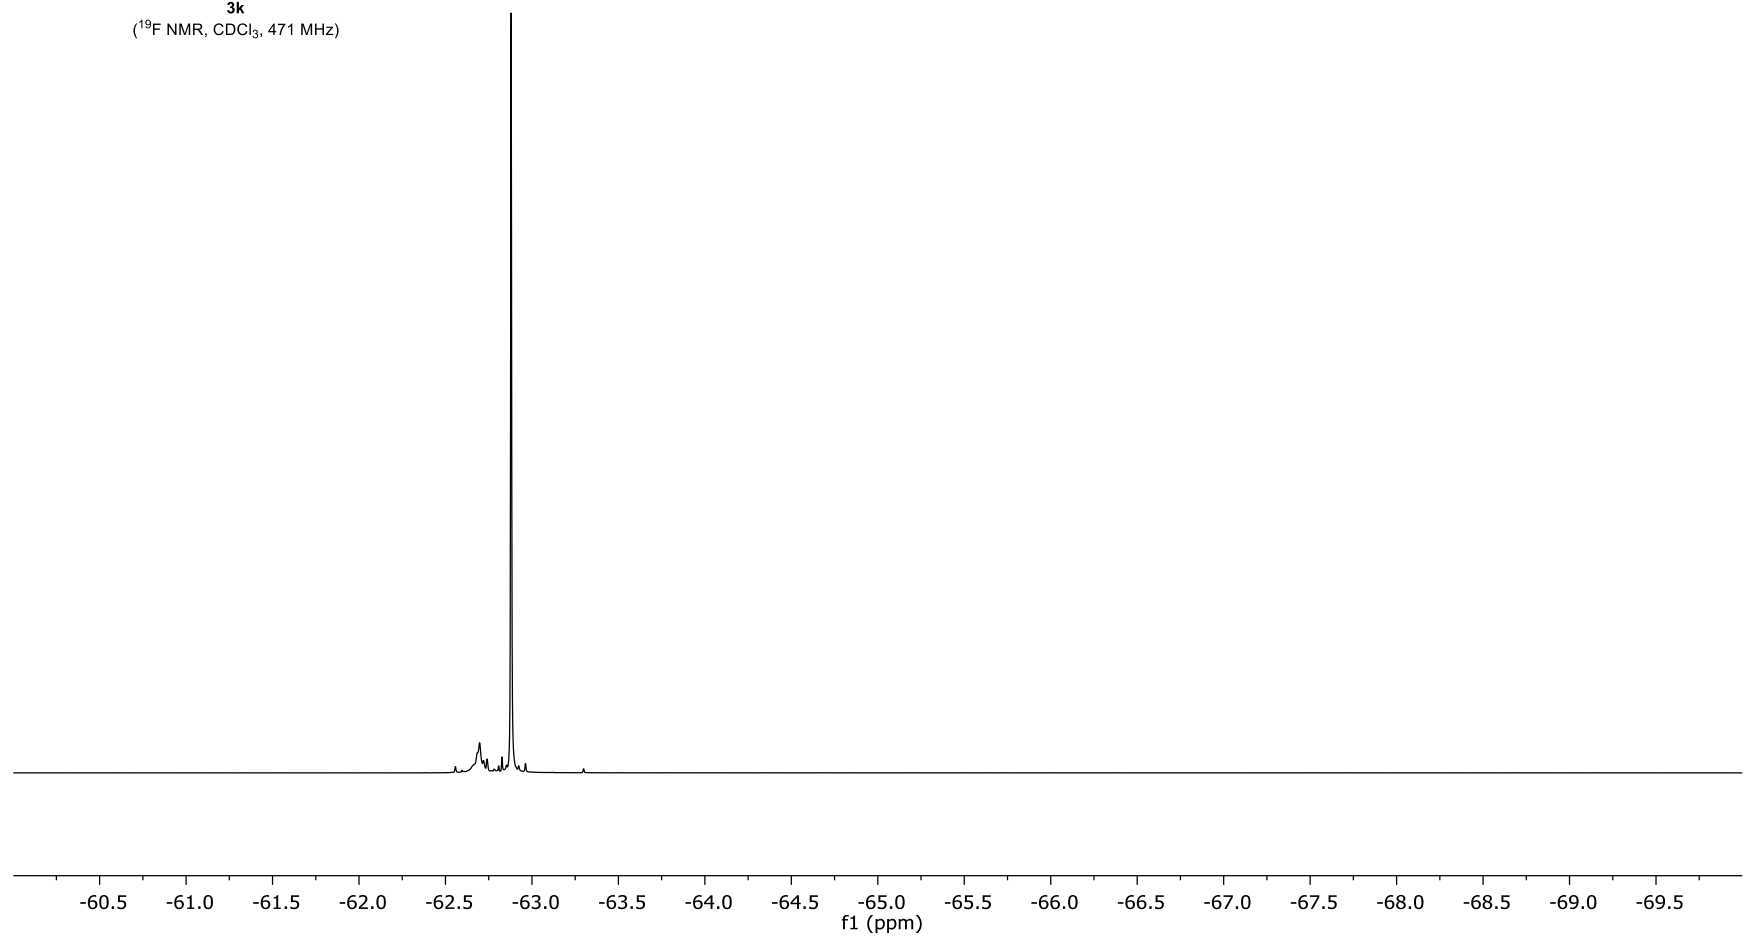

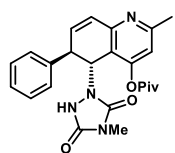

3I  
(<sup>1</sup>H NMR, CDCl<sub>3</sub>, 500 MHz)

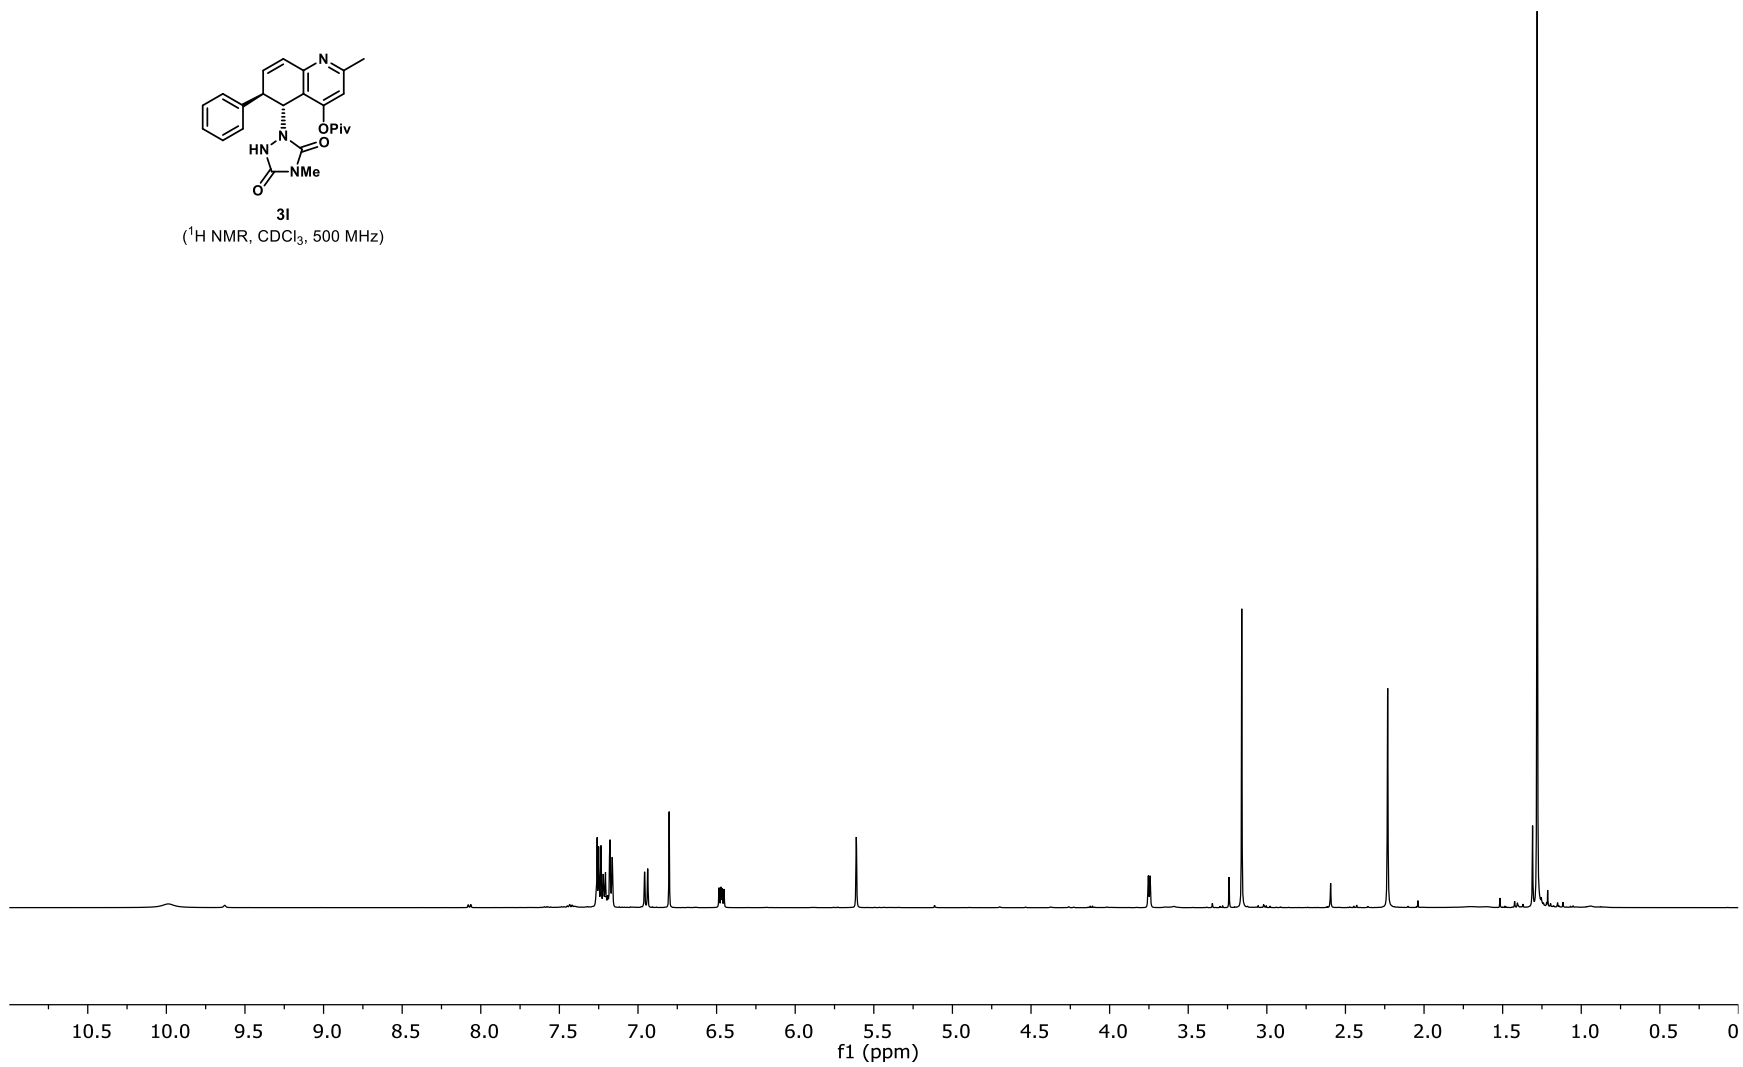

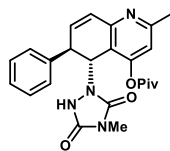

3I

(<sup>13</sup>C NMR, CDCl<sub>3</sub>, 126 MHz)

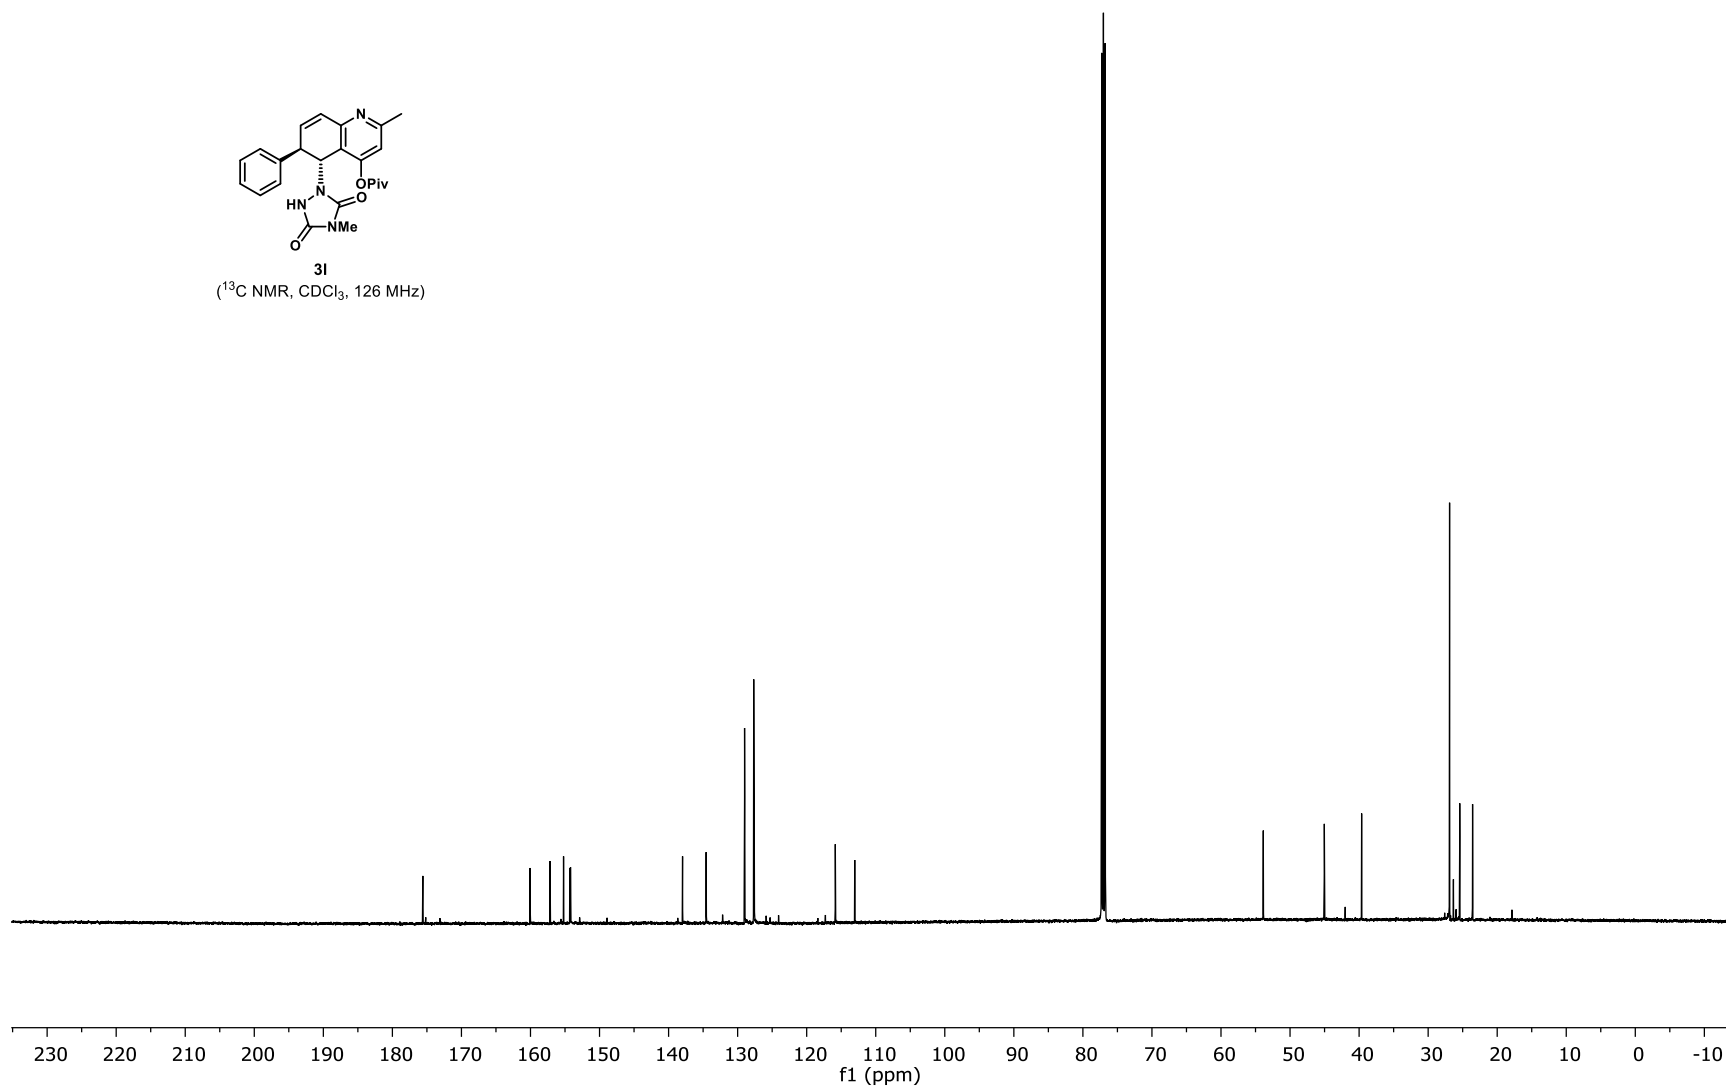



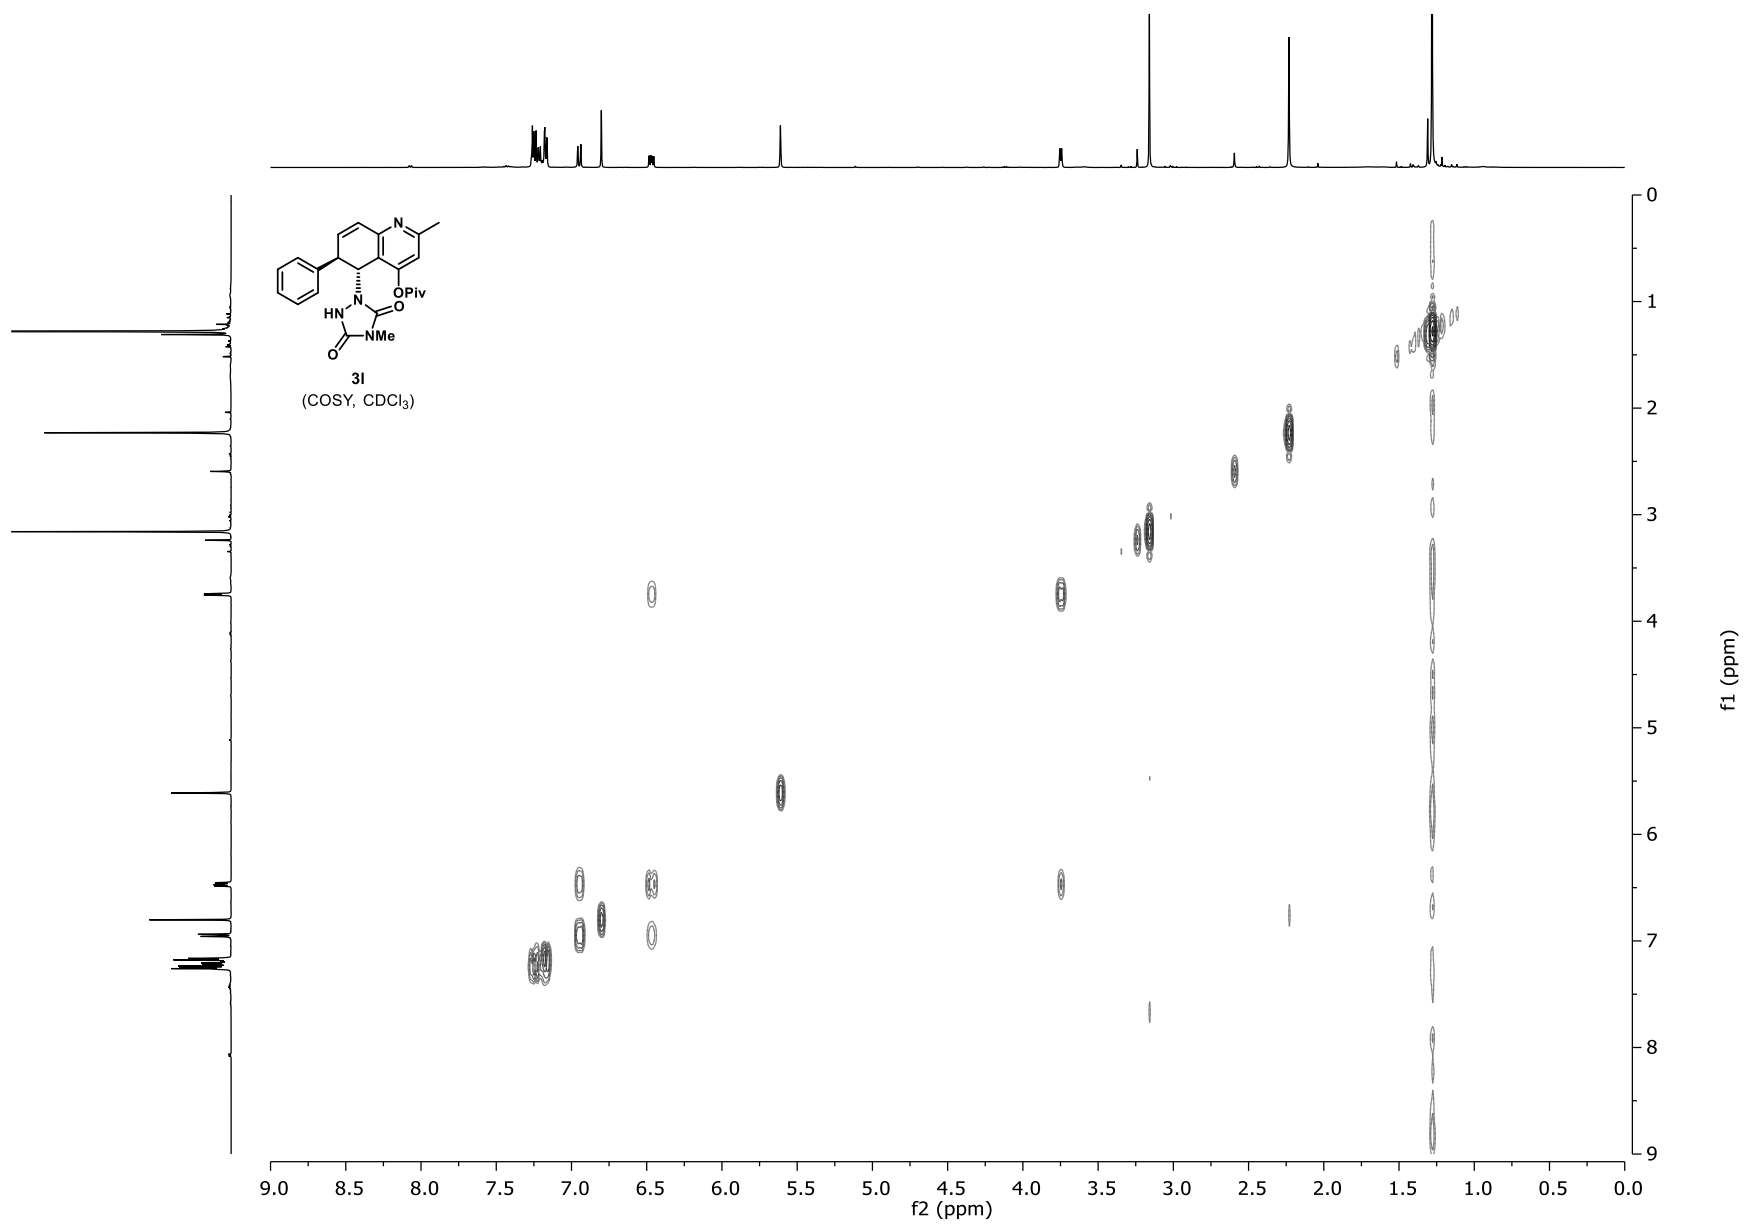

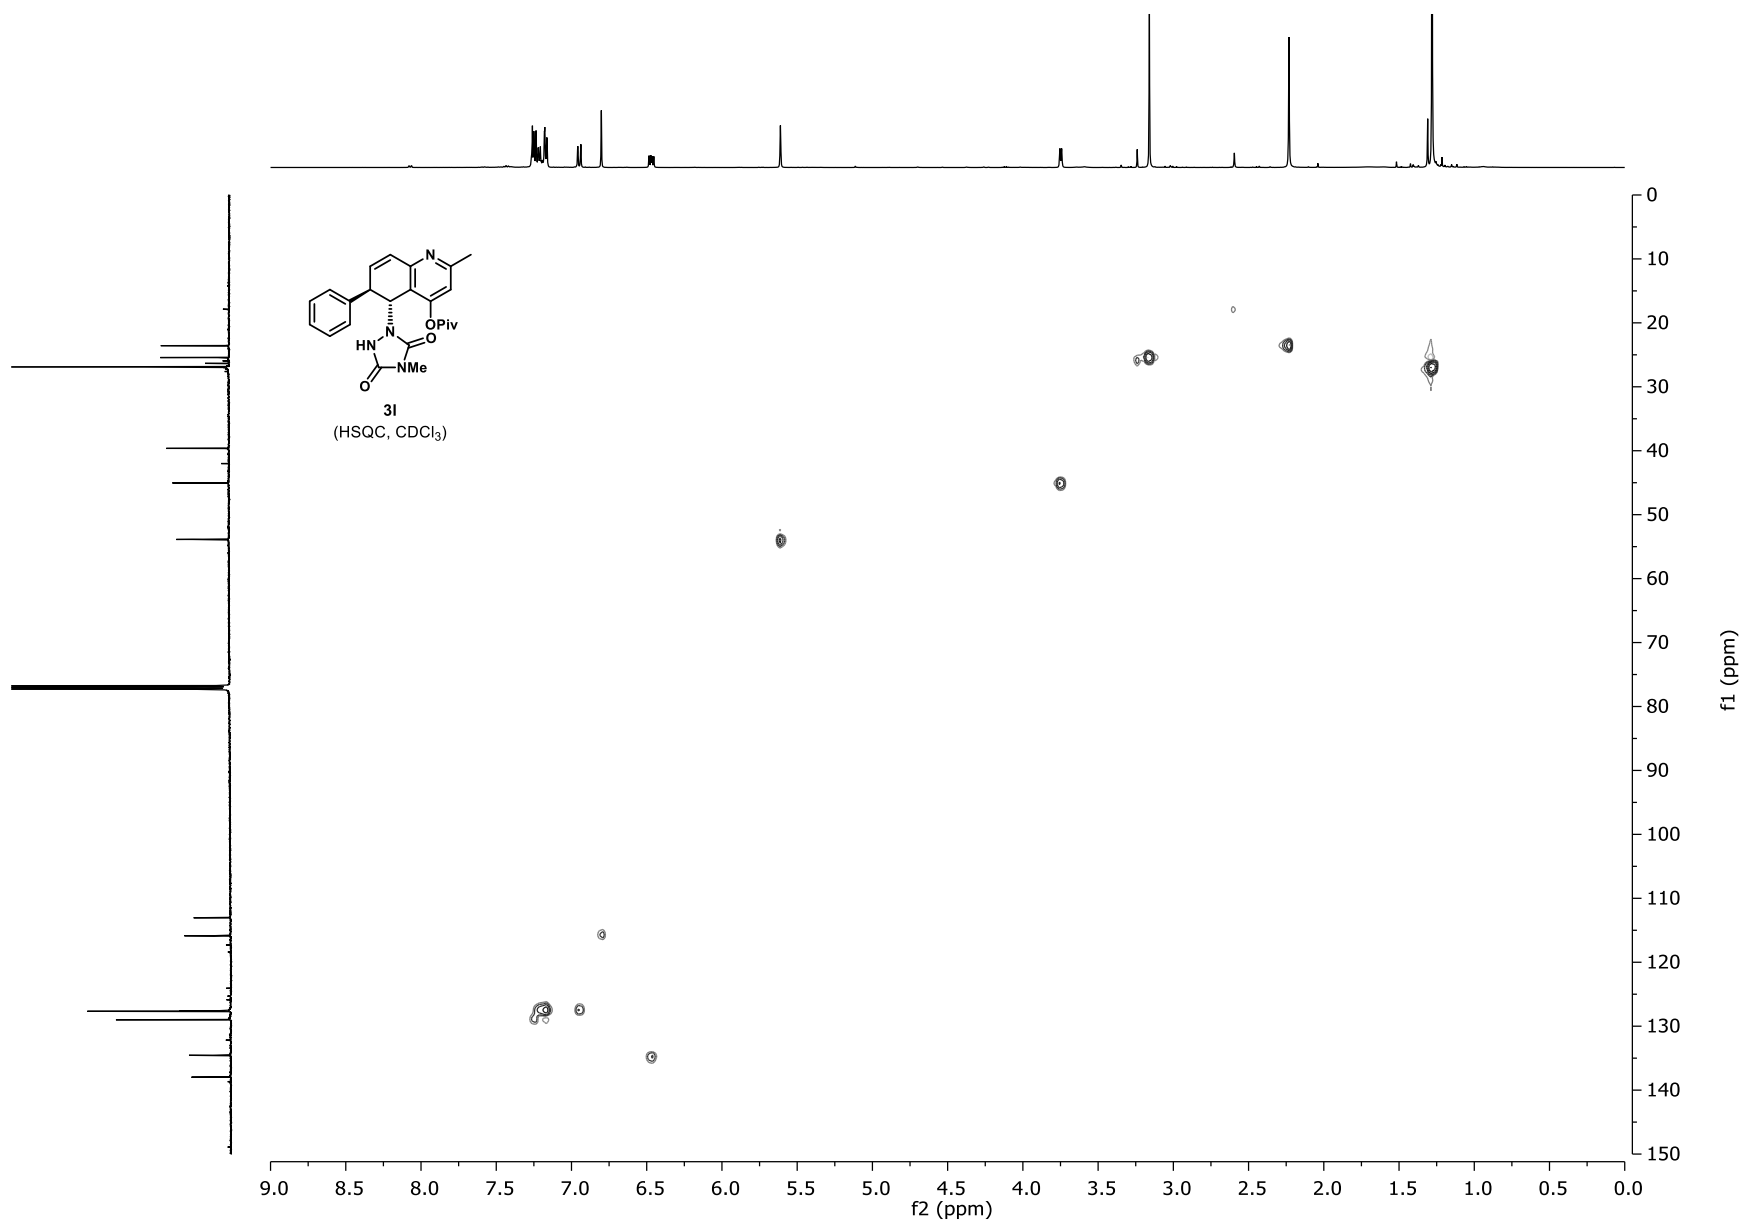

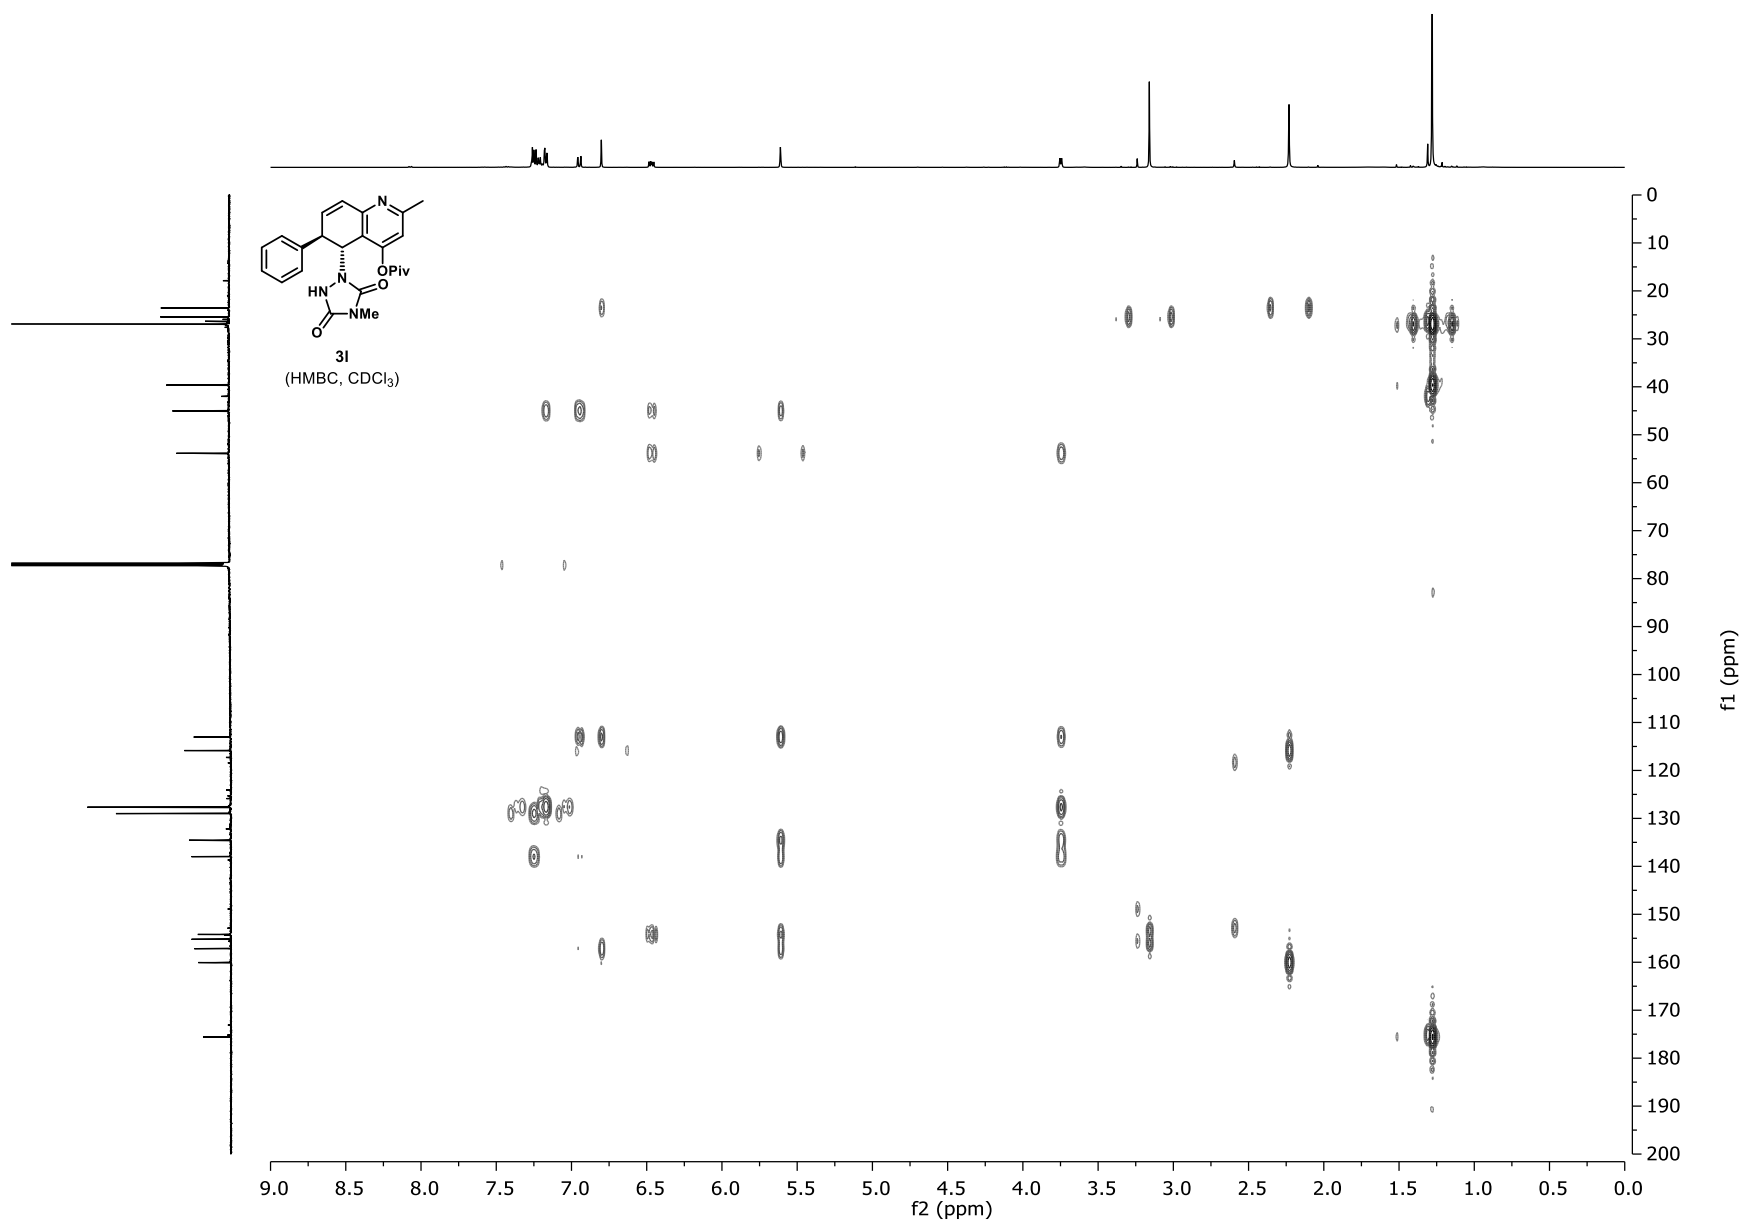

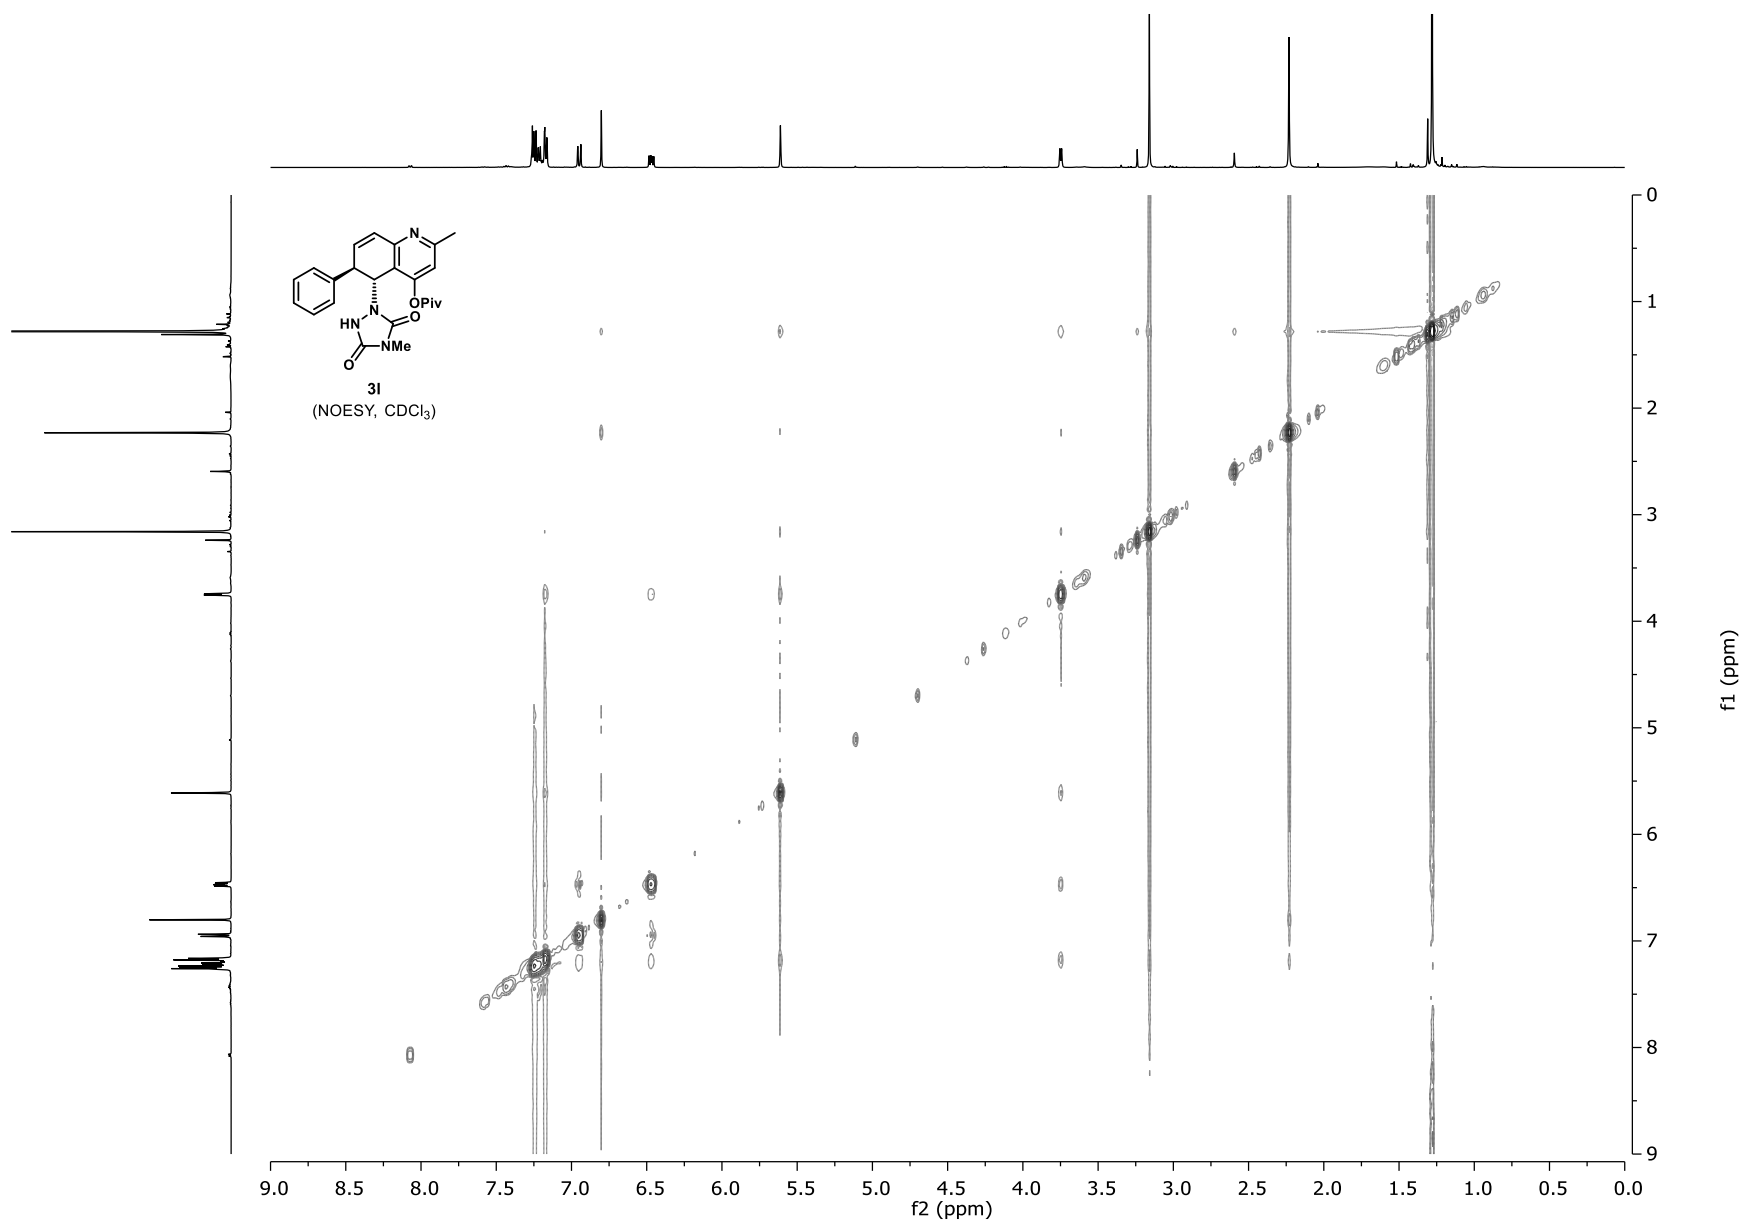

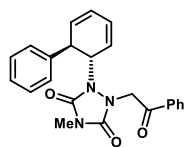

**S1**  
(<sup>1</sup>H NMR, CDCl<sub>3</sub>, 500 MHz)

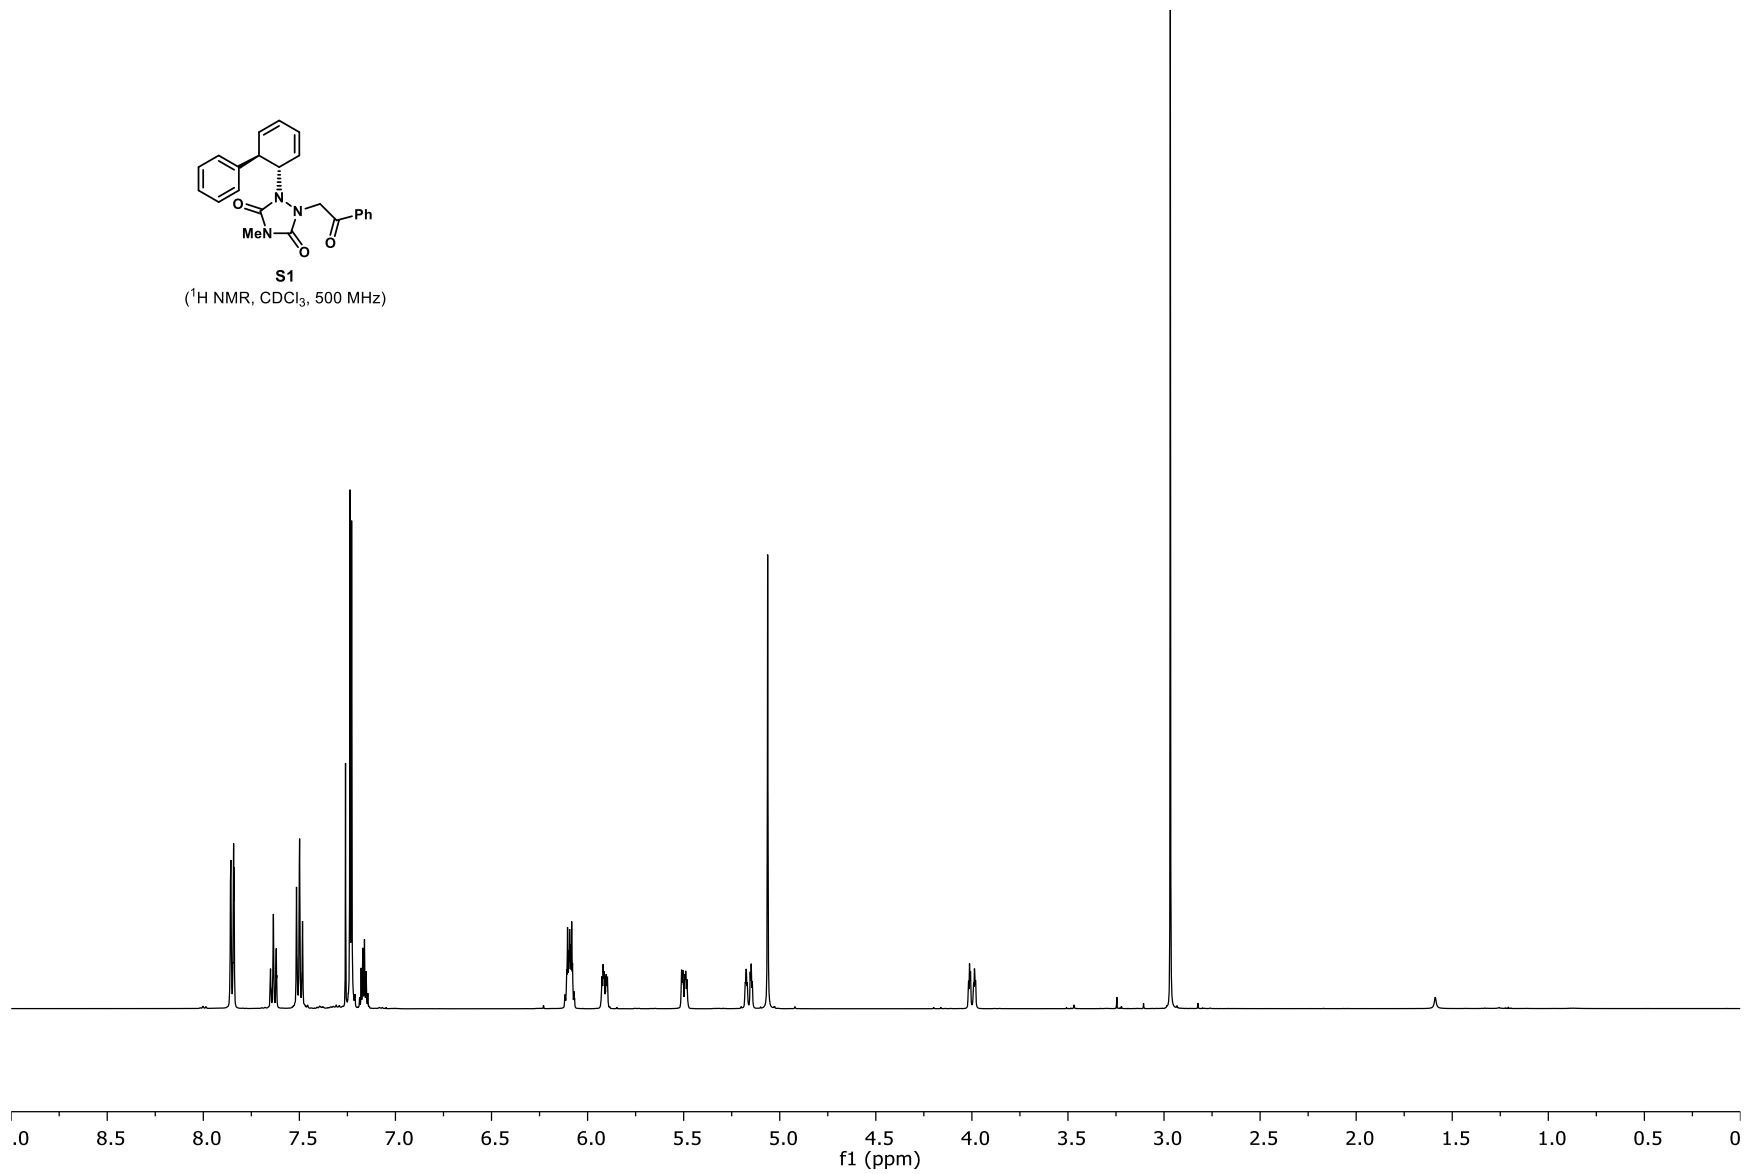

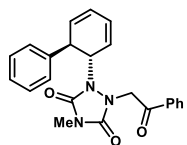

**S1**  
(<sup>13</sup>C NMR, CDCl<sub>3</sub>, 126 MHz)

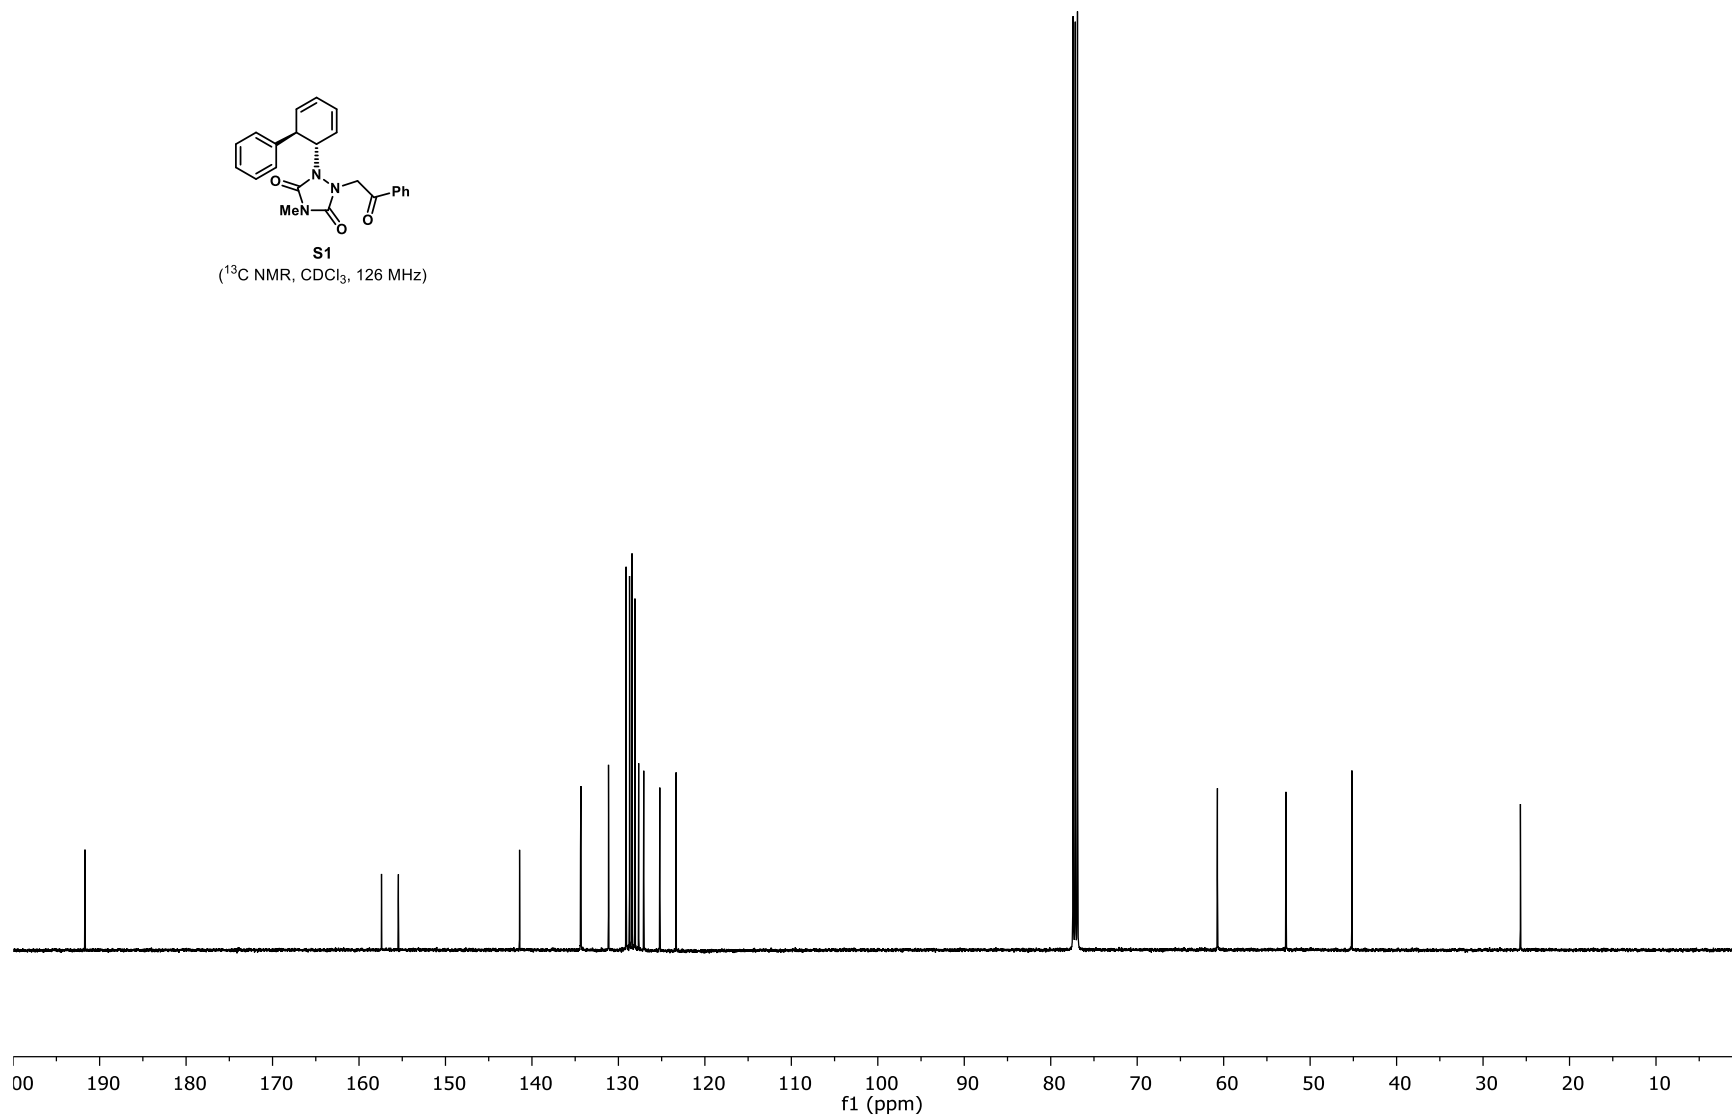

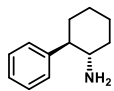

4  
(<sup>1</sup>H NMR, CDCl<sub>3</sub>, 500 MHz)

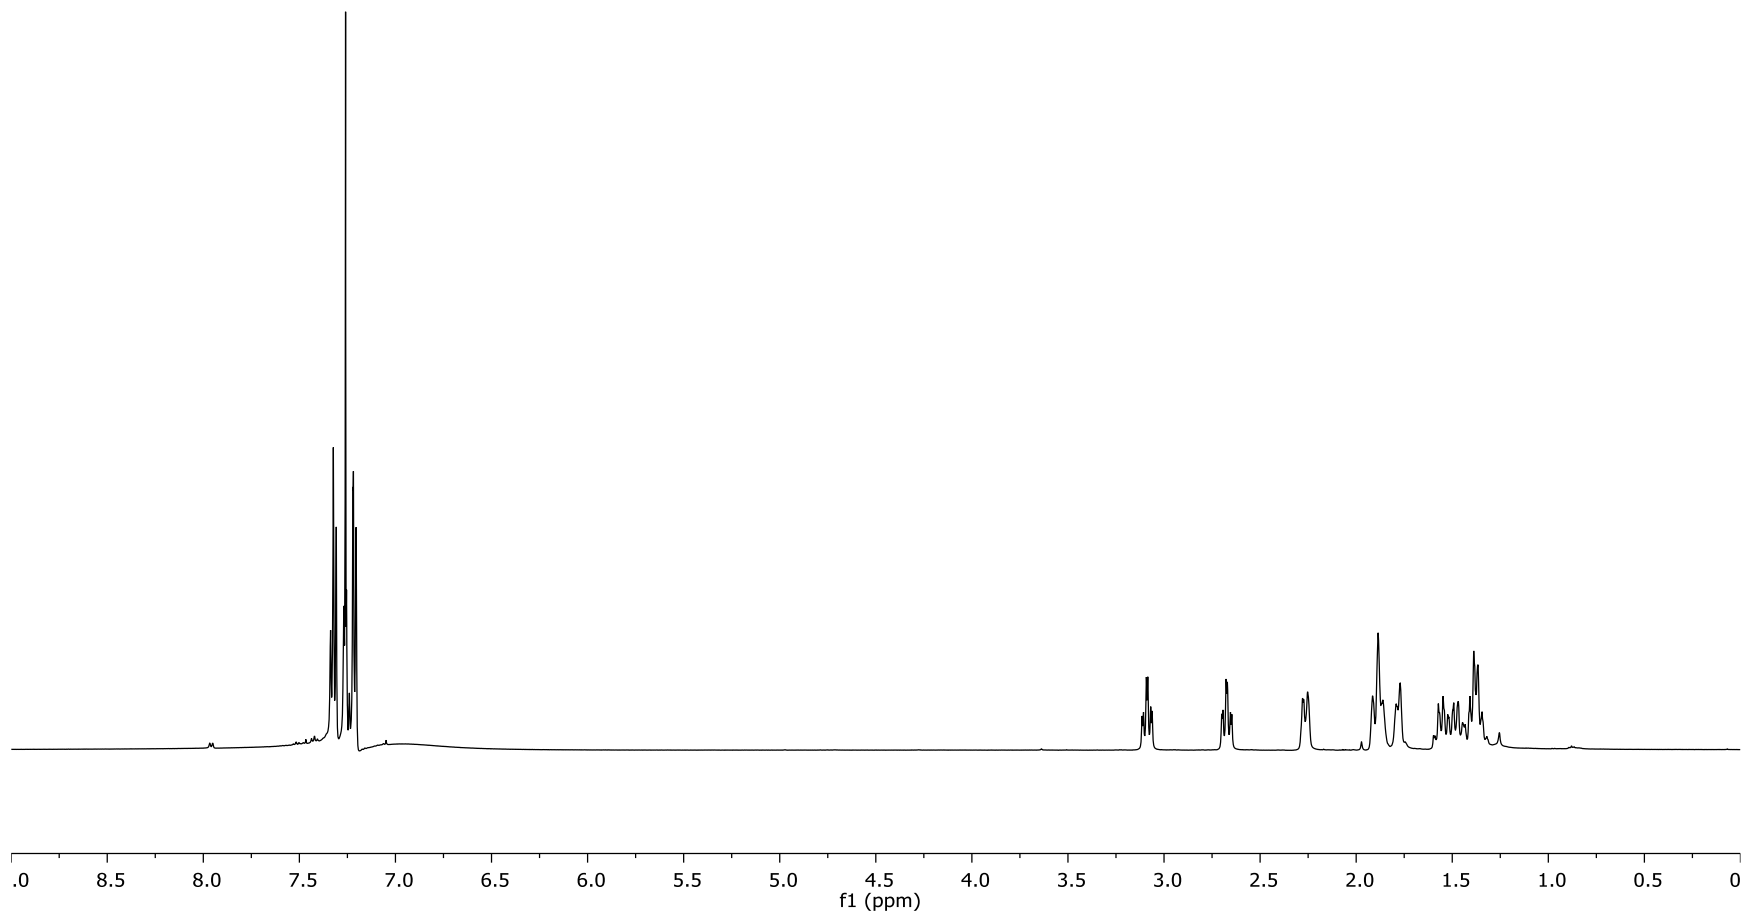

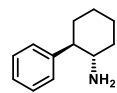

4

(<sup>13</sup>C NMR, CDCl<sub>3</sub>, 126 MHz)

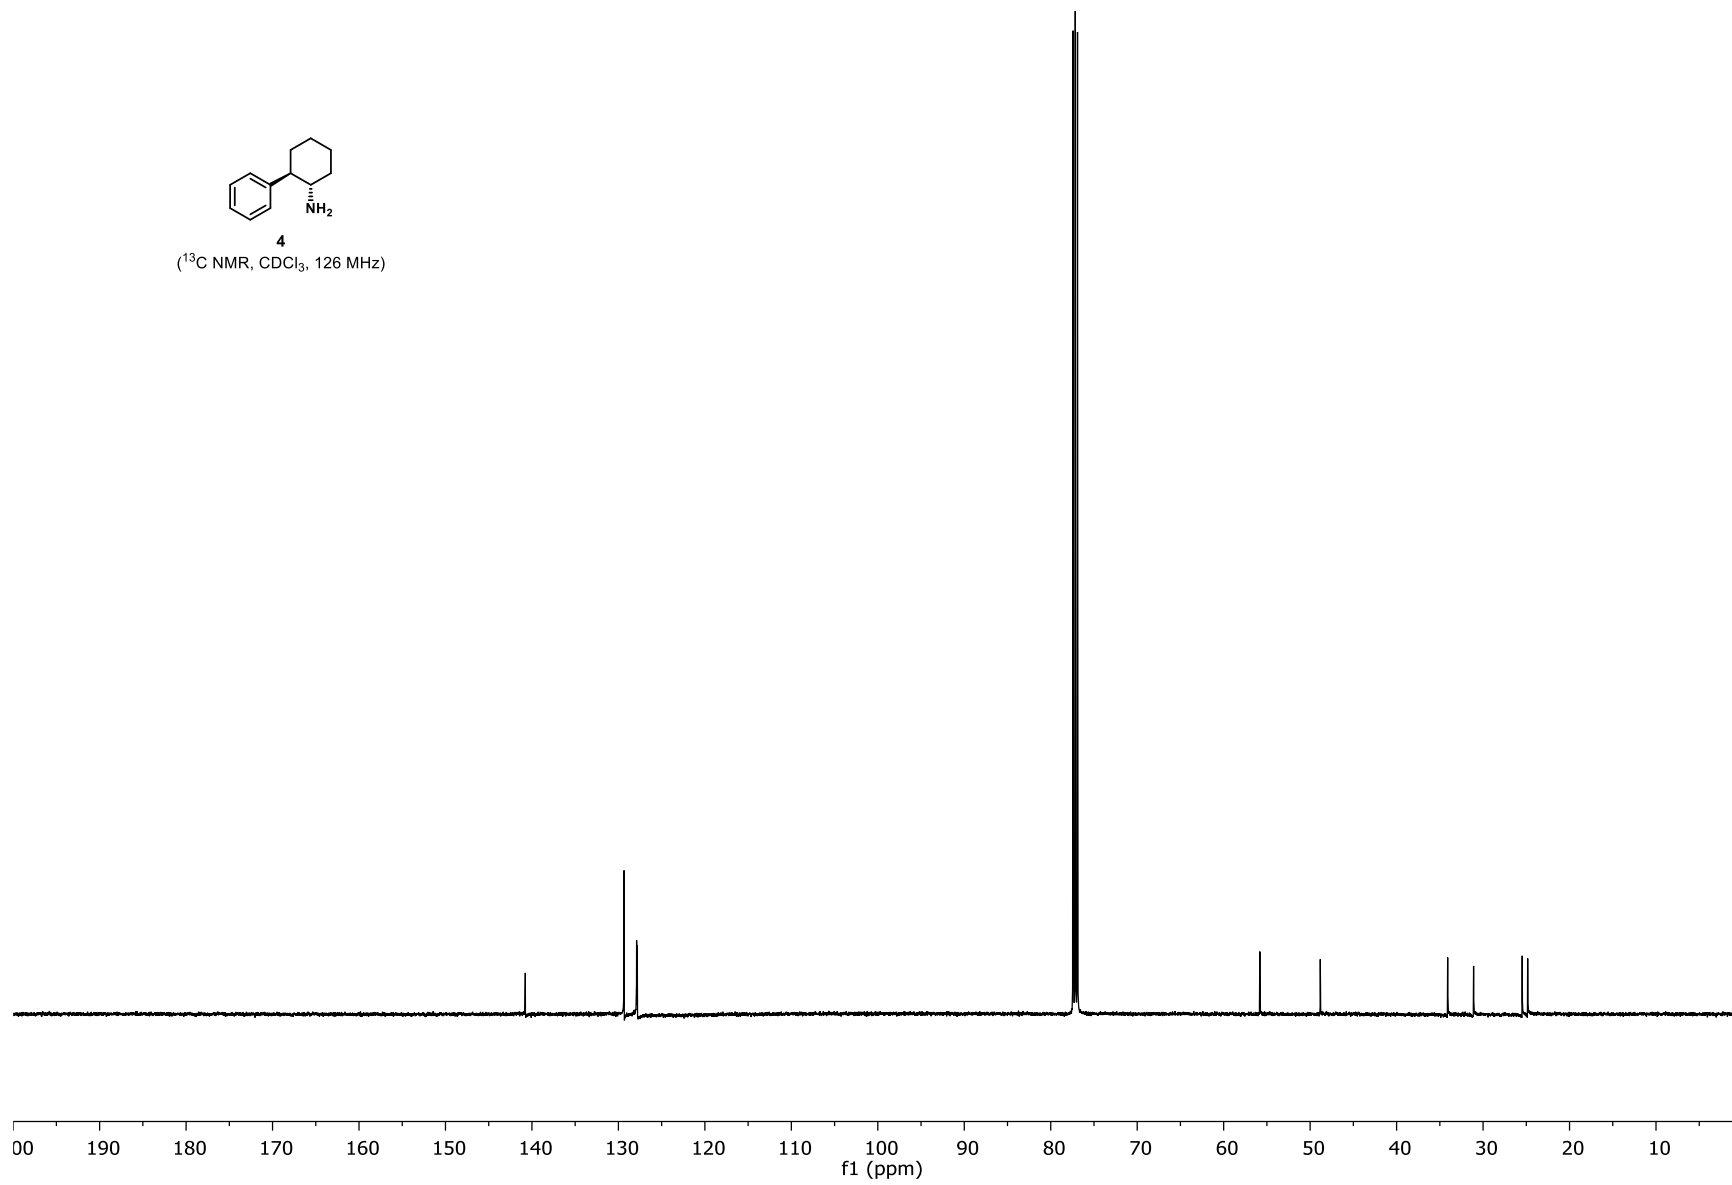



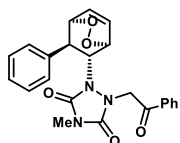

**S2**  
(<sup>1</sup>H NMR, CDCl<sub>3</sub>, 500 MHz)

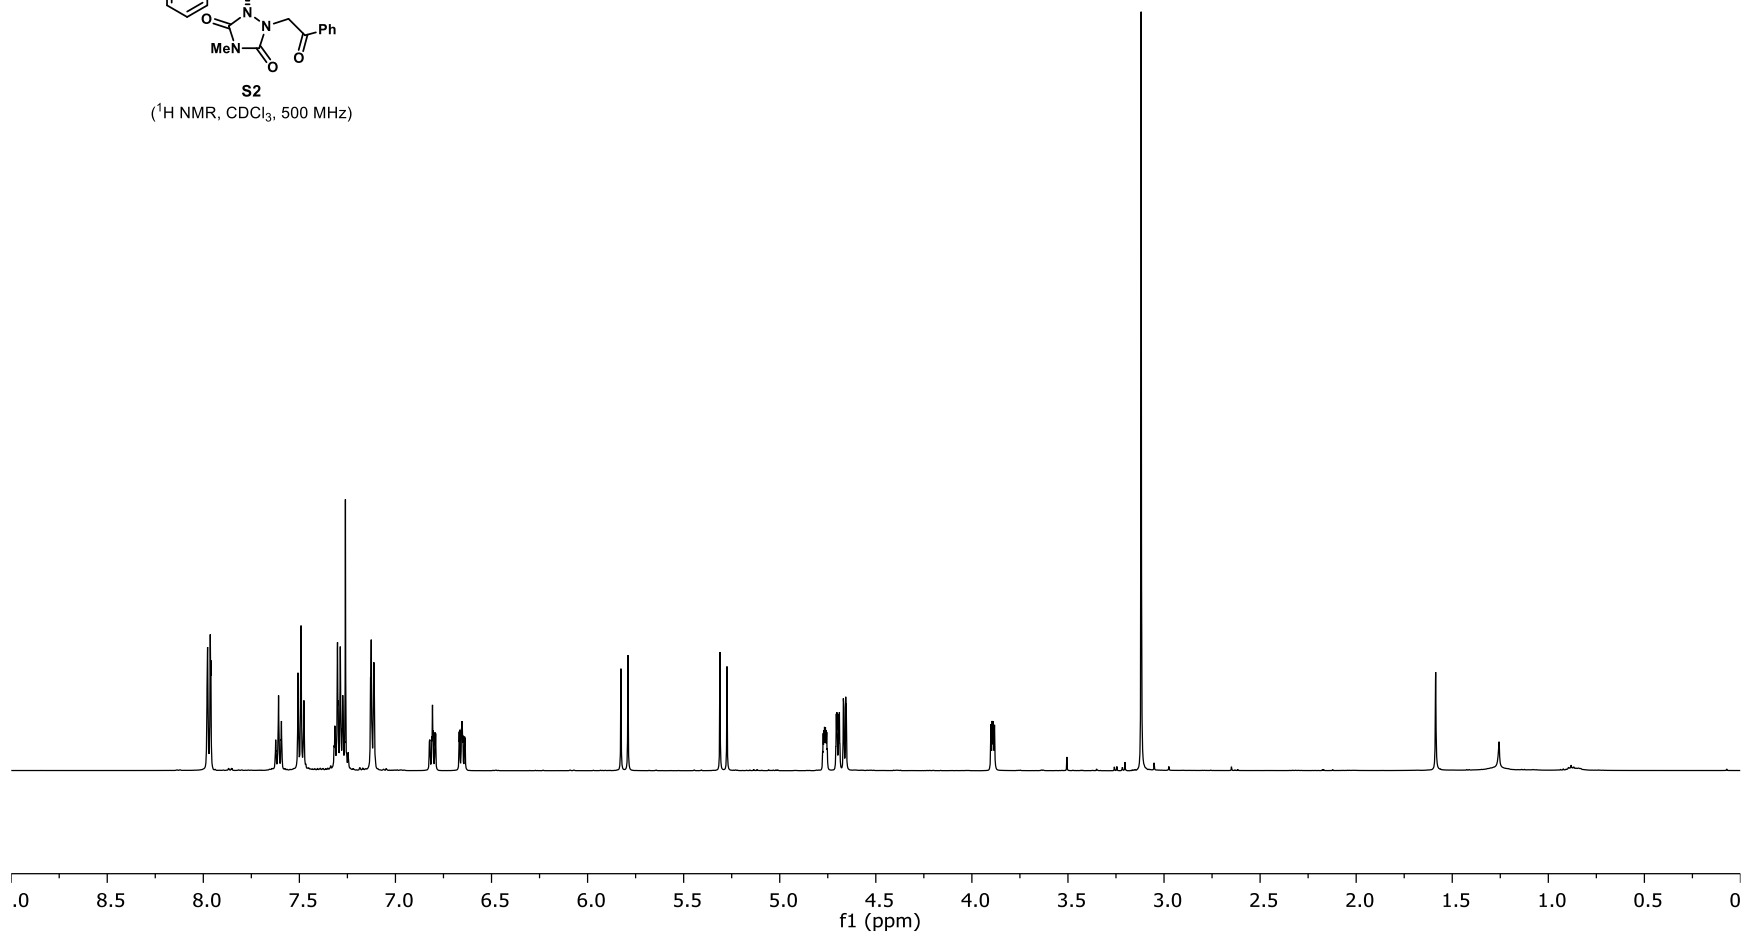

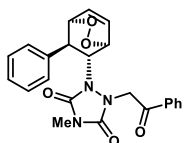

**S2**

(<sup>13</sup>C NMR, CDCl<sub>3</sub>, 126 MHz)

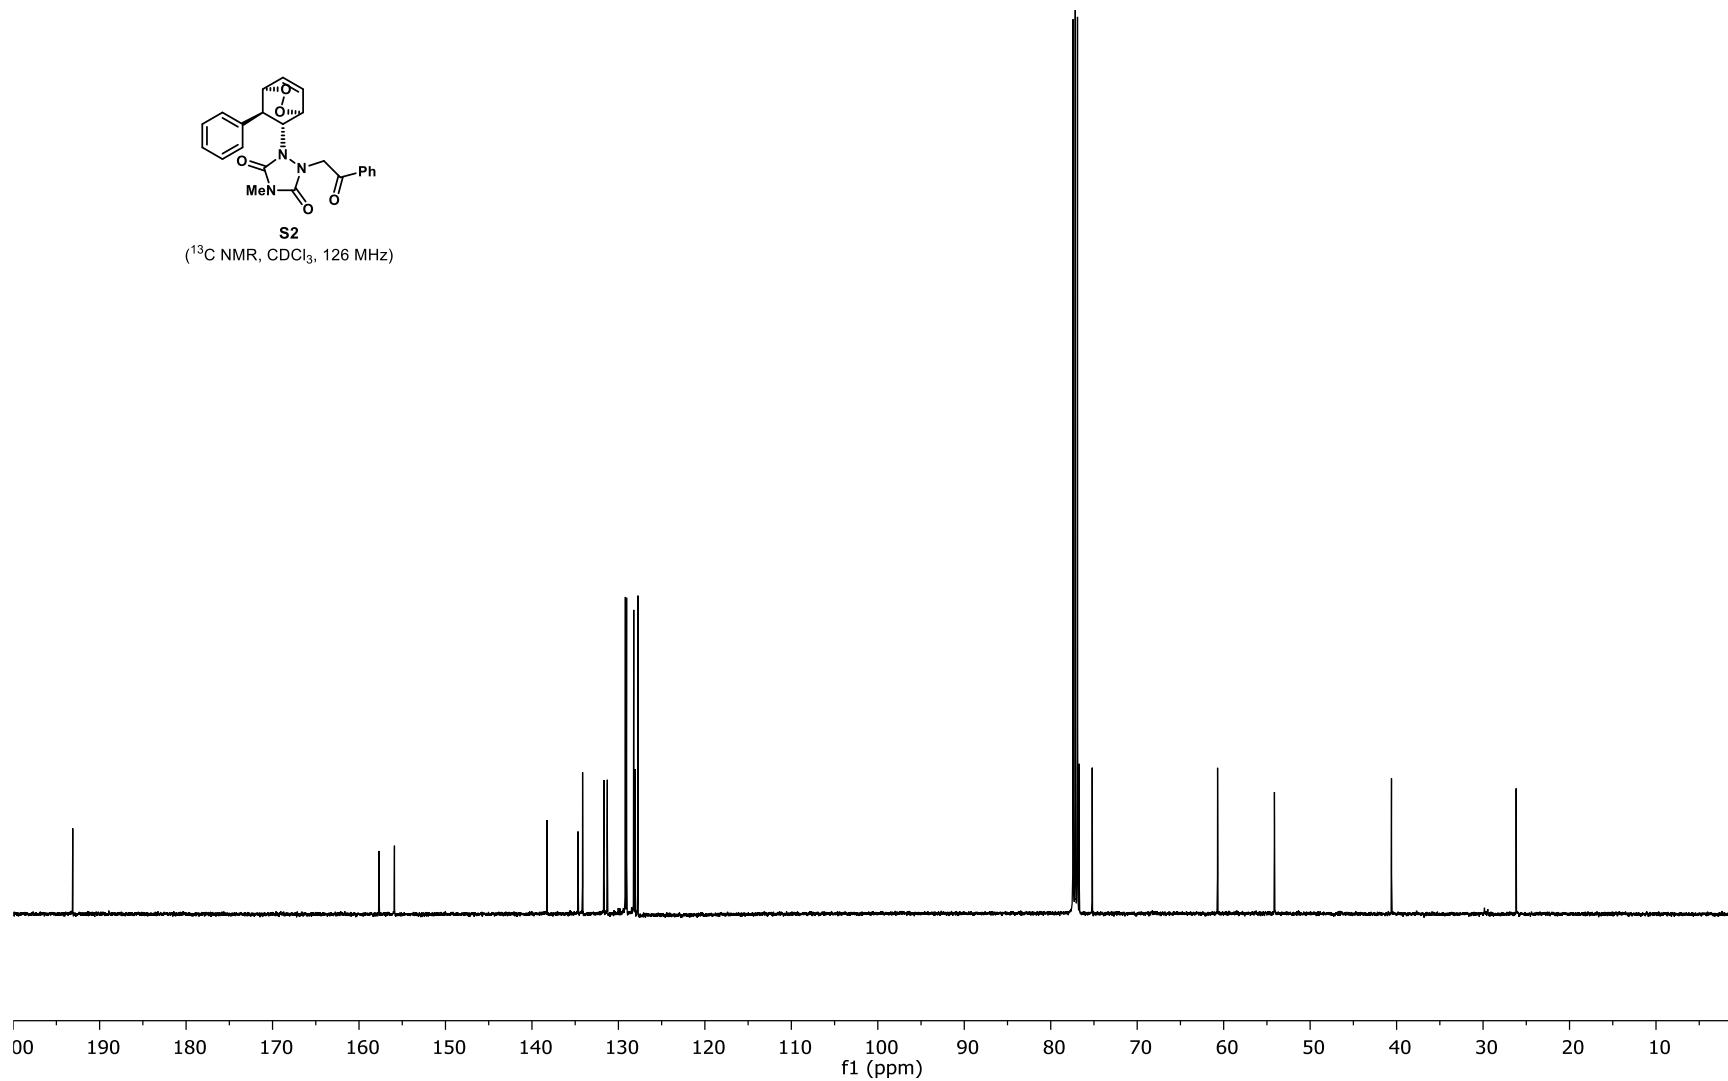

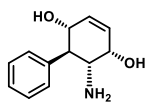

5

(<sup>1</sup>H NMR, MeOD, 500 MHz)

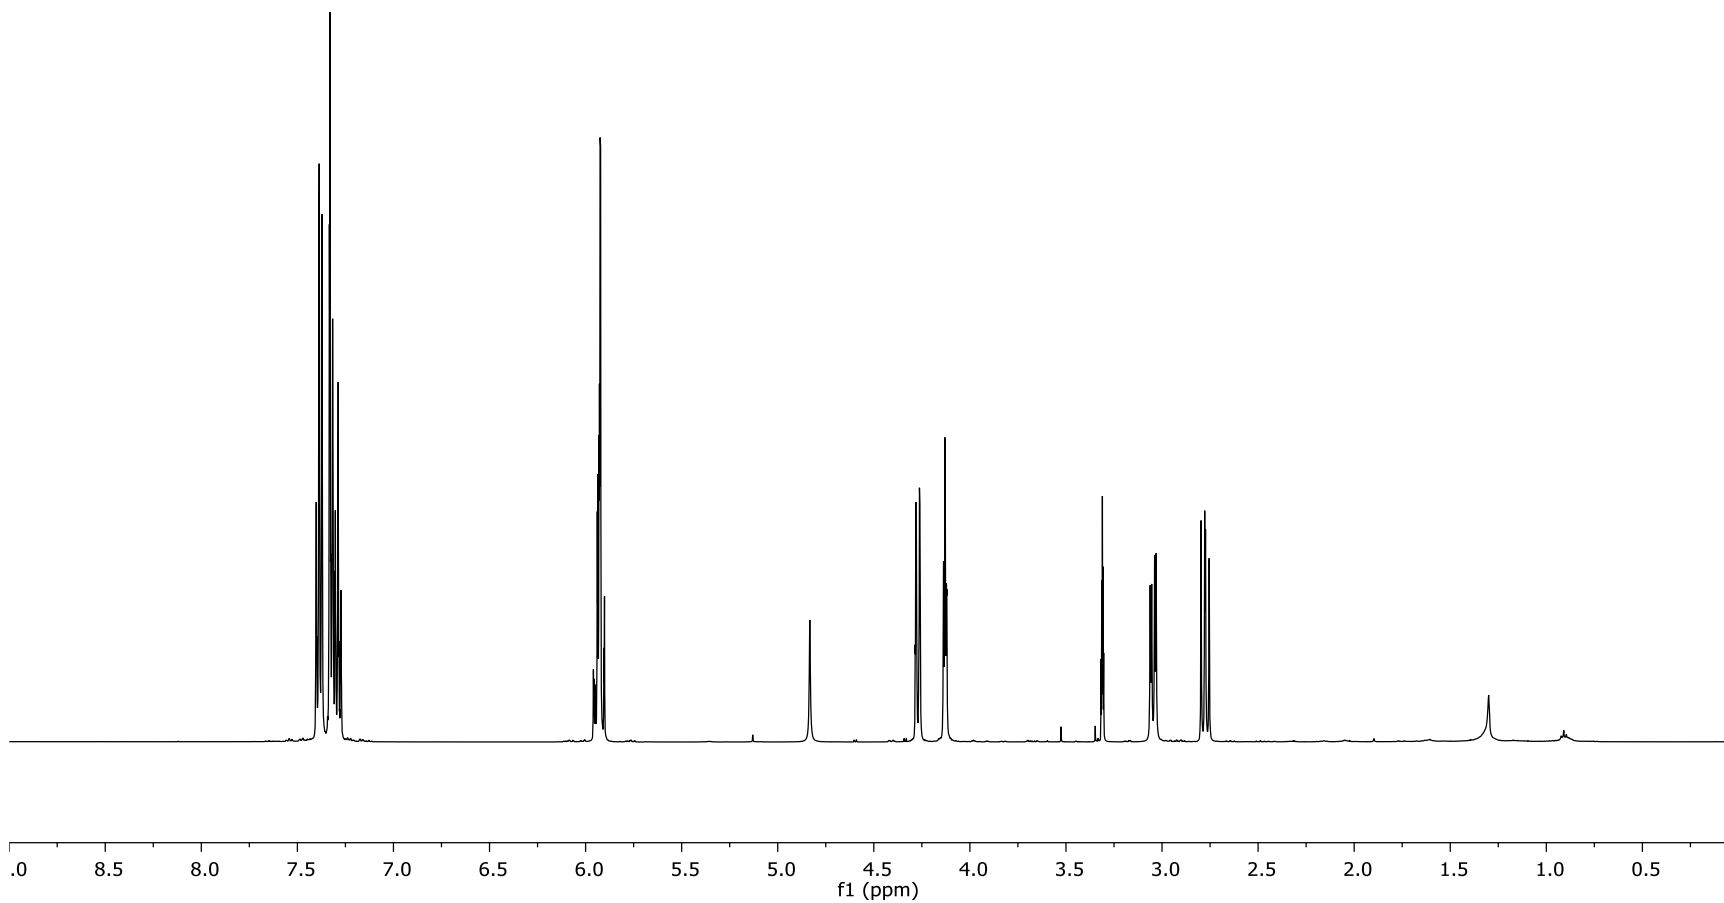

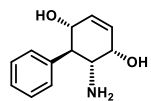

5

(<sup>13</sup>C NMR, MeOD, 126 MHz)

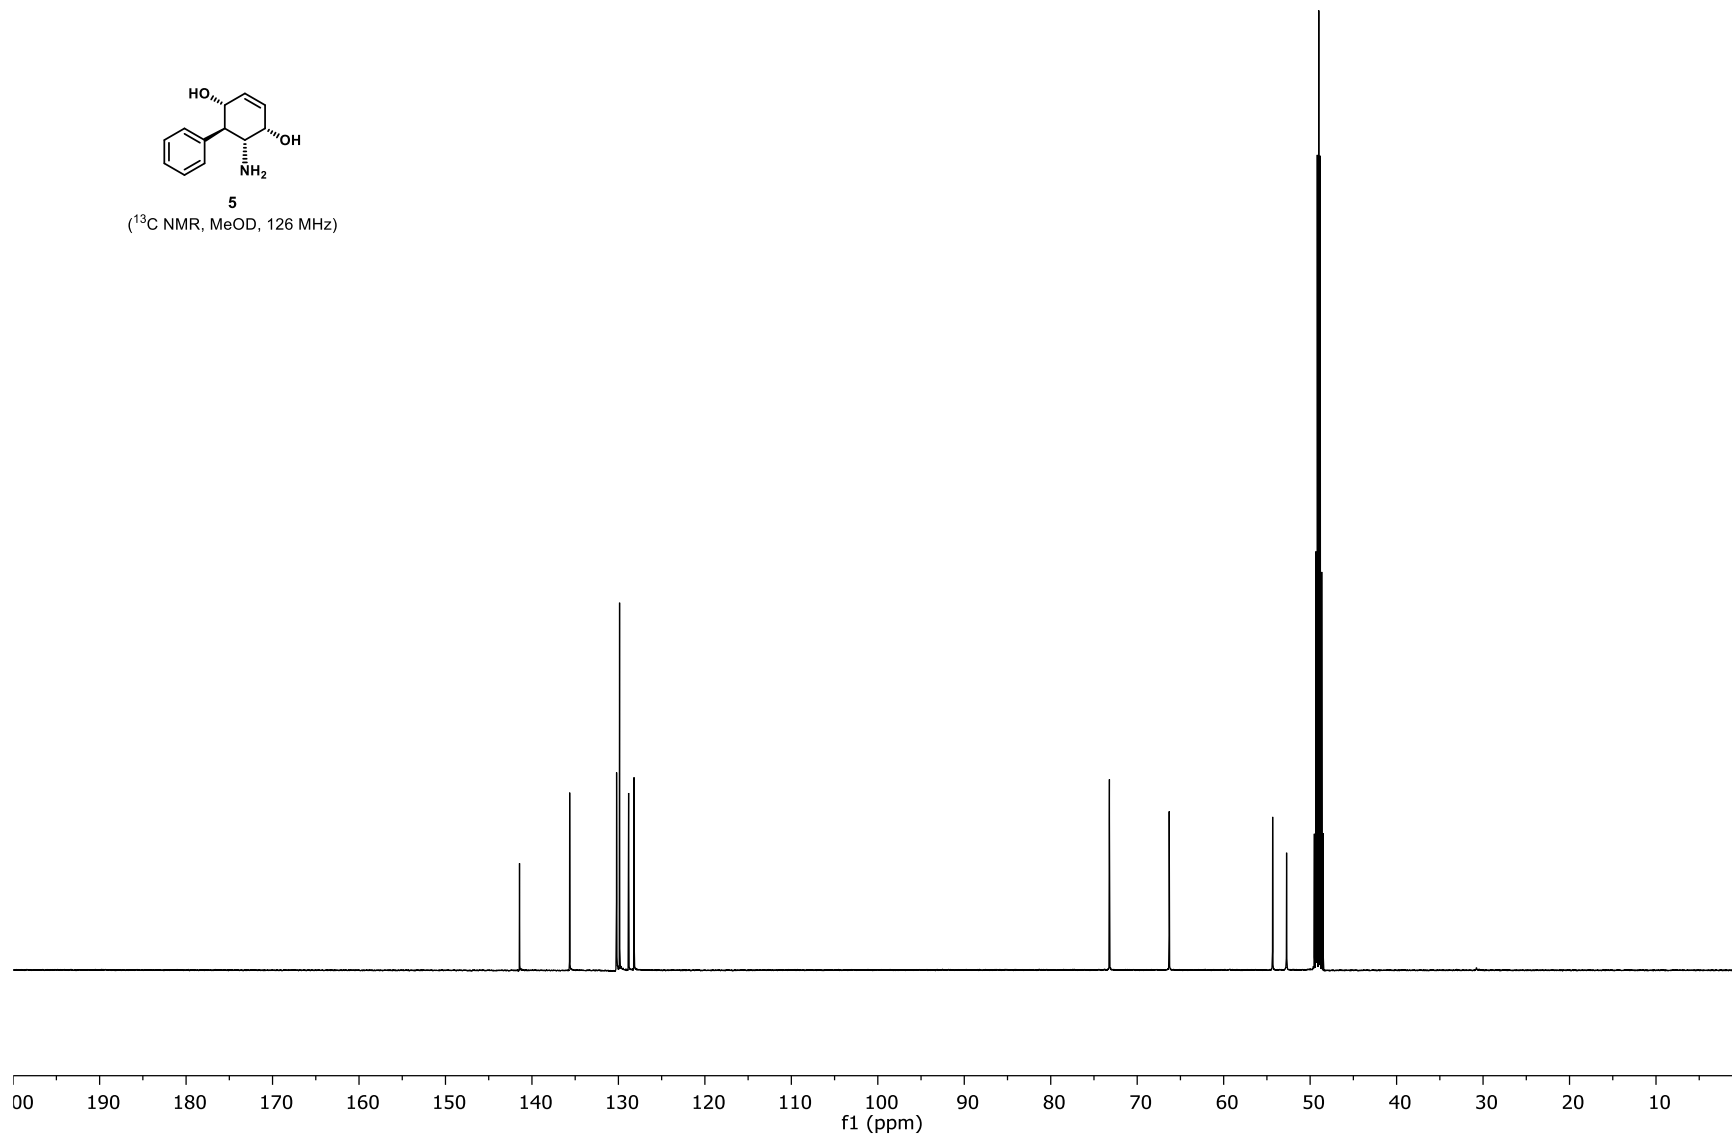

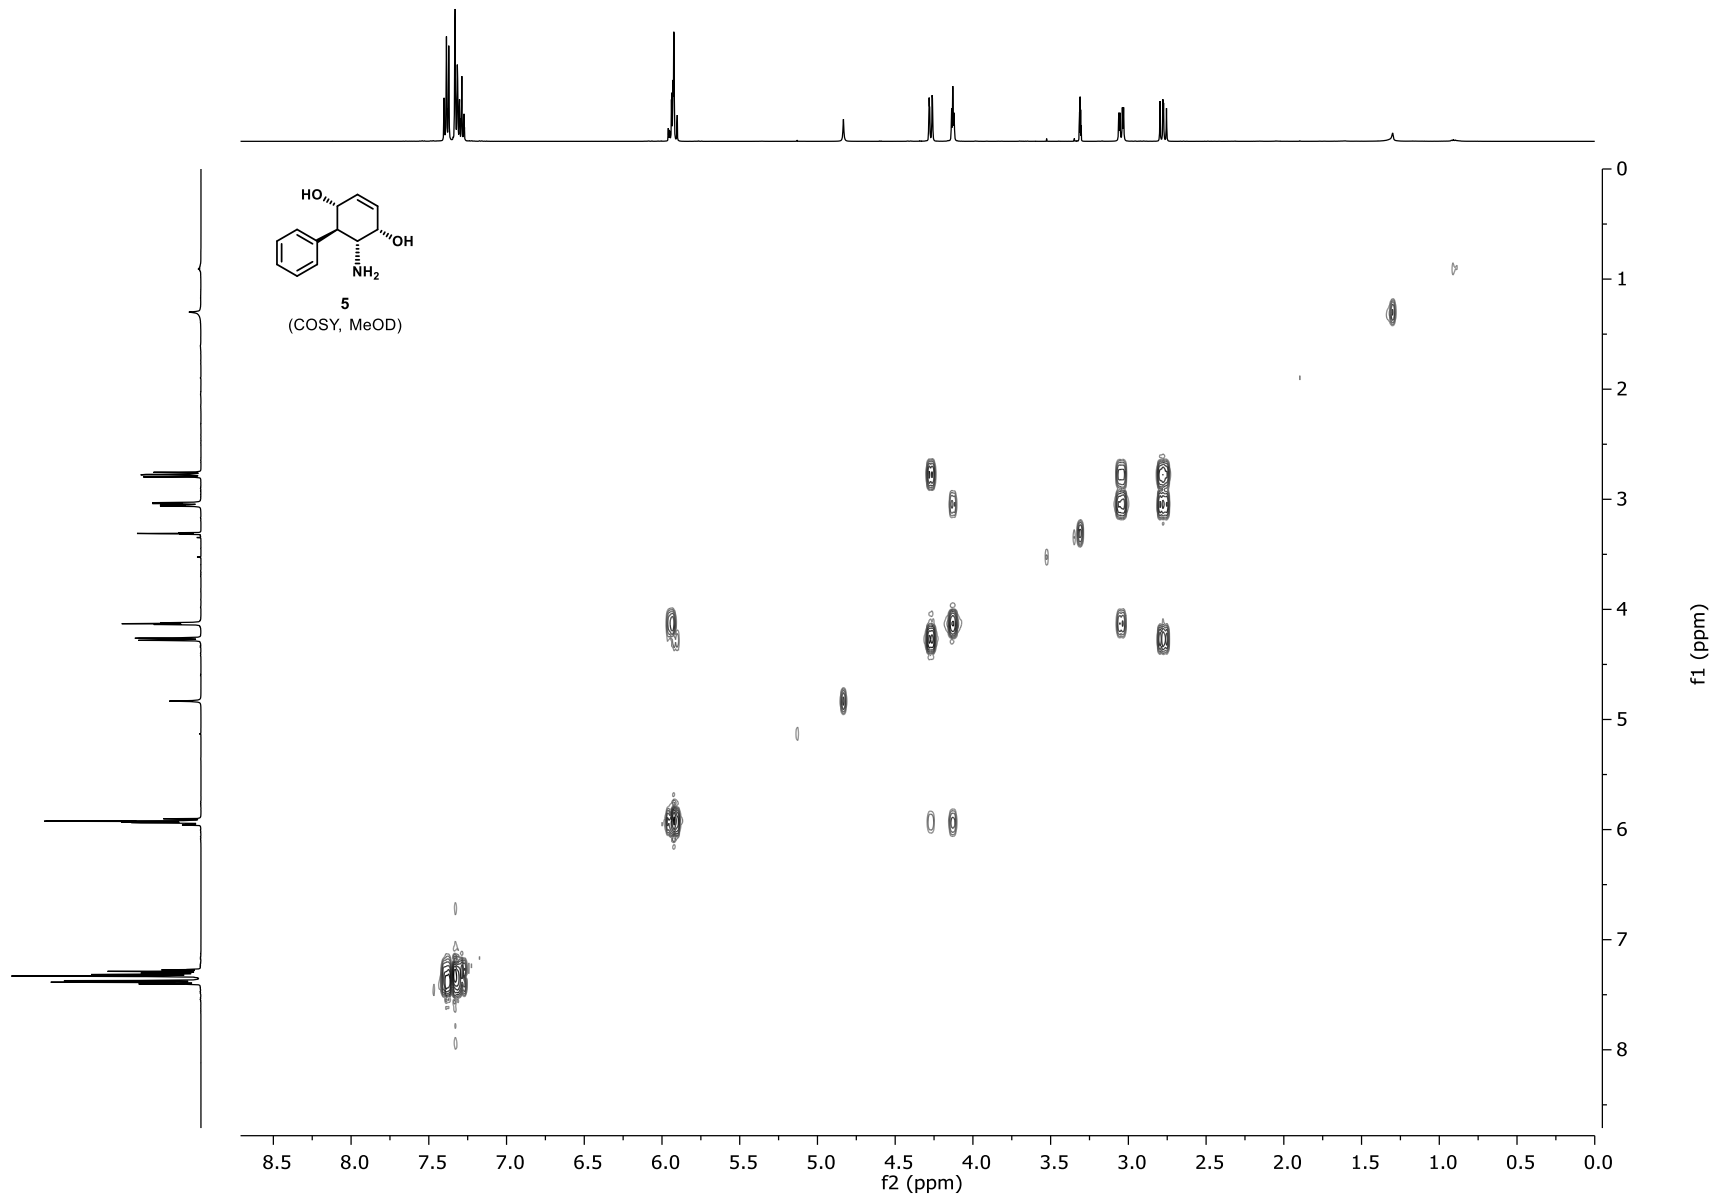

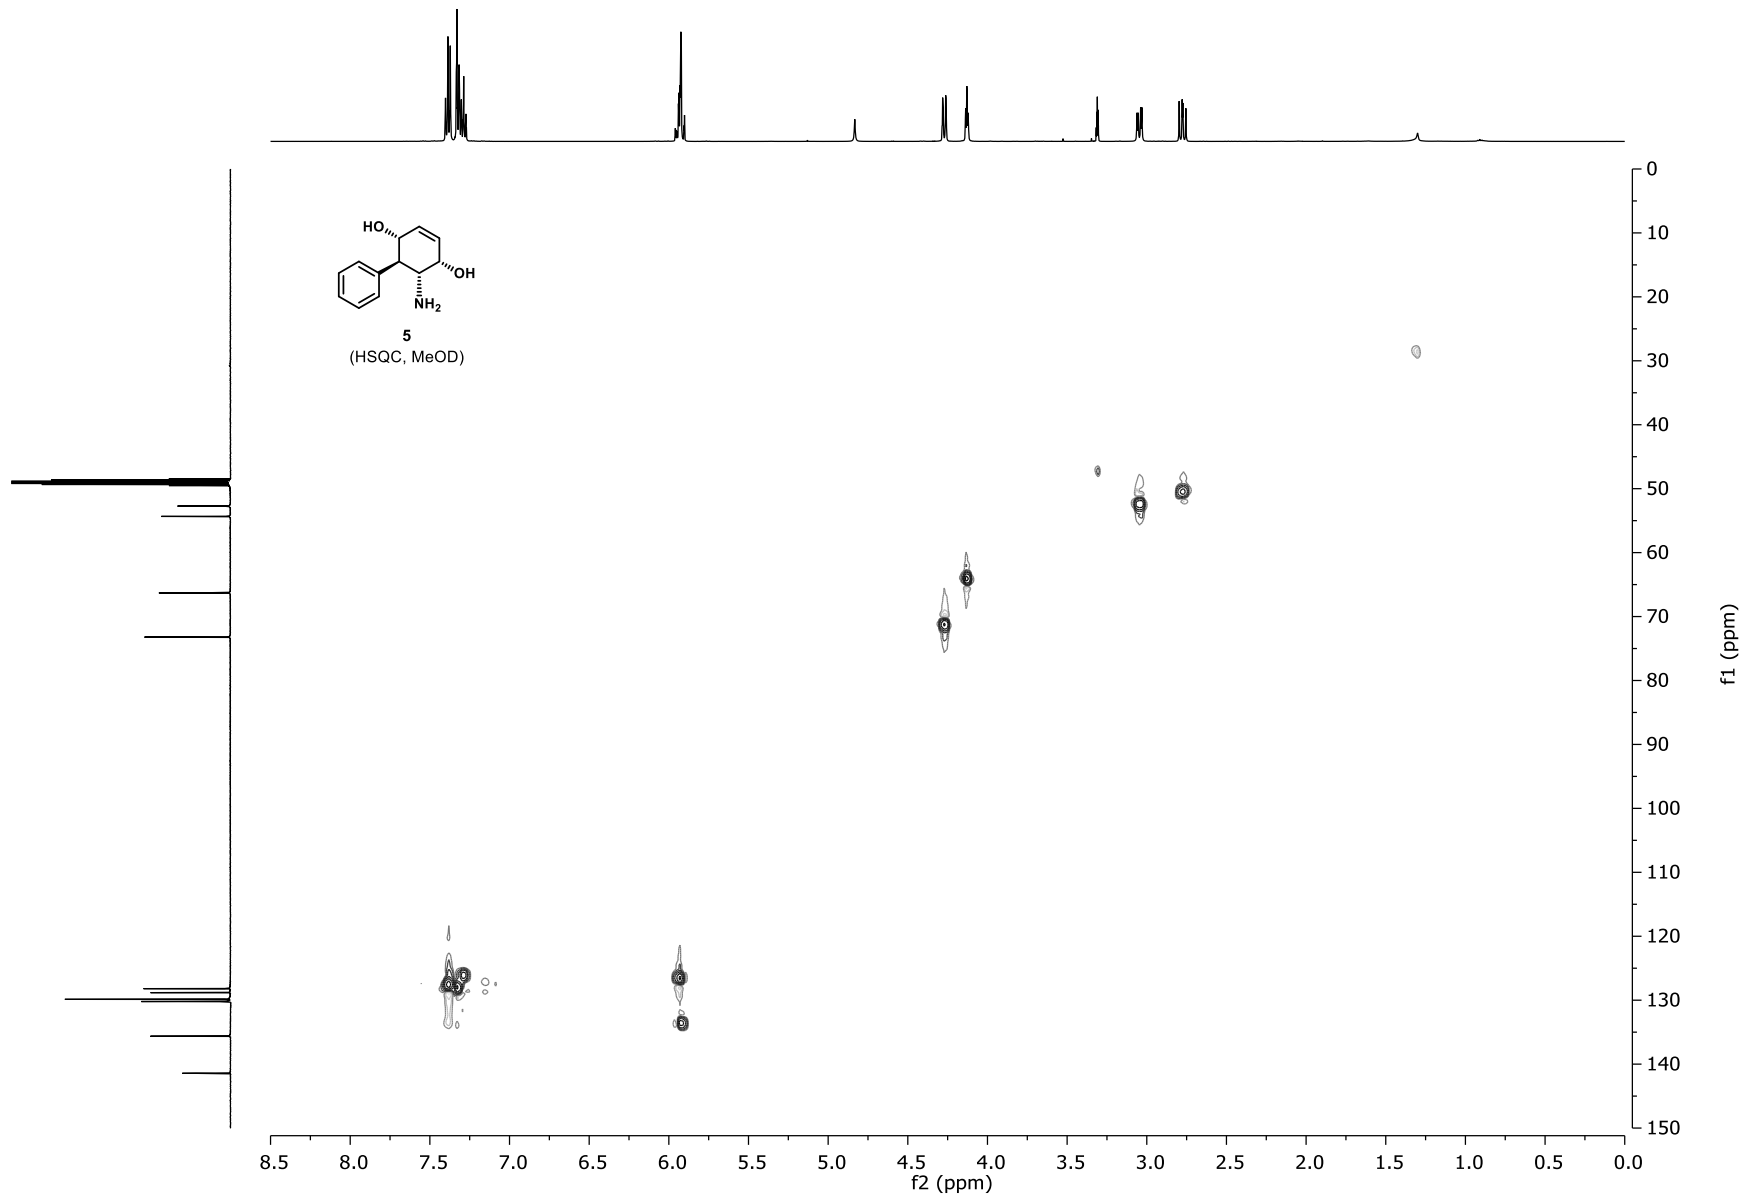

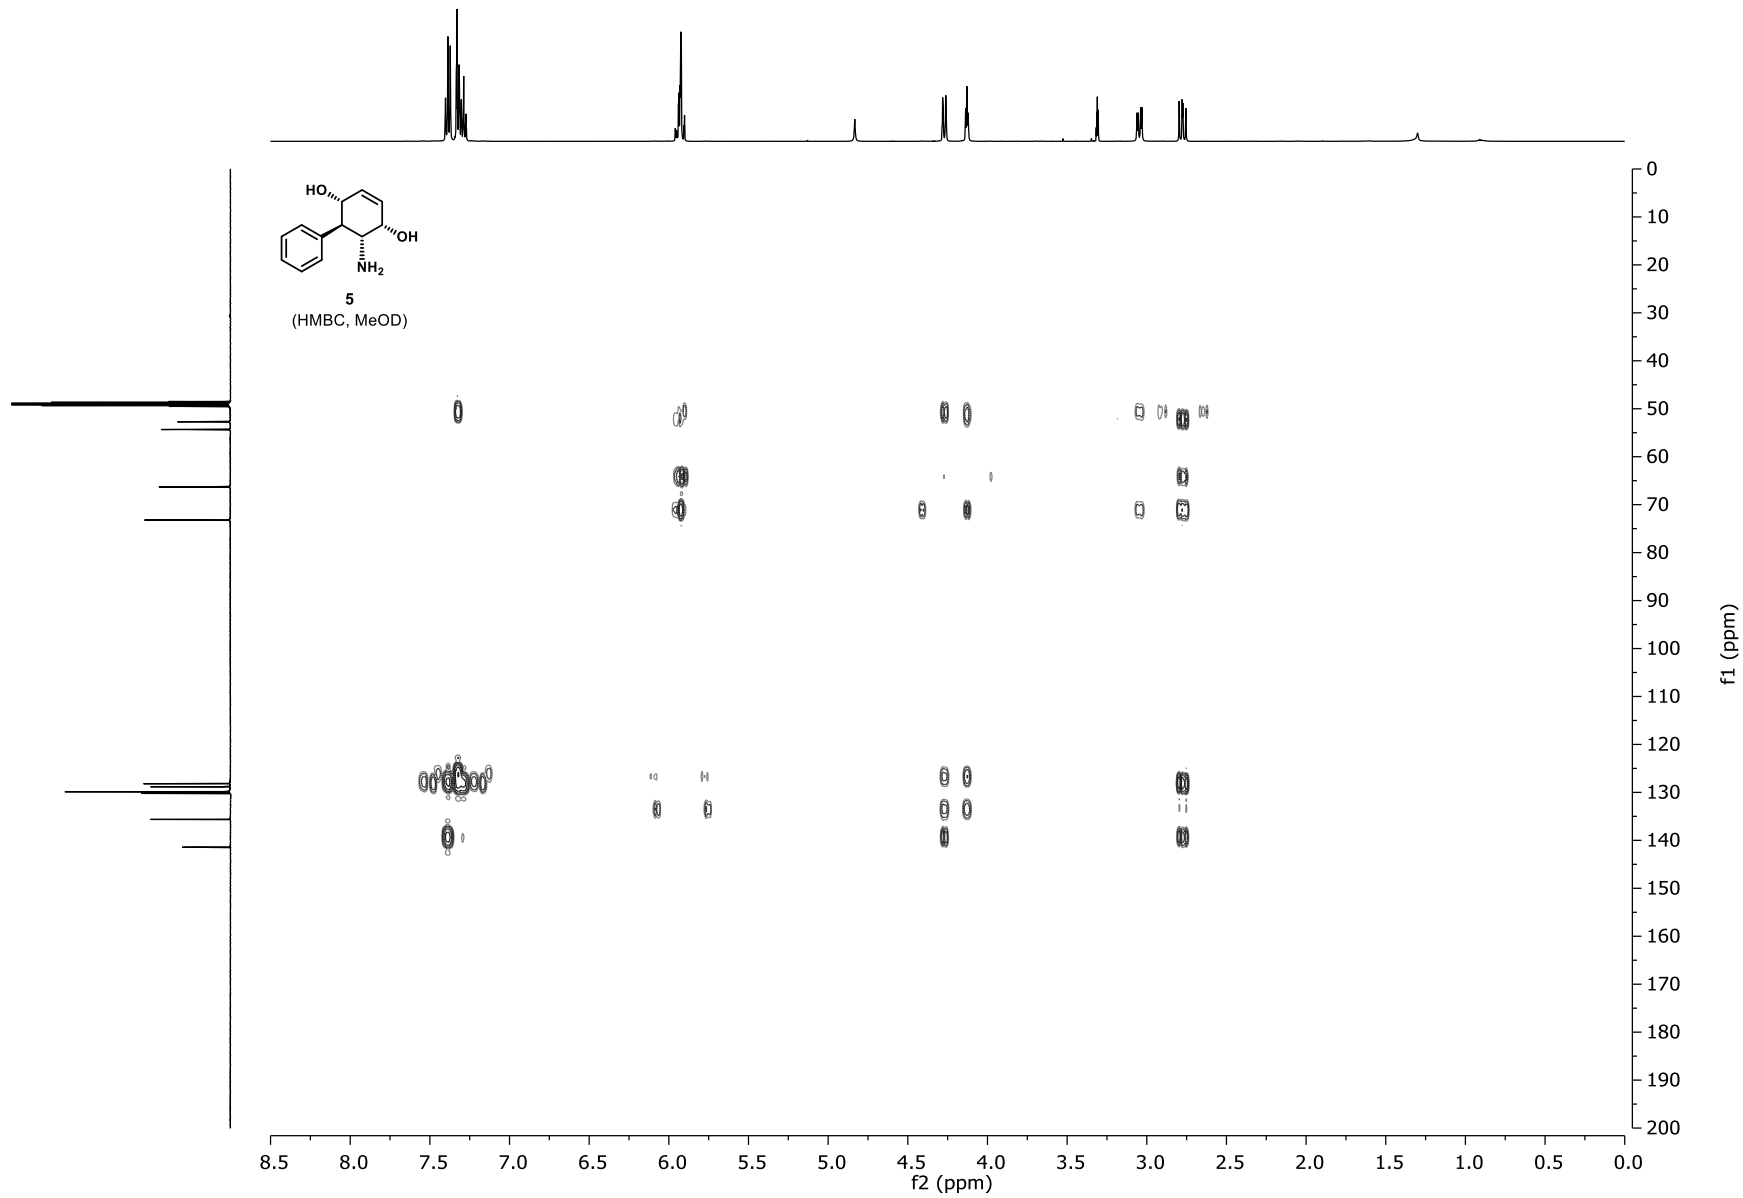

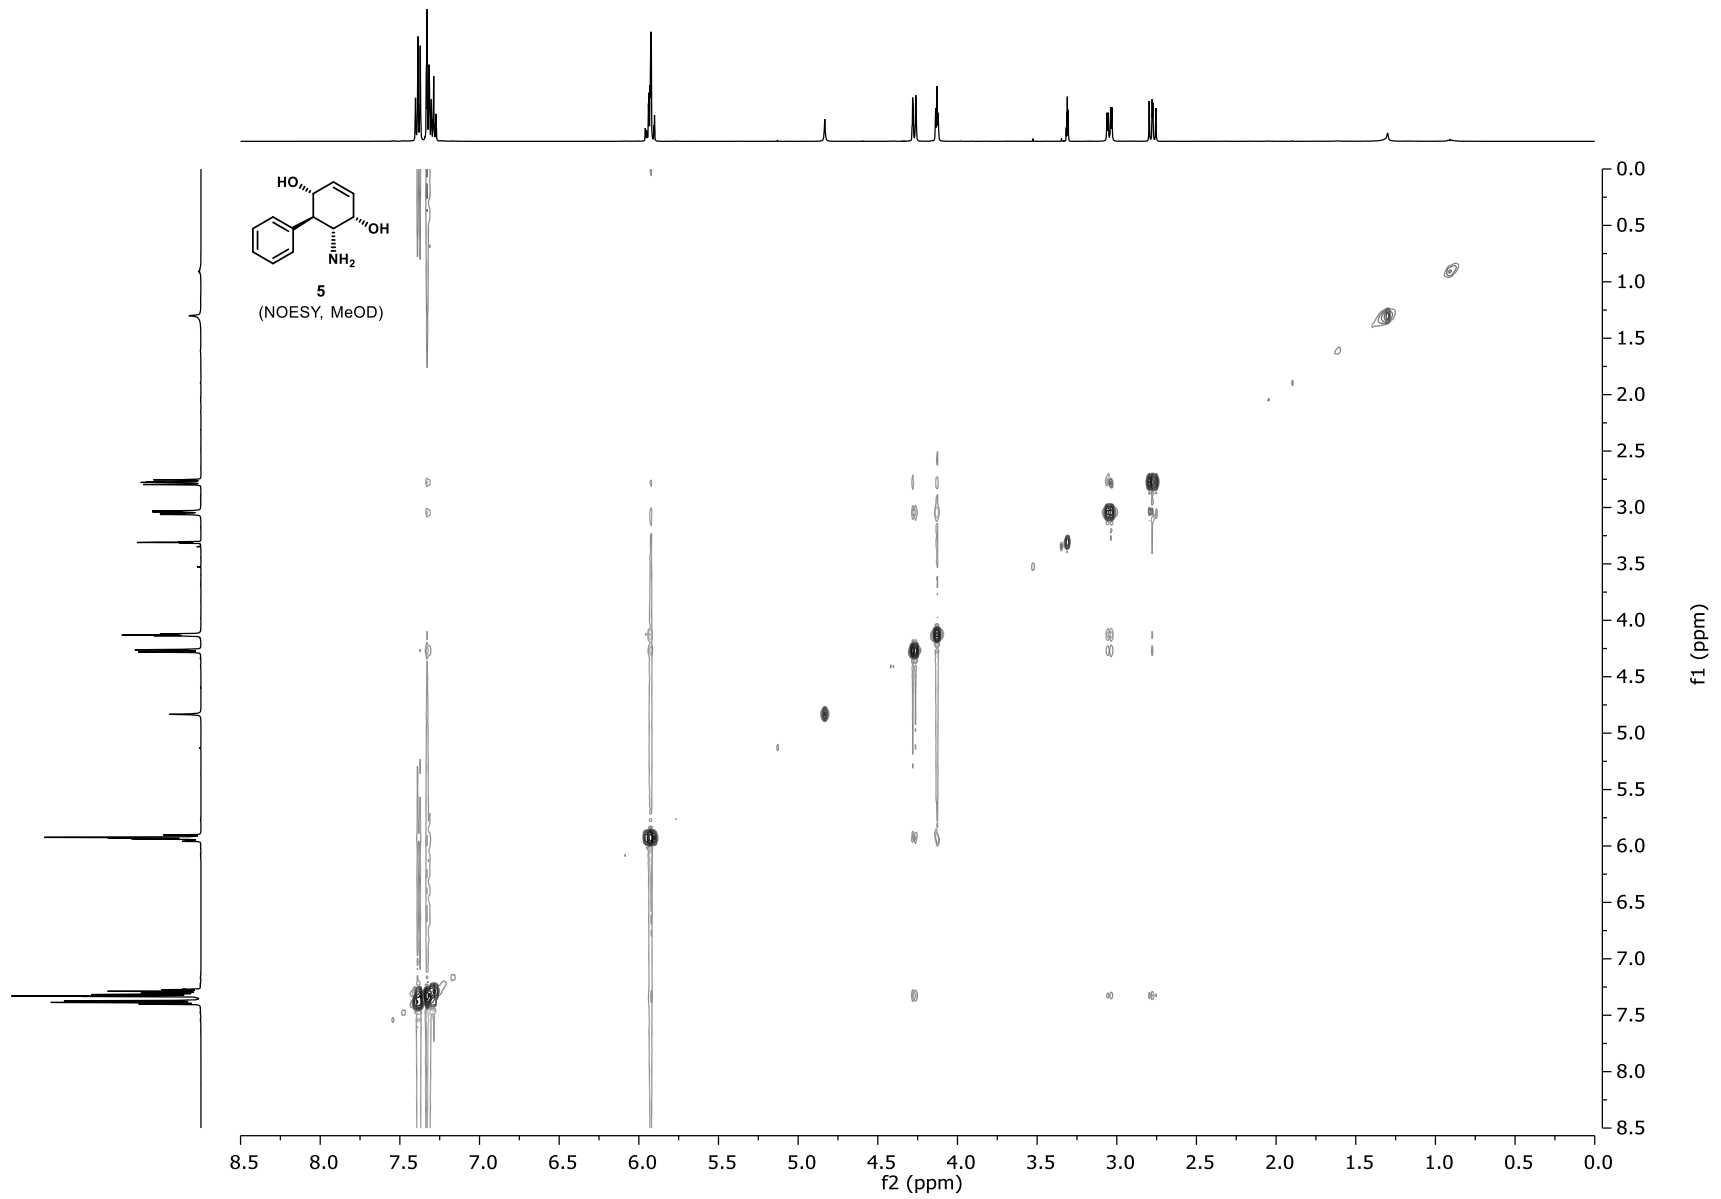



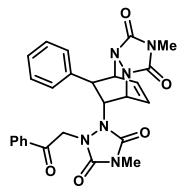

S3

(<sup>1</sup>H NMR, CDCl<sub>3</sub>, 500 MHz)

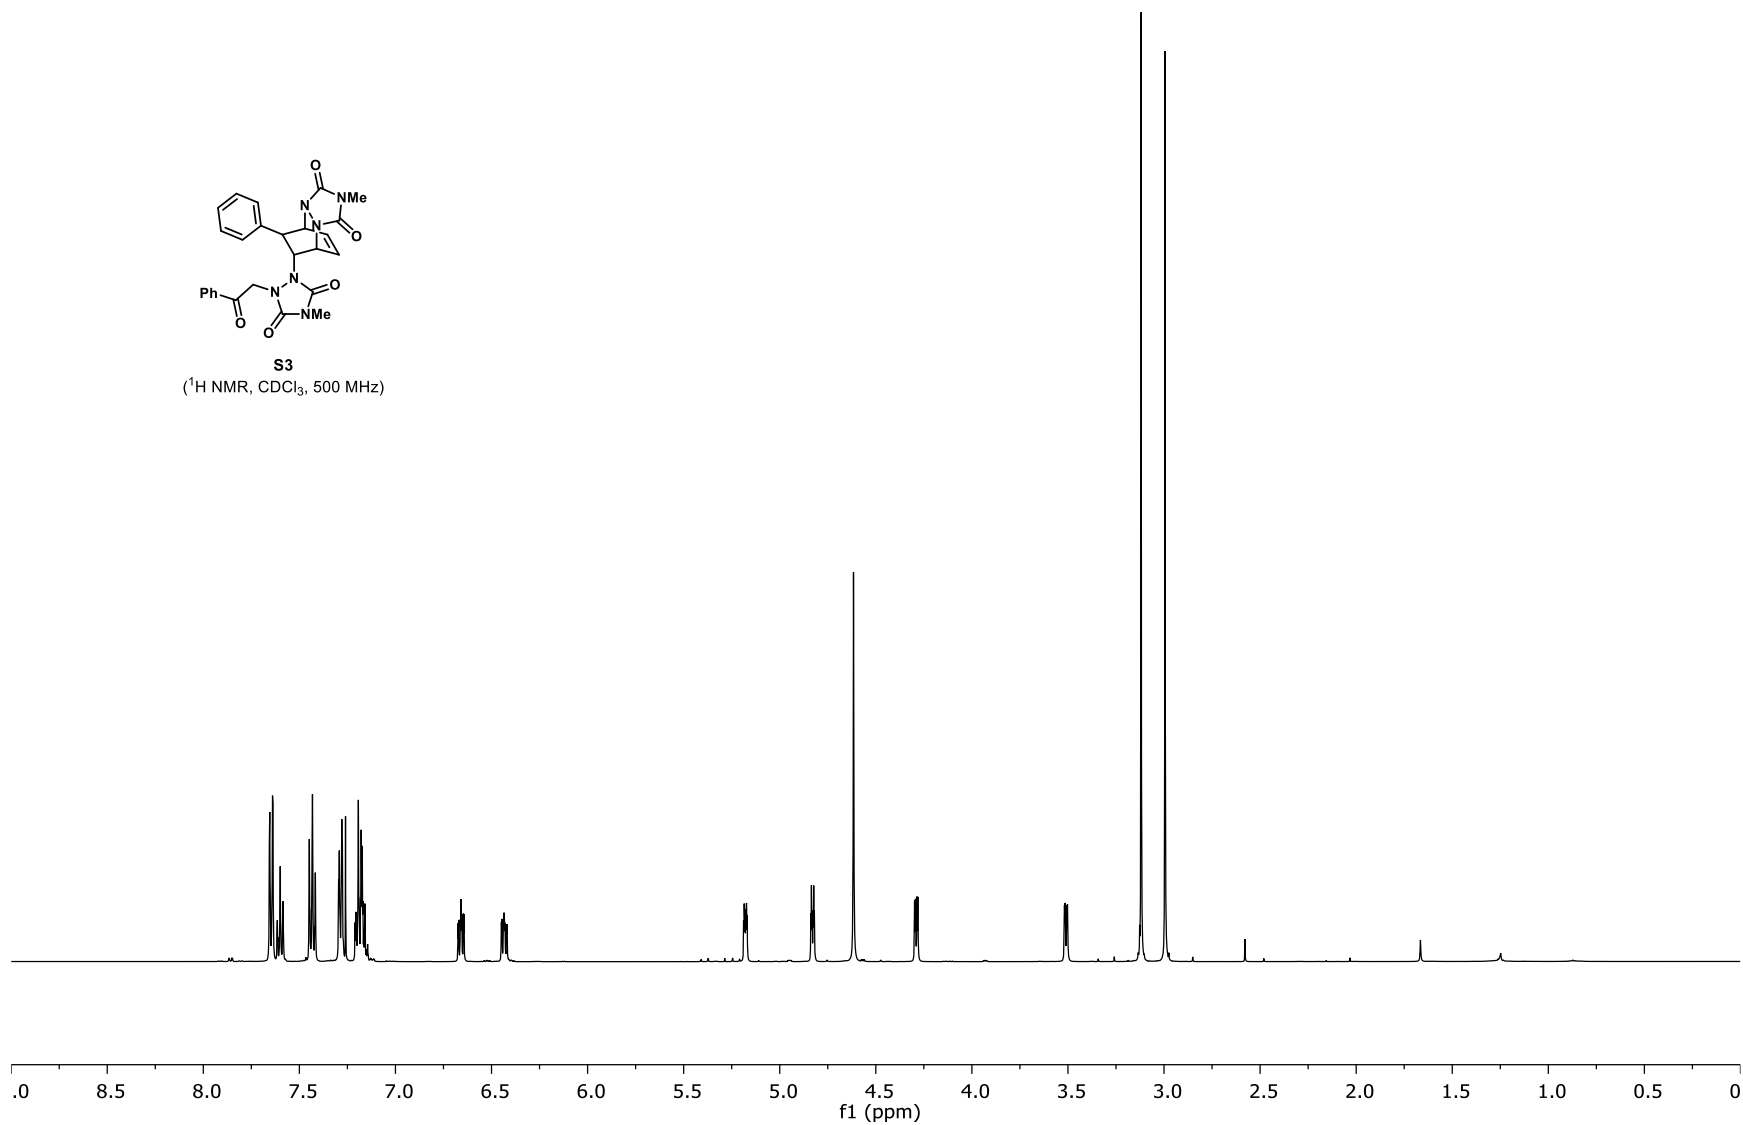

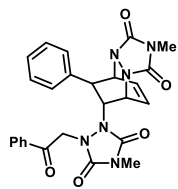

S3

(<sup>13</sup>C NMR, CDCl<sub>3</sub>, 126 MHz)

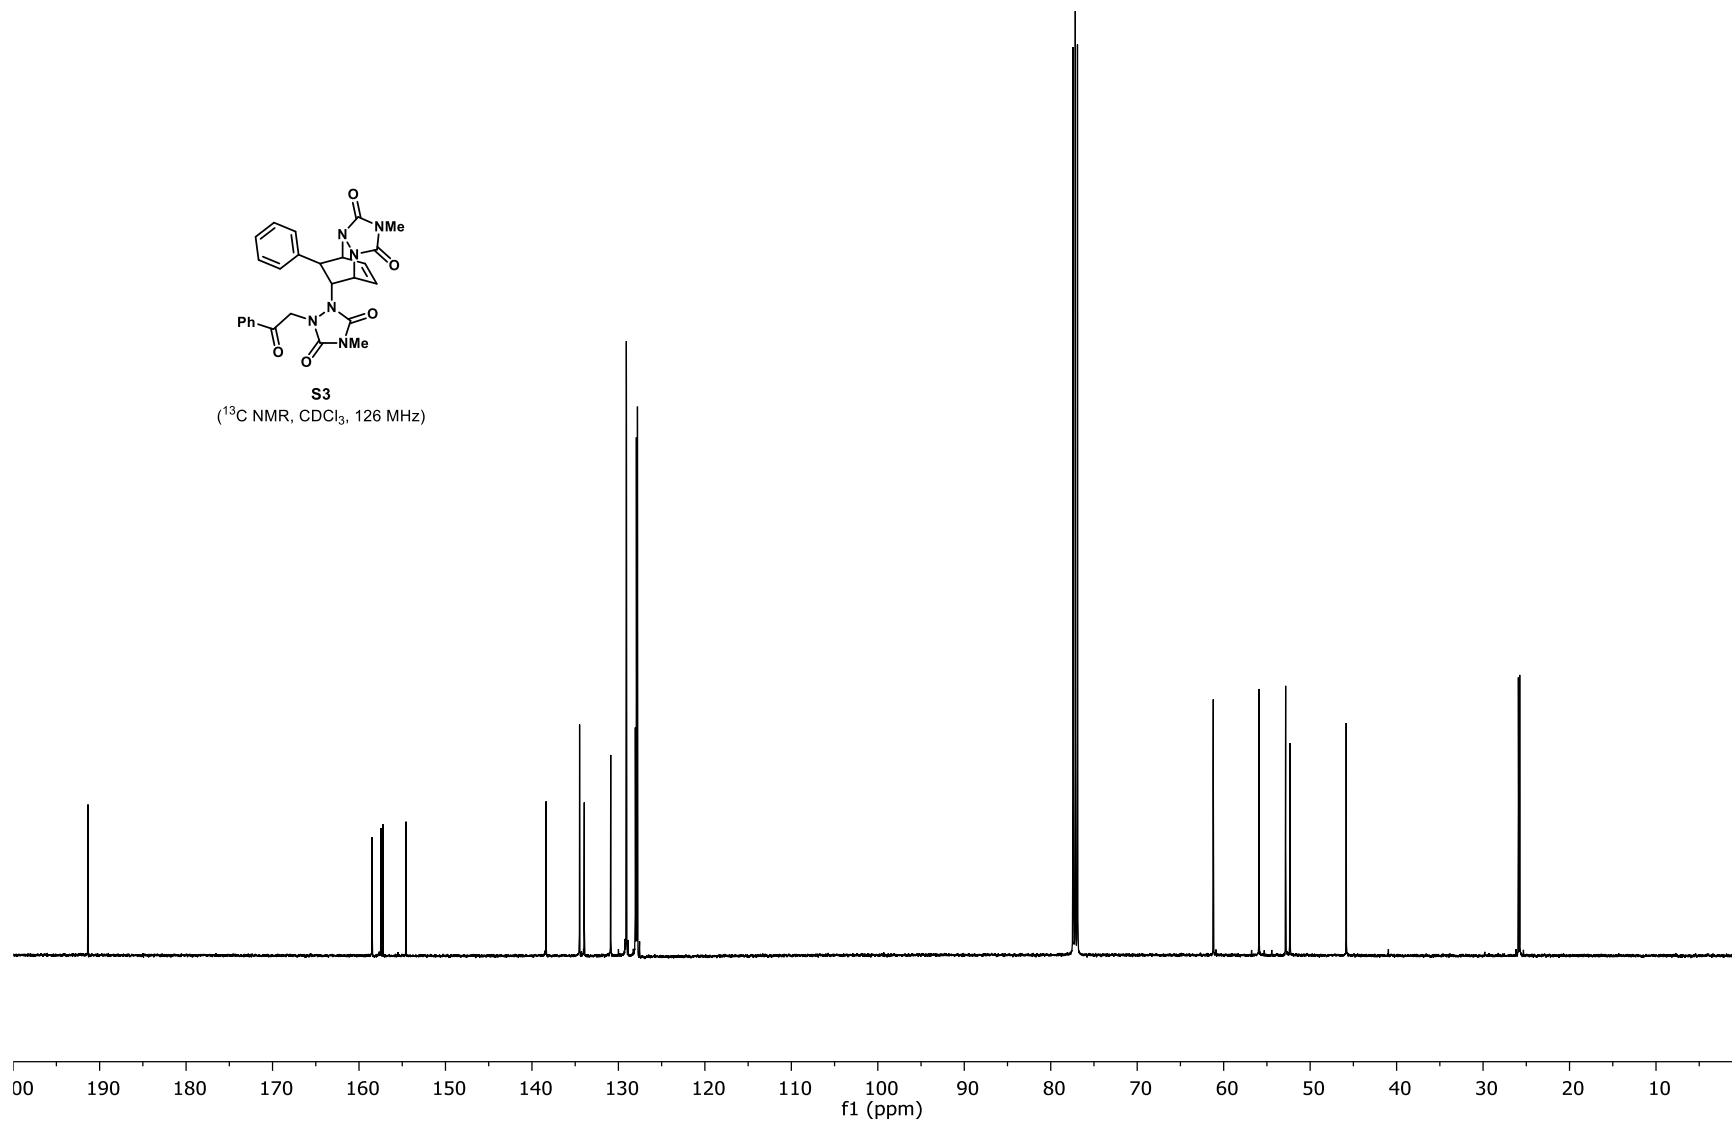

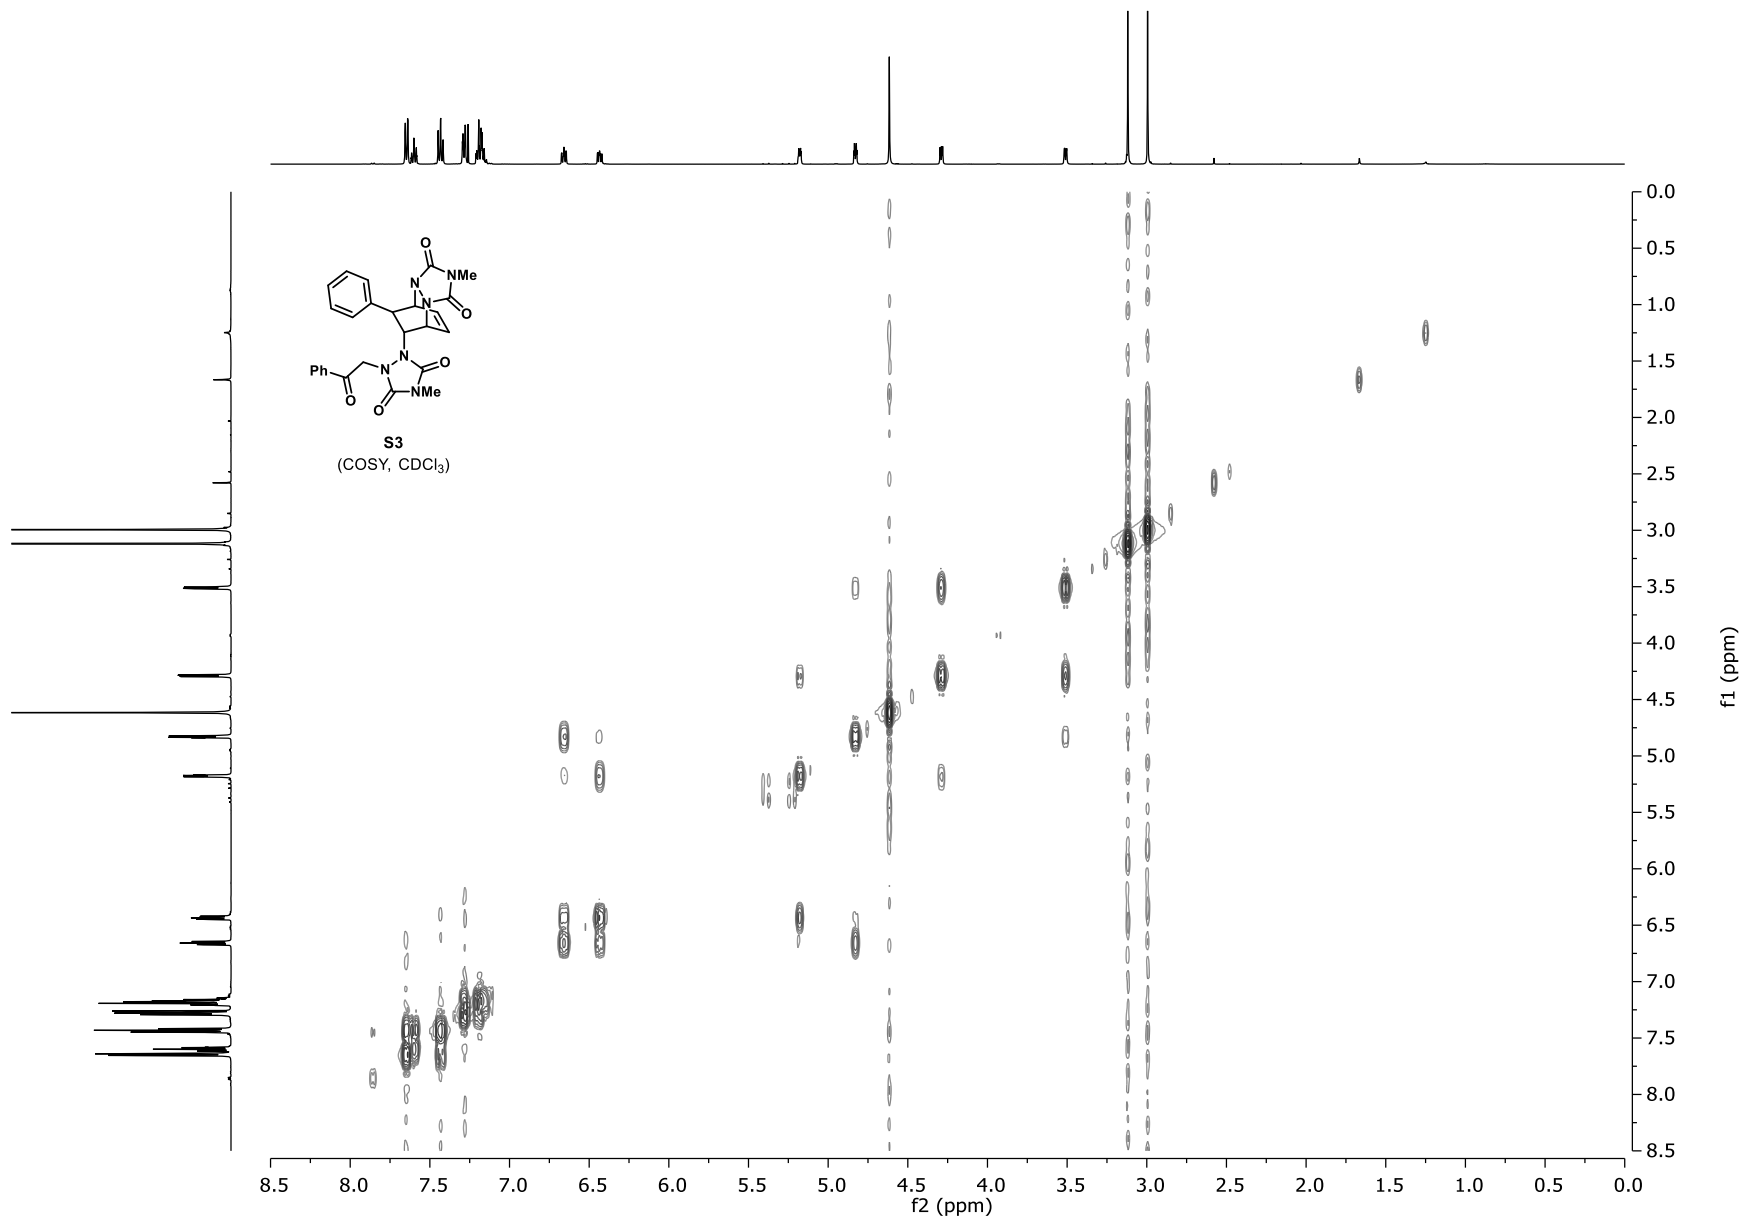

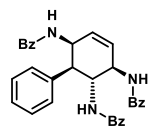

6  
(<sup>1</sup>H NMR, MeOD, 500 MHz)

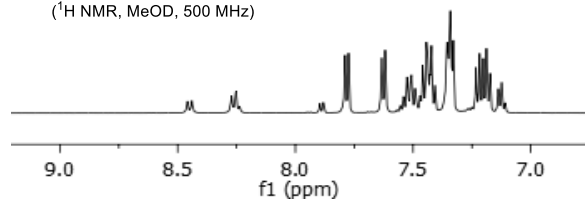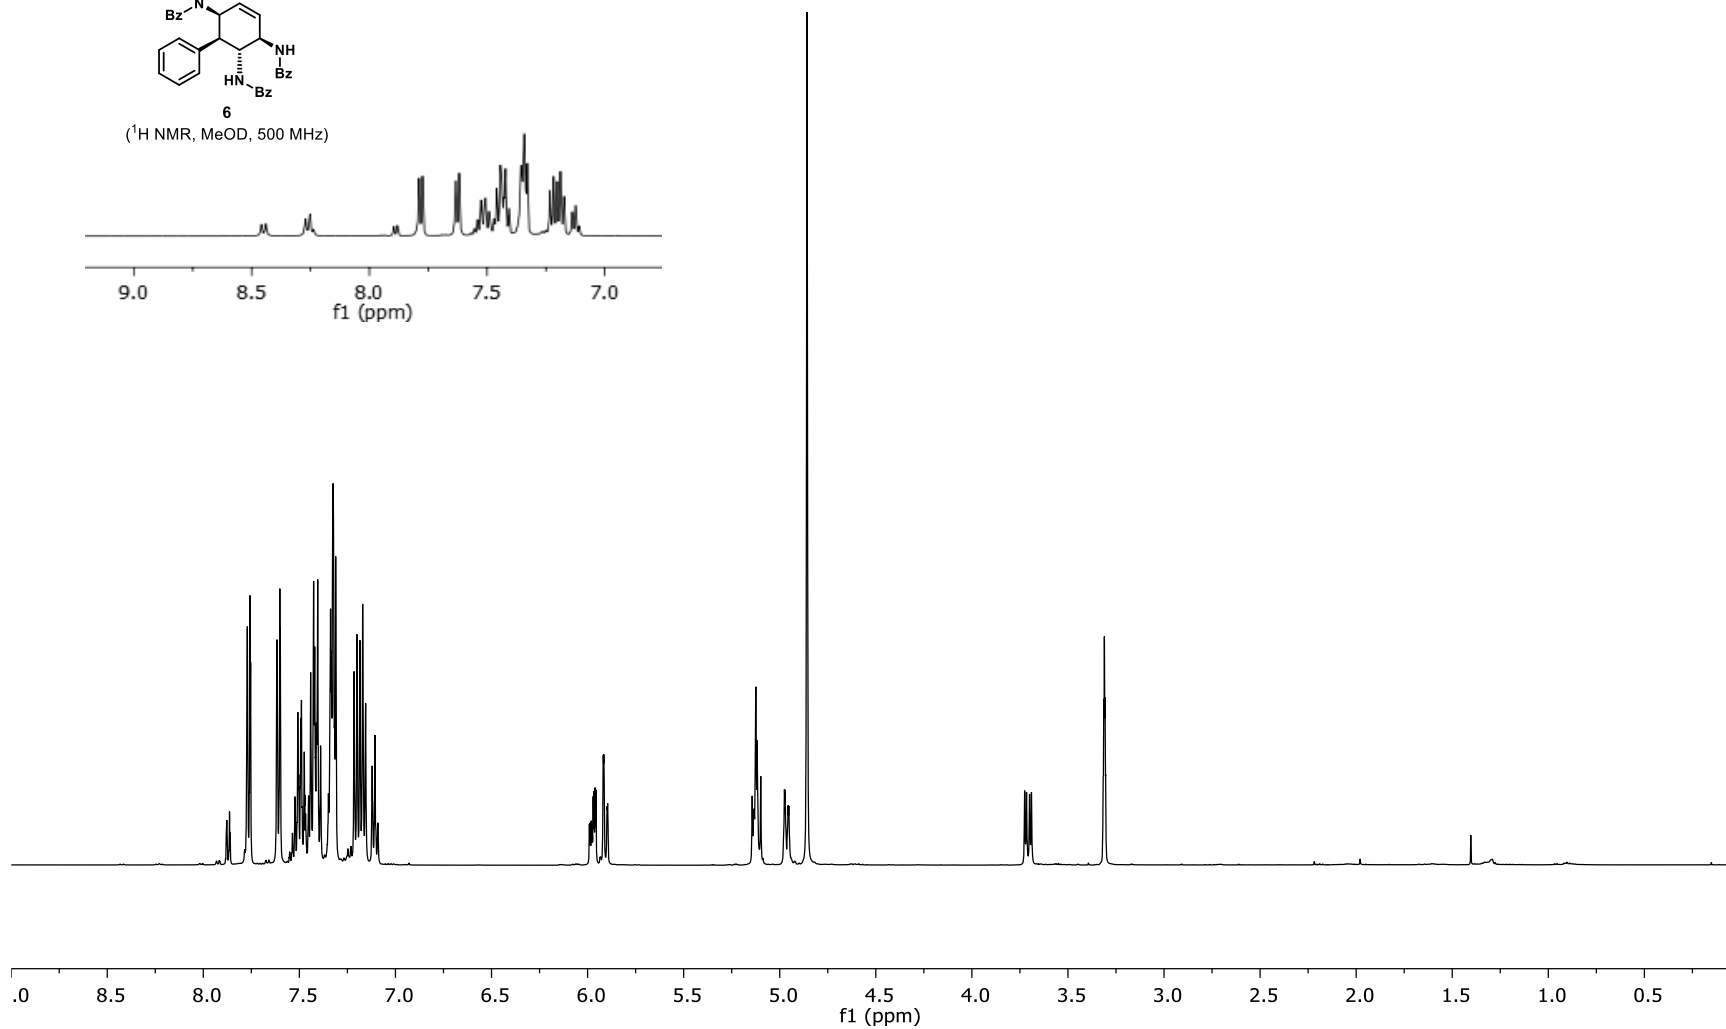

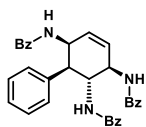

6

(<sup>13</sup>C NMR, MeOD, 126 MHz)

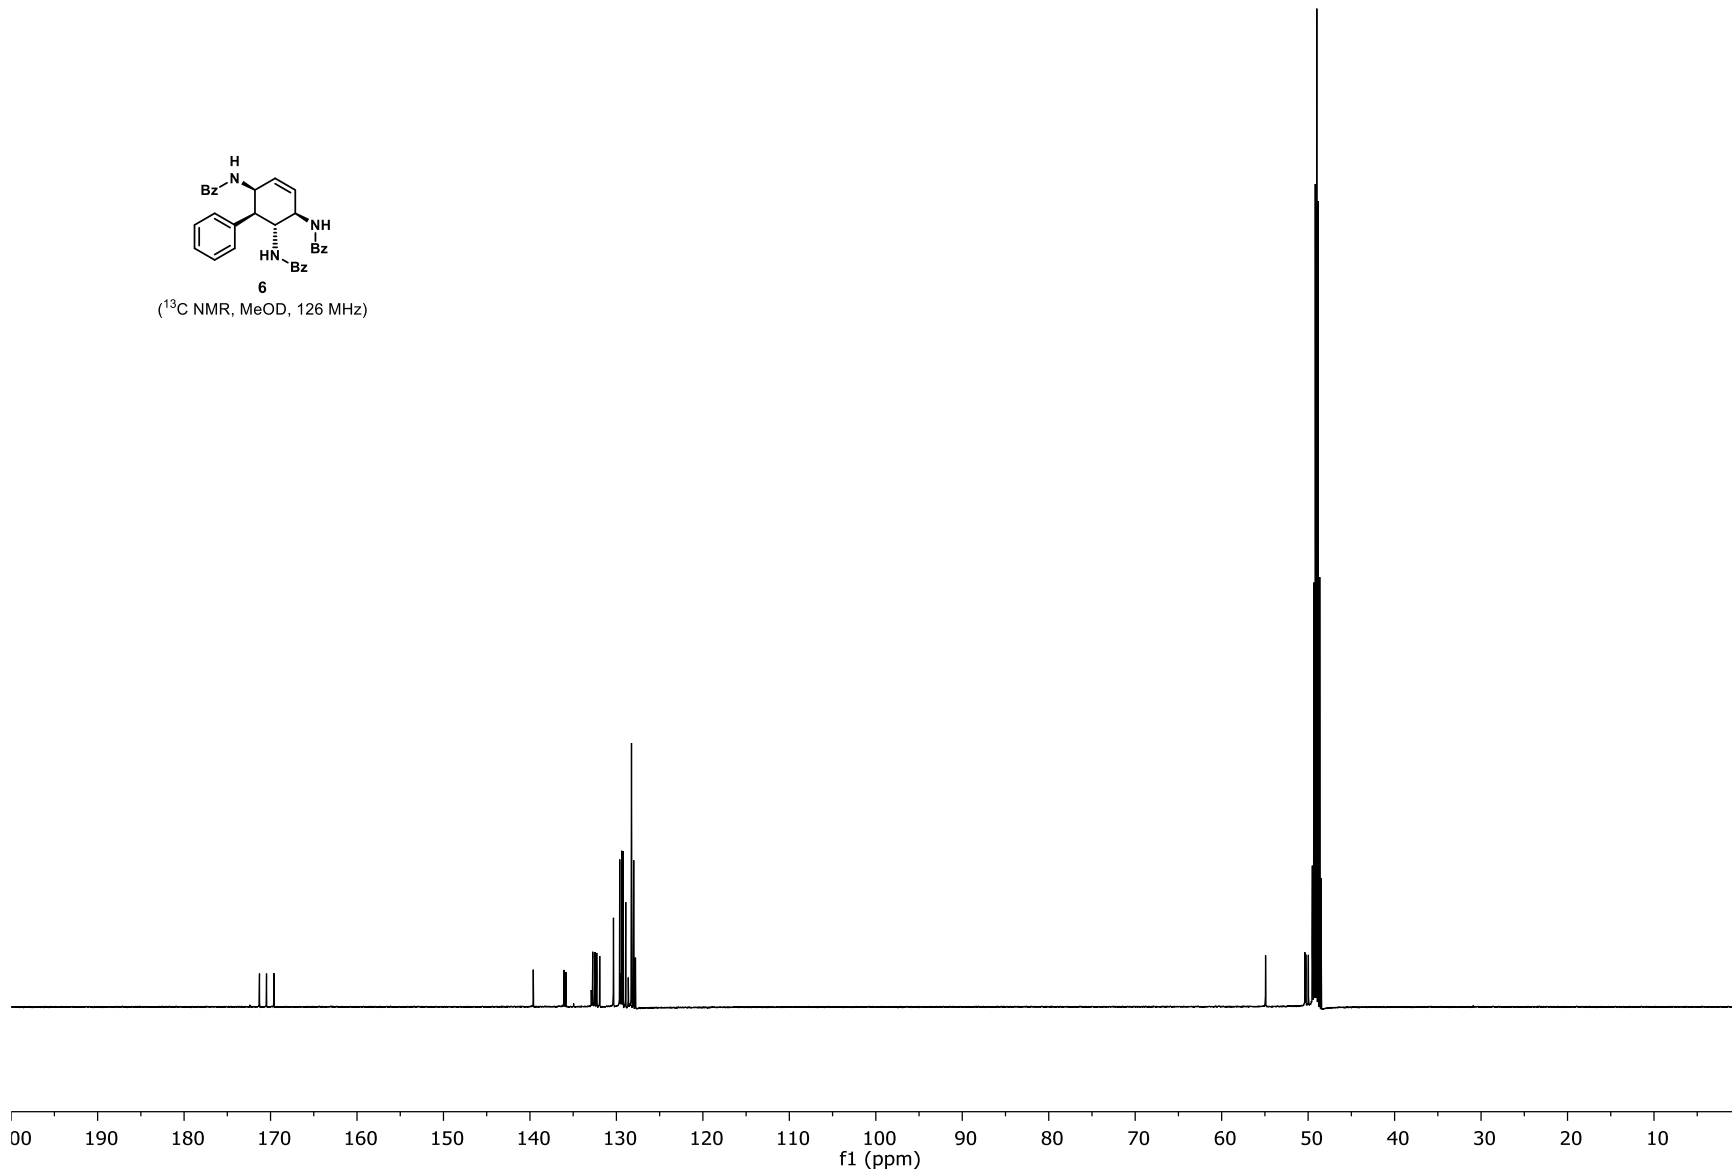

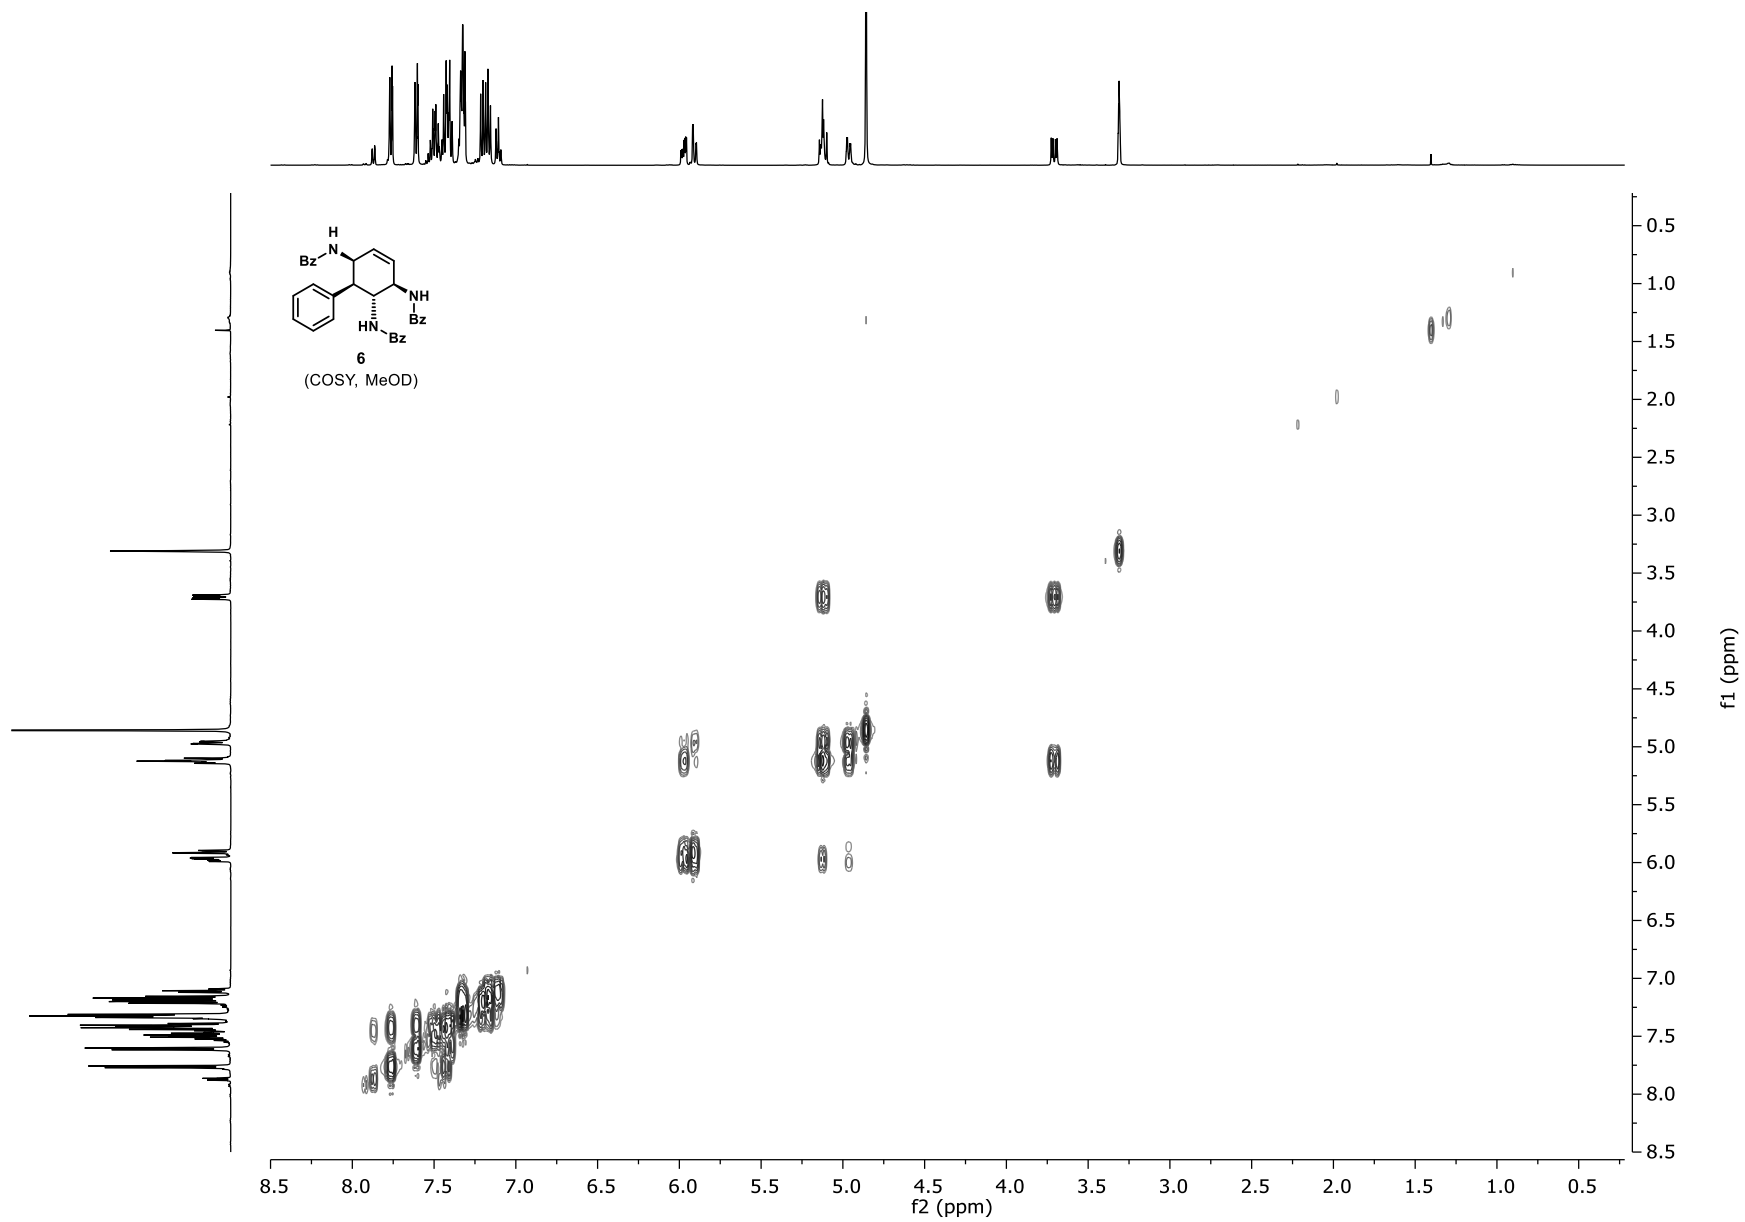

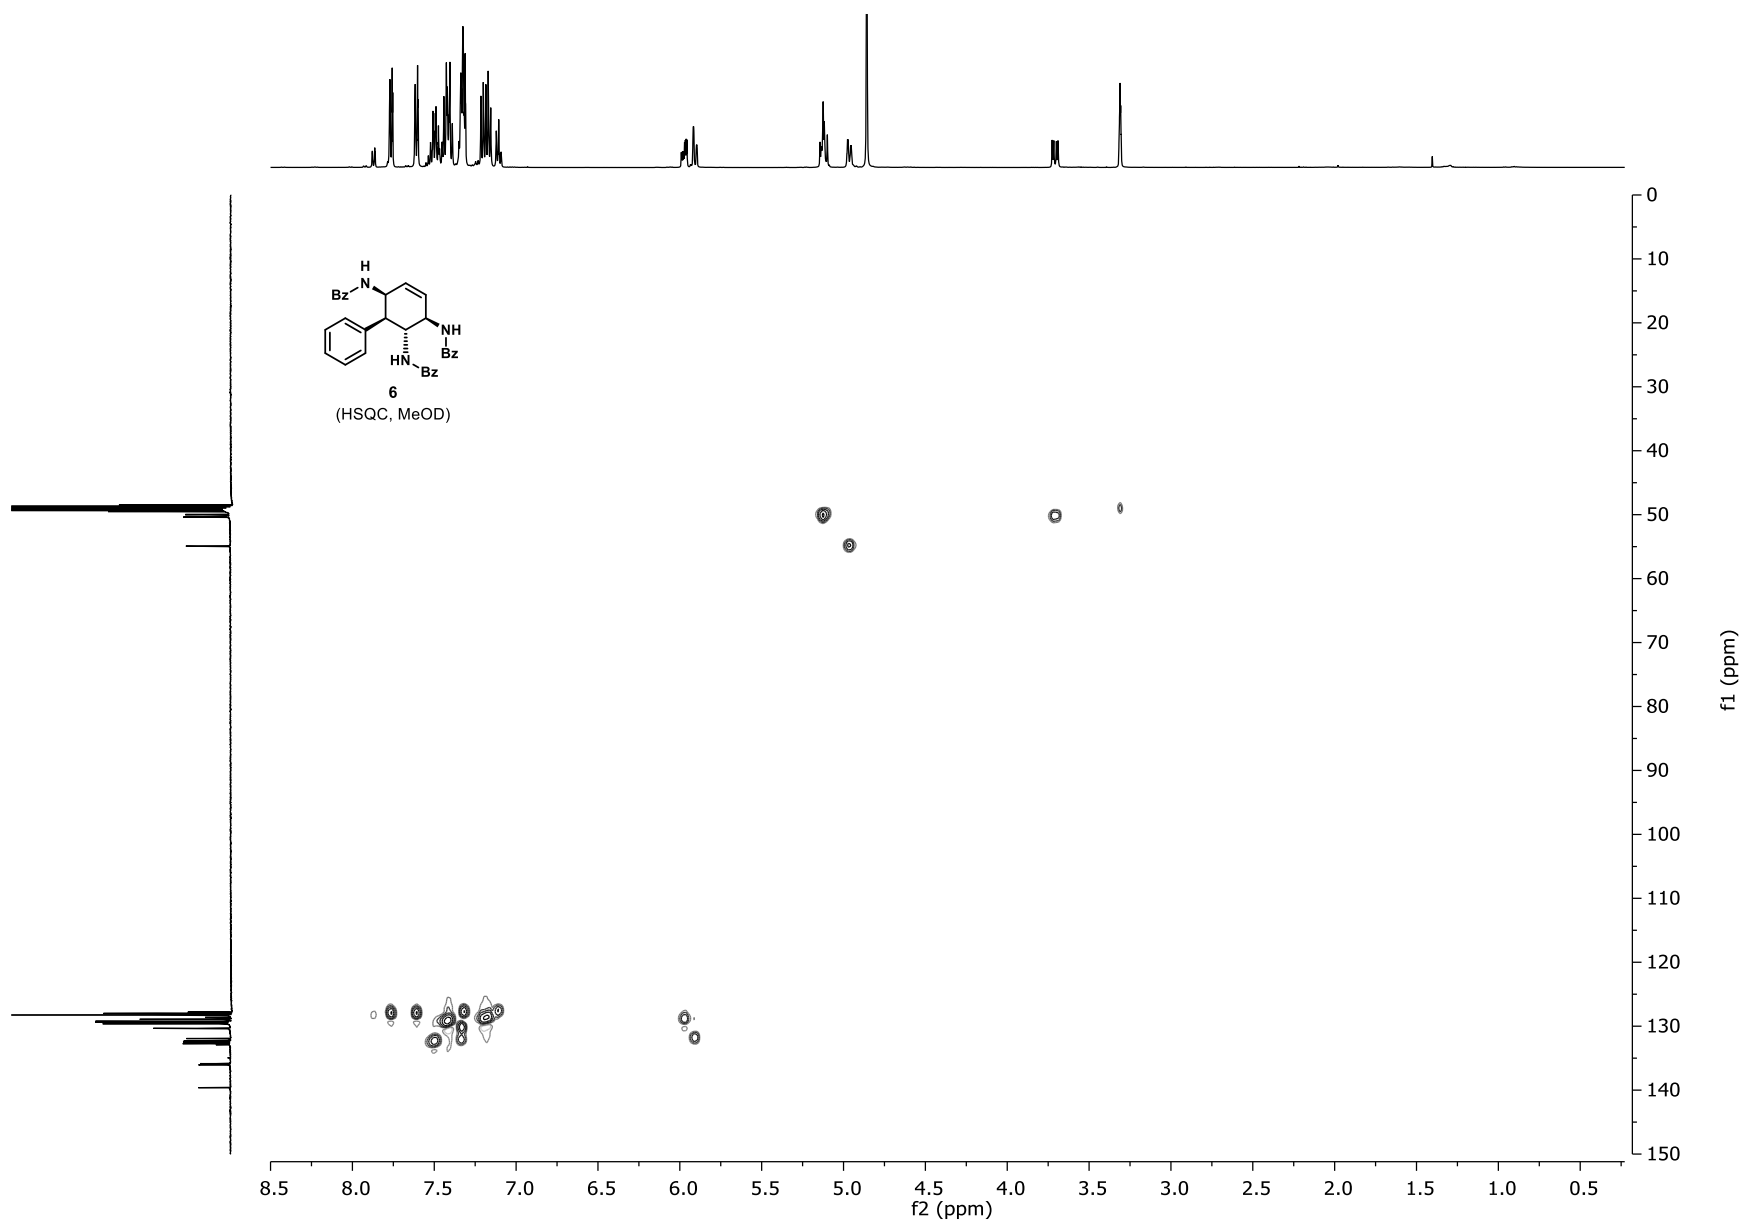

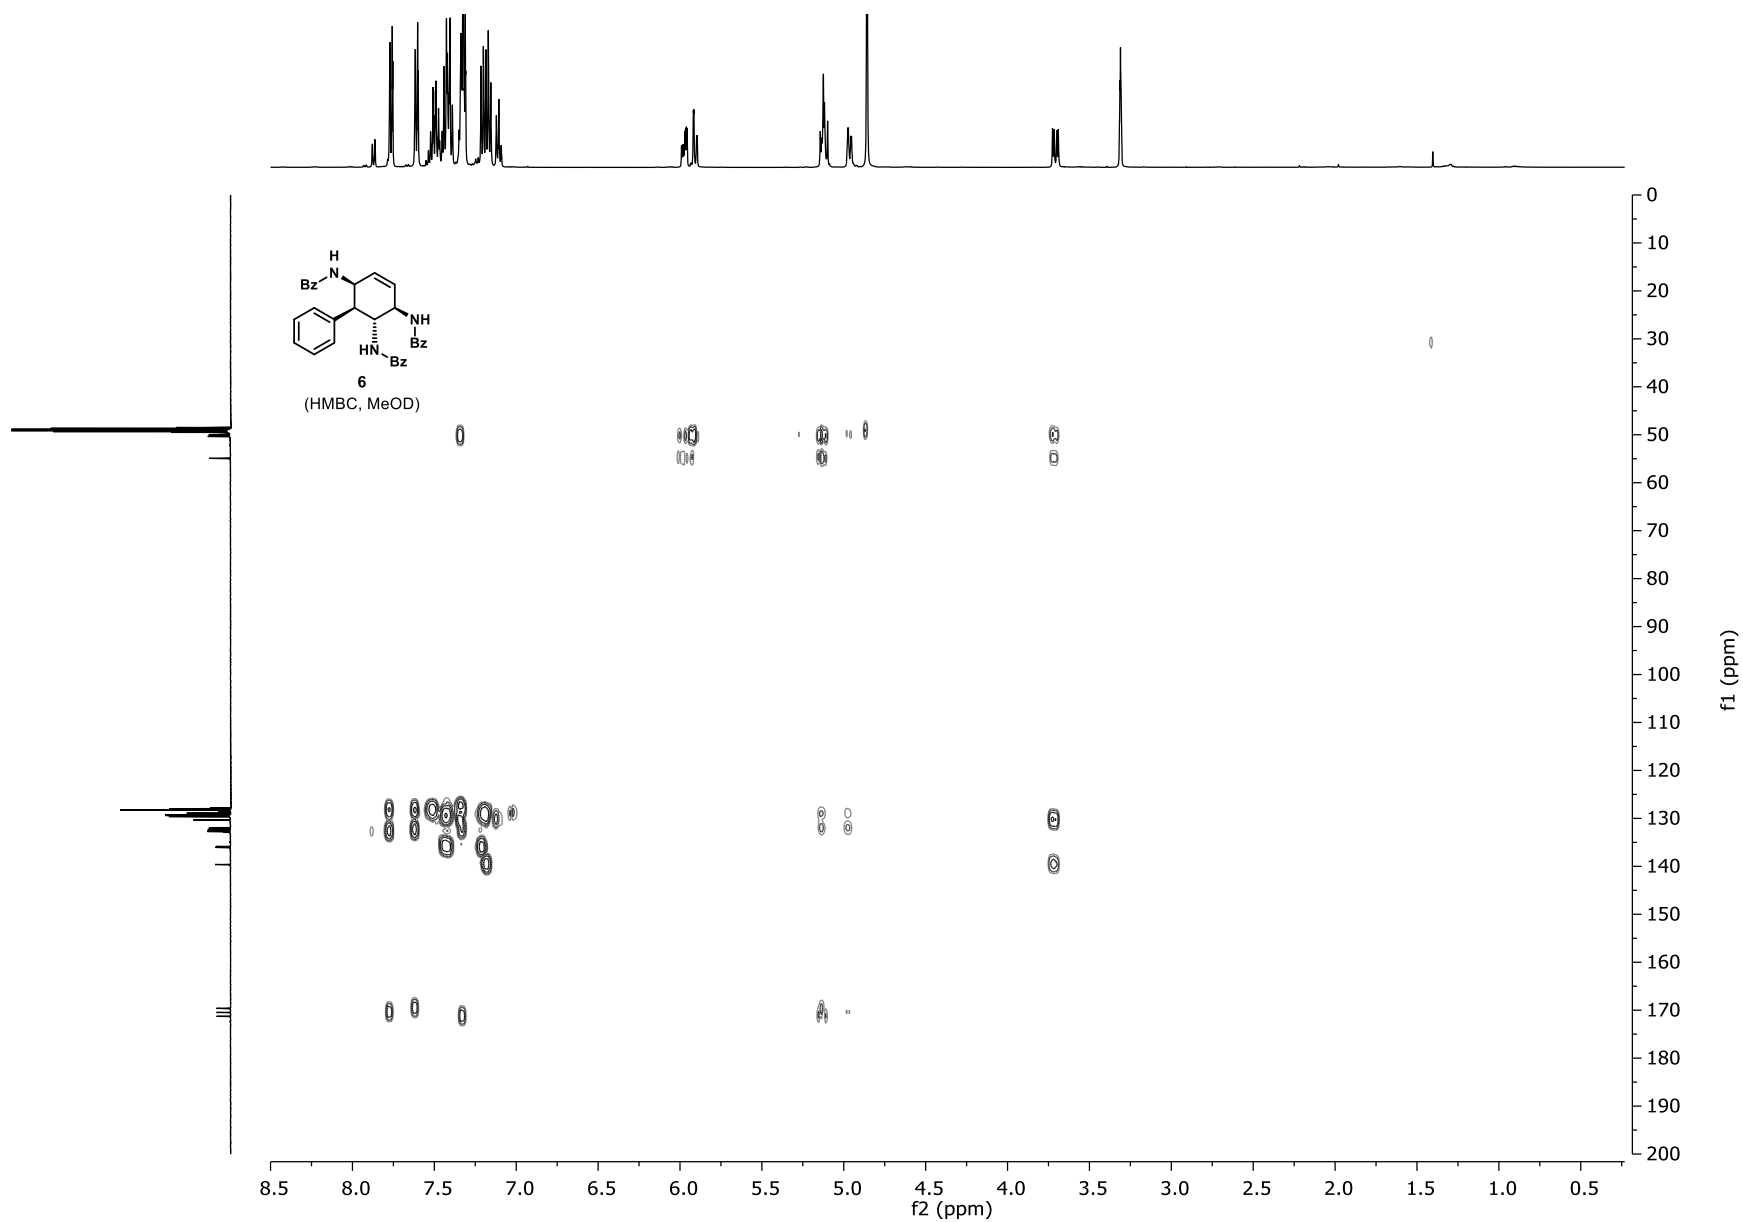



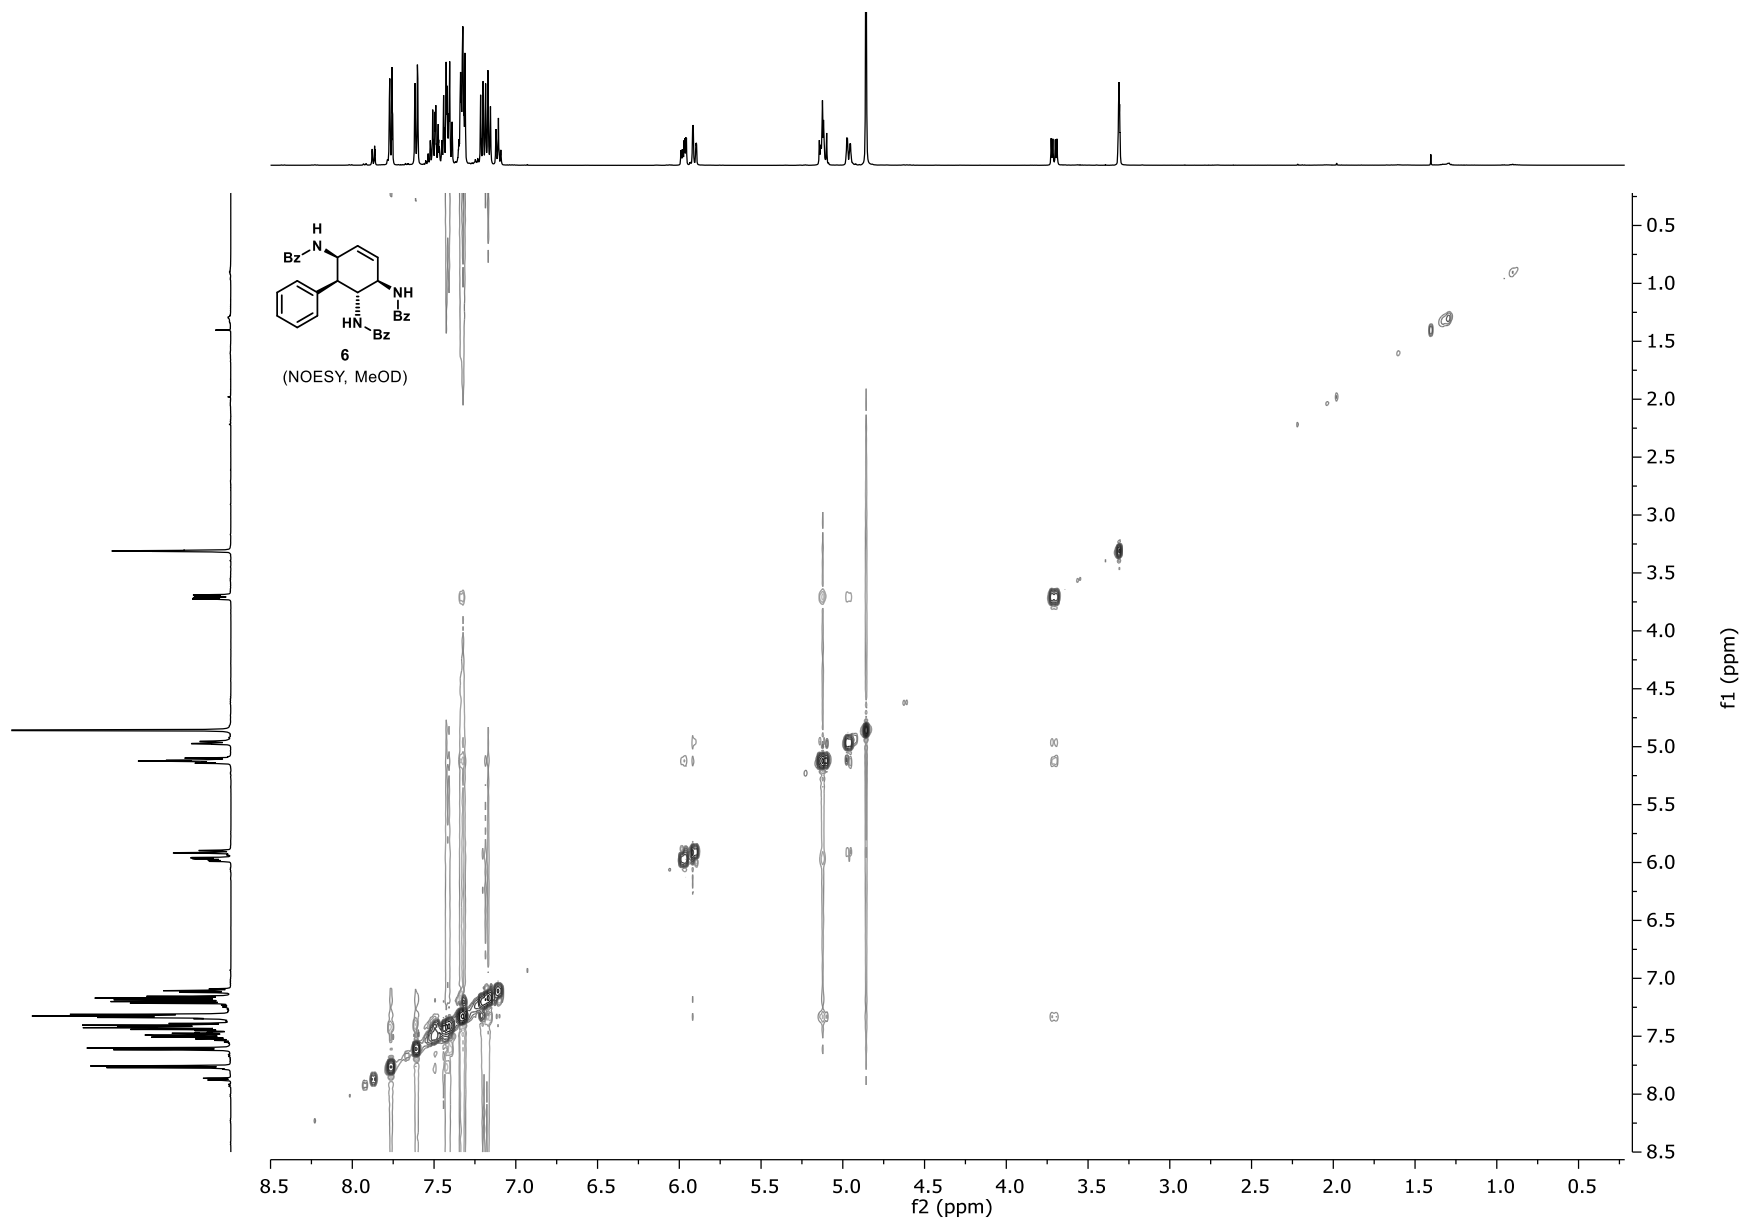

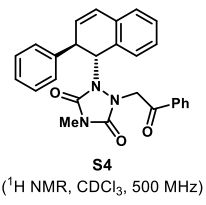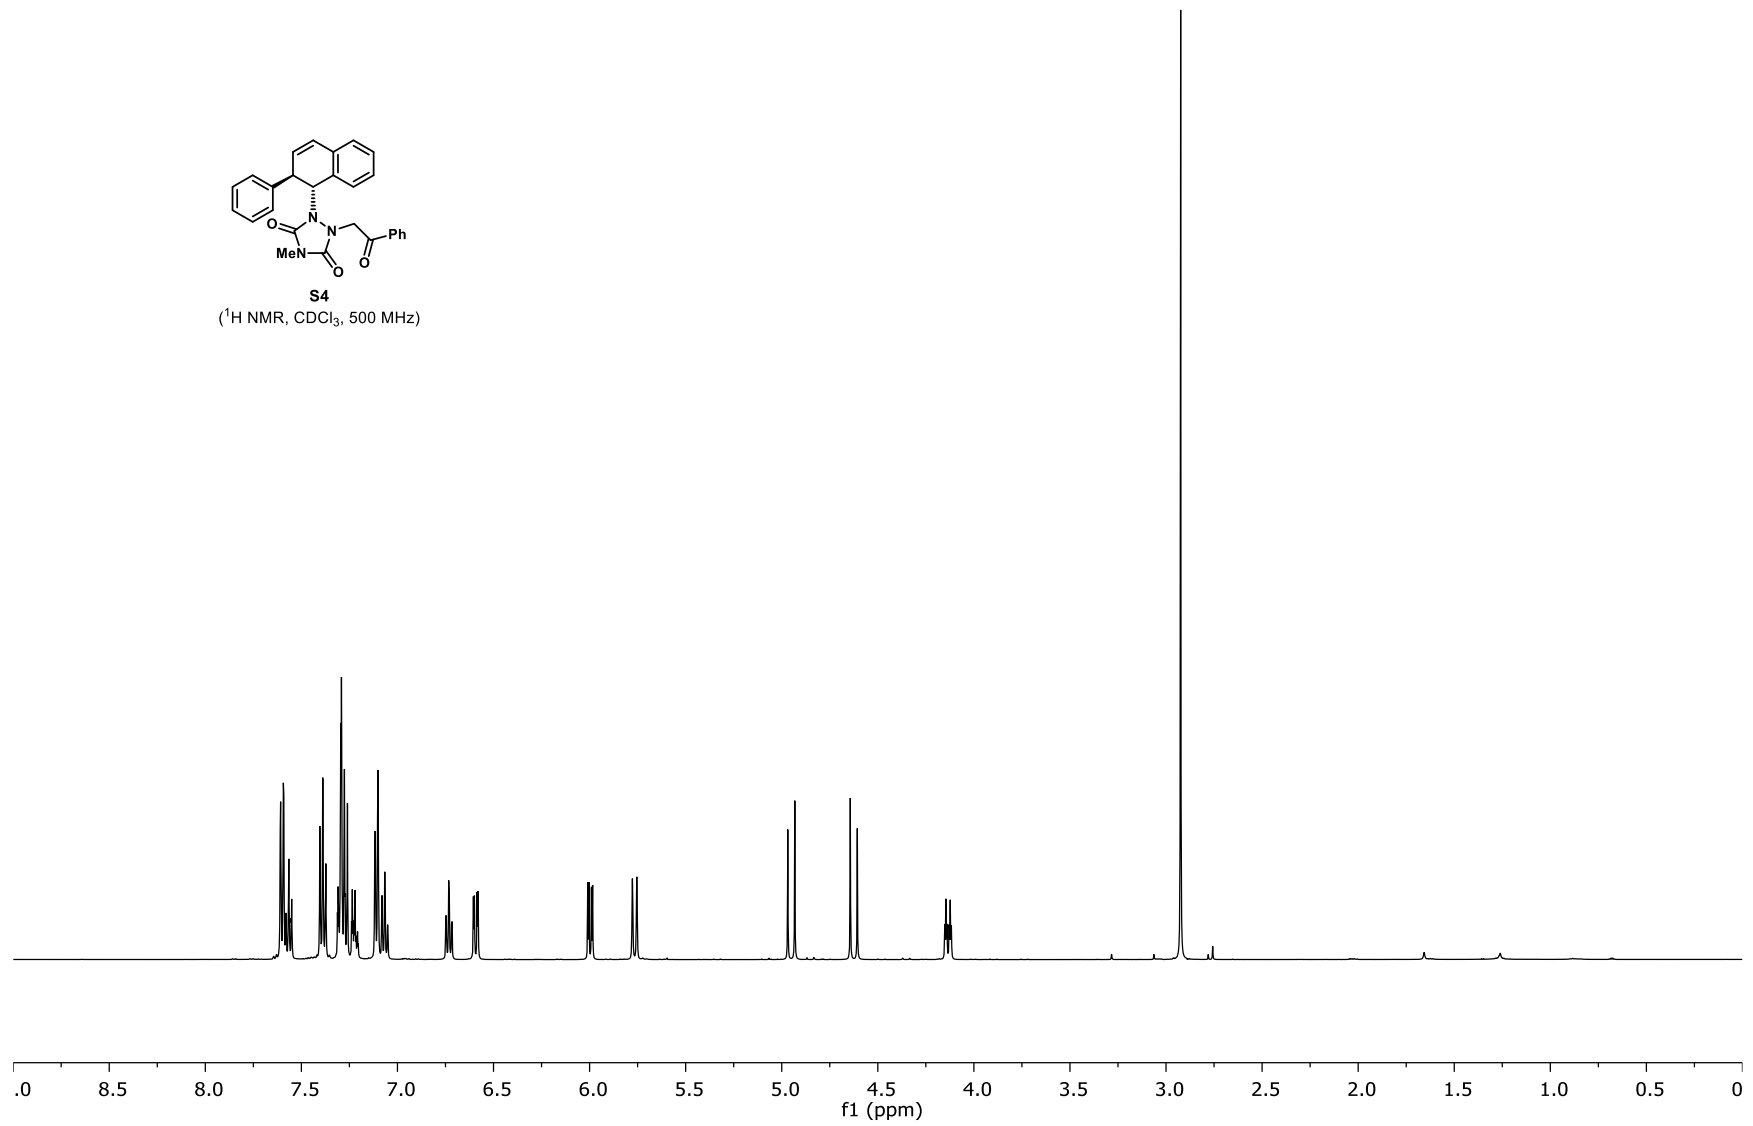

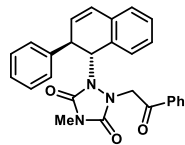

S4  
(<sup>13</sup>C NMR, CDCl<sub>3</sub>, 126 MHz)

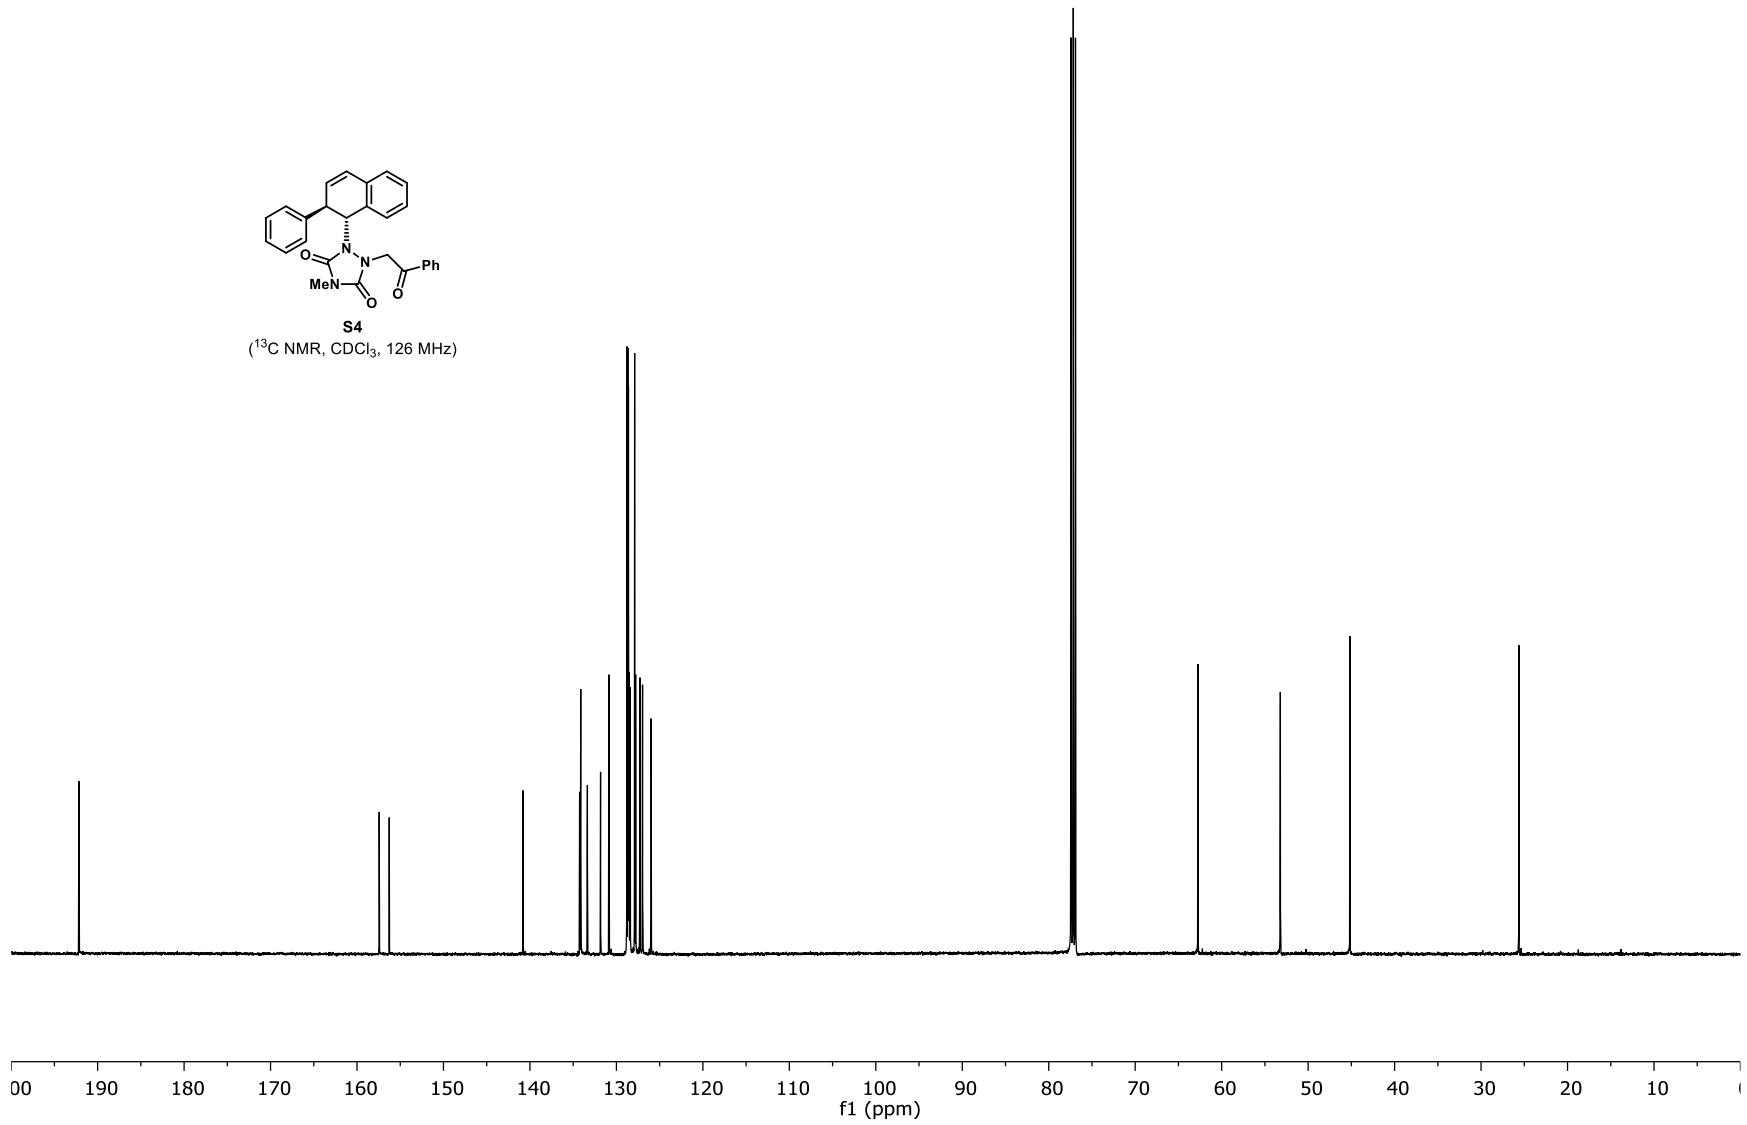

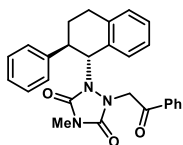

**S5**  
(<sup>1</sup>H NMR, CDCl<sub>3</sub>, 500 MHz)

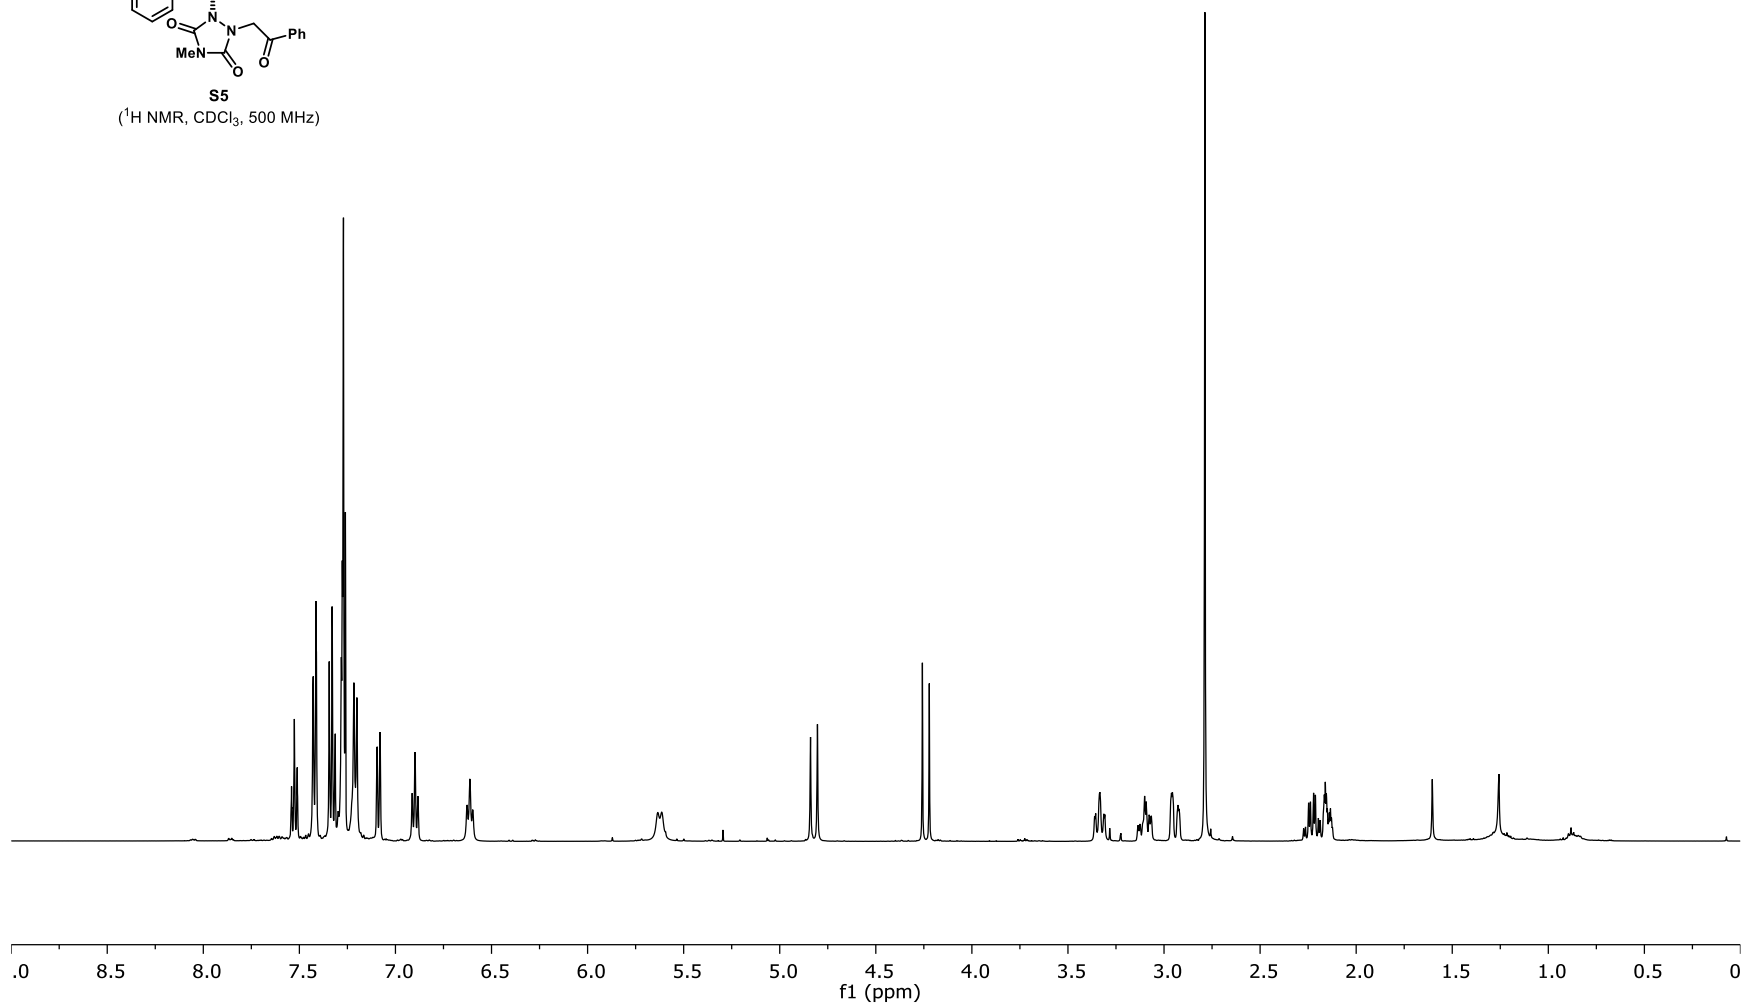

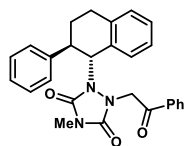

**S5**  
(<sup>13</sup>C NMR, CDCl<sub>3</sub>, 126 MHz)

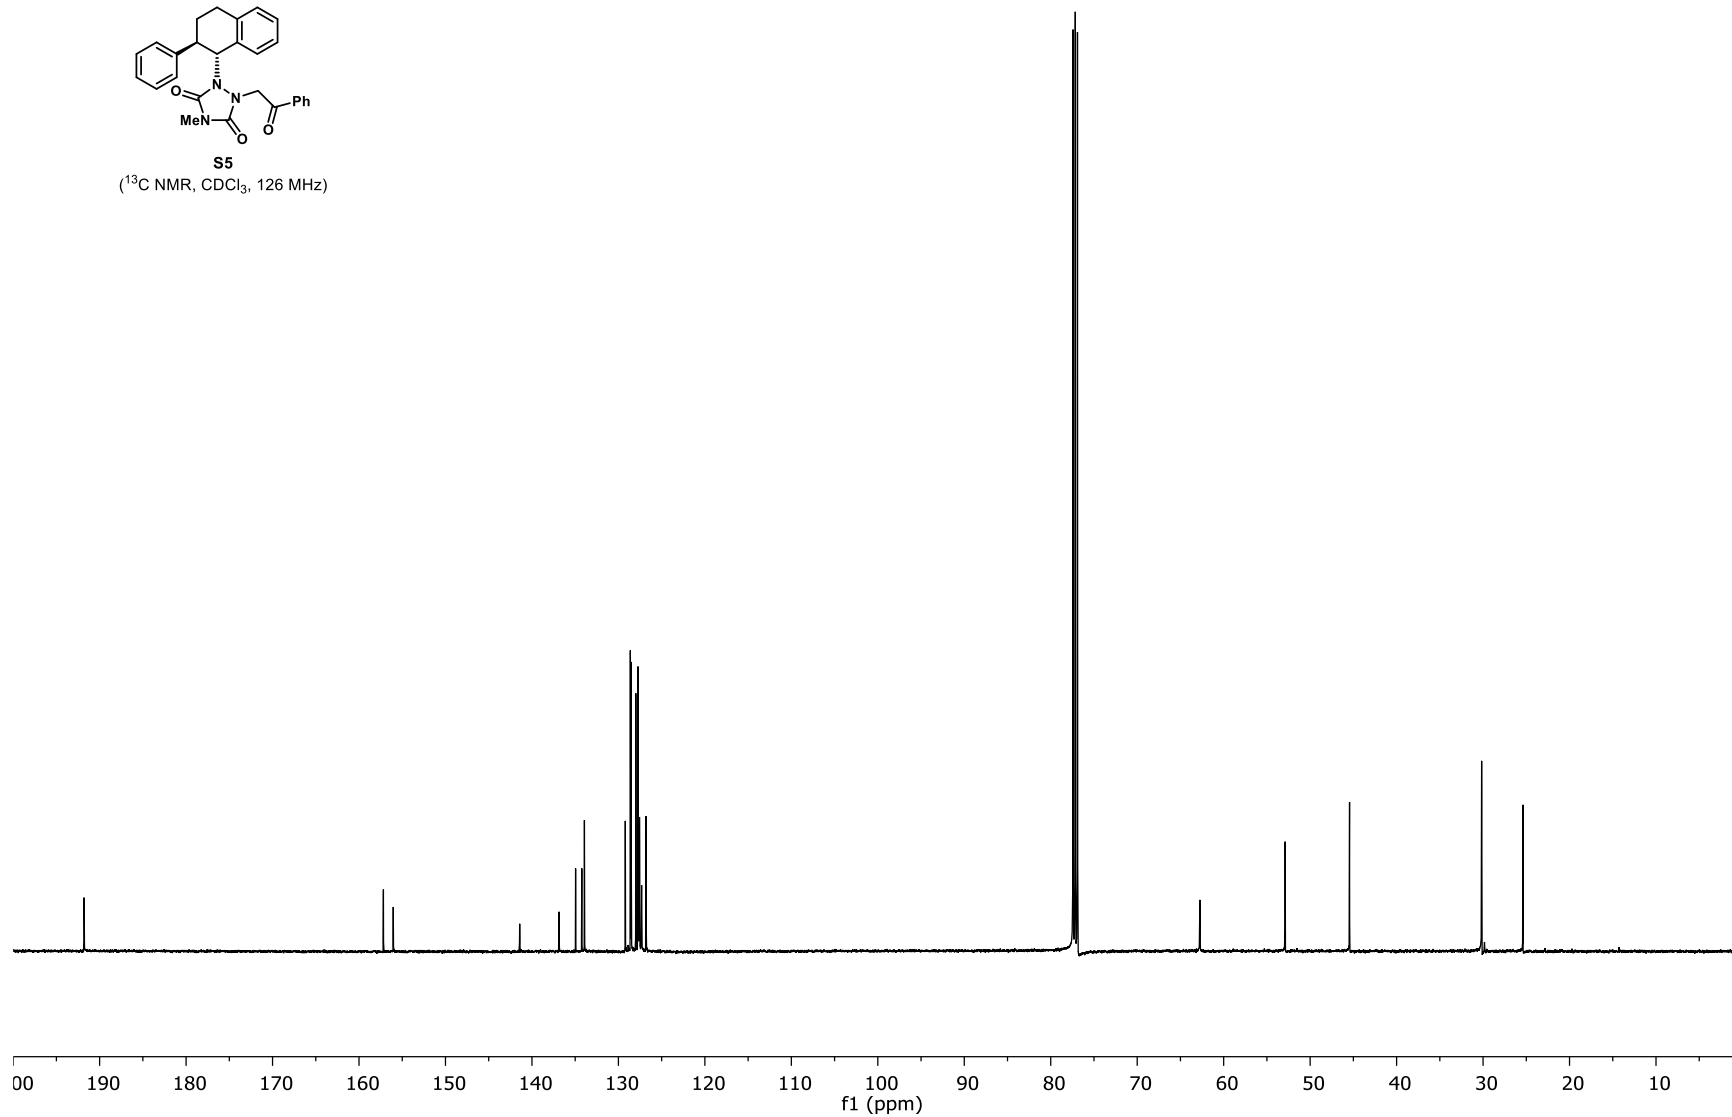

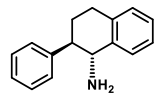

7  
(<sup>1</sup>H NMR, CDCl<sub>3</sub>, 500 MHz)

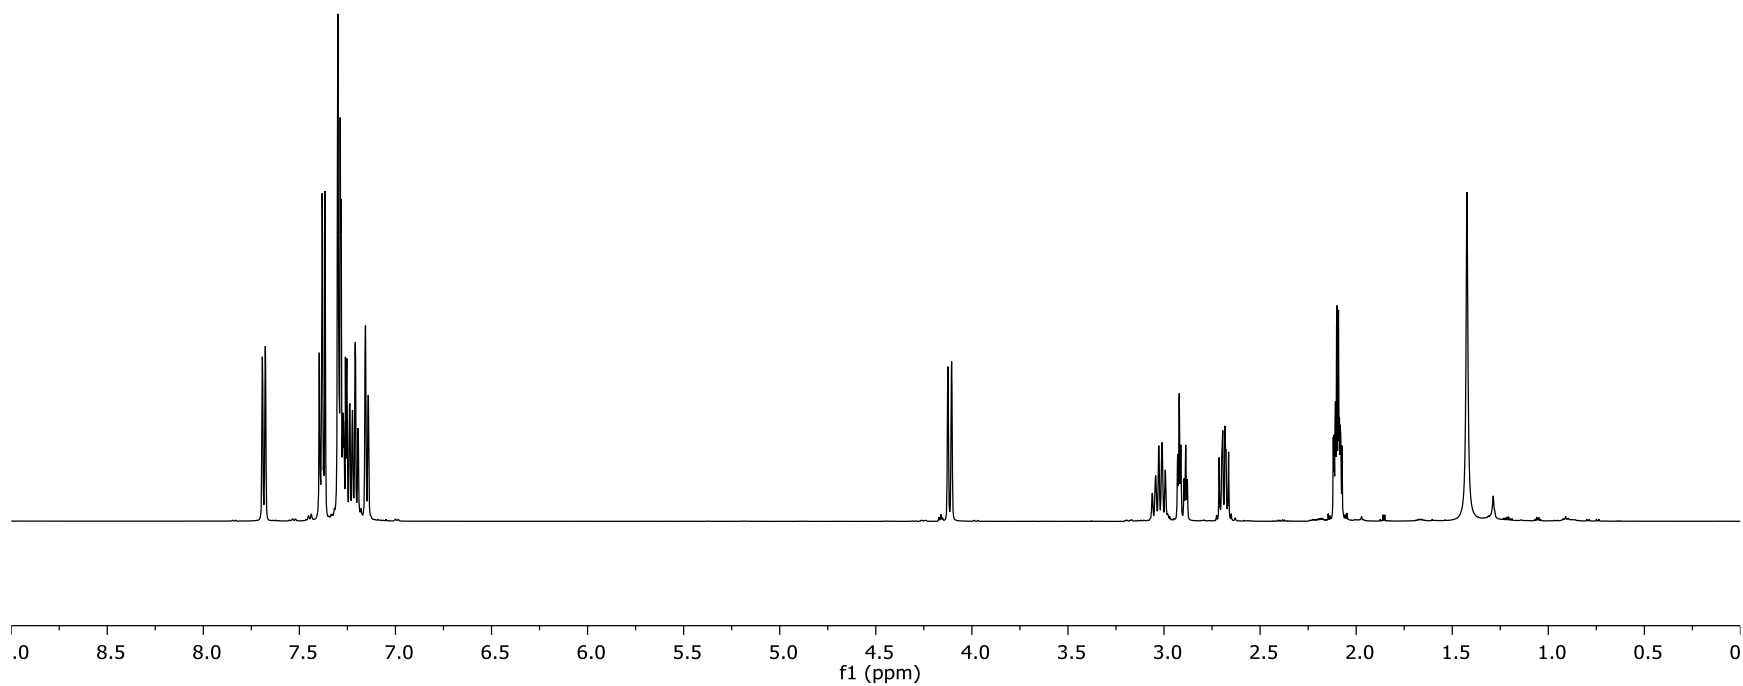

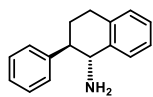

7  
(<sup>13</sup>C NMR, CDCl<sub>3</sub>, 126 MHz)

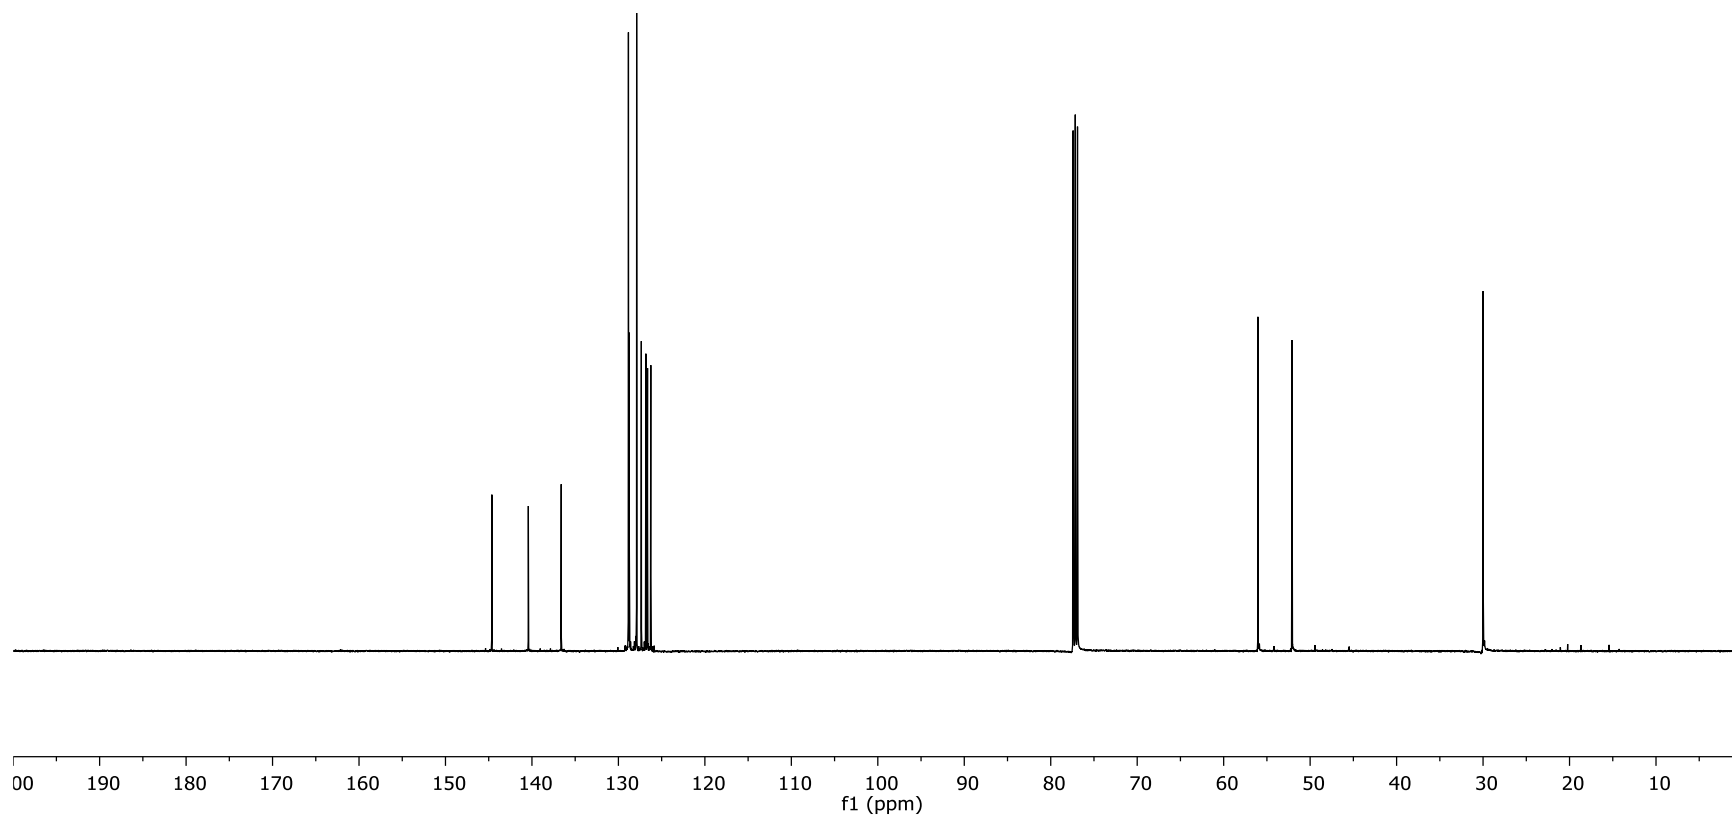

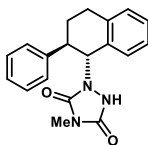

S6

(<sup>1</sup>H NMR, CDCl<sub>3</sub>, 500 MHz)

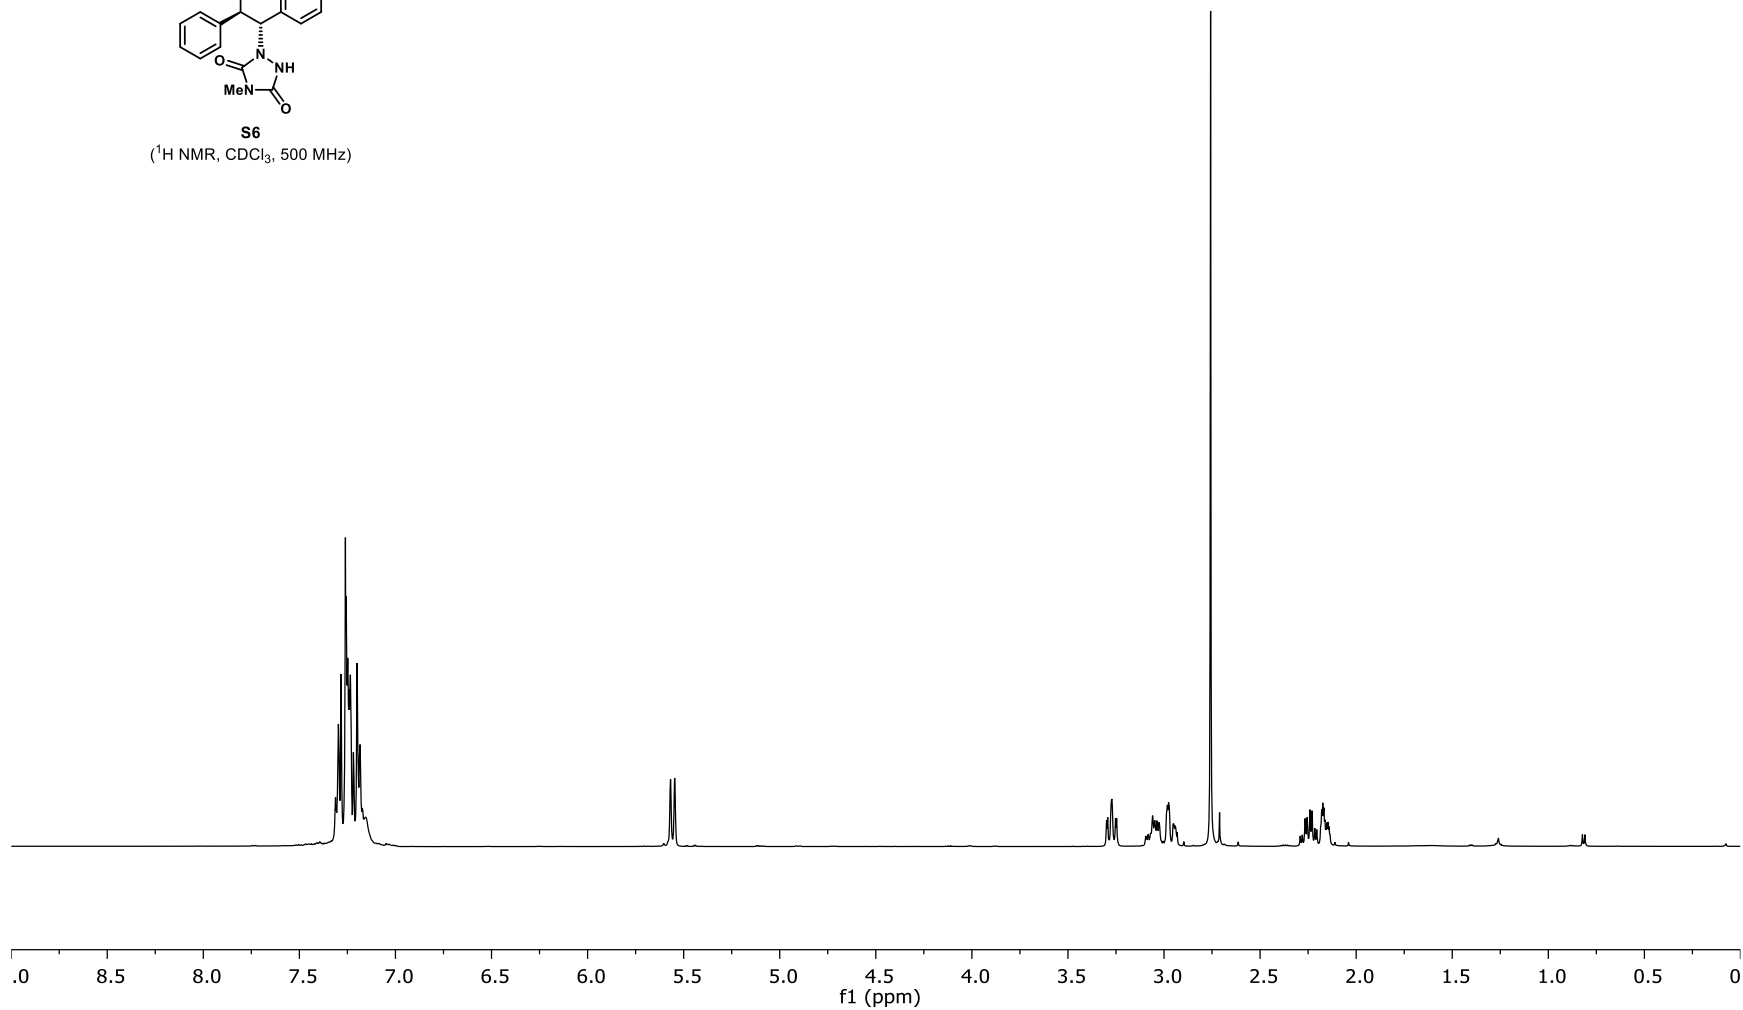



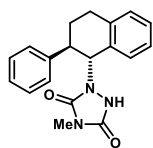

S6

(<sup>13</sup>C NMR, CDCl<sub>3</sub>, 126 MHz)

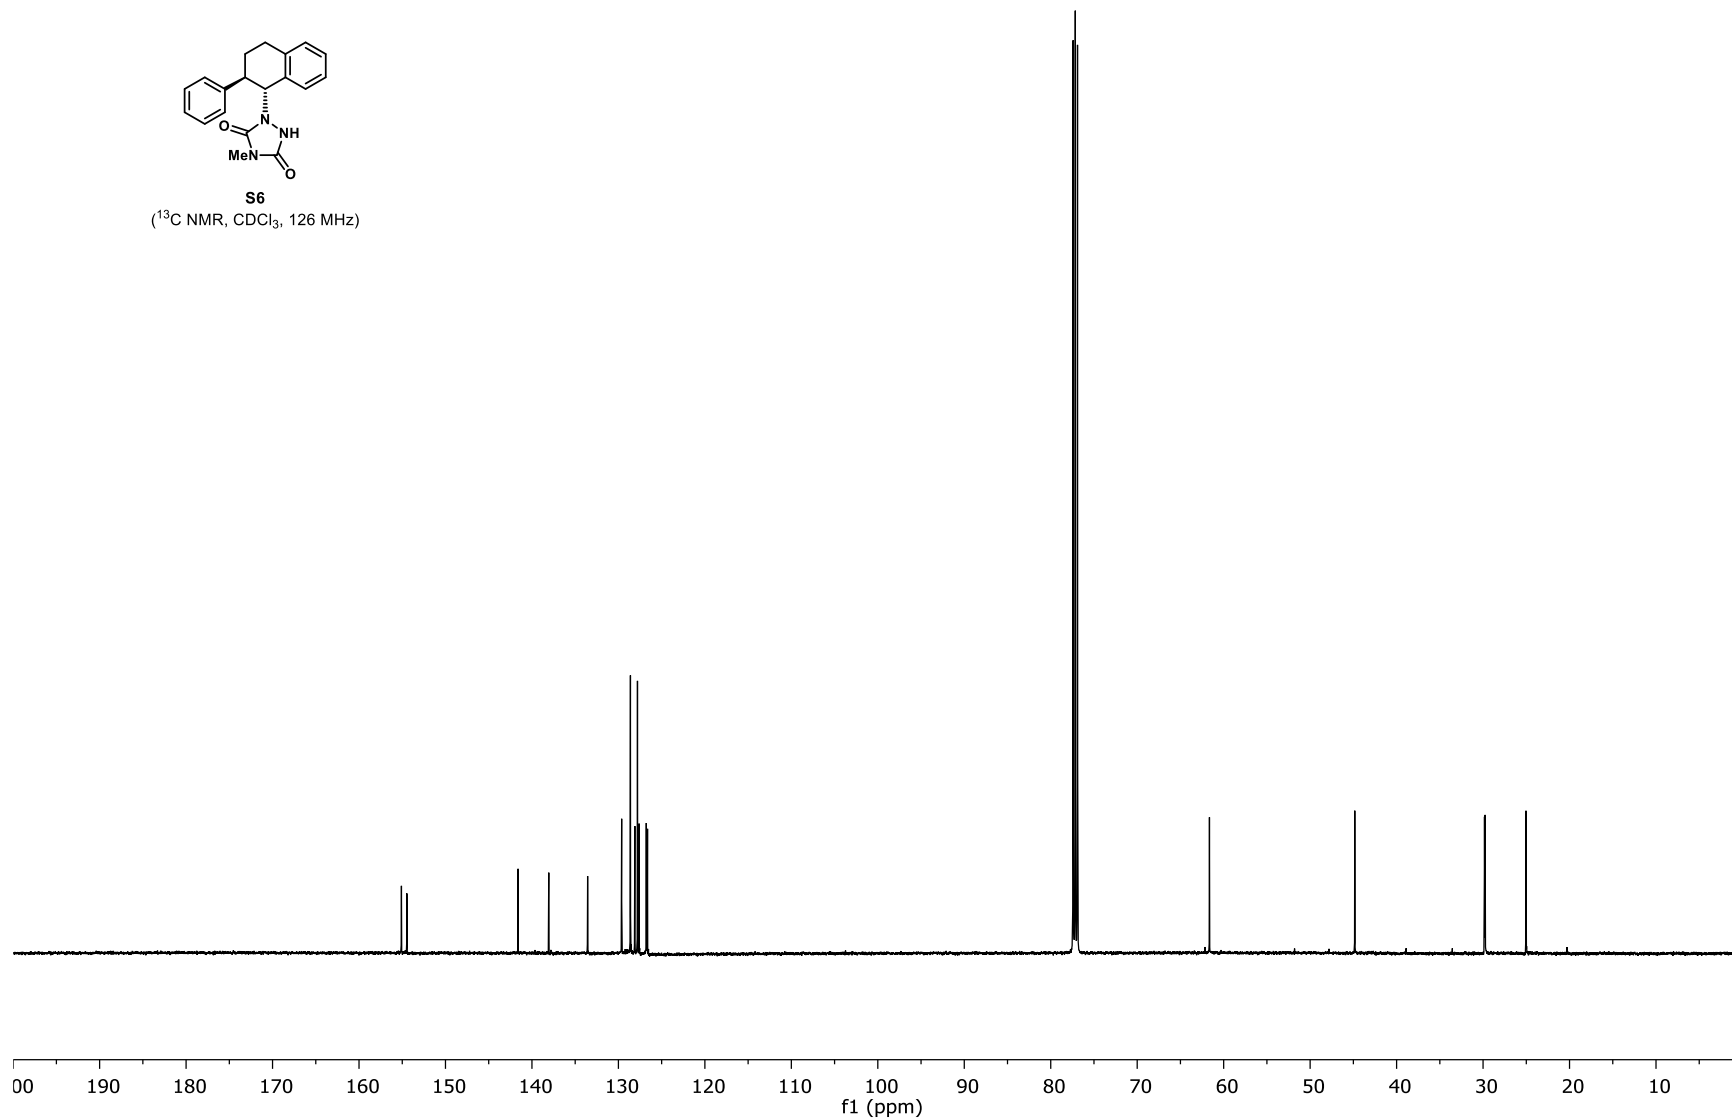

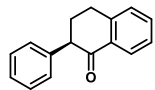

**8**

(<sup>1</sup>H NMR, CDCl<sub>3</sub>, 500 MHz)

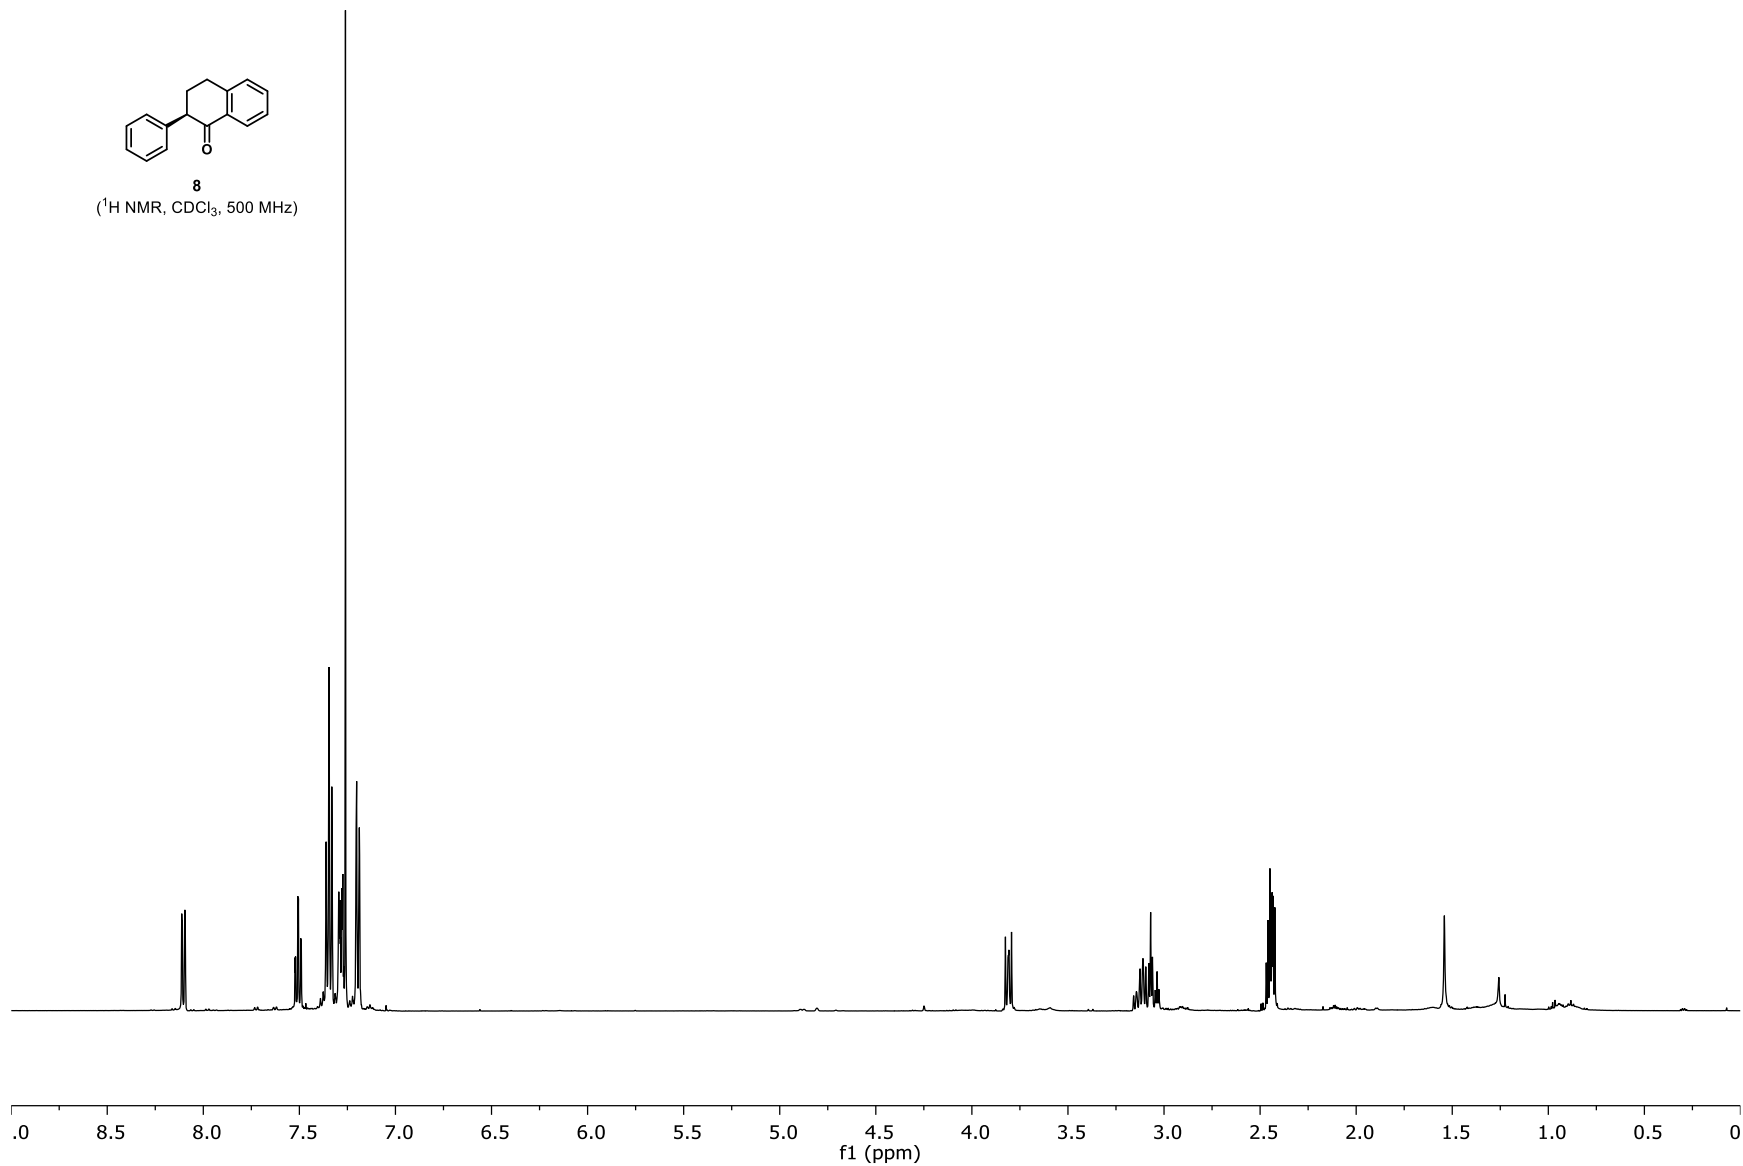

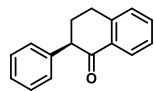

**8**  
(<sup>13</sup>C NMR, CDCl<sub>3</sub>, 126 MHz)

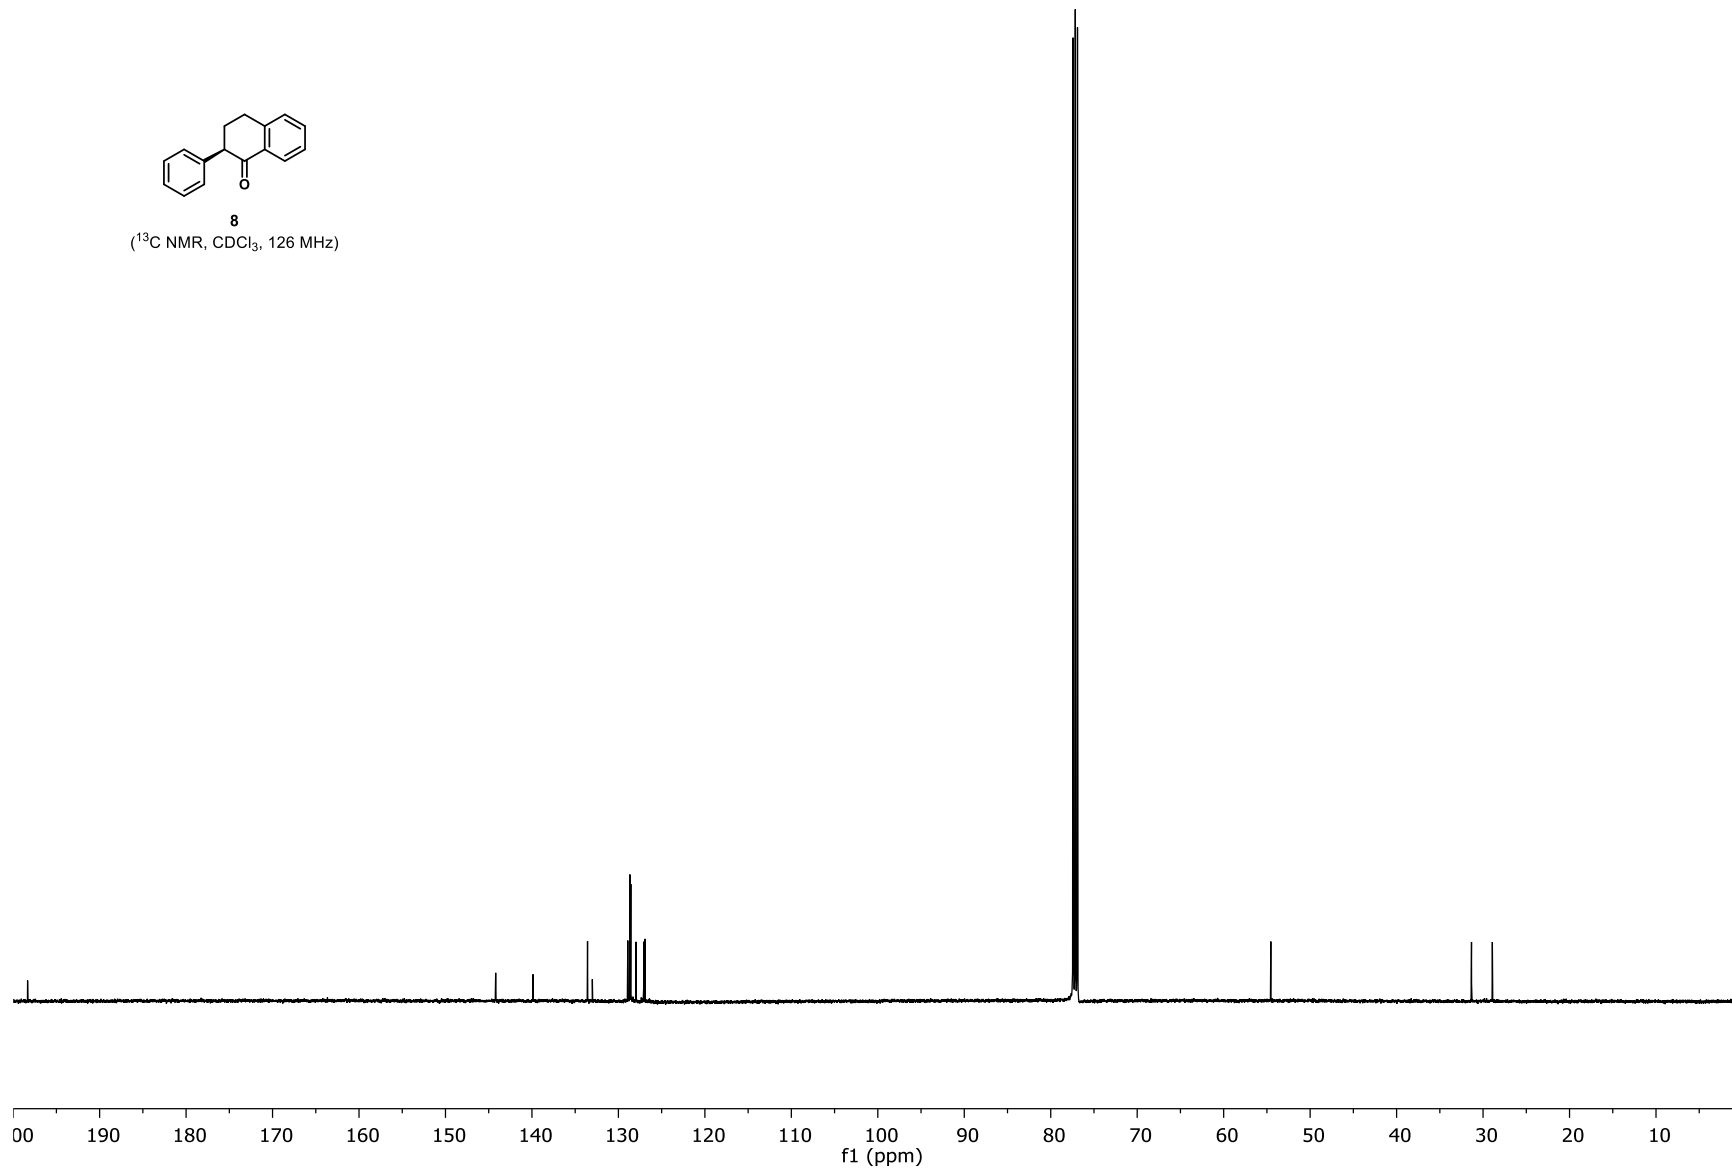

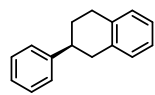

**9**

(<sup>1</sup>H NMR, CDCl<sub>3</sub>, 500 MHz)

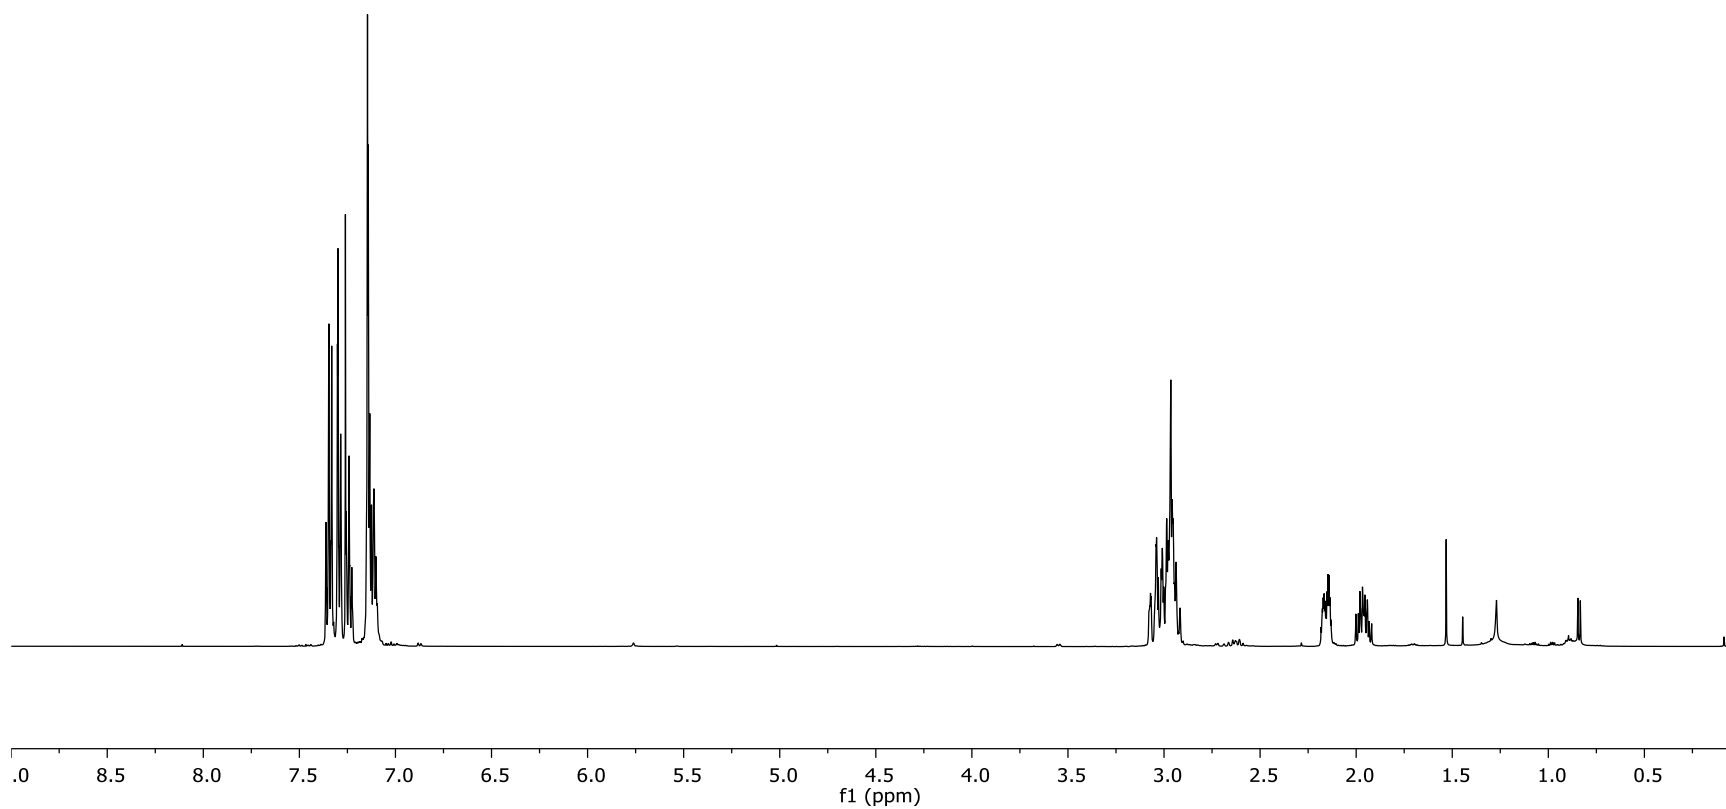

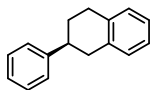

**9**

(<sup>13</sup>C NMR, CDCl<sub>3</sub>, 126 MHz)

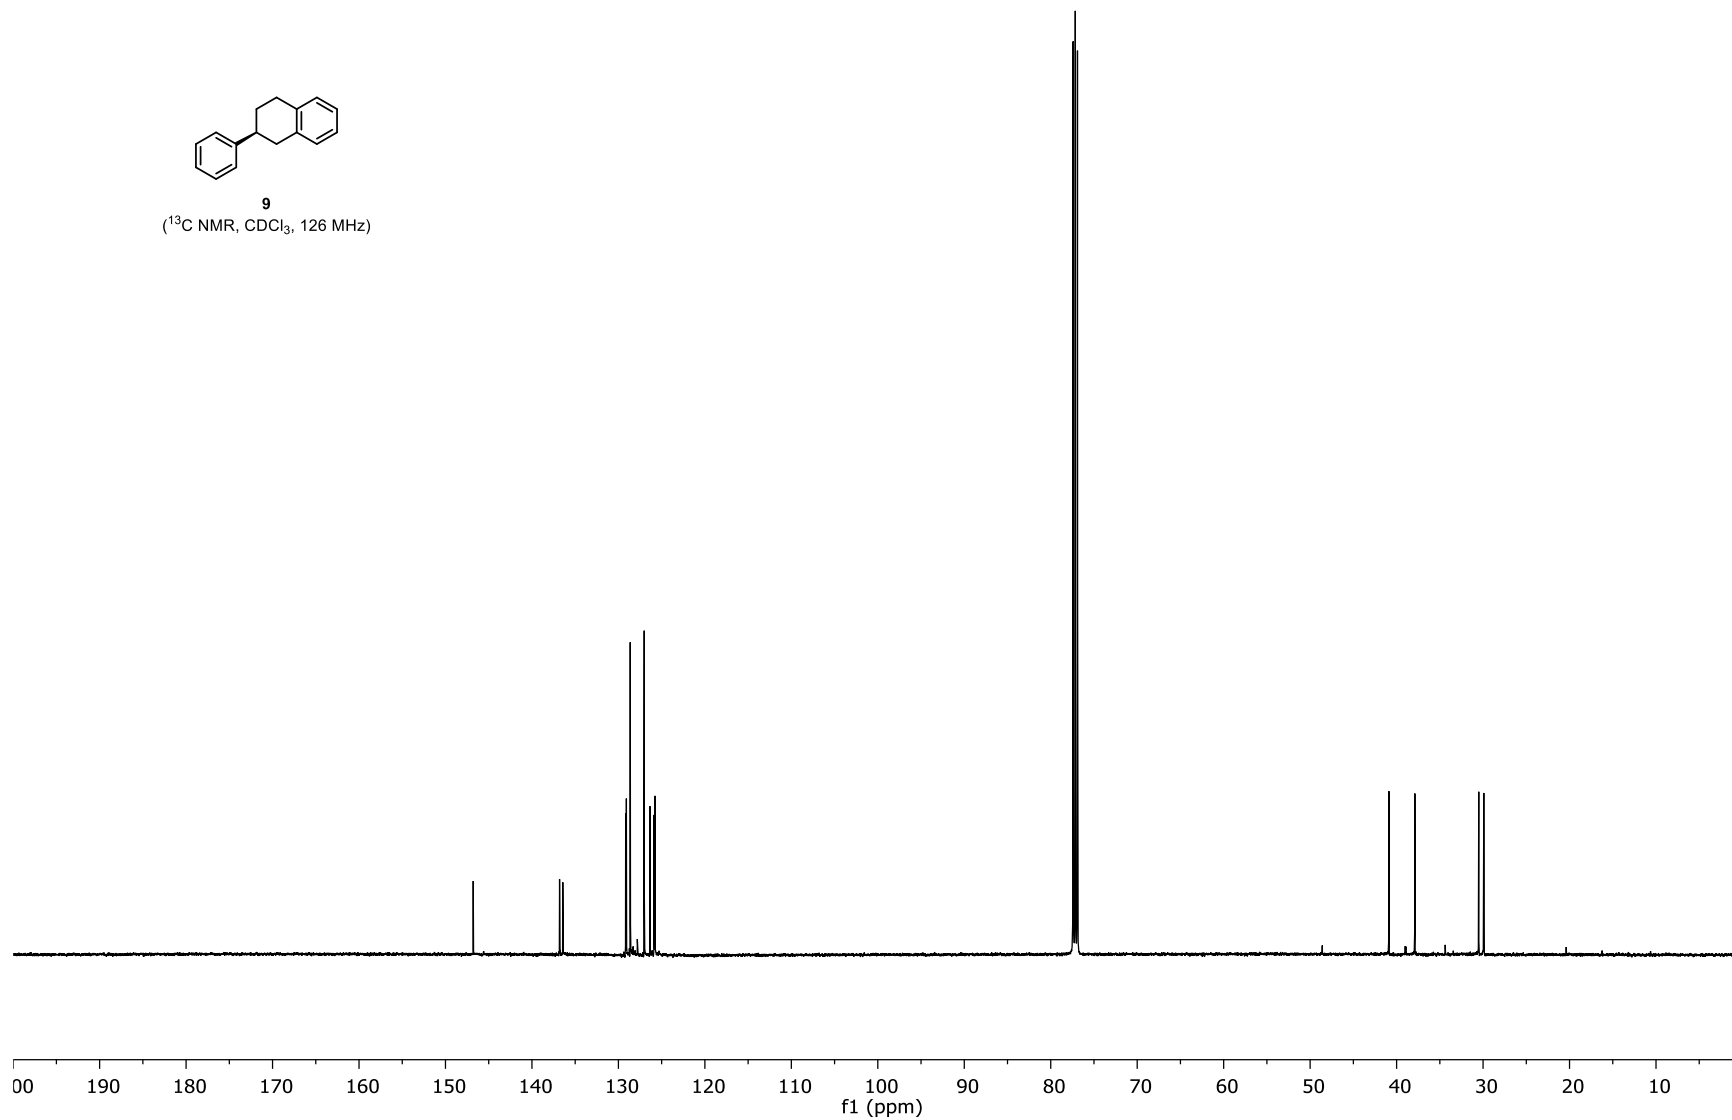

## 9. References

1. Breton, G. W.; Turlington, M. *Tetrahedron Lett.* **2014**, *55*, 4661.
2. Cookson, R. C.; Gupte, S. S.; Stevens, I. D. R.; Watts, C. T. *Org. Synth.* **1971**, *51*, 121.
3. Richards, C. J.; Mulvaney, A. W. *Tetrahedron: Asymmetry* **1996**, *7*, 1419.
4. Krout, M. R.; Mohr, J. T.; Stoltz, B. M. *Org. Synth.* **2009**, *86*, 181.
5. O'Neil, I. A. *Synlett* **1991**, *9*, 661.
6. Dolomanov, O. V.; Bourhis, L. J.; Gildea, R. J.; Howard, J. A. K.; Puschmann, J. *Appl. Cryst.* **2009**, *42*, 339.
7. Sheldrick, G. M. *Acta Cryst.* **2008**, *A64*, 112.
8. Huang, Z.; Lim, L. H.; Chen, Z.; Li, Y.; Zhou, F.; Su, H.; Zhou, J. *Angew. Chem. Int. Ed.* **2013**, *52*, 4906.
